# Supplementary material for: Genome biology of the darkedged splitfin, Girardinichthys multiradiatus, and the evolution of sex chromosomes and placentation
Source: HighWire-hosted journal article supplement (doi:10.1101/gr.275826.121), 2022-01-26
Supplement: Supplemental_Methods.docx [file Supplemental_Methods.docx]

Supplemental Methods

## DNA extractions and genome sequencing

Extraction of ultra-long genomic DNA. Ultra-long genomic DNA (gDNA) from snap-frozen tissues of two splitfin individuals has been extracted following the Bionano Prep Animal Tissue DNA Isolation Soft Tissue Protocol (Document Number 30077, document revision C). In brief, snap frozen soft tissue (liver and a mix of different organs such as spleen, kidney, eyes, brain) has been homogenized on ice in a tissue grinder and nuclei have been mildly fixed for 1 hour on ice with ice cold ethanol. The fixed homogenized tissue-nuclei mix was embedded into agarose plugs and all enzymatic treatments such as Proteinase K and RNAse treatment to purify the gDNA were applied to the agarose plugs. Genomic DNA was recovered from agarose plugs by agarase treatment and further purified by drop dialysis against a 1x TE buffer. The integrity of the HMW gDNA was determined by pulse field gel electrophoresis using the Pippin PulseTM device (SAGE Science). The majority of the gDNA was between 50 and 340 kb in length. All pipetting steps of ultra-long and long gDNA have been done very carefully with wide-bore pipette tips.

Postpurification of gDNA for Pacific Biosciences (PacBio) sequencing. Since the gDNA for PacBio sequencing was extracted from a mix of different organs containing also the eyes and gills, any co-extracted pigment that could affect the PacBio sequencing polymerase activity has been removed by post-purification step. The pigment was dissolved from gDNA by adding 1,2% Triton X-114 and 0,6% SDS (final, w/v), careful mixing and incubation for 10 min at room temperature. Pigment was precipitated under high salt conditions by centrifugation after adding 5M NaCl to a final concentration of 1 M (Ma et al. 2012, Analytical Biochemistry, 424: 124-126). The integrity of the post-purified gDNA has been determined by pulse field gel electrophoresis using the Pippin PulseTM device (SAGE Science). Fragment size after PFGE was between 50 and 250 kb in length.

The gDNA was further purified with 1x volume AMPure XP beads (Beckman Coulter) following the manufacturer’s instructions.

Pacbio library preparation and sequencing. Long insert libraries have been prepared as recommended by Pacific Bioscienes according to the ‘Guidelines for preparing size-selected 20 kb SMRTbellTM templates making use of the SMRTbell express Template kit 1.0. In summary, post-purified HMW gDNA of individual 1 has been sheared to 75 kb fragments with the MegaRuptorTM device (Diagenode) and 10 ug sheared gDNA have been used for library preparation. The PacBio SMRTbellTM library was size selected in two batches for fragments larger than 24 and 29 kb, respectively with the BluePippinTM device according to the manufacturer’s instructions.

The size selected library has been loaded with 13.5 pM on plate on nine Sequel SMRT cells (1M v2), Sequel polymerase 2.1 has been used in combination with the v4 PacBio sequencing primer and the Sequel sequencing kit 2.1, run time was 10 hours for all SMRT cells. A total of 73 Gb of unique insert reads have been generated, representing > 54x effective genome coverage.

10x genomic linked read sequencing. Ultra-long gDNA has been used for 10x genomic linked read sequencing following the manufacturer’s instructions (10x genomics ChromiumTM Reagent Kit v2, revision B). In brief, 1 ng of HMW gDNA of individual 1 (representing circa 900 genome equivalents) was amplified in 10x genome in gel beads (Gel Bead-In-EMulsions = GEM) making use of the ChromiumTM device. Individual gDNA molecules were amplified in these individual GEMS in an isothermal incubation using primers that contain a specific 16 bp 10x barcode and the Illumima® R1 sequence. After breaking the emulsions, pooled amplified barcoded fragments were purified, enriched and went into Illumina sequencing library preparation as described in the protocol. Sequencing has been done on a NovaSeq 6000 S1 flow cell using the 2x 150 cycles paired-end regime plus 8 cycles of i7 index at the Sequencing Core Facility of the Max Planck Institute for Molecular Genetics in Berlin, Germany. The 16 bp 10x barcodes allow the reconstitution of long DNA molecules by linking reads that carry the identical barcode.

Bionano optical mapping. Optical mapping was done according to the Bionano Prep Direct Label and Stain (DLS) Protocol (Document Number 30206, Document Revision F). In brief, 750 ng of ultra-long gDNA of individual 2 was sequence-specific labeled with a fluorophore-labeled nucleotide making use of the nicking-free Bionano Direct Label Enzyme (DLE-1). For further visualization, the DLE-1 labeled gDNA backbone was stained with DL-Green. Labeled molecules were imaged using the Bionano Saphyr system. Data were generated from one Bionano flow cell. The total yield of long molecules larger than 150 kb was 192 Gb.

Hi-C conformation capture for scaffolding. Hi-C confirmation capture and Illumina sequencing of a third individual was done at the DcGC by applying the Arima Genomics Hi-C kit and the library preparation using the KAPA® Hyper prep kit and KAPA® Library Quantification Kit (Roche Sequencing, Waltham, MA, USA). In brief, 76 mg of splitfin muscle tissue was cross-linked according to the Arima Hi-C user guide for Animal tissues (document number A160132 v01, Material Part Number: A510008). Following the large animal protocol, one third of the cross-linked tissue was digested with the Arima v1 two-enzyme cocktail, single stranded ends were filled, and these fragments were labeled with Biotin. Adjacent ends of the same cross-linked complex were ligated and purified resulting in proximity ligated DNA fragments. Shearing of the proximity ligated DNA has been done with the Covaris S2 (Covaris, Woburn, MA, USA) in Snap-Cap microTUBEs and they were selected for DNA fragments of 200-600 bps in size and finally enriched with Streptavidin-based enrichment beads. For Illumina library preparation, a modified version of the standard Kapa® Hyper prep protocol (version: A160139 v00) on enrichment beads has been applied. The final Illumina library was amplified with 6 PCR cycles and sequenced on an Illumina NovaSeq S2 flow cell with paired-end 150bp conditions.

## Genome assembly

De novo genome assembly was performed with DAmar (https://github.com/MartinPippel/DAmar). This assembler is based on an improved MARVEL assembler (https://github.com/schloi/MARVEL, commit ID: 5e17326) (Grohme et al. 2018; Nowoshilow et al. 2018) and the integration of parts from the DAZZLER (https://dazzlerblog.wordpress.com/, DALIGNER commit ID: 233274a; DAMASKER commit ID: bc7e49c; DASCRUBBER commit ID: 3491b14; DAZZ_DB commit ID: 340fd89; DEXTRACTOR commit ID: 2f51ccb) and the DACCORD code base (version: 0.0.14-release-20180525105343) (Tischler and Myers 2017).

To assemble the genome, we performed the following steps: setup, PacBio read patching, assembly, error-polishing, haplotype phasing, scaffolding and manual curation.

**Setup Phase.** PacBio reads were filtered by choosing only the longest read of each zero-mode waveguide (ZMW) and subsequently requiring a minimum read length of 4 kb. The resulting 3.2 million reads (65X coverage) were stored in a DAZZLER database.

**Read Patching.** The patch phase detects and corrects read artefacts including missed adapters, polymerase strand jumps, chimeric reads, and long low-quality read segments that are the primary impediments to long contiguous assemblies. To this end, we first computed local alignments of all raw reads. Because local alignment computation is by far the most time- and storage-consuming part of the pipeline, we reduced runtime and storage by masking repeats in the reads as follows. First, low-complexity intervals, such as microsatellites or homopolymers, were masked with DBdust (Dazzler Data Base, https://github.com/thegenemyers/DAZZ_DB9). Second, tandem repeats were masked by using datander and TANmask (DAMASKER, https://github.com/thegenemyers/DAMASKER). Third, we used a read alignment step to detect repeats. To this end, we first split all reads into groups representing 1× read coverage. For each group, we then aligned all reads against all others in the same group with daligner (DALIGNER, https://github.com/thegenemyers/DALIGNER) (Myers 2014) and masked all local regions in each read where ≥10 other reads aligned. The repeat masks were subsequently used to prevent k-mer seeding in repetitive regions when computing all local alignments between all reads. Then we applied LAfix to detect and correct read artefacts.

***De novo* assembly.** In the assembly phase, we first calculated all overlaps between patched reads using the same alignment strategy of the patch phase. The subsequent steps of (i) computing a quality track for all reads, (ii) computing a detailed repeat mask, (iii) filtering overlap piles, (iv) computing the overlap graph, (v) touring the overlap graph to obtain primary contigs, and (vi) base error correction to create consensus sequences for the primary contigs follow the steps of the original MARVEL assembly pipeline (Grohme et al. 2018; Nowoshilow et al. 2018).

**Haplotype purging.** The resulting corrected contigs were analysed and classified with CTanalyze, which separated the contigs into three different sets: primary, alternate and discarded. Contigs that are shorter than 20 kb in length, have an average coverage below 5, or are more than 80% repetitive were assigned to the discarded data set.

**Error polishing.** The primary and alternate contigs were further polished by using the raw PacBio reads and applying two rounds of Arrow (https://github.com/PacificBiosciences/GenomicConsensus.git) polishing. Arrow decodes polished sequences in capitals, whereas unpolished sequences are represented in lower case bases. DAmar contigs tend to end within large repeats, which could not always be fully polished. To facilitate the subsequent scaffolding process, uncorrected contig ends that remained after the second polishing round were trimmed back.

To further correct base errors and reduce remaining length errors in homopolymer regions, 10x read clouds were used. To map 10x read clouds to the Arrow-polished contigs, the 10x Genomics Longranger align pipeline (https://github.com/10XGenomics/longranger, version 2.2.0) (Marks et al. 2019) was applied, which uses the barcode-aware mapping tool Lariat. Afterwards the variant detector FreeBayes (version 1.3.2) (Garrison and Marth 2012) detected polymorphic positions and fixed erroneous non-polymorphic sites in the reference sequence using bcftools consensus (version 1.9) (https://github.com/samtools/bcftools). 10x read cloud polishing was iteratively applied in two rounds.

**Haplotype purging.** To remove any remaining duplications, mainly caused by overlapping contig ends, we applied purge_dups (https://github.com/dfguan/purge_dups, version 1.0.1) with default parameters.

**Haplotype phasing.** So far, the assembly pipeline did not account for heterozygous events at the base level and the contigs did contain a mixture of both alleles. To address this problem, the 10x Genomics Longranger wgs pipeline with FreeBayes (version 1.3.2) (Garrison and Marth 2012) as the variant caller was used. Based on the phased VCF output file, bcftools consensus was used to produce locally-phased primary contigs. Due to the relatively short 10x molecule length of 25.6 kb, the phased N50 is 595 kb.

**Bionano scaffolding.** Bionano *de novo* assembly: The Bionano raw molecules were assembled with Bionano Solve (Version 3.5.1) that offered command line tools for analysing Bionano data.

To assemble the optical maps, we used all molecules ≥150 kb that additionally have at least 9 sites. The number of extension and search operations was set from the default 5 to 7 and the default assembly option argument file (optArguments_nonhaplotype_DLE1_saphyr.xml) was used. The resulting Bionano consensus map has a length of 1277Mb with an N50 of 1.4Mb.

Bionano hybrid scaffolding:The input to the Bionano hybrid scaffolding were the locally phased primary contigs, which were digested *in silico* by using the DLE-1 motif and the previously created Bionano assemblies. The assembly was scaffolded with hybridScaffold.pl, which is also part of the Bionano Solve command line tools. The conflict filter level for Bionano cmaps and contig camps were set to 2, *i*._e_. if the genome map does not have long molecule support at the conflict junction, then the map is cut. Otherwise the sequence fragment is cut.

This resulted in 212 scaffolds with a N50 of 30.5Mb and a size of 1132Mb.

**Hi-C scaffolding.** To map the Hi-C Illumina read pairs to the previously created Bionano scaffolds the program bwa (version 0.7.17-r1194) (Li and Durbin 2009) was used. The alignments were filtered according to the Arima filtering protocol (https://github.com/ArimaGenomics/mapping_pipeline). The resulting alignments were scaffolded with the Hi-C scaffolder Salsa2 (version 2.2) (Ghurye et al. 2017). The clean option that detects mis-assemblies in the input assembly was enabled.

**Manual curation.** To visually inspect and validate the final scaffolds, we used the web-application HiGlass (DALIGNER, https://github.com/thegenemyers/DALIGNER). To this end, Hi-C reads were mapped with bwa (version 0.7.17-r1194) to the Salsa2 scaffolds and the alignments were filtered and successively converted into multi-resolution cooler files.

Our inspection revealed that the overall scaffolding quality was already quite high. However, visualization revealed a few false joins and unique off-diagonal interaction patterns that suggested joining scaffolds. Scaffolds were split if the Hi-C read mapping density around the diagonal was not supported. Scaffolds were joined if the read mapping density in the off-diagonal was increased and the map resolution allowed a unique placement. Six splits and 62 joins were manually performed and the curated scaffolds were validated again by HiGlass (version 0.6.3).

**Chromosome-scale haplotype phasing for scaffold 20.** The curated chromosomes were phased by applying an adapted version of the DipAsm pipeline (https://www.nature.com/articles/s41587-020-0711-0), calling heterozygous sites using 10x reads and creating phase blocks by linking heterozygous sites in 10x, Hi-C and PacBio reads using HapCUT2 (https://github.com/vibansal/HapCUT2, git commit: 1ee1d58) and whatshap (Martin et al. 2016). The whatshap-haplotagged PacBio and 10x reads binned into H0 and H1, and H0 and H2 were then used to haplotype-polish the chromosome. Arrow was run using the combined H0 and H1 haplotagged PacBio lofi reads, followed by freebayes polishing using combined H0 and H1 haplotagged 10x reads, and correspondingly using H0 and H2 tagged reads for the second haplotype.

## Genome annotation

The genome was annotated using our previously described pipeline (Du et al. 2019; Du et al. 2020; Powell et al. 2020) which was improved for this study as described below. First, the assembly was scanned by RepeatModeler and checked with a repeat database by RepeatProteinMask and RepeatMasker for repeat masking (open-4.0.7, http://www.repeatmasker.org/). We hard-masked those repeats from known families while leaving the simple and low-complexity repeats soft-masked. After repeat masking, we collected gene evidence from homology, transcriptome and ab-initio predictions to predict protein coding genes. For homology evidence, 455,817 protein sequences were used as query. These included the vertebrate database from Swiss-Prot (https://www.uniprot.org/statistics/Swiss-Prot), proteins with ID starting with “NP” from RefSeq database (only “vertebrate_other”) and the human genome (GCF_000001405.39_GRCh38), all proteins from zebrafish (GCF_000002035.6), platyfish (GCF_002775205.1), medaka (GCF_002234675.1), mummichog (GCF_011125445.2), turquoise killifish (GCF_001465895.1), and guppy (GCF_000633615.1). Genewise (Birney et al. 2004) and Exonerate (https://www.ebi.ac.uk/about/vertebrate-genomics/software/exonerate) were used to map the query onto the repeat masked assembly and determine the gene structure. GenblastA (She et al. 2009) was used prior to Genewise to find the rough alignment location. For transcriptome evidence, we collected the RNA-seq reads from mixed tissue, ovary, trophotaenia and embryos, and cleaned them using fastp (Chen et al. 2018). Then in one parallel approach, we mapped the reads onto the repeat masked assembly using HISAT (Kim et al. 2015) and determined the gene structure using StringTie (Pertea et al. 2015). In the other parallel, reads were first assembled to transcripts using Trinity (Haas et al. 2013), and then transcripts were aligned to the assembly in order to build gene models using PASA (Haas et al. 2003). 1684 gene models, with each splice side consistently agreed by Genewise, exonerate, StringTie and PASA, are high-quality predictions and were used to train AUGUSTUS (Stanke et al. 2006). The trained AUGUSTUS was then run for ab-initio prediction with all predictions from above as hints.

To make the final consensus annotation, we screened homology gene models throughout the assembly: when multiple models compete for a splice side, the one with better support from StringTie/PASA wins; when a terminal exon (with start/stop codon) from ab-initio or homology prediction is better supported by StringTie/PASA than the winner’s, the winner’s corresponding exon will be replaced. We also kept an ab-initio prediction when its StingTie/PASA support was 100% and it has no homology prediction competing for splice sites.

In the end, the final annotation went through InterProscan (https://www.ebi.ac.uk/interpro/search/sequence/) for protein-domain check, BUSCO (Simão et al. 2015) for assessing completeness, and Swiss-Prot & RefSeq BLAST (Camacho et al. 2009; Buchfink et al. 2015) for gene symbol and name assignment. 20216 (85%) of the 21657 multi-exon gene had at least one splice site supported by RNA-seq data.

Non-coding RNAs (ncRNAs) were annotated using the method adapted from Ensembl (http://ensemblgenomes.org/info/data/ncrna). tRNAscan-SE v.2.0.3 (Chan and Lowe 2019) was used for screening tRNAs, RNAmmer (Lagesen et al. 2007) for ribosomal RNAs (rRNA). microRNA and the remainder of the ncRNAs were predicted using Infernal with Rfam v.14.1 (Nawrocki and Eddy 2013; Kalvari et al. 2017).

## Orthology assignment

For genome comparison, we downloaded the genome annotation results for *Astyanax mexicanus*, *Clupea harengus*, *Danio rerio*, *Fundulus heteroclitus*, *Hippocampus comes*, *Oryzias latipes*, *Perca flavescens*, *Takifugu rubripes* and *Xiphophorus maculatus* from NCBI (https://www.ncbi.nlm.nih.gov/). For each protein-coding gene, the longest protein sequence was taken as the representation. Together with our annotation for *Girardinichthys multiradiatus*, a protein database containing 238,385 sequences was built.

To assign orthology among the 10 species, we first ran an “all vs. all” BLAST with the protein database as both query and subject (Camacho et al. 2009). “H-score” was then calculated according to the BLAST result to represent the sequence similarity between two proteins (Cho et al. 2013). Second, based on “H-score”, Hcluster_sg (Ruan et al. 2007) was used to cluster all proteins into different orthologous groups (Supplemental Fig. S15). Then a gene tree was built for each group using TreeBeST v.0.5 (Ponting 2007). Finally, based on the tree topology, orthology relationships between each two orthologs were typed as “*n* to *m*”, where *n* and *m* represent the number of paralogous genes in the respective genome.

Between chromosomes from two species, only orthologs with conserved synteny (at least five orthologous genes arranged in a row with the largest gap being fewer than 15 genes) were used to depict orthology in a Circos diagram (Krzywinski et al. 2009).

## Phylogenetic analysis

To most accurately identify orthologous sequences for phylogenetic analysis, we first included orthologs that are single copy in each of the 10 species, and then removed those with non-conserved synteny. 1425 orthologs were left to build the phylogenetic tree and infer divergence time of species. Protein sequences of the orthologs were aligned using MAFFT (Nakamura et al. 2018). Bad alignment regions were trimmed using trimAl (Capella-Gutiérrez et al. 2009). Then all alignments were concatenated into a huge alignment consisting of 1,000,117 amino acid sites. We used RAxML v.8.2.9 to conduct a maximum likelihood reconstruction of phylogenetic tree with 100 bootstrap replicates to confirm robustness (Stamatakis 2014). We also reconstructed the tree using MrBayes v.3.2.6 for confirmation (Ronquist et al. 2012). Six Markov chains were launched for 500,000 generations. Sampling was done every 1,000 generations and the first 125 samples were discarded in case the chains were not convergent. The average standard deviation of split frequencies was confirmed ≤0.01 during the remaining 375 samplings.

Divergence time of species was inferred using MCMCTree under a relaxed-clock model (Yang 2007; Inoue et al. 2011). First, we used modelgenerator.jar to determine the optimal substitution model, with which, baseml roughly estimated the substitution rate based on the phylogenetic tree and coding-sequence alignment (Yang 2007; Stamatakis et al. 2008). Second, we ran MCMCTree for the first time to estimate the gradient and Hessian. Finally, MCMCTree was run again with the result information from the first run to perform approximate likelihood calculations. In the calculation, the first 5000 steps were discarded as burn-in, then sampling was done every 5000 steps for 2000 samples. Two time-calibrations were set: *O*. *latipes*–*T*. *nigroviridis* (~96.9–150.9Ma) and Clupeiformes-Cypriniformes (~185-225Ma) (Near et al. 2012; Lin et al. 2016; Hughes et al. 2018).

## Differential gene expression analysis

After duplicate and barcode removal reads were aligned to the *Girardinichthys multiradiatus* genome version 2.0 using the STAR aligner version 2.5 (–runMode alignReads –quantMode GeneCounts) (Dobin et al. 2013). Resulting read counts were used by DESeq2 (Love et al. 2014) for differential gene analysis. For further analysis, only expressed genes were considered. “Expressed” was defined as normalized read count >10 in at least one sample. To find genes predominantly expressed in trophotaenia or ovary the respective tissue was compared to all other tissue types and an upregulation of log2 fold change >2 was required. This corresponds to the term ‘tissue enhanced’ used by the Human Protein Atlas (https://www.proteinatlas.org/), from where the human proteins enhanced in placenta (elevated expression in the placenta compared to other tissue types) had been downloaded for comparison with splitfin trophotaenia and ovary.

To compare the transcriptomes of follicles of the matrotrophic species *Poeciliopsis retropinna* (Guernsey et al. 2020) with our datasets files (GSE138615) were downloaded from the Sequence Read Archive, converted into FASTA format, mapped to the assembly of the *Poeciliopsis occidentalis* genome (Mateos et al. 2019) and further treated analogously to the *Girardinichthys multiradiatus* samples.

Functional clustering was performed by the Database for Annotation, Visualization and Integrated Discovery (DAVID, https://david.ncifcrf.gov/) using human homologues. Venn diagrams were drawn using the online tool Venny (<https://bioinfogp.cnb.csic.es/tools/venny/>).

To test overlapping genes between two species/organs as shown in the Venn diagrams for statistical significance, for each comparison 10 random gene sets of the same size were generated and the overlap between these gene sets compared to the observed overlapping genes by a one sided, one sample *t*-test. If more than two groups were shown in the Venn diagram, p-values were adjusted using FDR. For gene expression studies random genes drawn from the genomes were considered. Only Venn diagrams with a significantly enriched number of overlapping genes are shown (adjusted P < 0.01).

## Positive selection

To estimate genes under positive selection in *Girardinichthys multiradiatus*, the protein and cDNA FASTA files for eleven phylogeny-based chosen species of fish were downloaded from NCBI (Supplemental Table S21). Orthologous proteins of all fish were identified using inparanoid (Berglund et al. 2007) with default settings. For each gene with a protein ortholog across all species (n=7102), the corresponding protein and cDNA sequences were aligned and converted into a codon alignment using pal2nal (version v14) (Suyama et al. 2006). Resulting sequences were aligned by MUSCLE (Edgar 2004) (option: -fastaout) and non-conserved blocks were removed using Gblocks (version 0.91b) (Castresana 2000) (options: -b4 10 -b5 n –b3 5 –t=c). The Gblocks output was converted to phylip using script fasta-to-phylip from BioHacks (https://github.com/audy/bioinformatics-hacks) and to paml format using an in-house script (Supplemental Code). For the phylogenetic analyses by maximum likelihood the ‘Environment for Tree Exploration’ (ETE3) toolkit (Huerta-Cepas et al. 2016), which automates CodeML and Slr analyses by using pre-configured evolutionary models, was used based on our phylogenetic tree. For the detection of positive selection in *Girardinichthys multiradiatus*, we calculated two branch-site specific models, which involved model bsA1 (neutral) versus model bsA (positive selection) to identify sites under positive selection on a specific branch. In case a logrank test (FDR ≤0.05) between both models was significant for a gene, to detect genes with some sites under positive selection, a site was required to have a probability > 0.95 for either site class 2a (positive selection in marked branch and conserved in rest) or site class 2b (positive selection in marked branch and relaxed in rest). FDR was calculated using “p.adjust” from the R package “stats.”

Due to the unavailability of an annotated genome, to find positively selected genes in *Poeciliopsis retropinna* the 7102 orthologous proteins of all fish found in the previous step were blasted against the *Poeciliopsis retropinna* genome (ASM1027707v1) and aligned to the corresponding coding sequences using MUSCLE. Non-conserved blocks and introns were removed using Gblocks.

To test overlapping genes between two species/organs as shown in the Venn diagram for statistical significance, we did the same procedure as outlined for the differential expression analysis. Only genes included in the selection analysis were taken. Again only those comparisons with adjusted p <0.01 were considered.

## RAD-tag sequencing and analysis of sex-specific markers

Genomic DNA of 29 females and 27 males was extracted from 90% ethanol-preserved fin clips using a classical phenol/chloroform protocol (Du et al. 2020). The splitfin RAD-tag library was built according to standard protocols (Catchen et al. 2011), using *Sbf1* as a single restriction enzyme, and sequenced on a single lane of HiSeq 2500 using the v4 SR100nt mode. The resulting read file was then demultiplexed using the process_radtags.pl script of STACKS software version 1.44 (Catchen et al. 2013) with default settings.

Demultiplexed reads were analyzed with RADSex version 1.1.2 (Feron et al.) (https://github.com/RomainFeron/RadSex, doi: 10.5281/zenodo.3775206). RADSex sorts reads from the demultiplexed dataset into groups sharing the exact same sequence, and reads that would belong to the same polymorphic locus using standard analysis software are simply split into multiple markers. As a result, RADSex markers are non-polymorphic, thus allowing straightforward presence/absence comparison between individuals.

First, a table of depth for each RADSex marker in each individual from the dataset was generated using the radsex *process* with default settings. Then, the distribution of markers in males and females was computed with radsex *distrib* using a minimum depth of 10 (–min-cov 10) to consider a marker present in an individual, and a tile plot was generated from this distribution using the *plot_sex_distribution*() function from the *sgtr* R package version 1.1.2 (doi:10.5281/zenodo.3766090) (Computing 2013). Analyses were also run with a minimum depth of 2, 5, and 10, and the value 1 was chosen because of low sequencing depth in several males, but results were qualitatively similar for all minimum depth values. A total of 6,359,801 markers were obtained present in at least one individual with a minimum depth of 1.

Markers were aligned to the genome assembly using radsex *map* with minimum depth of 1 and other settings to default. A manhattan plot of p-value of association with sex for all markers aligned to the assembly was generated with the *radsex_map_manhattan*() function of *sgtr* and a plot of p-value of association with sex for all markers on the sex chromosome was generated with the *radsex_map_region*() function of *sgtr*.

Analyses were run on the GenoToul computational platform using a Snakemake workflow (Köster and Rahmann 2012) (<https://github.com/RomainFeron/paper-sexdetermination-splitfin>).

## Comparison of the X and Y Chromosomes

After resolving scaffold 20 into haplotypes, we remapped the RADSex markers onto the whole assembly (autosomes, X and Y) using the Snakemake workflow (Köster and Rahmann 2012) (https://github.com/RomainFeron/paper-sexdetermination-splitfin) and identified the scaffold with the most RADsex markers as Y.

The DNA sequences of X and Y were aligned using Minimap2 (Li 2018) and sequence differences were calculated in a 100 kb sliding window along the aligned region as a percentage of SNP and indels.

To estimate pairwise *d*S and *d*N/*d*S values between alleles on X and Y, we first performed a liftover of gene annotations from scaffold 20 to the X and Y, respectively, using Liftoff (Shumate and Salzberg 2020). Each pair of alleles was aligned as protein sequence using MAFFT (Nakamura et al. 2018) and then converted into coding sequence alignment using PAL2NAL (Suyama et al. 2006). Alignment gaps were removed using Gblocks (Talavera and Castresana 2007). The pairwise dN and *d*N/*d*S values were then estimated for each allele pair using codeml in the pairwise model (Yang 2007).

A pseudogene is normally defined by frameshift or premature stop codon (PSC) revealed in the protein-DNA alignment. Even though in some cases a frameshift and/or PSC is caused by sequencing errors in the assembly or alignment mistakes, pseudogenization of the gene content in chromosomes could be evaluated and compared by the percentage of “pseudogene” given the usage of the same aligning criterion and the same sequencing delivery. Hence we aligned the 455,817 proteins used in the previous genome annotation to autosomes, X and Y using Exonerate with parameter “–percent 30 –maxintron 200000 –bestn 3” (https://www.ebi.ac.uk/about/vertebrate-genomics/software/exonerate). Alignments with frameshift or PSCs were then taken as pseudogene and the proportion was used to compare the pseudogenization of the gene content of autosomes, the X and Y Chromosome.

To identify the potential sex determining gene (SDG), we first searched for genes on Y and X that are not present on the other haplotype. Additional genes were retrieved by aligning annotated genes on scaffold 20 to X and Y respectively using Exonerate (regions that are aligned to each other were masked before). Then we aimed on genes located in the Y-specific region (MAY) that have allelic diversification between X and Y.

## Reference

Berglund A-C, Sjölund E, Östlund G, Sonnhammer EL. 2007. InParanoid 6: eukaryotic ortholog clusters with inparalogs. *Nucleic acids research* **36**: D263-D266.

Birney E, Clamp M, Durbin R. 2004. GeneWise and genomewise. *Genome research* **14**: 988-995.

Buchfink B, Xie C, Huson DH. 2015. Fast and sensitive protein alignment using DIAMOND. *Nature methods* **12**: 59-60.

Camacho C, Coulouris G, Avagyan V, Ma N, Papadopoulos J, Bealer K, Madden TL. 2009. BLAST+: architecture and applications. *BMC bioinformatics* **10**: 421.

Capella-Gutiérrez S, Silla-Martínez JM, Gabaldón T. 2009. trimAl: a tool for automated alignment trimming in large-scale phylogenetic analyses. *Bioinformatics* **25**: 1972-1973.

Castresana J. 2000. Selection of conserved blocks from multiple alignments for their use in phylogenetic analysis. *Molecular biology and evolution* **17**: 540-552.

Catchen J, Hohenlohe PA, Bassham S, Amores A, Cresko WA. 2013. Stacks: an analysis tool set for population genomics. *Molecular ecology* **22**: 3124-3140.

Catchen JM, Amores A, Hohenlohe P, Cresko W, Postlethwait JH. 2011. Stacks: building and genotyping loci de novo from short-read sequences. *G3: Genes, genomes, genetics* **1**: 171-182.

Chan PP, Lowe TM. 2019. tRNAscan-SE: searching for tRNA genes in genomic sequences. In *Gene Prediction*, pp. 1-14. Springer.

Chen S, Zhou Y, Chen Y, Gu J. 2018. fastp: an ultra-fast all-in-one FASTQ preprocessor. *Bioinformatics* **34**: i884-i890.

Cho YS, Hu L, Hou H, Lee H, Xu J, Kwon S, Oh S, Kim H-M, Jho S, Kim S. 2013. The tiger genome and comparative analysis with lion and snow leopard genomes. *Nature communications* **4**: ncomms3433.

Computing R. 2013. R: A language and environment for statistical computing. *Vienna: R Core Team*.

Dobin A, Davis CA, Schlesinger F, Drenkow J, Zaleski C, Jha S, Batut P, Chaisson M, Gingeras TR. 2013. STAR: ultrafast universal RNA-seq aligner. *Bioinformatics* **29**: 15-21.

Du K, Stöck M, Kneitz S, Klopp C, Woltering JM, Adolfi MC, Feron R, Prokopov D, Makunin A, Kichigin I. 2020. The sterlet sturgeon genome sequence and the mechanisms of segmental rediploidization. *Nature Ecology & Evolution* **4**: 841-852.

Du K, Wuertz S, Adolfi M, Kneitz S, Stöck M, Oliveira M, Nóbrega R, Ormanns J, Kloas W, Feron R. 2019. The genome of the arapaima (Arapaima gigas) provides insights into gigantism, fast growth and chromosomal sex determination system. *Scientific Reports* **9**: 5293.

Edgar RC. 2004. MUSCLE: multiple sequence alignment with high accuracy and high throughput. *Nucleic acids research* **32**: 1792-1797.

Feron R, Pan Q, Wen M, Imarazene B, Jouanno E, Anderson J, Herpin A, Journot L, Parrinello H, Klopp C. 2021. RADSex: A computational workflow to study sex determination using restriction site‐associated DNA sequencing data. *Molecular Ecology Resources* **21**: 1715-1731.

Garrison E, Marth G. 2012. Haplotype-based variant detection from short-read sequencing. *arXiv preprint arXiv:12073907*.

Ghurye J, Pop M, Koren S, Bickhart D, Chin CS. 2017. Scaffolding of long read assemblies using long range contact information. *BMC Genomics* **18**: 527.

Grohme MA, Schloissnig S, Rozanski A, Pippel M, Young GR, Winkler S, Brandl H, Henry I, Dahl A, Powell S et al. 2018. The genome of Schmidtea mediterranea and the evolution of core cellular mechanisms. *Nature* **554**: 56-61.

Guernsey MW, van Kruistum H, Reznick DN, Pollux BJ, Baker JC. 2020. Molecular signatures of placentation and secretion uncovered in Poeciliopsis maternal follicles. *Molecular biology and evolution* **37**: 2679-2690.

Haas BJ, Delcher AL, Mount SM, Wortman JR, Smith Jr RK, Hannick LI, Maiti R, Ronning CM, Rusch DB, Town CD. 2003. Improving the Arabidopsis genome annotation using maximal transcript alignment assemblies. *Nucleic acids research* **31**: 5654-5666.

Haas BJ, Papanicolaou A, Yassour M, Grabherr M, Blood PD, Bowden J, Couger MB, Eccles D, Li B, Lieber M. 2013. De novo transcript sequence reconstruction from RNA-seq using the Trinity platform for reference generation and analysis. *Nature protocols* **8**: 1494.

Huerta-Cepas J, Serra F, Bork P. 2016. ETE 3: reconstruction, analysis, and visualization of phylogenomic data. *Molecular biology and evolution* **33**: 1635-1638.

Hughes LC, Ortí G, Huang Y, Sun Y, Baldwin CC, Thompson AW, Arcila D, Betancur-R R, Li C, Becker L. 2018. Comprehensive phylogeny of ray-finned fishes (Actinopterygii) based on transcriptomic and genomic data. *Proceedings of the National Academy of Sciences* **115**: 6249-6254.

Inoue J, Dos Reis M, Yang Z. 2011. A step-by-step tutorial: Divergence time estimation with approximate likelihood calculation using MCMCTREE in PAML. Citeseer.

Kalvari I, Argasinska J, Quinones-Olvera N, Nawrocki EP, Rivas E, Eddy SR, Bateman A, Finn RD, Petrov AI. 2017. Rfam 13.0: shifting to a genome-centric resource for non-coding RNA families. *Nucleic acids research* **46**: D335-D342.

Kim D, Langmead B, Salzberg SL. 2015. HISAT: a fast spliced aligner with low memory requirements. *Nature methods* **12**: 357-360.

Köster J, Rahmann S. 2012. Snakemake—a scalable bioinformatics workflow engine. *Bioinformatics* **28**: 2520-2522.

Krzywinski M, Schein J, Birol I, Connors J, Gascoyne R, Horsman D, Jones SJ, Marra MA. 2009. Circos: an information aesthetic for comparative genomics. *Genome research* **19**: 1639-1645.

Lagesen K, Hallin P, Rødland E, Stærfeldt H, Rognes T, Ussery D. 2007. RNammer: consistent annotation of rRNA genes in genomic sequences. *Nucleic Acids Res* **35**: 3100-3108.

Li H. 2018. Minimap2: pairwise alignment for nucleotide sequences. *Bioinformatics* **34**: 3094-3100.

Li H, Durbin R. 2009. Fast and accurate short read alignment with Burrows-Wheeler transform. *Bioinformatics* **25**: 1754-1760.

Lin Q, Fan S, Zhang Y, Xu M, Zhang H, Yang Y, Lee AP, Woltering JM, Ravi V, Gunter HM. 2016. The seahorse genome and the evolution of its specialized morphology. *Nature* **540**: 395.

Love MI, Huber W, Anders S. 2014. Moderated estimation of fold change and dispersion for RNA-seq data with DESeq2. *Genome biology* **15**: 550.

Marks P, Garcia S, Barrio AM, Belhocine K, Bernate J, Bharadwaj R, Bjornson K, Catalanotti C, Delaney J, Fehr A. 2019. Resolving the full spectrum of human genome variation using Linked-Reads. *Genome research* **29**: 635-645.

Martin M, Patterson M, Garg S, Fischer S, Pisanti N, Klau GW, Schöenhuth A, Marschall T. 2016. WhatsHap: fast and accurate read-based phasing. *BioRxiv*: 085050.

Mateos M, Kang D, Klopp C, Parrinello H, Garcia M, Schumer M, Jue N, Guiguen Y, Schartl M. 2019. Draft genome assembly and annotation of the Gila topminnow Poeciliopsis occidentalis. *Frontiers in Ecology and Evolution* **7**: 404.

Myers G. 2014. Efficient Local Alignment Discovery amongst Noisy Long Reads. pp. 52-67. Springer Berlin Heidelberg, Berlin, Heidelberg.

Nakamura T, Yamada KD, Tomii K, Katoh K. 2018. Parallelization of MAFFT for large-scale multiple sequence alignments. *Bioinformatics* **34**: 2490-2492.

Nawrocki EP, Eddy SR. 2013. Infernal 1.1: 100-fold faster RNA homology searches. *Bioinformatics* **29**: 2933-2935.

Near TJ, Eytan RI, Dornburg A, Kuhn KL, Moore JA, Davis MP, Wainwright PC, Friedman M, Smith WL. 2012. Resolution of ray-finned fish phylogeny and timing of diversification. *Proceedings of the National Academy of Sciences* **109**: 13698-13703.

Nowoshilow S, Schloissnig S, Fei J-F, Dahl A, Pang AW, Pippel M, Winkler S, Hastie AR, Young G, Roscito JG. 2018. The axolotl genome and the evolution of key tissue formation regulators. *Nature* **554**: 50-55.

Pertea M, Pertea GM, Antonescu CM, Chang T-C, Mendell JT, Salzberg SL. 2015. StringTie enables improved reconstruction of a transcriptome from RNA-seq reads. *Nature biotechnology* **33**: 290-295.

Ponting C. 2007. TreeBeST: Tree building guided by Species Tree.

Powell DL, García-Olazábal M, Keegan M, Reilly P, Du K, Díaz-Loyo AP, Banerjee S, Blakkan D, Reich D, Andolfatto P. 2020. Natural hybridization reveals incompatible alleles that cause melanoma in swordtail fish. *Science* **368**: 731-736.

Ronquist F, Teslenko M, Van Der Mark P, Ayres DL, Darling A, Höhna S, Larget B, Liu L, Suchard MA, Huelsenbeck JP. 2012. MrBayes 3.2: efficient Bayesian phylogenetic inference and model choice across a large model space. *Systematic biology* **61**: 539-542.

Ruan J, Li H, Chen Z, Coghlan A, Coin LJM, Guo Y, Heriche J-K, Hu Y, Kristiansen K, Li R. 2007. TreeFam: 2008 update. *Nucleic acids research* **36**: D735-D740.

She R, Chu JS-C, Wang K, Pei J, Chen N. 2009. GenBlastA: enabling BLAST to identify homologous gene sequences. *Genome research* **19**: 143-149.

Shumate A, Salzberg SL. 2020. Liftoff: accurate mapping of gene annotations. *Bioinformatics*.

Simão FA, Waterhouse RM, Ioannidis P, Kriventseva EV, Zdobnov EM. 2015. BUSCO: assessing genome assembly and annotation completeness with single-copy orthologs. *Bioinformatics* **31**: 3210-3212.

Stamatakis A. 2014. RAxML version 8: a tool for phylogenetic analysis and post-analysis of large phylogenies. *Bioinformatics* **30**: 1312-1313.

Stamatakis A, Hoover P, Rougemont J. 2008. A rapid bootstrap algorithm for the RAxML web servers. *Systematic biology* **57**: 758-771.

Stanke M, Keller O, Gunduz I, Hayes A, Waack S, Morgenstern B. 2006. AUGUSTUS: ab initio prediction of alternative transcripts. *Nucleic acids research* **34**: W435-W439.

Suyama M, Torrents D, Bork P. 2006. PAL2NAL: robust conversion of protein sequence alignments into the corresponding codon alignments. *Nucleic acids research* **34**: W609-W612.

Talavera G, Castresana J. 2007. Improvement of phylogenies after removing divergent and ambiguously aligned blocks from protein sequence alignments. *Systematic biology* **56**: 564-577.

Tischler G, Myers EW. 2017. Non hybrid long read consensus using local de Bruijn graph assembly. *bioRxiv*: 106252.

Yang Z. 2007. PAML 4: phylogenetic analysis by maximum likelihood. *Molecular biology and evolution* **24**: 1586-1591.
