# Supplementary material for: Genome biology of the darkedged splitfin, Girardinichthys multiradiatus, and the evolution of sex chromosomes and placentation
Source: HighWire-hosted journal article supplement (doi:10.1101/gr.275826.121), 2022-01-26
Supplement: Supplemental_Tables.xlsx [file Supplemental_Tables.xlsx]

## Sheet: S1
Supplemental Table S1. Reads from different sequencing for assembling the genome of Darkedged splitfin
technics	reads count	bases count	longest read length	mean read length	min read length	N50	coverage
PacBio	3234619	72635497266	93277	22455	4000	31215	65
Bionano	30065422	2074520456000		69000		101625	1870
10X	378502598			151			52
HiC	693105526			151			94

## Sheet: S2
Supplemental Table S2. Individuals used for differenct sequencing
Technology	Individual	tissue	Extraction
Pacbio	a	Organ mix	Bionano Prep™ _Animal Tissue DNA Isolation Soft Tissue Protocol, pigment removal by Triton/SDS treatment
10x linked reads	a	liver	Bionano Prep™ _Animal Tissue DNA Isolation Soft Tissue Protocol
Bionano	b	soft inner organ mix	Bionano Prep™ _Animal Tissue DNA Isolation Soft Tissue Protocol
HiC	c	body muscle	ARIMA Hi-C+ (outsourced to ARIMA Genomics Inc.)

## Sheet: S3
Supplemental Table S3. Metrics for the assembly.
Number of scaffolds	71
Total size of scaffolds	1109656301
Longest scaffold	53595407
Shortest scaffold	15762
Number of scaffolds > 1K nt	71	1
Number of scaffolds > 10K nt	71	1
Number of scaffolds > 100K nt	39	0.549
Number of scaffolds > 1M nt	24	0.338
Number of scaffolds > 10M nt	24	0.338
Mean scaffold size	15628962
Median scaffold size	114679
N50 scaffold length	49294359
L50 scaffold count	11
scaffold %A	29.75
scaffold %C	19.98
scaffold %G	19.97
scaffold %T	29.75
scaffold %N	0.55
scaffold %non-ACGTN	0
Number of scaffold non-ACGTN nt	0
Percentage of assembly in scaffolded contigs	0.997
Percentage of assembly in unscaffolded contigs	0.003
Average number of contigs per scaffold	3.4
Average length of break (>25 Ns) between contigs in scaffold	35775
Number of contigs	243
Number of contigs in scaffolds	199
Number of contigs not in scaffolds	44
Total size of contigs	1103502863
Longest contig	40467625
Shortest contig	15762
Number of contigs > 1K nt	243	1
Number of contigs > 10K nt	243	1
Number of contigs > 100K nt	202	0.831
Number of contigs > 1M nt	123	0.506
Number of contigs > 10M nt	31	0.128
Mean contig size	4541164
Median contig size	1036364
N50 contig length	17439455
L50 contig count	21
contig %A	29.91
contig %C	20.09
contig %G	20.08
contig %T	29.91
contig %N	0
contig %non-ACGTN	0
Number of contig non-ACGTN nt	0

## Sheet: S4
Supplemental Table S4. BUSCO reports based on actinopterygii_odb9 database before and after genome annotation
	before annotation		after annotation
Complete BUSCOs (C)	4417	0.964	4550	0.993
Complete and single-copy BUSCOs (S)	4316	0.942	4418	0.964
Complete and duplicated BUSCOs (D)	101	0.022	132	0.029
Fragmented BUSCOs (F)	56	0.012	29	0.006
Missing BUSCOs (M)	111	0.024	5	0.001
Total BUSCO groups searched	4584		4584

## Sheet: S5
Supplemental Table S5. DNA, repeat content, gene and non-coding RNA for each chromosome and unassigned scaffold in the assembly of Girardinichthys multiradiatus.
	chromosome name	length (bp)	GC%	repeats content					number of annotated genes	ncRNA genes
				SINEs	LINEs	LTR elements	DNA elements	Total interspersed repeats		tRNA	rRNA	microRNA	Other RNA
chromosomes	scaffold_1	53595407	0.4008	0.0019	0.0755	0.0427	0.1355	0.3224	1165	69	1	6	15
	scaffold_2	53588987	0.4019	0.002	0.0799	0.0475	0.1393	0.3383	1179	86	2	14	4
	scaffold_3	53525161	0.4013	0.0021	0.0773	0.0474	0.1429	0.3388	1251	63	0	4	17
	scaffold_4	52808390	0.4003	0.0021	0.0774	0.0488	0.1359	0.334	992	54	0	13	19
	scaffold_5	52235079	0.4018	0.0019	0.0784	0.0485	0.1401	0.3474	996	84	1	11	26
	scaffold_6	52166090	0.4019	0.0022	0.0765	0.0517	0.1509	0.3552	1145	107	8	15	33
	scaffold_7	51973266	0.401	0.0023	0.0768	0.0568	0.1428	0.3605	965	143	0	9	12
	scaffold_8	50424604	0.401	0.0022	0.0772	0.0447	0.1389	0.3339	1051	62	1	8	11
	scaffold_9	50038080	0.4016	0.0022	0.0735	0.0421	0.1409	0.3246	1195	77	1	20	18
	scaffold_10	50016704	0.4017	0.0021	0.0761	0.0557	0.1445	0.3518	937	62	1	63	9
	scaffold_11	49294359	0.401	0.002	0.0749	0.0409	0.1387	0.324	1163	51	1	7	12
	scaffold_12	47419503	0.4015	0.002	0.0764	0.0436	0.1453	0.3354	1106	88	0	19	18
	scaffold_13	46655092	0.4022	0.0026	0.0847	0.0597	0.1376	0.3634	971	59	0	0	16
	scaffold_14	45871450	0.4016	0.0022	0.0749	0.045	0.1421	0.3307	862	117	1	14	6
	scaffold_15	45398086	0.4002	0.0022	0.0747	0.0443	0.1463	0.3358	980	100	0	14	16
	scaffold_16	43759233	0.4023	0.0021	0.0771	0.0498	0.1434	0.3414	953	61	0	11	19
	scaffold_17	42987196	0.4009	0.0023	0.077	0.0478	0.143	0.3385	935	89	1	12	11
	scaffold_18	42588851	0.4037	0.0021	0.0725	0.06	0.1393	0.3489	730	91	0	7	13
	scaffold_19	42509712	0.4034	0.002	0.0762	0.0448	0.1466	0.3387	985	57	0	3	9
	scaffold_20	41719932	0.4026	0.0022	0.0743	0.0485	0.1582	0.3498	1189	68	0	11	15
	scaffold_21	40859051	0.4026	0.0021	0.0755	0.0496	0.1437	0.3396	905	77	2	4	16
	scaffold_22	38405040	0.4015	0.0022	0.0752	0.039	0.1494	0.3329	946	49	1	3	19
	scaffold_23	30793443	0.402	0.002	0.0702	0.0356	0.1442	0.3101	608	30	0	7	12
	scaffold_24	26818115	0.4055	0.0013	0.0724	0.0508	0.1405	0.3354	521	155	0	4	9
unassigned scaffolds	scaffold_25	451284	0.3988	0.0009	0.0536	0.0266	0.0432	0.196	0	0	0	0	0
	scaffold_26	201521	0.3874	0	0.1411	0.1194	0.1264	0.5068	2	1	0	0	0
	scaffold_27	184944	0.4242	0.0036	0.0538	0.0759	0.1482	0.3646	2	0	0	0	0
	scaffold_28	183856	0.419	0	0.1028	0.0877	0.3774	0.8524	1	0	0	0	0
	scaffold_29	140381	0.395	0	0.17	0.0907	0.091	0.5129	0	0	0	0	0
	scaffold_30	133400	0.4175	0	0.1866	0.1433	0.0613	0.6411	1	0	0	0	0
	scaffold_31	127576	0.396	0	0.2471	0.0427	0.1119	0.5185	1	0	0	0	0
	scaffold_32	127000	0.4007	0	0.0587	0.015	0.4317	0.6015	1	0	0	0	0
	scaffold_33	122028	0.4032	0	0.1585	0.2496	0.081	0.6727	0	0	0	0	0
	scaffold_34	119673	0.4089	0.0011	0.0042	0	0.098	0.2078	2	0	0	0	0
	scaffold_35	118581	0.4373	0.0035	0.153	0.0859	0.0706	0.4276	0	0	0	0	0
	scaffold_36	114679	0.404	0	0.0523	0.1939	0.2022	0.5492	2	0	0	0	0
	scaffold_37	105285	0.3693	0.0049	0.0766	0.0896	0.1107	0.3792	1	0	0	0	0
	scaffold_38	104195	0.3946	0.0074	0.0718	0.077	0.077	0.4376	1	0	0	0	0
	scaffold_39	100853	0.4011	0.0036	0.2498	0.1432	0.2798	0.8076	0	0	0	0	0
	scaffold_40	97395	0.4185	0	0.1193	0	0.1046	0.3161	3	0	0	0	0
	scaffold_41	93170	0.4086	0.0032	0.038	0.1885	0.5294	0.8232	2	0	0	0	0
	scaffold_42	90617	0.4134	0.0095	0.1661	0.0368	0.1716	0.6381	1	0	0	0	0
	scaffold_43	85687	0.4029	0	0.0761	0.187	0.2094	0.6991	1	0	0	0	0
	scaffold_44	84394	0.4473	0	0.0585	0	0.1593	0.26	2	0	0	0	0
	scaffold_45	78422	0.4063	0.0079	0.2195	0.0504	0.2235	0.6802	0	0	0	0	0
	scaffold_46	77103	0.3868	0.0047	0.1715	0.0254	0.0855	0.4905	0	0	0	0	0
	scaffold_47	75514	0.418	0	0.1393	0.0456	0.1246	0.5158	3	0	0	0	0
	scaffold_48	74776	0.4218	0	0.0322	0.0013	0.2428	0.7531	0	0	0	0	0
	scaffold_49	72100	0.4192	0	0.1239	0.1004	0.1855	0.7913	0	0	0	0	0
	scaffold_50	70675	0.3948	0	0.0488	0.1756	0.3853	0.7634	1	0	0	0	0
	scaffold_51	66152	0.4003	0	0.0778	0.1431	0.0983	0.7149	1	0	0	0	0
	scaffold_52	64281	0.4221	0	0.1193	0	0.1171	0.3209	0	0	0	0	0
	scaffold_53	63101	0.4403	0.0059	0.0272	0.0058	0.1165	0.2034	2	0	0	0	0
	scaffold_54	61283	0.4058	0	0.2052	0.141	0.1088	0.6336	0	0	0	0	0
	scaffold_55	60788	0.4014	0	0.23	0.0487	0.1846	0.5234	3	0	0	0	0
	scaffold_56	59075	0.4085	0	0.1034	0.0693	0.1077	0.3752	2	0	0	0	0
	scaffold_57	58980	0.4897	0	0	0	0.239	0.8847	0	0	0	0	0
	scaffold_58	56913	0.4853	0	0	0	0.1428	0.8967	0	0	0	0	0
	scaffold_59	54538	0.3812	0	0.0277	0.0048	0.0983	0.1675	2	0	0	0	0
	scaffold_60	53637	0.3976	0.006	0.0765	0.0282	0.3355	0.7008	0	0	0	0	0
	scaffold_61	53516	0.4164	0	0.2634	0.1354	0.1839	0.6465	0	0	0	0	0
	scaffold_62	48976	0.4067	0	0	0.0448	0.588	0.6582	0	0	0	0	0
	scaffold_63	48590	0.3586	0	0	0	0.6669	0.8416	0	0	0	0	0
	scaffold_64	46160	0.3766	0	0.024	0	0.2406	0.2872	3	0	0	0	0
	scaffold_65	45848	0.4259	0	0	0	0.142	0.5195	0	0	0	0	0
	scaffold_66	39224	0.4007	0	0.0244	0.4734	0.3482	0.9354	0	0	0	0	0
	scaffold_67	20077	0.4068	0	0	0.3207	0.1224	0.9805	0	0	0	0	0
	scaffold_68	19529	0.4136	0	0	0.0063	0.3781	0.456	0	0	0	0	0
	scaffold_69	18034	0.3796	0.0146	0.0778	0	0.1534	0.5342	0	0	0	0	0
	scaffold_70	15897	0.4612	0	0	0	0.0422	1.017	0	0	0	0	0
	scaffold_71	15762	0.4093	0	0	0.0018	0.6168	0.6414	0	0	0	0	0
Total		1109656301							23770	1900	21	279	355

## Sheet: S6
Supplemental Table S6. Repeat content in genomes
	Austrofundulus limnaeus			Fundulus heteroclitus			Gambusia affinis			Girardinichthys multiradiatus			Oryzias latipes			Xiphophorus maculatus			Nothobranchius furzeri			Poecilia reticulata
Item	number of elements	length occupied	percentage of sequence	number of elements	length occupied	percentage of sequence	number of elements	length occupied	percentage of sequence	number of elements	length occupied	percentage of sequence	number of elements	length occupied	percentage of sequence	number of elements	length occupied	percentage of sequence	number of elements	length occupied	percentage of sequence	number of elements	length occupied	percentage of sequence
SINEs:	14849	2370019 bp	0.0027	34558	7859452 bp	0.0065	17147	2931663 bp	0.0049	14792	3263757 bp	0.0029	31591	5851400 bp	0.008	11991	2301570 bp	0.0033	36440	8725037 bp	0.007	16583	3375546 bp	0.0046
ALUs	14	2919 bp	0	45	13832 bp	0	12	3107 bp	0	6	2376 bp	0	4289	702726 bp	0.001	19	5739 bp	0	1582	839370 bp	0.0007	18	5127 bp	0
MIRs	2966	611950 bp	0.0007	5938	917151 bp	0.0008	453	81934 bp	0.0001	558	99771 bp	0.0001	1379	228787 bp	0.0003	373	65609 bp	0.0001	25643	5794251 bp	0.0047	384	65845 bp	0.0001
LINEs:	95671	34706914 bp	0.04	219403	112782359 bp	0.0937	26773	7257484 bp	0.0121	133724	86215614 bp	0.0778	74736	42990290 bp	0.0586	41408	17908163 bp	0.0254	179686	93434387 bp	0.0752	37396	13870825 bp	0.019
LINE1	2809	1906333 bp	0.0022	18168	13787307 bp	0.0115	664	309950 bp	0.0005	641	7219338 bp	0.0065	9895	9392671 bp	0.0128	1335	1444145 bp	0.0021	10757	6693194 bp	0.0054	1017	852038 bp	0.0012
LINE2	27168	10777764 bp	0.0124	116525	56903544 bp	0.0473	16138	3926186 bp	0.0066	6804	36559942 bp	0.033	28668	16434027 bp	0.0224	20585	6739255 bp	0.0096	63918	35148965 bp	0.0283	17943	5480225 bp	0.0075
L3/CR1	33	9874 bp	0	8	8259 bp	0	18	4888 bp	0	10	0 bp	0	173	42762 bp	0.0001	43	13681 bp	0	8	1175 bp	0	4	308 bp	0
LTR elements:	24594	10103565 bp	0.0117	29286	24357053 bp	0.0202	11640	2776886 bp	0.0046	52641	55131049 bp	0.05	23838	16602983 bp	0.0226	15501	10979078 bp	0.0156	25727	18412510 bp	0.0148	21620	7378917 bp	0.0101
ERVL	23	7941 bp	0	0	0 bp	0	0	0 bp	0	0	0 bp	0	59	42660 bp	0.0001	1	81 bp	0	0	0 bp	0	0	0 bp	0
ERVL-MaLRs	0	0 bp	0	0	0 bp	0	0	0 bp	0	0	0 bp	0	0	0 bp	0	0	0 bp	0	0	0 bp	0	0	0 bp	0
ERV_classI	1935	1455591 bp	0.0017	3440	5186837 bp	0.0043	177	82912 bp	0.0001	17202	27331398 bp	0.0248	1608	1392324 bp	0.0019	994	1042673 bp	0.0015	2831	1957947 bp	0.0016	590	396380 bp	0.0005
ERV_classII	50	5335 bp	0	25	9680 bp	0	13	3794 bp	0	18	6242 bp	0	19	3063 bp	0	24	6155 bp	0	681	195778 bp	0.0002	22	5703 bp	0
DNA elements:	270773	81943911 bp	0.0945	414946	138212199 bp	0.1148	168597	40090493 bp	0.0669	350509	167499991 bp	0.1509	239130	86211704 bp	0.1174	207965	59844280 bp	0.085	195346	88712990 bp	0.0714	196014	60255814 bp	0.0824
hAT-Charlie	46473	13589157 bp	0.0157	23474	8915580 bp	0.0074	15514	3344344 bp	0.0056	5961	3661819 bp	0.0033	47455	18363578 bp	0.025	19317	5917188 bp	0.0084	16839	8363541 bp	0.0067	22974	10063469 bp	0.0138
TcMar-Tigger	422	112936 bp	0.0001	1273	381193 bp	0.0003	1776	467142 bp	0.0008	17	6180 bp	0	5881	2113223 bp	0.0029	2260	707263 bp	0.001	2052	823514 bp	0.0007	1791	631962 bp	0.0009
Unclassified:	231021	74867328 bp	0.0864	264693	110808171 bp	0.0921	106005	26629671 bp	0.0445	142388	86717717 bp	0.0785	237293	85766318 bp	0.1168	148253	54043669 bp	0.0767	281464	115400135 bp	0.0929	119592	35294615 bp	0.0482
Total interspersed repeats	-	203991737 bp	0.2353	-	394019234 bp	0.3274	-	79686197 bp	0.133	-	398828128 bp	0.3602	-	237422695 bp	0.3234	-	145076760 bp	0.206	-	324685059 bp	0.2613	-	120175717 bp	0.1643
Small RNA:	631	113877 bp	0.0001	559	285225 bp	0.0002	2688	436316 bp	0.0007	322	84718 bp	0.0001	1327	304258 bp	0.0004	2569	545143 bp	0.0008	1691	450528 bp	0.0004	1870	325537 bp	0.0004
Satellites:	1955	668205 bp	0.0008	1199	740193 bp	0.0006	294	143984 bp	0.0002	384	313141 bp	0.0003	1589	585247 bp	0.0008	671	405702 bp	0.0006	1091	446615 bp	0.0004	571	246952 bp	0.0003
Simple repeats:	273062	14078980 bp	0.0162	438235	22245853 bp	0.0185	225622	8761707 bp	0.0146	214462	12594819 bp	0.0113	184778	10127206 bp	0.0138	224234	10843673 bp	0.0154	311948	18899151 bp	0.0152	250419	10912887 bp	0.0149
Low complexity:	34363	1611226 bp	0.0019	46480	2349975 bp	0.002	34128	1567456 bp	0.0026	31289	1575163 bp	0.0014	28693	1323631 bp	0.0018	33119	1568030 bp	0.0022	23585	1237584 bp	0.001	35369	1652470 bp	0.0023
Total masked	-	219961498 bp	0.2537	-	419062556 bp	0.3482	-	89996062 bp	0.1503	-	412912119 bp	0.3727	-	249268811 bp	0.3396	-	157365500 bp	0.2234	-	344901373 bp	0.2776	-	132737023 bp	0.1814

## Sheet: S7
Supplemental Table S7. Differentialy expressed genes in male and female brain
higher in male			higher in female
id	symbol	description	id	symbol	description
g9863.t1	-	galactose-specific lectin nattectin-like [Kryptolebias marmoratus]	g6376.t1	-	SITS-binding protein-like [Fundulus heteroclitus]
g2276.t1	-	uncharacterized protein LOC105923225 [Fundulus heteroclitus]	g20161.t1	-	uncharacterized protein LOC105930128 isoform X2 [Fundulus heteroclitus]
g1642.t1	-	uncharacterized protein LOC105931377 [Fundulus heteroclitus]	g19665.t1	ABCC1	PREDICTED: multidrug resistance-associated protein 1-like isoform X1 [Poecilia reticulata]
g8901.t1	-	LOW QUALITY PROTEIN: keratin, type II cytoskeletal 8-like [Myripristis murdjan]	g19986.t1	ALDH16A1	aldehyde dehydrogenase family 16 member A1 [Fundulus heteroclitus]
g11386.t1	-	-	g23309.t1	Alkal2	PREDICTED: protein FAM150B-like [Poecilia mexicana]
g2277.t1	-	PREDICTED: uncharacterized protein LOC102295251 [Haplochromis burtoni]	g11526.t1	APOH	sushi, von Willebrand factor type A, EGF and pentraxin domain-containing protein 1-like [Fundulus heteroclitus]
g20699.t1	-	PREDICTED: keratin, type I cytoskeletal 13-like [Cyprinodon variegatus]	g20070.t1	C17orf75	protein Njmu-R1 isoform X1 [Xiphophorus couchianus]
g2471.t1	-	uncharacterized protein LOC105931267 [Fundulus heteroclitus]	g20147.t1	CACNG5	voltage-dependent calcium channel gamma-5 subunit-like [Fundulus heteroclitus]
g20964.t1	moronecidin	moronecidin-like isoform X1 [Xiphophorus couchianus]	g11229.t1	Cd22	B-cell receptor CD22-like [Fundulus heteroclitus]
g2213.t1	CFAP157	cilia- and flagella-associated protein 157-like [Xiphophorus maculatus]	g12867.t1	Col11a1	PREDICTED: collagen alpha-1(XI) chain-like [Poecilia formosa]
g7301.t1	imh1	golgin IMH1-like isoform X4 [Fundulus heteroclitus]	g20166.t1	F10	coagulation factor X-like [Xiphophorus couchianus]
g13890.t1	-	uncharacterized protein LOC105919169 isoform X1 [Fundulus heteroclitus]	g22125.t1	FADS6	fatty acid desaturase 6-like [Xiphophorus couchianus]
g13585.t1	-	uncharacterized protein LOC105927905 [Fundulus heteroclitus]	g20452.t1	FKBP10	PREDICTED: LOW QUALITY PROTEIN: peptidyl-prolyl cis-trans isomerase FKBP10 [Poecilia latipinna]
g4642.t1	-	PREDICTED: uncharacterized protein LOC103129660 [Poecilia formosa]	g12674.t1	foxc1a	forkhead box C1-A-like [Xiphophorus couchianus]
g10966.t1	-	PREDICTED: uncharacterized protein C8orf88 homolog [Poecilia latipinna]	g4711.t1	FOXL2	PREDICTED: forkhead box protein L2 [Cyprinodon variegatus]
g16184.t1	-	uncharacterized protein LOC105934473 [Fundulus heteroclitus]	g19812.t1	GCDH	PREDICTED: glutaryl-CoA dehydrogenase, mitochondrial [Cyprinodon variegatus]
g13352.t1	isp	type-2 ice-structuring protein-like [Fundulus heteroclitus]	g20371.t1	Igfals	insulin-like growth factor-binding protein complex acid labile subunit isoform X1 [Fundulus heteroclitus]
g4151.t1	-	uncharacterized protein C16orf46 homolog [Fundulus heteroclitus]	g8242.t1	LPL	lipoprotein lipase-like [Fundulus heteroclitus]
g14419.t1	tex36	testis-expressed protein 36 [Parambassis ranga]	g19820.t1	Mcoln1	mucolipin-1-like isoform X2 [Fundulus heteroclitus]
g4661.t1	anxb11	annexin B11-like [Fundulus heteroclitus]	g5683.t1	Met	PREDICTED: hepatocyte growth factor receptor isoform X1 [Poecilia reticulata]
g13538.t1	-	uncharacterized protein LOC105926269 isoform X4 [Fundulus heteroclitus]	g423.t1	MMEL1	PREDICTED: membrane metallo-endopeptidase-like 1 isoform X2 [Poecilia latipinna]
g23265.t1	-	uncharacterized protein LOC114161420 [Xiphophorus couchianus]	g17465.t1	Mpo	PREDICTED: eosinophil peroxidase-like [Cyprinodon variegatus]
g2155.t1	-	rho-associated protein kinase 2-like [Fundulus heteroclitus]	g19619.t1	NFE2L1	nuclear factor erythroid 2-related factor 1-like [Fundulus heteroclitus]
g4603.t1	-	-	g19808.t1	nfil3	nuclear factor interleukin-3-regulated protein [Fundulus heteroclitus]
g11649.t1	-	uncharacterized protein LOC105939672 [Fundulus heteroclitus]	g19782.t1	Nptxr	neuronal pentraxin-2-like [Xiphophorus hellerii]
g3687.t1	-	uncharacterized protein LOC117441563 isoform X2 [Pseudochaenichthys georgianus]	g20397.t1	NUDT1	7,8-dihydro-8-oxoguanine triphosphatase [Fundulus heteroclitus]
g17147.t1	-	PREDICTED: uncharacterized protein LOC103466981 isoform X1 [Poecilia reticulata]	g14301.t1	PANK1	PREDICTED: pantothenate kinase 3-like isoform X1 [Poecilia mexicana]
g23369.t1	-	-	g19719.t1	PECAM1	platelet endothelial cell adhesion molecule-like isoform X2 [Fundulus heteroclitus]
g1953.t1	-	uncharacterized protein LOC105926788 [Fundulus heteroclitus]	g16899.t1	PKHD1L1	fibrocystin-L [Fundulus heteroclitus]
g16517.t1	-	uncharacterized protein LOC105929611 [Fundulus heteroclitus]	g19927.t1	Pmm1	phosphomannomutase 1 [Fundulus heteroclitus]
g503.t1	-	uncharacterized protein LOC114161420 [Xiphophorus couchianus]	g20419.t1	RAMP1	receptor activity-modifying protein 2 [Fundulus heteroclitus]
g18413.t1	-	uncharacterized protein LOC105935744 [Fundulus heteroclitus]	g19810.t1	Rgl1	PREDICTED: ral guanine nucleotide dissociation stimulator-like 1 [Cyprinodon variegatus]
g8995.t1	-	nuclear mitotic apparatus protein 1-like isoform X2 [Fundulus heteroclitus]	g15020.t1	SLC13A5	PREDICTED: solute carrier family 13 member 5-like [Cyprinodon variegatus]
g9218.t1	-	PREDICTED: uncharacterized protein LOC103467299 [Poecilia reticulata]	g22275.t1	SLC16A5	monocarboxylate transporter 6 [Fundulus heteroclitus]
g19632.t1	-	uncharacterized protein LOC115778134 isoform X1 [Archocentrus centrarchus]	g19567.t1	SLC16A6	monocarboxylate transporter 7 [Fundulus heteroclitus]
g17983.t1	samd3	sterile alpha motif domain-containing protein 3-like isoform X1 [Archocentrus centrarchus]	g918.t1	Slc2a9	PREDICTED: solute carrier family 2, facilitated glucose transporter member 9 [Poecilia formosa]
g18456.t1	-	uncharacterized protein LOC117490432 isoform X1 [Trematomus bernacchii]	g4737.t1	SLC43A2	PREDICTED: large neutral amino acids transporter small subunit 4-like isoform X2 [Poecilia mexicana]
g10565.t1	-	uncharacterized protein LOC105937174 [Fundulus heteroclitus]	g9936.t1	Slc6a8	sodium- and chloride-dependent creatine transporter 1 [Fundulus heteroclitus]
g20025.t1	-	Ig heavy chain Mem5-like [Xiphophorus maculatus]	g1908.t1	SV2C	PREDICTED: synaptic vesicle glycoprotein 2C [Poecilia reticulata]
g2943.t1	1700088E04Rik	UPF0193 protein EVG1 [Fundulus heteroclitus]	g20266.t1	Tbcd	PREDICTED: tubulin-specific chaperone D [Cyprinodon variegatus]
g18028.t1	4930550C14Rik	uncharacterized protein C11orf65 homolog isoform X1 [Fundulus heteroclitus]	g19800.t1	tmem205	transmembrane protein 205 [Xiphophorus maculatus]
g4755.t1	A2M	alpha-2-macroglobulin [Fundulus heteroclitus]	g19585.t1	Vwc2	von Willebrand factor C domain-containing protein 2-like [Fundulus heteroclitus]
g4754.t1	A2ML1	alpha-2-macroglobulin [Fundulus heteroclitus]
g23765.t1	A2ML1	alpha-2-macroglobulin [Fundulus heteroclitus]
g10500.t1	ABCB11	bile salt export pump [Xiphophorus maculatus]
g6830.t1	ACSL1	long-chain-fatty-acid--CoA ligase 1-like isoform X2 [Xiphophorus couchianus]
g7594.t1	Adad1	PREDICTED: adenosine deaminase domain-containing protein 1 [Poecilia mexicana]
g17671.t1	AKNA	AT-hook-containing transcription factor isoform X3 [Fundulus heteroclitus]
g12533.t1	AKNAD1	protein AKNAD1 isoform X1 [Xiphophorus couchianus]
g22808.t1	AKR1D1	PREDICTED: 3-oxo-5-beta-steroid 4-dehydrogenase-like [Austrofundulus limnaeus]
g22810.t1	AKR1D1	PREDICTED: 3-oxo-5-beta-steroid 4-dehydrogenase-like [Austrofundulus limnaeus]
g22812.t1	AKR1D1	3-oxo-5-beta-steroid 4-dehydrogenase-like [Acanthochromis polyacanthus]
g2807.t1	Alox15b	arachidonate 15-lipoxygenase B-like [Fundulus heteroclitus]
g21524.t1	Ankef1	ankyrin repeat and EF-hand domain-containing protein 1 isoform X1 [Fundulus heteroclitus]
g13786.t1	ANKRD53	ankyrin repeat domain-containing protein 53 [Fundulus heteroclitus]
g4281.t1	ANPEP	aminopeptidase Ey-like isoform X1 [Xiphophorus maculatus]
g18104.t1	ARMC3	armadillo repeat-containing protein 3 [Fundulus heteroclitus]
g17954.t1	ARMC4	armadillo repeat-containing protein 4 [Fundulus heteroclitus]
g19685.t1	aspdh	putative L-aspartate dehydrogenase [Xiphophorus hellerii]
g6674.t1	ATP6V1E1	PREDICTED: V-type proton ATPase subunit E 1 isoform X1 [Cyprinodon variegatus]
g14533.t1	Avpi1	PREDICTED: arginine vasopressin-induced protein 1 [Poecilia mexicana]
g19783.t1	baiap2l2	PREDICTED: brain-specific angiogenesis inhibitor 1-associated protein 2-like protein 2 isoform X1 [Cyprinodon variegatus]
g10528.t1	BAZ2B	bromodomain adjacent to zinc finger domain protein 2B-like isoform X2 [Xiphophorus couchianus]
g22542.t1	birc5.2	baculoviral IAP repeat-containing protein 5.2 [Maylandia zebra]
g23444.t1	Boll	protein boule-like [Xiphophorus couchianus]
g14399.t1	bora	PREDICTED: protein aurora borealis isoform X1 [Poecilia formosa]
g13829.t1	BTN1A1	myelin-oligodendrocyte glycoprotein-like [Fundulus heteroclitus]
g6707.t1	C15orf65	uncharacterized protein C15orf65 homolog [Kryptolebias marmoratus]
g4769.t1	C1QL3	collagen alpha-1(VIII) chain-like [Fundulus heteroclitus]
g22562.t1	Cabcoco1	PREDICTED: uncharacterized protein C10orf107 homolog [Poecilia reticulata]
g5187.t1	Cacna1i	voltage-dependent T-type calcium channel subunit alpha-1H-like isoform X1 [Xiphophorus couchianus]
g19909.t1	Card11	caspase recruitment domain-containing protein 11-like isoform X1 [Fundulus heteroclitus]
g12730.t1	Ccdc13	coiled-coil domain-containing protein 13 isoform X2 [Xiphophorus couchianus]
g2938.t1	CCDC151	coiled-coil domain-containing protein 151 [Fundulus heteroclitus]
g17704.t1	CCDC152	coiled-coil domain-containing protein 152 [Acanthochromis polyacanthus]
g12693.t1	CCDC178	coiled-coil domain-containing protein 178 isoform X1 [Fundulus heteroclitus]
g8163.t1	CCDC181	PREDICTED: coiled-coil domain-containing protein 181 [Cyprinodon variegatus]
g430.t1	CCDC30	coiled-coil domain-containing protein 30-like isoform X1 [Xiphophorus hellerii]
g539.t1	CCDC36	PREDICTED: coiled-coil domain-containing protein 36 [Poecilia reticulata]
g12192.t1	ccdc39	coiled-coil domain-containing protein 39 isoform X1 [Xiphophorus hellerii]
g6451.t1	Ccdc73	coiled-coil domain-containing protein 73 [Fundulus heteroclitus]
g2969.t1	CCDC88A	girdin-like [Fundulus heteroclitus]
g10432.t1	ccdc89	coiled-coil domain-containing protein 89 [Fundulus heteroclitus]
g15433.t1	ccna1	cyclin-A1 [Xiphophorus maculatus]
g616.t1	CCND2	PREDICTED: G1/S-specific cyclin-D3 [Poecilia mexicana]
g13900.t1	Cd48	PREDICTED: CD48 antigen-like [Cyprinodon variegatus]
g1403.t1	CD53	leukocyte surface antigen CD53 [Fundulus heteroclitus]
g12614.t1	Cdc20	PREDICTED: cell division cycle protein 20 homolog [Poecilia mexicana]
g5414.t1	Cdkl1	PREDICTED: cyclin-dependent kinase-like 1 isoform X1 [Cyprinodon variegatus]
g14502.t1	CEP55	PREDICTED: centrosomal protein of 55 kDa-like isoform X3 [Poecilia mexicana]
g15808.t1	Cfap100	cilia- and flagella-associated protein 100-like [Fundulus heteroclitus]
g6199.t1	cfap161	PREDICTED: uncharacterized protein C15orf26 homolog [Cyprinodon variegatus]
g23606.t1	CFAP47	cilia- and flagella-associated protein 47 [Fundulus heteroclitus]
g2529.t1	Cfap52	cilia- and flagella-associated protein 52 [Fundulus heteroclitus]
g20767.t1	CFAP61	PREDICTED: cilia- and flagella-associated protein 61 isoform X1 [Poecilia mexicana]
g1079.t1	Chia	acidic mammalian chitinase [Fundulus heteroclitus]
g6527.t1	CHMP4B	charged multivesicular body protein 4b-like [Fundulus heteroclitus]
g13759.t1	CIDEB	PREDICTED: cell death activator CIDE-B [Poecilia reticulata]
g19747.t1	CIITA	MHC class II transactivator isoform X1 [Xiphophorus maculatus]
g2139.t1	CKAP2L	cytoskeleton-associated protein 2-like [Fundulus heteroclitus]
g8264.t1	CKS1B	cyclin-dependent kinases regulatory subunit 1 [Fundulus heteroclitus]
g19650.t1	COG1	conserved oligomeric Golgi complex subunit 1 isoform X1 [Xiphophorus maculatus]
g16526.t1	Col5a1	PREDICTED: collagen alpha-1(V) chain-like [Poecilia reticulata]
g23550.t1	cpo	PREDICTED: carboxypeptidase O [Cyprinodon variegatus]
g18231.t1	CSTA	cystatin-A-like isoform X1 [Xiphophorus maculatus]
g13792.t1	CXCL5	PREDICTED: alveolar macrophage chemotactic factor-like [Cyprinodon variegatus]
g13293.t1	cyb5d1	PREDICTED: cytochrome b5 domain-containing protein 1 [Poecilia mexicana]
g6468.t1	cyb5r2	PREDICTED: NADH-cytochrome b5 reductase 2-like [Poecilia mexicana]
g11488.t1	CYP11B	cytochrome P450 11B, mitochondrial [Xiphophorus maculatus]
g18665.t1	Dcdc2	doublecortin domain-containing protein 2C [Fundulus heteroclitus]
g11984.t1	DCST1	DC-STAMP domain-containing protein 1 isoform X1 [Fundulus heteroclitus]
g11983.t1	DCST2	DC-STAMP domain-containing protein 2 [Fundulus heteroclitus]
g9704.t1	DDX19A	PREDICTED: ATP-dependent RNA helicase DDX19B-like isoform X2 [Poecilia latipinna]
g13738.t1	DHRS11	dehydrogenase/reductase SDR family member 11-like [Fundulus heteroclitus]
g5170.t1	DHRS11	dehydrogenase/reductase SDR family member 11-like [Fundulus heteroclitus]
g5171.t1	DHRS11	dehydrogenase/reductase SDR family member 11-like [Fundulus heteroclitus]
g13737.t1	DHRS11	dehydrogenase/reductase SDR family member 11-like [Fundulus heteroclitus]
g5169.t1	DHRS11	dehydrogenase/reductase SDR family member 11-like [Fundulus heteroclitus]
g21706.t1	Dmc1	meiotic recombination protein DMC1/LIM15 homolog [Xiphophorus maculatus]
g23734.t1	dmrt1	doublesex- and mab-3-related transcription factor 1-like isoform X1 [Archocentrus centrarchus]
g21814.t1	dnaaf3	dynein assembly factor 3, axonemal isoform X1 [Fundulus heteroclitus]
g13105.t1	DNAH17	PREDICTED: dynein heavy chain 17, axonemal-like isoform X3 [Poecilia latipinna]
g13504.t1	Dnah2	dynein heavy chain 2, axonemal [Fundulus heteroclitus]
g10789.t1	DNAH7	PREDICTED: dynein heavy chain 7, axonemal [Poecilia mexicana]
g7893.t1	Dnah8	dynein heavy chain 8, axonemal [Xiphophorus hellerii]
g11284.t1	drc1	dynein regulatory complex protein 1 isoform X1 [Fundulus heteroclitus]
g20113.t1	DRC3	dynein regulatory complex subunit 3 [Fundulus heteroclitus]
g1593.t1	Dusp2	dual specificity protein phosphatase 2-like [Xiphophorus maculatus]
g51.t1	DYNLRB2	PREDICTED: dynein light chain roadblock-type 1-like [Poecilia latipinna]
g12812.t1	E2F5	transcription factor E2F5-like [Xiphophorus maculatus]
g11105.t1	EDN2	PREDICTED: endothelin-2-like [Poecilia mexicana]
g13409.t1	EDNRA	endothelin-1 receptor-like isoform X1 [Seriola dumerili]
g4196.t1	Efcab2	EF-hand calcium-binding domain-containing protein 2 [Fundulus heteroclitus]
g4192.t1	Efcab2	EF-hand calcium-binding domain-containing protein 2 [Fundulus heteroclitus]
g21131.t1	EFHC1	EF-hand domain-containing protein 1 [Fundulus heteroclitus]
g10038.t1	efhc2	PREDICTED: EF-hand domain-containing family member C2 isoform X1 [Lates calcarifer]
g14892.t1	eif3l	eukaryotic translation initiation factor 3 subunit L [Perca flavescens]
g18418.t1	ENKUR	enkurin [Fundulus heteroclitus]
g10408.t1	ERICH6	uncharacterized protein LOC105933608 isoform X2 [Fundulus heteroclitus]
g10407.t1	ERICH6B	glutamate-rich protein 6-like [Fundulus heteroclitus]
g2042.t1	es1	ES1 protein, mitochondrial-like [Fundulus heteroclitus]
g20968.t1	esco2	PREDICTED: N-acetyltransferase ESCO2 isoform X1 [Cyprinodon variegatus]
g11956.t1	ETS1	protein c-ets-2-A-like isoform X2 [Fundulus heteroclitus]
g18903.t1	exd1	piRNA biogenesis protein EXD1 isoform X2 [Xiphophorus maculatus]
g23260.t1	F2	PREDICTED: prothrombin [Poecilia reticulata]
g4925.t1	FAM124B	PREDICTED: protein FAM124B [Poecilia reticulata]
g17488.t1	fam166b	PREDICTED: protein FAM166B [Poecilia latipinna]
g9798.t1	FAM187A	Ig-like V-type domain-containing protein FAM187A [Fundulus heteroclitus]
g21313.t1	Fam228b	protein FAM228B [Fundulus heteroclitus]
g1745.t1	family	C2 calcium-dependent domain-containing protein 4C-like [Xiphophorus couchianus]
g23767.t1	farsa	phenylalanine--tRNA ligase alpha subunit [Fundulus heteroclitus]
g18140.t1	FBXO15	PREDICTED: F-box only protein 15 [Cyprinodon variegatus]
g12167.t1	FBXO36	F-box only protein 36-like [Fundulus heteroclitus]
g20056.t1	FBXW9	F-box/WD repeat-containing protein 9 [Fundulus heteroclitus]
g15288.t1	fgf1	putative fibroblast growth factor 1 isoform X1 [Fundulus heteroclitus]
g3528.t1	FGL1	fibrinogen-like protein 1 isoform X2 [Fundulus heteroclitus]
g19771.t1	FLII	PREDICTED: protein flightless-1 homolog isoform X1 [Cyprinodon variegatus]
g21252.t1	FOS	proto-oncogene c-Fos-like isoform X2 [Xiphophorus hellerii]
g23053.t1	Foxm1	forkhead box protein M1 isoform X1 [Fundulus heteroclitus]
g13941.t1	frrs1	PREDICTED: putative ferric-chelate reductase 1 isoform X1 [Cyprinodon variegatus]
g18916.t1	fsip1	fibrous sheath-interacting protein 1 isoform X1 [Xiphophorus hellerii]
g7079.t1	GABRA6	gamma-aminobutyric acid receptor subunit alpha-4-like [Fundulus heteroclitus]
g8589.t1	GABRB3	PREDICTED: gamma-aminobutyric acid receptor subunit beta-3-like isoform X1 [Poecilia mexicana]
g5582.t1	Gas8	growth arrest-specific protein 8-like isoform X2 [Fundulus heteroclitus]
g10122.t1	GJB6	PREDICTED: gap junction beta-2 protein-like [Cyprinodon variegatus]
g21940.t1	GJC1	gap junction gamma-1 protein-like [Xiphophorus maculatus]
g157.t1	gpd1	glycerol-3-phosphate dehydrogenase [NAD(+)], cytoplasmic-like [Fundulus heteroclitus]
g6978.t1	GPR151	PREDICTED: probable G-protein coupled receptor 151 [Poecilia formosa]
g11569.t1	H1-1	histone H1.3-like [Xiphophorus maculatus]
g12152.t1	HFM1	PREDICTED: probable ATP-dependent DNA helicase HFM1 isoform X1 [Poecilia formosa]
g17240.t1	HIPK1	homeodomain-interacting protein kinase 2-like [Fundulus heteroclitus]
g22884.t1	Hipk1	homeodomain-interacting protein kinase 1-like [Xiphophorus hellerii]
g12254.t1	Hormad1	HORMA domain-containing protein 1-like [Fundulus heteroclitus]
g11840.t1	hormad1	HORMA domain-containing protein 1 [Fundulus heteroclitus]
g15566.t1	HSF5	PREDICTED: heat shock factor protein 5 isoform X1 [Poecilia reticulata]
g22465.t1	htra1b	serine protease HTRA1 [Fundulus heteroclitus]
g6436.t1	HYDIN	hydrocephalus-inducing protein homolog [Fundulus heteroclitus]
g1548.t1	IL12B	interleukin-12 subunit beta-like [Fundulus heteroclitus]
g23766.t1	ilf3	PREDICTED: interleukin enhancer-binding factor 3 isoform X2 [Cyprinodon variegatus]
g6089.t1	iqch	IQ domain-containing protein H [Fundulus heteroclitus]
g5739.t1	IQUB	IQ and ubiquitin-like domain-containing protein isoform X1 [Fundulus heteroclitus]
g1594.t1	Izumo1	izumo sperm-egg fusion protein 1 [Fundulus heteroclitus]
g23733.t1	KANK1	PREDICTED: KN motif and ankyrin repeat domain-containing protein 1 [Cyprinodon variegatus]
g10599.t1	KANSL1L	PREDICTED: KAT8 regulatory NSL complex subunit 1-like protein isoform X1 [Poecilia reticulata]
g1010.t1	kfh-r	red-sensitive opsin [Fundulus heteroclitus]
g1011.t1	kfh-r	red-sensitive opsin [Fundulus heteroclitus]
g14904.t1	Kif20b	kinesin-like protein KIF20B isoform X1 [Kryptolebias marmoratus]
g16501.t1	kifc1.L	kinesin-like protein KIFC1 [Fundulus heteroclitus]
g19045.t1	KLHL10	kelch-like protein 10 [Xiphophorus hellerii]
g982.t1	Klhl10	PREDICTED: kelch-like protein 10 [Poecilia mexicana]
g14230.t1	Klhl10	PREDICTED: kelch-like protein 10 [Poecilia latipinna]
g9068.t1	KLHL10	kelch-like protein 10 [Fundulus heteroclitus]
g20696.t1	krt13	keratin, type I cytoskeletal 13-like [Xiphophorus maculatus]
g2994.t1	krt18	PREDICTED: keratin, type I cytoskeletal 50 kDa-like [Cyprinodon variegatus]
g18479.t1	LARP4B	PREDICTED: uncharacterized protein LOC106954862 isoform X2 [Poecilia latipinna]
g12853.t1	LARP6	LOW QUALITY PROTEIN: la-related protein 6-like [Xiphophorus hellerii]
g16381.t1	LOC373482	tektin-5-like [Fundulus heteroclitus]
g14581.t1	Lrrc18	leucine-rich repeat-containing protein 18 [Fundulus heteroclitus]
g18506.t1	Lrrc34	leucine-rich repeat-containing protein 34 [Fundulus heteroclitus]
g1759.t1	LRRC43	leucine-rich repeat-containing protein 43 isoform X2 [Fundulus heteroclitus]
g21904.t1	LRRC51	PREDICTED: leucine-rich repeat-containing protein 51-like [Poecilia mexicana]
g11069.t1	MAG	myeloid cell surface antigen CD33-like isoform X2 [Xiphophorus maculatus]
g21680.t1	MEIOB	PREDICTED: meiosis-specific with OB domain-containing protein [Nothobranchius furzeri]
g20424.t1	Meioc	PREDICTED: uncharacterized protein C17orf104 homolog isoform X1 [Poecilia latipinna]
g5051.t1	MLF1	myeloid leukemia factor 1 isoform X1 [Fundulus heteroclitus]
g1588.t1	mns1	PREDICTED: meiosis-specific nuclear structural protein 1 [Hippocampus comes]
g17572.t1	mov10b.2	putative helicase mov-10-B.1 [Fundulus heteroclitus]
g21301.t1	mtfr2	PREDICTED: mitochondrial fission regulator 2 isoform X1 [Poecilia latipinna]
g6048.t1	Muc2	mucin-2-like isoform X2 [Xiphophorus maculatus]
g18222.t1	MYBL1	myb-related protein A isoform X1 [Xiphophorus maculatus]
g13113.t1	MYBL1	transcriptional activator Myb-like [Xiphophorus maculatus]
g10752.t1	MYLK	myosin light chain kinase, smooth muscle isoform X2 [Xiphophorus maculatus]
g14185.t1	NCAPD3	PREDICTED: condensin-2 complex subunit D3 isoform X2 [Poecilia latipinna]
g772.t1	nr4a1	probable nuclear hormone receptor HR38 [Fundulus heteroclitus]
g9661.t1	nr4a1	probable nuclear hormone receptor HR38 [Fundulus heteroclitus]
g6350.t1	odf3	PREDICTED: outer dense fiber protein 3-like [Poecilia reticulata]
g23201.t1	opn1sw1	PREDICTED: LOW QUALITY PROTEIN: short-wave-sensitive opsin 1 [Poecilia mexicana]
g16485.t1	OSCP1	protein OSCP1-like isoform X1 [Fundulus heteroclitus]
g6467.t1	OVCH2	ovochymase-2-like [Fundulus heteroclitus]
g393.t1	Pacrg	PREDICTED: parkin coregulated gene protein [Poecilia mexicana]
g19006.t1	Pax1	PREDICTED: paired box protein Pax-1 [Cyprinodon variegatus]
g20967.t1	pbk	PREDICTED: lymphokine-activated killer T-cell-originated protein kinase [Cyprinodon variegatus]
g13510.t1	Pced1a	PREDICTED: PC-esterase domain-containing protein 1A-like isoform X1 [Poecilia reticulata]
g19874.t1	PDE6H	PREDICTED: retinal cone rhodopsin-sensitive cGMP 3',5'-cyclic phosphodiesterase subunit gamma-like [Poecilia mexicana]
g17915.t1	PIM1	PREDICTED: serine/threonine-protein kinase pim-1-like [Poecilia reticulata]
g17962.t1	PIM2	PREDICTED: serine/threonine-protein kinase pim-1-like [Poecilia latipinna]
g1425.t1	piwil1	piwi-like protein 1 [Xiphophorus maculatus]
g5966.t1	PLCZ1	1-phosphatidylinositol 4,5-bisphosphate phosphodiesterase zeta-1 isoform X1 [Fundulus heteroclitus]
g18773.t1	plk4	PREDICTED: serine/threonine-protein kinase PLK4 isoform X1 [Cyprinodon variegatus]
g19804.t1	PLPPR2	phospholipid phosphatase-related protein type 5-like isoform X1 [Xiphophorus hellerii]
g13771.t1	Poln	PREDICTED: DNA polymerase nu isoform X1 [Poecilia mexicana]
g6063.t1	PPP1R32	protein phosphatase 1 regulatory subunit 32-like [Fundulus heteroclitus]
g18226.t1	ppp1r42	protein phosphatase 1 regulatory subunit 42 [Fundulus heteroclitus]
g4582.t1	PRC1	PREDICTED: protein regulator of cytokinesis 1 isoform X2 [Cyprinodon variegatus]
g4687.t1	PRSS16	PREDICTED: thymus-specific serine protease-like, partial [Poecilia reticulata]
g5396.t1	RAB1A	ras-related protein Rab-1B [Fundulus heteroclitus]
g19706.t1	RABEP2	PREDICTED: rab GTPase-binding effector protein 2 [Poecilia reticulata]
g20594.t1	RADIL	PREDICTED: ras-associating and dilute domain-containing protein-like [Cyprinodon variegatus]
g6.t1	RALGAPB	ral GTPase-activating protein subunit beta-like [Fundulus heteroclitus]
g12227.t1	RGS5	PREDICTED: regulator of G-protein signaling 5-like isoform X1 [Poecilia reticulata]
g9440.t1	rho	rhodopsin [Salarias fasciatus]
g12122.t1	RLN3	PREDICTED: relaxin-3-like [Poecilia mexicana]
g18084.t1	ropn1l	ropporin-1-like protein isoform X2 [Fundulus heteroclitus]
g21082.t1	RSPH3	radial spoke head protein 3 homolog isoform X2 [Fundulus heteroclitus]
g8698.t1	Rsph4a	PREDICTED: radial spoke head protein 4 homolog A isoform X2 [Poecilia reticulata]
g21328.t1	rsph9	radial spoke head protein 9 homolog [Fundulus heteroclitus]
g2884.t1	RTN4RL2	reticulon-4 receptor-like 2 [Fundulus heteroclitus]
g19040.t1	S100PBP	S100P-binding protein [Xiphophorus maculatus]
g18621.t1	sema4e	semaphorin-4E-like isoform X1 [Fundulus heteroclitus]
g8410.t1	sema4e	semaphorin-4E-like [Xiphophorus couchianus]
g20634.t1	si:dkey-27p23.3	UPF0722 protein C11orf88 homolog [Fundulus heteroclitus]
g18042.t1	Siglec10	myelin-associated glycoprotein-like [Xiphophorus maculatus]
g11403.t1	sim1a	single-minded homolog 1-A-like [Fundulus heteroclitus]
g4375.t1	Slc22a18	solute carrier family 22 member 18 isoform X1 [Fundulus heteroclitus]
g21440.t1	Slc23a1	solute carrier family 23 member 1-like isoform X1 [Xiphophorus maculatus]
g4373.t1	SLC24A2	sodium/potassium/calcium exchanger 1-like isoform X2 [Fundulus heteroclitus]
g15743.t1	SLC25A15	mitochondrial ornithine transporter 1-like [Fundulus heteroclitus]
g219.t1	SLC2A1	PREDICTED: solute carrier family 2, facilitated glucose transporter member 1-like [Poecilia mexicana]
g16793.t1	slc44a4	choline transporter-like protein 4 [Fundulus heteroclitus]
g22774.t1	slc5a8	sodium-coupled monocarboxylate transporter 1 [Fundulus heteroclitus]
g7005.t1	slc7a2	PREDICTED: cationic amino acid transporter 2-like [Cyprinodon variegatus]
g5649.t1	Smc1b	structural maintenance of chromosomes protein 1B-like [Fundulus heteroclitus]
g7786.t1	Smn1	PREDICTED: survival motor neuron protein-like isoform X1 [Poecilia formosa]
g15343.t1	Sox30	transcription factor SOX-30-like [Fundulus heteroclitus]
g18106.t1	SPAG6	sperm-associated antigen 6 [Fundulus heteroclitus]
g17683.t1	SPAG8	sperm-associated antigen 8 [Fundulus heteroclitus]
g5735.t1	SPAM1	hyaluronidase PH-20 [Fundulus heteroclitus]
g4208.t1	SPATA17	spermatogenesis-associated protein 17 [Fundulus heteroclitus]
g15605.t1	SPATA22	spermatogenesis-associated protein 22 [Xiphophorus hellerii]
g7633.t1	SPATA4	PREDICTED: spermatogenesis-associated protein 4 isoform X2 [Lates calcarifer]
g19120.t1	SPATA7	spermatogenesis-associated protein 7 [Fundulus heteroclitus]
g10988.t1	SPATC1L	speriolin-like protein [Fundulus heteroclitus]
g14600.t1	spef1	sperm flagellar protein 1 [Fundulus heteroclitus]
g9489.t1	SPO11	meiotic recombination protein SPO11 [Fundulus heteroclitus]
g7409.t1	STAG1	PREDICTED: cohesin subunit SA-3 isoform X1 [Poecilia reticulata]
g21534.t1	Stk35	PREDICTED: serine/threonine-protein kinase pdik1l-B-like [Cyprinodon variegatus]
g16380.t1	Stmnd1	PREDICTED: uncharacterized protein LOC106949307 [Poecilia latipinna]
g11072.t1	Sun1	SUN domain-containing protein 3-like [Xiphophorus couchianus]
g7906.t1	Swt1	transcriptional protein SWT1 [Fundulus heteroclitus]
g178.t1	Sycp1	synaptonemal complex protein 1 [Fundulus heteroclitus]
g9130.t1	SYCP2	PREDICTED: synaptonemal complex protein 2 [Poecilia latipinna]
g6570.t1	SYCP3	synaptonemal complex protein 3 [Fundulus heteroclitus]
g4757.t1	tcaf	TRPM8 channel-associated factor homolog [Fundulus heteroclitus]
g9503.t1	TCFL5	transcription factor-like 5 protein [Fundulus heteroclitus]
g21070.t1	Tcte1	T-complex-associated testis-expressed protein 1 [Fundulus heteroclitus]
g12235.t1	tctex1d1-b	tctex1 domain-containing protein 1-B [Fundulus heteroclitus]
g7949.t1	tdrd5	PREDICTED: tudor domain-containing protein 5 isoform X1 [Poecilia latipinna]
g21504.t1	tdrd6	PREDICTED: tudor domain-containing protein 6-like isoform X2 [Poecilia mexicana]
g18761.t1	tdrd9	ATP-dependent RNA helicase TDRD9 [Xiphophorus maculatus]
g10101.t1	tent5c	putative nucleotidyltransferase FAM46C isoform X1 [Xiphophorus maculatus]
g4093.t1	Tex9	testis-expressed protein 9-like isoform X1 [Fundulus heteroclitus]
g4092.t1	TEX9	testis-expressed protein 9-like isoform X2 [Xiphophorus hellerii]
g317.t1	TGM5	PREDICTED: protein-glutamine gamma-glutamyltransferase 5-like [Cyprinodon variegatus]
g23056.t1	Tiparp	PREDICTED: TCDD-inducible poly [ADP-ribose] polymerase-like [Poecilia latipinna]
g13026.t1	TMCC2	transmembrane and coiled-coil domains protein 1-like [Fundulus heteroclitus]
g575.t1	TMCC3	transmembrane and coiled-coil domains protein 1-like [Fundulus heteroclitus]
g9680.t1	TMDD1	uncharacterized protein LOC105935173 [Fundulus heteroclitus]
g7654.t1	Tmed11	transmembrane emp24 domain-containing protein 11-like [Cottoperca gobio]
g9803.t1	Tmem81	PREDICTED: LOW QUALITY PROTEIN: transmembrane protein 81 [Cyprinodon variegatus]
g22294.t1	TOP2A	PREDICTED: DNA topoisomerase 2-alpha [Poecilia formosa]
g4444.t1	TPPP3	tubulin polymerization-promoting protein family member 3-like isoform X1 [Fundulus heteroclitus]
g4445.t1	TPPP3	tubulin polymerization-promoting protein family member 3-like isoform X1 [Fundulus heteroclitus]
g4456.t1	tppp3	PREDICTED: tubulin polymerization-promoting protein family member 3-like, partial [Cyprinodon variegatus]
g11772.t1	trp3	trypsinogen-like protein 3 [Fundulus heteroclitus]
g20250.t1	Tspan10	tetraspanin-10 [Fundulus heteroclitus]
g5043.t1	Ttc12	tetratricopeptide repeat protein 12 [Fundulus heteroclitus]
g2229.t1	TTC16	tetratricopeptide repeat protein 16 [Fundulus heteroclitus]
g13408.t1	TTC29	tetratricopeptide repeat protein 29 [Fundulus heteroclitus]
g8967.t1	Ttll10	inactive polyglycylase TTLL10 isoform X1 [Fundulus heteroclitus]
g956.t1	ttll3	tubulin monoglycylase TTLL3-like isoform X1 [Fundulus heteroclitus]
g18882.t1	Ttll5	tubulin polyglutamylase TTLL5 [Fundulus heteroclitus]
g22258.t1	ttll6	tubulin polyglutamylase TTLL6 isoform X3 [Fundulus heteroclitus]
g1824.t1	UBB	polyubiquitin-like [Xiphophorus couchianus]
g11.t1	ube2c	PREDICTED: ubiquitin-conjugating enzyme E2 C [Cyprinodon variegatus]
g22322.t1	ubtd1	PREDICTED: ubiquitin domain-containing protein 1 [Cyprinodon variegatus]
g9705.t1	ubxn10	PREDICTED: UBX domain-containing protein 10 [Poecilia reticulata]
g11215.t1	ULK4	serine/threonine-protein kinase ULK4 isoform X1 [Xiphophorus maculatus]
g20376.t1	USP31	PREDICTED: ubiquitin carboxyl-terminal hydrolase 31 [Poecilia formosa]
g12998.t1	VIPR2	vasoactive intestinal polypeptide receptor 2 [Fundulus heteroclitus]
g22754.t1	Wdr64	WD repeat-containing protein on Y chromosome-like [Fundulus heteroclitus]
g5809.t1	Wdr78	WD repeat-containing protein 78-like isoform X1 [Fundulus heteroclitus]
g18305.t1	WDR97	WD repeat-containing protein 97 isoform X1 [Xiphophorus couchianus]
g20443.t1	Zbed4	PREDICTED: zinc finger BED domain-containing protein 4-like [Nothobranchius furzeri]
g9116.t1	ZMYND12	zinc finger MYND domain-containing protein 12 [Fundulus heteroclitus]

## Sheet: S8
Supplemental Table S8. Genes with enhanced expression in trophotaenia
id	baseMean tr rest	logFC tr rest	p adj tr rest	GM F1 B DESeq2 norm	GM F3 B DESeq2 norm	GM F4 B DESeq2 norm	GM M1 B DESeq2 norm	GM M3 B DESeq2 norm	GM M4 B DESeq2 norm	GM LE 1 2 DESeq2 norm	GM LE 3 2 DESeq2 norm	GM LE 4 1 DESeq2 norm	GM EE 1 1 DESeq2 norm	GM EE 3 1 DESeq2 norm	GM EE 4 1 DESeq2 norm	GM EE R5 DESeq2 norm	GM F1 EM DESeq2 norm	GM F2 EM DESeq2 norm	GM F4 EM DESeq2 norm	GM F6 EM DESeq2 norm	GM F1 G DESeq2 norm	GM F3 G DESeq2 norm	GM F4 G DESeq2 norm	GM F2 OV DESeq2 norm	GM F1 OV DESeq2 norm	GM F4 OV DESeq2 norm	GM F6 OV DESeq2 norm	GM M1 G DESeq2 norm	GM M3 G DESeq2 norm	GM M4 G DESeq2 norm	GM T R6 DESeq2 norm	GM F1 TR DESeq2 norm	GM F2 TR DESeq2 norm	GM F6 TR DESeq2 norm	GM F1 TR 1 DESeq2 norm	symbol	description
g10082.t1	638.541	2.51972	1.20759e-14	154.223	143.431	128.784	124.565	161	187.105	227.748	191.266	188.535	235.538	147.384	137.251	250.455	249.948	241.591	259.497	176	388.466	303.824	435.206	568.31	461.999	553.496	672.622	140.36	496.316	136.156	1496.67	1566.23	1442.56	2477.46	2114.97	aad-a	alpha-aspartyl dipeptidase isoform X1 [Fundulus heteroclitus]
g10133.t1	332.301	2.42742	5.18286e-08	2.92829	8.49261	16.0979	24.9131	4	9.6363	34.44	50.9349	43.0604	33.8148	82.7775	296.929	110.072	44.0438	54.1684	60.9972	50	190.87	232.434	134.687	180.067	333.459	236.158	241.997	267.746	206.288	403.108	1361.62	798.401	693.276	1141.48	613.353	IL1RL1	interleukin-1 receptor-like 1 [Xiphophorus hellerii]
g10136.t1	1314.83	3.13649	2.30559e-23	254.761	196.274	168.134	129.179	144	236.892	288.852	440.743	391.035	274.017	306.882	287.958	388.444	328.126	336.927	338.069	248	654.17	526.296	585.045	870.472	978.023	828.398	1142.81	199.335	454.446	265.879	4343.83	3453.51	3949.25	4605.21	5258.24	IL1R1	interleukin-1 receptor type 1-like [Fundulus heteroclitus]
g1014.t1	6.54768	2.01741	0.00179001	0.976096	2.83087	2.68299	0.922707	5	7.22723	1.11097	1.03949	2.32759	2.33206	2.01896	2.6912	3.98813	2.20219	2.16674	1.03385	3	2.52251	2.49036	7.57612	2.63513	0.93145	0.922493	1.84028	14.154	9.19104	12.8651	41.7676	3.39745	4.54111	17.6821	11.6706	-	PREDICTED: uncharacterized protein LOC103147345 [Poecilia formosa]
g10147.t1	1516.84	2.25426	6.23455e-32	346.514	412.363	409.603	262.972	397	393.482	739.905	780.655	693.622	713.609	587.518	1085.45	522.445	957.952	925.196	1029.72	972	563.36	632.551	608.615	917.905	865.317	856.073	954.185	1121.7	886.425	1400.16	3935.9	3290.43	3779.72	4298.72	4722.69	HACD2	very-long-chain (3R)-3-hydroxyacyl-CoA dehydratase 2 [Poecilia reticulata]
g10154.t1	2574.3	2.42055	4.10867e-06	446.076	350.084	414.969	426.291	310	367.786	606.588	860.695	735.519	644.813	686.447	854.007	645.28	820.315	972.864	984.227	764	3066.53	1940.82	2059.86	2792.36	3102.66	2335.75	2523.02	149.796	197.097	242.293	7097.7	7776.77	7321.78	5204.43	8326.3	slc15a2	solute carrier family 15 member 2 isoform X1 [Fundulus heteroclitus]
g10178.t1	400.853	3.04191	2.16044e-05	36.1156	69.8281	62.6031	151.324	43	96.363	241.08	290.017	250.216	367.299	420.954	711.373	276.776	218.017	247.008	239.854	253	45.4051	34.865	40.406	68.5135	29.8064	30.4423	34.0452	5.8975	6.12736	20.3698	1676.27	1279.14	1238.21	1051.1	1218.93	fzd5	PREDICTED: frizzled-5 [Cyprinodon variegatus]
g1019.t1	1688.17	2.40892	2.34251e-15	834.562	777.546	623.348	788.915	629	725.132	1479.81	1822.22	2034.31	2266.76	1687.85	1835.4	853.46	1107.7	1184.12	1220.98	1207	735.731	867.475	602.723	546.351	575.636	511.061	768.317	556.724	255.307	537.119	5369.92	3861.2	3369.5	5611.12	5085.77	comtb	catechol O-methyltransferase [Xiphophorus couchianus]
g10225.t1	3127.98	3.60627	2.65235e-65	1466.1	1261.62	1024.01	1420.05	1099	1096.13	1334.27	1567.55	1367.46	1239.49	1382.99	1055.85	1342.41	1128.62	1256.71	1237.52	1212	890.445	565.312	561.475	801.959	986.406	702.939	778.438	622.776	408.491	1081.74	11146.4	11366.2	9999.52	11913.8	11587.6	LMO7	PREDICTED: LIM domain only protein 7 isoform X1 [Cyprinodon variegatus]
g10233.t1	1917.38	4.33505	1.45449e-05	2.92829	7.54899	7.15464	40.5991	2	2.40908	973.208	770.26	1009.01	930.49	757.111	393.812	355.741	1185.88	1483.13	1110.36	817	7.56752	1.66024	1.68358	118.581	3.7258	184.499	39.566	4.718	2.04245	70.7583	3658.84	7625.58	9734.62	6986.4	9809.76	Scel	sciellin isoform X4 [Fundulus heteroclitus]
g10239.t1	400.763	2.50267	5.64067e-05	51.7331	87.757	87.6443	151.324	144	118.045	651.027	1172.54	1567.63	502.558	599.632	607.314	604.601	207.006	270.842	212.973	196	31.9517	42.3361	49.6657	36.0135	27.9435	122.692	19.3229	195.797	51.0613	156.526	957.87	924.107	1466.78	882.141	1449.74	mid1ip1a	PREDICTED: mid1-interacting protein 1-B-like [Poecilia mexicana]
g10249.t1	579.979	3.72611	1.31301e-39	23.4263	54.7302	35.7732	35.9856	39	114.03	165.534	235.964	218.794	181.9	180.697	233.237	164.311	201.5	218.84	204.703	159	106.786	115.387	157.415	182.703	104.322	136.529	226.354	21.231	235.903	69.6862	2371.01	1773.47	1872.45	2206.33	2336.71	TMEM30A	cell cycle control protein 50A-like [Xiphophorus couchianus]
g10251.t1	329.079	3.0679	2.65727e-10	222.55	201.935	244.152	119.952	203	158.196	186.643	174.634	152.457	190.063	174.64	106.751	74.1793	301.7	327.177	282.241	287	53.8135	78.0313	91.7552	82.5675	116.431	140.219	66.2501	24.7695	22.467	39.6675	1120.76	811.991	1451.64	1182.74	766.367	Filip1l	PREDICTED: filamin A-interacting protein 1-like [Poecilia latipinna]
g10272.t1	5437.14	5.90581	4.60116e-11	81.016	40.5758	44.7165	95.9615	44	32.924	473.272	681.904	471.337	885.015	758.121	881.816	206.585	999.794	1280.54	1000.77	1271	17.6575	9.13132	8.41791	341.689	12.1089	75.6444	43.2466	10.6155	14.2972	43.9559	19093.4	19574.4	22988.6	34047.9	23242.6	KIAA1211L	PREDICTED: uncharacterized protein KIAA1211-like homolog [Cyprinodon variegatus]
g10276.t1	989.077	4.7866	4.36435e-18	45.8765	18.8725	23.2526	18.4541	34	26.4998	316.626	380.452	391.035	441.925	304.863	531.063	121.239	291.79	320.677	263.632	219	62.2218	26.5638	32.8299	83.4459	23.2863	39.6672	65.3299	33.026	104.165	28.9466	4843.65	3446.72	3345.28	4497.15	4128.79	IUNH	inosine-uridine preferring nucleoside hydrolase-like isoform X1 [Xiphophorus maculatus]
g10279.t1	38.0828	2.19085	0.000128238	0.976096	7.54899	2.68299	10.1498	6	0.803025	37.7729	58.2113	60.5174	38.4789	28.2655	51.1328	74.1793	16.5164	21.6674	51.6926	29	26.9067	14.112	11.7851	3.51351	2.79435	10.1474	7.36112	11.795	4.08491	8.57676	43.1598	120.61	54.4933	133.598	143.937	SLC9A2	sodium/hydrogen exchanger 2 [Fundulus heteroclitus]
g10295.t1	46.8959	2.91826	0.000240261	0.976096	10.3799	0.89433	6.45895	7	6.4242	55.5484	75.8826	58.1898	74.6258	43.4077	33.1914	6.38101	48.4482	62.8353	76.505	41	4.20418	3.32048	4.20896	7.02702	5.5887	4.61246	2.76042	2.359	1.02123	1.07209	100.242	220.834	178.617	56.9757	182.839	LEC	brevican core protein-like [Xiphophorus maculatus]
g10304.t1	106.771	4.12661	1.12453e-08	0.976096	3.77449	2.68299	0.922707	3	0.803025	24.4413	47.8164	24.4397	17.4904	33.3129	97.7802	19.143	46.246	61.752	46.5233	62	3.36334	6.64096	6.73433	12.2973	1.8629	1.84499	5.52084	2.359	2.04245	4.28838	857.628	287.085	343.611	265.232	287.874	GPA33	cell surface A33 antigen [Fundulus heteroclitus]
g10306.t1	855.65	3.12841	1.13289e-25	19.5219	13.2107	40.2448	45.2127	23	17.6666	279.964	314.965	361.94	381.291	328.081	491.592	178.668	292.891	297.926	291.546	232	533.09	560.331	496.657	326.756	346.5	329.33	452.709	150.976	59.2311	165.103	3576.7	2396.9	2299.31	3135.63	2627.17	ILDR1	immunoglobulin-like domain-containing receptor 1 isoform X2 [Fundulus heteroclitus]
g10312.t1	2139.05	2.5399	9.83395e-16	1444.62	1556.03	1368.32	1317.63	1286	1552.25	1116.52	997.908	1098.62	1187.02	961.026	679.976	734.614	1016.31	1150.54	1196.17	1019	828.223	835.101	833.373	698.31	570.048	587.628	679.983	2402.64	1555.33	2774.58	8743.35	3538.45	3688.89	8165.21	6373.43	MPC2	mitochondrial pyruvate carrier 2 [Fundulus heteroclitus]
g10328.t1	692.642	4.63425	3.89956e-35	28.3068	19.8161	33.0902	21.2223	25	15.2575	123.317	101.87	123.362	62.9655	64.6068	25.1179	79.7626	124.424	106.17	165.416	75	51.291	42.3361	41.2478	135.27	136.923	228.778	248.438	68.411	175.651	96.4885	1669.31	1797.25	2164.6	4253.53	4128.79	-	uncharacterized protein LOC108232459 [Kryptolebias marmoratus]
g10347.t1	8143.85	5.82881	1.69299e-10	4.88048	2.83087	8.04897	6.45895	2	5.62118	1268.73	1244.27	981.079	1489.02	1783.75	2754.89	599.017	1088.98	1365.04	1303.69	1234	124.444	7.47108	7.57612	252.094	28.875	136.529	83.7327	15.3335	12.2547	20.3698	44911.3	25717	23232.3	46889	36407	PDZK1	Na(+)/H(+) exchange regulatory cofactor NHE-RF3 isoform X1 [Fundulus heteroclitus]
g10358.t1	164.263	2.44751	0.000110704	36.1156	18.8725	27.7242	41.5218	29	30.515	79.9897	134.094	145.474	127.097	140.318	87.0154	106.882	234.533	238.341	172.653	174	46.2459	14.112	10.9433	72.9053	55.887	51.6596	51.5278	4.718	11.2335	11.793	226.937	538.496	519.2	599.227	418.844	Gpr156	probable G-protein coupled receptor 156 isoform X1 [Fundulus heteroclitus]
g10007.t1	220.432	3.58066	2.15898e-05	34.1634	28.3087	34.8789	23.0677	10	13.6514	123.317	139.291	124.526	83.954	164.545	178.516	146.763	128.828	134.338	131.299	159	4.20418	1.66024	0.841791	26.3513	1.8629	9.22493	8.28126	4.718	5.10613	19.2977	1162.53	733.85	564.611	754.437	706.718	Satb2	PREDICTED: DNA-binding protein SATB2 isoform X4 [Poecilia formosa]
g10400.t1	4325.01	2.07383	3.30664e-06	637.391	545.414	1045.47	479.808	1418	960.418	3929.49	3023.87	5774.75	2645.72	1872.59	949.096	2073.83	1990.78	2217.65	2571.19	1725	3122.02	2879.69	3116.31	3035.67	3045.84	4731.46	5426.99	254.772	1760.59	455.64	4548.49	9200.3	11346.7	11127.9	17889.7	-	PREDICTED: thymosin beta-12-like [Poecilia reticulata]
g10462.t1	585.113	2.17055	1.2553e-15	344.562	390.66	332.691	306.339	313	269.816	293.295	380.452	288.621	255.36	355.337	348.959	542.386	209.208	203.673	208.838	174	533.93	444.944	497.499	424.256	530.927	387.447	437.987	171.027	307.389	212.275	1343.52	1518.66	1465.26	1585.5	1635.18	MAP3K20	PREDICTED: mitogen-activated protein kinase kinase kinase MLT [Poecilia reticulata]
g10472.t1	18423.6	2.19342	1.50496e-23	10009.9	11674.5	11252.5	9817.6	12129	13993.5	19729.7	18669.2	19971.9	21100.4	17398.4	17125	11112.5	11564.8	11787	12981	13651	8644.63	8620.79	9796.77	7464.45	6709.24	7136.4	6883.57	7365.98	12172	11705.1	64693.8	43922.3	31020.3	54620	44466.2	Atp5mc3	PREDICTED: ATP synthase F(0) complex subunit C3, mitochondrial [Cyprinodon variegatus]
g10479.t1	89.5866	3.26245	0.000302435	31.2351	30.1959	11.6263	28.6039	1	3.2121	48.8826	53.0138	51.207	46.6411	135.271	389.327	126.823	45.1449	46.5848	46.5233	62	2.52251	1.66024	0.841791	7.02702	0.93145	2.76748	4.6007	1.1795	3.06368	2.14419	310.472	310.867	329.987	271.126	289.171	hoxd4a	PREDICTED: homeobox protein Hox-D4 [Poecilia latipinna]
g10486.t1	1788.94	3.18322	3.55343e-18	137.63	198.161	159.191	83.0436	217	209.59	509.934	448.019	588.88	404.612	428.02	933.846	645.28	405.203	450.681	518.994	433	601.197	770.351	833.373	1191.96	770.309	1132.82	1179.62	80.206	790.429	113.642	4652.91	4454.06	5546.21	6868.52	8164.21	cyc	cytochrome c iso-1/iso-2 [Fundulus heteroclitus]
g10498.t1	690.761	4.81459	1.74545e-15	18.5458	27.3651	17.8866	24.9131	20	33.7271	259.966	203.739	250.216	271.685	165.555	93.2949	19.9407	310.509	318.51	287.411	232	26.9067	29.0542	15.994	61.4864	17.6976	25.8298	36.8056	43.6415	26.5519	33.2349	1500.85	3388.96	3298.36	1827.15	4227.34	Rdh7	PREDICTED: retinol dehydrogenase 7-like [Poecilia mexicana]
g10499.t1	1448.11	3.67179	3.10798e-105	100.538	118.897	107.32	98.7297	110	111.621	566.594	659.035	793.708	700.783	539.063	493.386	245.669	426.124	440.931	386.661	292	436.394	532.107	515.176	335.54	350.225	433.572	364.375	331.439	275.731	384.882	4364.71	5356.08	4919.53	5495.21	6075.18	Rdh7	retinol dehydrogenase 7-like [Xiphophorus hellerii]
g10503.t1	965.61	6.36594	5.57839e-16	35.1395	13.2107	23.2526	37.831	22	15.2575	68.88	89.3959	95.4312	75.7918	81.768	91.5007	21.5359	175.074	192.839	131.299	125	6.72668	3.32048	3.36717	41.2837	1.8629	11.0699	11.9618	4.718	3.06368	17.1535	2318.1	4071.85	4242.91	5787.94	5068.92	NOSTRIN	PREDICTED: nostrin [Cyprinodon variegatus]
g10511.t1	268.756	2.95688	8.62146e-77	106.394	76.4335	72.4407	93.1934	91	106.802	121.095	115.383	154.785	116.603	99.9387	116.619	102.096	96.8963	87.7528	88.9112	63	131.17	150.252	157.415	91.3513	96.8708	122.692	130.66	139.181	83.7406	115.786	1131.9	662.503	679.653	895.894	879.183	GALNT3	polypeptide N-acetylgalactosaminyltransferase 3 [Xiphophorus maculatus]
g10521.t1	750.508	2.12765	5.90949e-05	14.6414	21.7033	26.8299	9.22707	19	31.318	485.493	482.322	641.251	338.148	635.973	610.005	760.138	667.263	502.683	665.8	607	263.181	127.008	280.316	491.013	1091.66	751.832	169.306	122.668	54.125	31.0907	1901.82	1810.84	1701.4	1776.07	2350.97	DPP4	PREDICTED: dipeptidyl peptidase 4-like [Cyprinodon variegatus]
g10557.t1	1471.87	4.63707	3.80373e-87	56.6136	36.8013	63.4974	64.5895	47	49.7876	401.059	334.715	223.449	382.457	301.835	305.9	82.9531	235.634	274.092	242.955	297	351.469	323.747	244.119	184.459	177.907	216.786	238.316	287.798	123.568	122.219	6798.37	4839.67	4256.53	7057.13	6818.21	ehhadh	PREDICTED: peroxisomal bifunctional enzyme [Poecilia latipinna]
g10566.t1	681.459	2.1788	7.03941e-10	507.57	552.02	516.923	438.286	601	489.845	494.381	595.626	610.993	604.002	469.409	599.24	881.377	584.681	550.351	499.35	652	260.659	249.036	253.379	341.689	329.733	226.011	330.33	172.207	346.196	183.328	3436.08	1184.01	1053.54	1752.49	1331.74	PFKL	PREDICTED: ATP-dependent 6-phosphofructokinase, liver type-like [Cyprinodon variegatus]
g10583.t1	282.476	3.03715	1.578e-08	3.90439	0.943623	7.15464	10.1498	7	8.83328	111.097	134.094	89.6122	110.773	128.204	95.9861	74.1793	120.019	125.671	125.096	115	206.846	195.908	184.352	114.189	122.951	142.986	121.458	5.8975	1.02123	10.7209	1464.65	579.266	626.673	1055.03	809.159	ihhb	indian hedgehog B protein-like [Xiphophorus hellerii]
g10590.t1	270.506	2.07162	0.0103984	43.9243	48.1248	71.5464	65.5122	48	49.7876	344.4	381.492	428.277	356.805	252.37	80.7359	298.312	396.394	544.934	341.171	253	5.88585	14.112	5.05075	41.2837	10.246	50.7371	16.5625	60.1545	27.5731	174.751	140.617	682.888	1012.67	449.911	1102.22	ABCA12	PREDICTED: ATP-binding cassette sub-family A member 12 [Poecilia reticulata]
g10644.t1	160.304	4.02878	8.87067e-25	26.3546	19.8161	16.0979	6.45895	32	7.22723	89.9884	84.1985	94.2674	102.61	73.6921	69.0741	69.3935	56.1558	69.3355	41.3541	49	37.8376	30.7144	18.5194	14.9324	45.6411	7.37994	13.8021	10.6155	26.5519	11.793	661.32	599.65	514.659	524.569	744.323	Wnt6	PREDICTED: protein Wnt-6 [Poecilia latipinna]
g1067.t1	1588.09	5.35145	2.95719e-12	3.90439	3.77449	10.732	20.2996	4	1.60605	301.072	357.584	384.052	314.828	315.968	191.972	746.578	352.35	448.514	295.682	293	12.6125	5.81084	6.73433	62.3648	4.65725	47.9696	24.8438	37.744	43.9127	46.1001	4886.81	4698.68	7896.99	7954.98	8379.47	LAMB3	laminin subunit beta-3 [Fundulus heteroclitus]
g10694.t1	91.9951	2.95971	0.00290619	0.976096	0.943623	0.89433	0.922707	1	0.803025	71.1019	61.3297	37.2414	45.4751	53.5025	8.97066	3.19051	157.457	150.588	128.198	43	0.840835	2.49036	1.68358	21.0811	0.93145	1.84499	10.1215	1.1795	2.04245	1.07209	556.901	146.09	258.843	304.525	182.839	ACMSD	2-amino-3-carboxymuconate-6-semialdehyde decarboxylase [Fundulus heteroclitus]
g10701.t1	642.464	2.70868	1.2866e-30	402.152	351.972	358.626	375.542	366	334.058	289.963	329.517	236.25	257.692	293.759	280.782	206.585	339.137	373.762	320.494	300	190.029	192.588	181.827	217.838	199.33	270.29	202.431	542.57	378.875	573.571	2816.53	1499.98	1640.85	1469.58	2148.68	DDB_G0268948	putative methyltransferase DDB_G0268948 [Fundulus heteroclitus]
g10709.t1	252.396	3.18242	3.70988e-05	2.92829	4.71812	3.57732	26.7585	9	8.03025	392.172	275.464	558.622	299.669	179.688	43.9562	118.846	222.421	231.841	268.801	104	1.68167	9.96144	5.89254	16.6892	1.8629	17.5274	10.1215	51.898	51.0613	175.824	207.446	866.35	865.838	634.591	1626.1	Agr3	PREDICTED: anterior gradient protein 3-like [Poecilia mexicana]
g10734.t1	247.211	6.15705	9.4367e-18	2.92829	0.943623	0.89433	0.922707	1	0.803025	14.4426	7.27641	2.32759	6.99617	19.1801	1.79413	2.39288	25.3252	55.2518	50.6587	41	0.840835	1.66024	0.841791	7.02702	5.5887	11.0699	4.6007	25.949	7.14859	13.9372	243.644	667.599	1675.67	518.675	2348.38	Hspa12a	heat shock 70 kDa protein 12A-like isoform X4 [Xiphophorus hellerii]
g10738.t1	1.78864	2.06556	0.00221908	0.976096	0.943623	0.89433	0.922707	1	0.803025	1.11097	1.03949	1.1638	1.16603	1.00948	0.897066	0.797626	56.1558	1.08337	1.03385	1	0.840835	0.83012	0.841791	1.75676	1.8629	0.922493	0.92014	1.1795	1.02123	1.07209	1.39225	15.2885	3.02741	1.96468	1.29673	Hspa12a	heat shock 70 kDa protein 12A-like isoform X1 [Fundulus heteroclitus]
g10745.t1	23.8369	3.02512	5.00111e-06	1.95219	0.943623	8.04897	4.61354	35	0.803025	18.8865	23.9082	41.8966	22.1545	37.3508	13.456	21.5359	5.50547	21.6674	23.7786	14	2.52251	4.1506	3.36717	3.51351	0.93145	7.37994	3.68056	2.359	2.04245	1.07209	15.3148	57.7567	92.3359	72.6931	145.234	HSPA12A	heat shock 70 kDa protein 12A-like [Xiphophorus maculatus]
g10748.t1	61.7981	2.38232	0.00212213	3.90439	0.943623	8.9433	3.69083	6	4.01513	89.9884	50.9349	19.7845	46.6411	45.4267	6.27946	27.1193	37.4372	41.168	62.0311	23	5.04501	6.64096	9.2597	7.02702	0.93145	11.0699	12.882	74.3085	106.208	112.57	4.17676	161.379	187.699	80.5518	414.954	Hspa12a	PREDICTED: heat shock 70 kDa protein 12A-like [Poecilia latipinna]
g10755.t1	30.2717	3.65377	7.16156e-12	0.976096	0.943623	0.89433	0.922707	1	0.803025	9.99871	2.07897	5.81898	3.49808	3.02844	7.17653	5.58339	3.30328	7.58357	2.0677	5	3.36334	4.98072	2.52537	3.51351	7.4516	6.45745	5.52084	20.0515	5.10613	9.64885	109.988	96.8274	118.069	115.916	103.738	-	PREDICTED: myelin-oligodendrocyte glycoprotein-like [Poecilia formosa]
g10781.t1	456.21	6.19499	1.32317e-17	2.92829	1.88725	3.57732	0.922707	1	3.2121	44.4387	68.6061	48.8794	71.1277	61.5784	76.2506	6.38101	69.369	78.0025	51.6926	28	4.20418	0.83012	1.68358	14.054	2.79435	8.30243	2.76042	3.5385	3.06368	36.4512	1649.82	2573.57	2196.38	1764.28	1929.53	SLC10A2	ileal sodium/bile acid cotransporter-like [Fundulus heteroclitus]
g10788.t1	740.522	2.6572	1.52046e-20	35.1395	15.098	26.8299	45.2127	20	22.4847	324.403	273.385	328.19	255.36	283.664	191.972	289.538	338.036	349.928	320.494	234	470.027	357.782	345.134	348.716	805.705	529.511	567.726	213.489	90.8892	317.34	1240.5	2286.49	2795.81	1935.21	2699.79	esyt3	PREDICTED: extended synaptotagmin-3-like isoform X2 [Poecilia latipinna]
g10798.t1	3619.38	3.5142	1.42919e-10	394.343	308.565	338.057	308.184	273	239.302	1803.1	2370.03	2255.44	1725.72	2463.13	3655.54	2133.65	1216.71	1536.22	1382.26	1780	1222.57	735.486	742.46	559.527	665.056	561.798	991.911	159.232	74.5495	108.282	18629.7	10051.4	7267.29	15587.8	12110.2	Col18a1	collagen alpha-1(XVIII) chain isoform X1 [Fundulus heteroclitus]
g1085.t1	1110.29	4.869	3.88614e-26	1.95219	5.66174	6.26031	9.22707	1	5.62118	208.862	280.662	331.682	248.364	248.332	277.193	454.647	224.623	211.257	198.5	181	65.5852	122.028	119.534	111.554	95.9394	116.234	69.0105	14.154	16.3396	52.5326	3617.07	3828.93	5396.35	5041.37	5041.69	Elf3	ETS-related transcription factor Elf-3 [Fundulus heteroclitus]
g10869.t1	194.771	3.44545	1.02684e-14	37.0917	36.8013	37.5619	19.3769	11	32.924	87.7665	70.6851	51.207	71.1277	62.5878	97.7802	84.5484	171.771	157.088	116.825	97	42.8826	29.8843	31.9881	28.1081	29.8064	35.9772	34.0452	11.795	23.4882	15.0093	743.463	640.42	664.516	732.825	612.057	GK	glycerol kinase-like isoform X2 [Xiphophorus hellerii]
g10876.t1	88.0059	2.88009	1.99111e-06	26.3546	40.5758	36.6675	51.6716	58	49.7876	78.8787	63.4087	83.7933	80.4559	61.5784	130.075	120.442	49.5493	69.3355	57.8957	51	15.135	10.7916	9.2597	15.8108	13.9718	12.9149	13.8021	14.154	4.08491	3.21628	256.174	239.52	245.22	267.196	361.788	INHBB	inhibin beta B chain [Fundulus heteroclitus]
g10883.t1	3093.94	2.33868	5.92859e-30	1743.31	1875.92	1743.94	1620.27	1856	2039.68	2828.52	2481.26	2993.28	2585.08	2562.06	2957.63	1492.36	2019.41	2084.4	1991.2	2017	1333.56	1386.3	1437.78	1398.38	1184.8	1047.03	1384.81	1643.04	1517.54	1407.66	12892.3	6134.1	6822.26	8161.28	7764.82	Aldh2	aldehyde dehydrogenase, mitochondrial [Fundulus heteroclitus]
g10884.t1	47.8742	5.07481	6.81518e-29	11.7132	3.77449	3.57732	0.922707	5	9.6363	8.88774	3.11846	5.81898	3.49808	7.06637	8.07359	0.797626	13.2131	10.8337	10.3385	5	1.68167	0.83012	0.841791	4.39189	3.7258	11.9924	12.882	5.8975	3.06368	2.14419	68.2204	241.219	168.021	257.373	271.017	-	-
g10903.t1	14744.5	6.17905	8.93905e-37	1267.95	1084.22	784.327	1086.03	700	680.162	1543.13	2509.32	1220.82	2111.68	2532.79	4094.21	894.937	627.624	642.437	719.561	935	670.146	435.813	388.908	441.824	339.979	471.394	305.486	1254.99	535.123	692.573	136041	40650.5	29791.2	71363	45940.5	ABCB1	multidrug resistance protein 1 [Fundulus heteroclitus]
g10904.t1	848.248	4.03601	1.80065e-59	207.909	248.173	278.137	159.628	242	149.363	133.316	166.318	135	206.387	155.46	232.34	112.465	148.648	183.089	125.096	180	135.375	218.322	152.364	180.946	196.536	139.296	147.222	450.569	232.84	411.684	4375.85	3268.35	1854.29	3907.75	2710.17	CROT	peroxisomal carnitine O-octanoyltransferase isoform X1 [Fundulus heteroclitus]
g10905.t1	17834.6	6.39117	6.10493e-16	4161.1	4698.3	4231.97	4606.15	3998	5687.83	3057.38	2229.7	2637.16	2571.09	3568.52	4900.67	480.171	1120.91	1261.04	1505.29	1497	161.44	39.8458	38.7224	362.77	30.7379	172.506	46.9271	487.133	320.665	499.596	131768	46692.9	30772.1	103309	82040.2	-	PREDICTED: acyl-CoA-binding domain-containing protein 7 [Cyprinodon variegatus]
g10915.t1	575.464	2.62257	5.36195e-10	175.697	214.202	156.508	166.087	186	320.407	475.494	718.286	1098.62	399.948	346.252	169.545	451.457	436.033	498.349	350.476	469	70.6302	146.101	58.0836	158.108	88.4878	143.909	88.3334	501.287	258.37	515.678	1499.46	1620.58	1009.64	1984.33	2306.88	Sgk1	PREDICTED: serine/threonine-protein kinase Sgk1-like isoform X2 [Poecilia mexicana]
g10916.t1	2620.3	2.19442	2.54725e-18	1243.55	917.202	795.954	1061.11	921	866.464	1154.3	1213.08	1317.42	1276.8	1424.38	1208.35	1911.91	1151.74	814.693	923.23	773	2705.81	1966.55	2374.69	1507.3	2283.92	1797.02	1666.37	1743.3	919.104	1191.1	9052.43	5840.22	5346.4	7732.98	5985.71	PTPN3	PREDICTED: tyrosine-protein phosphatase non-receptor type 3 isoform X1 [Poecilia formosa]
g10917.t1	180.55	2.50276	7.23647e-06	2361.18	1444.69	1272.63	1586.13	1357	1009.4	177.755	197.503	182.716	221.545	168.583	71.7653	91.727	227.927	153.838	196.432	203	21.8617	20.753	22.7284	35.1351	26.0806	14.7599	25.7639	76.6675	33.7005	45.028	693.342	555.483	437.46	465.629	407.173	EPB41L4B	PREDICTED: band 4.1-like protein 4B isoform X2 [Poecilia formosa]
g10918.t1	243.537	3.26801	2.02147e-05	16.5936	6.60536	12.5206	14.7633	15	4.01513	245.524	228.687	308.406	228.541	184.735	125.589	203.395	230.129	253.508	215.041	126	5.88585	4.98072	5.89254	13.1757	2.79435	27.6748	11.9618	22.4105	11.2335	28.9466	607.022	976.768	1002.07	579.58	955.69	Esrp1	epithelial splicing regulatory protein 1 isoform X2 [Fundulus heteroclitus]
g10924.t1	12365.9	5.69037	1.55188e-10	25.3785	9.43623	75.1237	55.3624	17	4.81815	1713.11	3014.51	2112.29	1995.07	2073.47	3541.62	1320.87	2031.52	2848.17	2510.19	2445	97.5369	32.3747	21.0448	546.351	22.3548	188.188	187.709	18.872	15.3184	136.156	71082.8	35180.6	42059.8	68046.7	50878.5	CDH17	cadherin-17 [Fundulus heteroclitus]
g1094.t1	497.659	3.18756	0.000124041	381.654	448.221	284.397	461.354	376	421.588	387.728	307.688	288.621	397.616	421.963	556.181	76.5721	536.233	474.515	382.525	360	26.9067	9.96144	9.2597	67.6351	2.79435	11.0699	18.4028	35.385	13.2759	40.7396	2703.75	1454.11	1301.78	1161.13	1627.4	aldh1l1	PREDICTED: cytosolic 10-formyltetrahydrofolate dehydrogenase [Poecilia reticulata]
g10947.t1	89.7515	2.7992	6.67958e-13	53.6853	16.0416	33.9845	24.9131	57	37.7422	41.1058	35.3426	44.2242	45.4751	64.6068	49.3386	31.1074	50.6503	54.1684	50.6587	51	12.6125	14.112	15.994	24.5946	15.8347	32.2872	21.1632	46.0005	69.4434	105.065	299.334	295.578	222.514	231.832	321.589	Dennd3	DENN domain-containing protein 3-like isoform X1 [Fundulus heteroclitus]
g10950.t1	810.998	2.6331	3.15302e-09	373.845	356.69	303.178	377.387	295	388.664	251.079	179.831	228.104	249.53	260.446	418.033	268.002	319.317	340.177	287.411	330	411.169	414.23	401.534	816.013	658.535	710.319	909.098	29.4875	280.837	46.1001	2333.42	1865.2	2235.74	2937.19	2518.25	GLIPR2	Golgi-associated plant pathogenesis-related protein 1 [Fundulus heteroclitus]
g10954.t1	4.03081	2.50622	6.21962e-07	20.498	10.3799	16.9923	9.22707	10	12.0454	5.55484	1.03949	3.49139	1.16603	2.01896	1.79413	3.19051	5.50547	4.33347	3.10155	4	0.840835	0.83012	0.841791	1.75676	0.93145	0.922493	0.92014	1.1795	2.04245	2.14419	25.0605	10.1924	9.08222	3.92936	7.78038	STEAP4	PREDICTED: metalloreductase STEAP4-like [Poecilia formosa]
g10969.t1	684.103	3.14517	5.15438e-23	46.8526	72.659	65.2861	102.42	52	57.0148	397.726	502.072	556.294	403.446	485.561	569.637	467.409	290.689	327.177	324.629	305	168.167	200.889	187.719	185.338	191.879	212.173	185.868	117.95	121.526	230.5	2300	1768.37	2229.68	2485.32	2479.35	NGFR	PREDICTED: tumor necrosis factor receptor superfamily member 16-like isoform X1 [Poecilia reticulata]
g11003.t1	151.606	2.36859	0.000184437	0.976096	2.83087	0.89433	2.76812	1	4.01513	167.756	147.607	148.966	219.213	211.991	316.664	103.691	107.907	109.42	127.164	121	3.36334	31.5446	38.7224	21.0811	24.2177	40.5897	15.6424	61.334	75.5708	39.6675	452.482	402.598	390.535	398.83	426.624	hoxa11b	homeobox protein Hox-A11b-like [Fundulus heteroclitus]
g11004.t1	174.552	3.07236	4.16674e-07	0.976096	0.943623	1.78866	0.922707	3	7.22723	188.865	129.936	130.345	212.217	191.801	166.854	113.263	72.6722	108.337	90.9789	110	11.7717	14.112	5.89254	11.4189	12.1089	24.9073	8.28126	130.924	66.3797	67.542	465.012	518.112	505.577	656.203	689.86	hoxa13b	homeobox protein Hox-A13b-like isoform X2 [Xiphophorus maculatus]
g11014.t1	821.979	2.09986	0.000159799	239.144	386.886	300.495	283.271	335	358.149	423.279	418.913	408.492	472.241	382.593	442.254	203.395	192.692	210.173	208.838	189	377.535	406.759	367.863	195	229.137	190.956	237.396	2367.26	947.698	1562.04	4189.29	1309.72	996.017	1992.18	1811.53	HACL1	2-hydroxyacyl-CoA lyase 1 isoform X1 [Xiphophorus hellerii]
g11018.t1	155.44	2.73821	4.07104e-10	4.88048	3.77449	8.04897	2.76812	4	1.60605	87.7665	120.58	152.457	69.9617	85.8059	96.8831	133.204	115.615	126.754	112.69	90	35.3151	21.5831	23.5702	70.2702	109.911	79.3344	66.2501	9.436	27.5731	22.514	167.07	355.034	596.399	660.132	565.374	MACC1	PREDICTED: metastasis-associated in colon cancer protein 1 isoform X1 [Poecilia reticulata]
g11019.t1	179.364	2.70716	0.0097598	241.096	115.122	288.869	160.551	180	68.2571	179.977	228.687	161.768	276.349	317.987	485.313	160.323	97.9974	127.837	98.2159	141	3.36334	0.83012	2.52537	13.1757	0.93145	8.30243	0.92014	3.5385	2.04245	7.50466	271.489	694.779	640.296	389.006	696.344	sp8b	transcription factor Sp8 isoform X1 [Larimichthys crocea]
g11023.t1	307.81	2.13045	2.72121e-08	471.455	393.491	384.562	409.682	403	281.059	247.746	267.148	331.682	200.557	273.569	264.634	323.836	265.364	288.176	250.192	294	68.1077	83.012	91.7552	86.081	91.2821	61.807	81.8925	141.54	232.84	243.366	388.438	1020.93	597.913	850.706	1073.69	Fhod3	PREDICTED: FH1/FH2 domain-containing protein 3-like isoform X1 [Poecilia reticulata]
g11025.t1	32.5681	2.15814	0.000436348	2.92829	2.83087	7.15464	2.76812	4	2.40908	53.3265	43.6585	43.0604	22.1545	37.3508	29.6032	39.0837	42.9427	36.8345	35.151	24	1.68167	4.98072	4.20896	1.75676	2.79435	9.22493	4.6007	23.59	16.3396	17.1535	41.7676	83.2376	104.446	55.011	133.563	Mrc1	macrophage mannose receptor 1-like isoform X2 [Fundulus heteroclitus]
g11035.t1	1708.16	2.85476	1.07082e-23	59.5419	66.0536	59.0258	84.8891	55	48.1815	803.23	674.627	620.303	678.628	790.424	732.006	940.402	770.766	858.027	853.961	739	721.437	711.413	645.654	852.905	1408.35	1016.59	1028.72	383.337	200.16	260.519	3264.83	4747.94	4925.59	7292.89	6245.05	KCNK5	potassium channel subfamily K member 5-like [Xiphophorus hellerii]
g11036.t1	265.855	4.17896	1.09491e-12	1.95219	1.88725	2.68299	4.61354	1	2.40908	73.3239	100.83	52.3708	71.1277	29.275	34.0885	11.9644	160.76	131.088	114.758	117	56.336	63.9192	58.0836	40.4054	14.9032	23.0623	57.0487	3.5385	3.06368	5.36047	1013.56	963.178	634.242	1626.75	905.117	PON2	serum paraoxonase/arylesterase 2-like [Xiphophorus hellerii]
g11044.t1	647.058	2.90111	1.76525e-09	12.6893	32.0832	32.1959	33.2175	32	39.3482	108.875	154.884	200.173	149.252	114.071	118.413	137.192	268.667	253.508	245.023	180	270.749	230.773	259.272	532.297	659.467	603.31	626.615	11.795	100.08	57.8931	1133.29	2125.11	2099.51	2269.2	2520.84	-	uncharacterized protein si:dkey-262k9.2 isoform X1 [Notolabrus celidotus]
g11048.t1	1929.83	4.57011	8.80956e-22	32.2112	23.5906	31.3015	58.1306	32	17.6666	876.554	875.248	1039.27	644.813	679.381	602.828	645.28	482.279	473.432	431.116	308	362.4	348.65	389.749	207.297	163.935	253.685	226.354	31.8465	16.3396	49.3164	9900.31	7907.57	7184.03	6758.5	7097	St14	suppressor of tumorigenicity 14 protein homolog [Fundulus heteroclitus]
g1110.t1	313.291	2.22049	2.49528e-19	802.351	854.923	819.206	709.562	672	674.541	206.64	155.923	159.44	190.063	156.47	127.383	144.37	279.678	267.592	303.952	272	102.582	117.047	90.9135	220.473	184.427	124.537	139.861	163.95	203.224	131.868	541.586	791.606	699.331	1041.28	1028.31	Hdac11	histone deacetylase 11 [Fundulus heteroclitus]
g11105.t1	53.3683	3.15076	3.20666e-07	2.92829	0.943623	0.89433	32.2948	58	239.302	11.1097	29.1056	15.1293	23.3206	18.1707	8.97066	19.9407	14.3142	22.7507	11.3724	19	6.72668	51.4674	0.841791	3.51351	2.79435	4.61246	4.6007	4117.63	4529.14	9941.53	128.087	197.052	137.747	186.644	232.115	EDN2	PREDICTED: endothelin-2-like [Poecilia mexicana]
g11143.t1	13.9709	2.41888	0.00203997	1.95219	0.943623	3.57732	1.84541	3	4.01513	13.3316	17.6713	32.5863	23.3206	12.1138	2.6912	3.98813	6.60657	15.1671	12.4062	13	1.68167	0.83012	0.841791	0.878378	0.93145	2.76748	2.76042	1.1795	3.06368	4.28838	2.7845	47.5643	39.3563	27.5055	76.5071	-	PREDICTED: ly6/PLAUR domain-containing protein 2 [Poecilia reticulata]
g11158.t1	897.767	4.34796	1.77986e-09	975.12	667.142	561.639	1044.5	823	1020.65	301.072	438.664	407.328	396.449	387.641	456.607	240.883	383.181	368.345	411.473	334	9.24919	28.2241	5.05075	57.0945	13.9718	26.7523	74.5313	14.154	17.3609	105.065	5427	2296.68	2515.77	4418.56	2965.62	MAL2	PREDICTED: protein MAL2 [Poecilia latipinna]
g11188.t1	1337.92	3.49233	6.85099e-33	270.379	158.529	146.67	167.933	120	138.12	433.277	640.324	550.475	651.81	514.836	549.902	592.636	736.632	697.689	758.847	739	224.503	235.754	234.018	302.162	230.068	349.625	228.195	218.207	310.453	299.114	4994.01	4382.71	4603.17	5116.02	4404.99	cobl	protein cordon-bleu-like [Fundulus heteroclitus]
g11191.t1	87.7436	2.572	0.0066241	42.9482	107.573	49.1881	67.3576	54	23.2877	67.769	92.5143	65.1725	73.4598	59.5594	147.119	27.9169	126.626	113.754	100.284	82	0.840835	0.83012	0.841791	18.4459	1.8629	1.84499	6.44098	8.2565	2.04245	7.50466	728.148	84.9363	115.041	166.998	158.201	Ddc	PREDICTED: aromatic-L-amino-acid decarboxylase [Cyprinodon variegatus]
g11198.t1	133.851	3.79606	4.44189e-25	2.92829	0.943623	0.89433	0.922707	5	3.2121	53.3265	39.5005	64.0087	27.9847	44.4172	84.3242	33.5003	42.9427	60.6686	70.3019	55	46.2459	14.112	9.2597	31.6216	35.3951	23.0623	25.7639	24.7695	9.19104	11.793	540.194	439.97	516.173	428.3	538.143	GRINA	protein lifeguard 1-like [Xiphophorus maculatus]
g11280.t1	109.374	2.60161	0.00332954	27.3307	16.9852	14.3093	6.45895	28	12.8484	77.7677	49.8954	67.5001	88.6181	127.195	172.237	165.109	72.6722	104.003	89.9451	119	1.68167	3.32048	2.52537	18.4459	1.8629	22.1398	18.4028	1.1795	2.04245	3.21628	245.036	258.206	334.528	410.618	343.633	gdf6a	growth/differentiation factor 6 [Fundulus heteroclitus]
g11286.t1	621.2	3.54372	1.36648e-12	15.6175	15.098	3.57732	11.0725	9	16.0605	741.016	677.746	563.277	377.793	428.02	179.413	258.431	341.339	323.927	333.934	305	34.4743	34.0349	38.7224	150.203	36.3266	25.8298	276.042	109.693	214.458	176.896	3940.07	1051.51	1727.14	2491.21	1732.43	NCOA7	PREDICTED: nuclear receptor coactivator 7-like isoform X1 [Cyprinodon variegatus]
g11292.t1	19579.9	2.97663	3.79502e-33	9798.05	11572.6	11440.3	9765.93	10304	11322.7	15282.5	14816.8	16122.1	14573	13641.1	11901.4	9379.29	7832.08	8319.18	8796.01	8878	8787.57	8087.86	9302.64	4844.25	4341.49	4942.72	4299.81	8276.55	10788.2	7322.41	104919	43378.7	41260.5	62626.1	58072.8	MDH2	malate dehydrogenase, mitochondrial [Fundulus heteroclitus]
g11329.t1	689.813	3.05125	3.46005e-06	22.4502	40.5758	34.8789	43.3672	53	35.3331	293.295	194.384	108.233	139.923	386.631	1483.75	1041.7	137.637	203.673	204.703	373	85.7652	63.9192	88.3881	137.905	149.964	147.599	92.9341	130.924	16.3396	37.5233	4633.42	805.196	1593.93	2139.54	1894.52	SQLE	PREDICTED: squalene monooxygenase [Cyprinodon variegatus]
g11342.t1	339.375	2.86852	4.09234e-18	203.028	141.544	121.629	160.551	175	196.741	188.865	160.081	185.043	190.063	157.479	119.31	114.061	295.093	289.259	298.783	267	61.381	78.8614	69.0269	105.405	144.375	104.242	138.941	68.411	86.8043	117.93	878.511	973.37	903.681	1473.51	1043.87	RIDA	PREDICTED: ribonuclease UK114 [Cyprinodon variegatus]
g11388.t1	11.1161	3.11186	2.29143e-13	1.95219	1.88725	0.89433	2.76812	1	2.40908	1.11097	1.03949	2.32759	4.66411	4.03793	8.07359	4.78576	7.70766	7.58357	2.0677	2	3.36334	0.83012	1.68358	1.75676	0.93145	3.68997	4.6007	11.795	4.08491	7.50466	23.6683	25.4809	54.4933	53.0463	24.6379	-	PREDICTED: uncharacterized protein LOC106536897 [Austrofundulus limnaeus]
g1139.t1	351.88	4.1199	6.88381e-12	57.5897	26.4215	28.6186	65.5122	28	36.9392	128.872	130.975	137.328	156.248	222.086	274.502	148.359	121.12	145.171	109.588	113	20.18	18.2626	16.8358	25.473	29.8064	33.2097	32.2049	22.4105	3.06368	16.0814	1638.68	993.755	1127.71	1485.3	1499.02	EFCC1	PREDICTED: EF-hand and coiled-coil domain-containing protein 1-like isoform X2 [Cyprinodon variegatus]
g11417.t1	171.602	2.70973	1.27807e-07	2.92829	2.83087	8.04897	22.145	9	6.4242	224.415	208.937	256.035	220.379	183.726	87.9125	157.93	133.232	183.089	156.112	83	45.4051	43.9963	70.7105	40.4054	22.3548	45.2021	25.7639	15.3335	9.19104	21.4419	257.567	499.426	608.509	412.583	792.302	-	PREDICTED: nucleolar protein 58-like [Poecilia latipinna]
g11419.t1	15.5962	3.0538	9.09303e-17	0.976096	0.943623	0.89433	0.922707	1	0.803025	12.2206	13.5133	22.1121	18.6564	5.04741	8.97066	11.1668	9.90985	13.0004	10.3385	6	3.36334	4.98072	5.05075	6.14864	4.65725	4.61246	5.52084	1.1795	1.02123	1.07209	29.2373	45.8656	75.6851	35.3642	66.1332	-	restin homolog isoform X1 [Salvelinus alpinus]
g11435.t1	2946.31	2.07272	6.78588e-09	400.199	545.414	660.91	605.296	619	523.572	771.012	1001.03	960.131	833.71	869.164	694.329	1596.85	858.854	1006.45	918.06	1024	2300.53	3455.79	3775.43	2468.24	2419.91	2654.01	1634.17	2236.33	2208.91	1523.45	5202.85	7233.18	6604.29	8615.12	9204.19	Myzap	tuftelin [Parambassis ranga]
g11440.t1	4463.76	2.03787	0.000552762	97.6096	94.3623	193.175	215.913	147	175.059	2836.3	2258.81	3227.2	1885.47	1867.54	1291.78	2193.47	2846.33	3018.26	3375.53	2558	3685.38	2106.01	3278.78	4684.39	5663.22	5742.52	5610.09	109.693	228.755	365.584	4389.77	7272.25	13736.9	13452.2	16305.1	-	PREDICTED: protein S100-A16-like [Cyprinodon variegatus]
g11448.t1	314.249	2.73555	1.4139e-06	315.279	300.072	291.552	294.344	222	179.075	238.858	307.688	409.656	338.148	317.987	292.444	320.646	286.285	280.592	273.971	236	33.6334	58.9385	42.0896	75.5405	55.887	69.1869	44.1667	14.154	18.3821	52.5326	885.473	783.113	950.605	1090.4	1017.93	efna1	ephrin-A1 [Xiphophorus maculatus]
g11454.t1	553.842	3.35351	6.65277e-10	21.4741	20.7597	58.1314	48.9035	29	20.8787	241.08	119.541	158.276	188.897	166.564	32.2944	196.216	159.659	165.755	115.791	133	388.466	388.496	342.609	275.811	396.798	294.275	220.834	14.154	22.467	12.8651	842.313	2402	2517.29	1436.18	2340.6	S100A6	protein S100-A6-like [Xiphophorus couchianus]
g11455.t1	79100.1	2.63753	1.05996e-07	1601.77	1657.95	3309.02	5659.89	1737	2283	38420.6	26555.8	39465.5	31946.8	27805.2	15138	30748.5	22639.6	26088.6	23684.5	15780	71807.3	55966.7	67148	72402.9	76145.1	58213.9	76919.1	3654.09	4193.16	10432.6	184919	222010	185772	247310	322495	LOC108265573//LOC100305037	ictacalcin-like [Xiphophorus hellerii]
g11489.t1	3213.82	4.23328	4.37872e-05	21.4741	19.8161	13.4149	23.9904	18	12.0454	1532.02	1628.88	2014.53	2224.78	1778.71	2979.16	565.517	1406.1	1436.55	1522.86	1555	22.7026	2.49036	2.52537	181.824	5.5887	36.8997	91.0939	12.9745	9.19104	15.0093	14308.2	10085.3	7498.88	16754.8	13805	pkm	PREDICTED: pyruvate kinase PKM-like [Cyprinodon variegatus]
g11496.t1	4.26647	2.56664	4.60416e-07	5.85658	0.943623	1.78866	0.922707	2	0.803025	1.11097	1.03949	1.1638	2.33206	3.02844	8.97066	0.797626	3.30328	2.16674	1.03385	3	0.840835	0.83012	0.841791	0.878378	0.93145	0.922493	0.92014	3.5385	1.02123	4.28838	11.138	18.686	10.5959	7.85872	12.9673	-	PREDICTED: uncharacterized protein LOC107088798 [Cyprinodon variegatus]
g11497.t1	238.389	5.529	1.52313e-16	2.92829	3.77449	1.78866	2.76812	2	3.2121	52.2155	45.7374	40.7328	67.6296	65.6163	91.5007	19.143	34.1339	26.0008	31.0155	34	3.36334	21.5831	3.36717	10.5405	1.8629	7.37994	42.3264	1.1795	3.06368	3.21628	1588.56	796.703	529.796	1143.44	1052.94	mpv17l	mpv17-like protein [Fundulus heteroclitus]
g11503.t1	1355.64	2.16568	2.71945e-53	783.805	804.911	733.351	736.32	906	1175.63	900.995	808.721	996.209	890.845	805.566	831.58	646.875	748.744	855.861	850.86	948	710.506	659.945	723.099	751.013	795.459	799.801	701.147	907.035	968.123	881.262	3448.61	2289.88	2417.38	4679.87	4565.79	NDUFA3	PREDICTED: NADH dehydrogenase [ubiquinone] 1 alpha subcomplex subunit 3 [Cyprinodon variegatus]
g11509.t1	364.001	5.30263	2.0184e-19	0.976096	5.66174	3.57732	3.69083	4	5.62118	33.329	96.6723	43.0604	78.1239	65.6163	131.869	22.3335	88.0876	79.0859	86.8435	56	10.09	6.64096	4.20896	19.3243	1.8629	7.37994	13.8021	21.231	30.6368	50.3885	1225.18	1416.74	1761.95	1477.44	1856.92	Tmc7	transmembrane channel-like protein 4 [Fundulus heteroclitus]
g11521.t1	369.096	2.19464	6.00913e-13	131.773	148.149	144.881	85.8118	141	119.651	197.752	224.529	275.819	148.086	158.489	108.545	347.765	320.418	274.092	225.38	174	234.593	171.005	218.866	207.297	201.193	235.236	311.927	51.898	339.047	56.821	900.787	1234.97	947.578	797.66	923.272	Pitpnc1	PREDICTED: cytoplasmic phosphatidylinositol transfer protein 1-like [Poecilia mexicana]
g11536.t1	37.0688	3.03266	5.37609e-06	2.92829	0.943623	3.57732	1.84541	4	0.803025	39.9948	55.0928	65.1725	45.4751	28.2655	21.5296	33.5003	40.7405	33.5844	19.6432	20	0.840835	0.83012	0.841791	7.02702	2.79435	4.61246	1.84028	11.795	9.19104	21.4419	32.0218	152.885	118.069	84.4812	211.367	TMEM238	PREDICTED: transmembrane protein 238-like [Cyprinodon variegatus]
g11558.t1	1072.97	2.11243	1.40647e-08	223.526	129.276	117.157	133.793	83	110.817	817.672	803.523	1311.6	693.787	622.85	558.872	1082.38	750.946	750.774	762.983	577	696.212	563.651	558.108	998.715	1073.03	812.716	926.581	116.77	205.267	147.949	1720.82	2306.87	2898.74	3241.72	3418.18	ARHGEF5	uncharacterized protein LOC114139357 [Xiphophorus couchianus]
g11561.t1	286.795	3.61324	5.06784e-05	5.85658	6.60536	11.6263	19.3769	8	10.4393	253.301	260.911	366.596	211.051	149.403	130.972	153.144	230.129	225.341	195.398	126	4.20418	3.32048	0.841791	18.4459	0.93145	25.8298	4.6007	1.1795	4.08491	61.1094	505.388	1156.83	1185.23	891.964	1413.44	STYK1	PREDICTED: tyrosine-protein kinase STYK1-like [Cyprinodon variegatus]
g11562.t1	1588.09	2.39832	3.08795e-13	811.136	588.821	547.33	611.755	595	721.92	667.692	531.178	729.7	573.686	508.779	623.461	445.076	721.217	731.273	703.019	650	464.982	540.408	444.466	662.297	774.967	748.142	620.174	5617.96	1908.67	2651.29	3775.79	3986.91	3696.46	5927.44	4502.25	GSTK1	PREDICTED: glutathione S-transferase kappa 1 isoform X1 [Cyprinodon variegatus]
g11563.t1	1632.06	5.16971	5.15705e-23	76.1355	135.882	119.84	143.02	222	242.514	231.081	393.966	310.733	339.314	343.224	303.208	107.68	380.979	432.264	379.424	291	34.4743	99.6144	70.7105	265.27	71.7217	160.514	351.493	22.4105	17.3609	68.6141	9251.52	5094.48	5888.3	6322.34	7753.15	RAP1GAP2	PREDICTED: rap1 GTPase-activating protein 2-like [Cyprinodon variegatus]
g11581.t1	149.533	3.00178	2.70837e-05	27.3307	24.5342	29.5129	40.5991	24	20.0756	138.871	123.699	122.199	117.769	102.967	76.2506	102.096	157.457	171.172	133.367	99	3.36334	4.1506	8.41791	8.78378	4.65725	20.2948	12.882	20.0515	15.3184	32.1628	114.165	567.375	603.967	379.183	736.543	PLEKHG6	PREDICTED: pleckstrin homology domain-containing family G member 6 [Cyprinodon variegatus]
g11593.t1	19.0324	5.14193	7.78441e-43	0.976096	2.83087	0.89433	0.922707	1	0.803025	1.11097	3.11846	1.1638	3.49808	7.06637	4.48533	1.59525	2.20219	3.2501	2.0677	4	0.840835	1.66024	0.841791	1.75676	1.8629	0.922493	2.76042	1.1795	2.04245	2.14419	151.756	71.3465	77.1989	49.117	49.2757	CDC42	cell division cycle 42, like [Epinephelus lanceolatus]
g11641.t1	15.8413	2.16824	9.93073e-05	3.90439	0.943623	0.89433	0.922707	1	1.60605	4.44387	12.4738	8.14657	19.8225	10.0948	12.5589	4.78576	14.3142	21.6674	13.4401	18	3.36334	3.32048	3.36717	3.51351	0.93145	0.922493	4.6007	5.8975	11.2335	13.9372	8.35351	42.4682	69.6303	31.4349	51.8692	CEACAM5	carcinoembryonic antigen-related cell adhesion molecule 5-like isoform X1 [Kryptolebias marmoratus]
g11642.t1	20.3258	2.33151	0.00233661	0.976096	0.943623	0.89433	0.922707	1	0.803025	7.77677	8.3159	11.638	17.4904	3.02844	3.58826	1.59525	17.6175	24.9175	14.4739	14	1.68167	1.66024	4.20896	1.75676	0.93145	2.76748	0.92014	43.6415	20.4245	35.3791	43.1598	71.3465	104.446	7.85872	47.979	CEACAM5	carcinoembryonic antigen-related cell adhesion molecule 5-like isoform X1 [Xiphophorus maculatus]
g11673.t1	30.0384	2.63356	0.00245878	0.976096	4.71812	0.89433	7.38166	8	4.81815	1.11097	1.03949	1.1638	3.49808	6.05689	8.07359	106.882	17.6175	19.5006	28.9478	27	0.840835	0.83012	0.841791	3.51351	0.93145	1.84499	2.76042	2.359	1.02123	5.36047	29.2373	117.212	110.5	106.093	80.3973	Mep1b	PREDICTED: meprin A subunit beta-like [Poecilia mexicana]
g11676.t1	1254.43	2.6278	7.88472e-52	130.797	98.1368	114.474	152.247	98	72.2723	568.816	723.483	798.364	623.825	587.518	615.387	831.127	505.402	631.603	544.84	461	805.52	913.962	732.358	550.743	743.297	583.015	670.782	498.928	294.113	515.678	3617.07	3295.53	3449.73	3799.69	4216.97	Lsr	lipolysis-stimulated lipoprotein receptor isoform X2 [Fundulus heteroclitus]
g1168.t1	12723.9	3.46732	4.7866e-05	588.586	730.364	847.825	492.726	630	719.511	3006.28	2166.29	945.002	2239.94	5803.51	30529.9	16802	1357.65	1834.14	1911.59	3600	529.726	103.765	174.251	1076.89	296.201	1000.9	187.709	2919.26	687.286	1289.73	81783.7	21122	21464.3	62003.3	34874.3	HMGCR	3-hydroxy-3-methylglutaryl-coenzyme A reductase [Fundulus heteroclitus]
g11693.t1	155.982	5.1264	3.92319e-18	0.976096	1.88725	0.89433	2.76812	1	0.803025	14.4426	24.9477	27.9311	15.1584	19.1801	12.5589	2.39288	58.358	66.0854	36.1848	34	6.72668	6.64096	12.6269	36.0135	20.4919	11.0699	4.6007	2.359	2.04245	5.36047	349.455	796.703	885.516	500.993	757.29	NLRC3	NLR family CARD domain-containing protein 3-like [Fundulus heteroclitus]
g1170.t1	54.5606	2.97703	0.00108143	0.976096	0.943623	0.89433	2.76812	1	0.803025	47.7716	53.0138	58.1898	52.4713	47.4456	61.8976	70.1911	47.3471	57.4185	46.5233	34	0.840835	0.83012	0.841791	4.39189	0.93145	7.37994	1.84028	1.1795	1.02123	1.07209	57.0824	180.065	257.33	145.386	230.818	marveld2	MARVEL domain-containing protein 2-like [Fundulus heteroclitus]
g11706.t1	648.071	5.13374	1.28313e-26	3.90439	1.88725	7.15464	8.30436	8	4.01513	76.6568	76.922	67.5001	78.1239	73.6921	132.766	98.1081	90.2897	100.753	75.4712	81	99.2186	95.4638	104.382	117.703	97.8023	108.854	57.0487	2.359	2.04245	9.64885	2955.75	2738.35	1954.19	3575.72	2410.62	HMCN1	uncharacterized protein LOC105916793 [Fundulus heteroclitus]
g11707.t1	493.655	3.53678	9.86395e-13	151.295	135.882	113.58	91.348	98	81.9086	44.4387	115.383	57.026	40.811	80.7585	86.1183	50.2505	27.5274	32.501	58.9295	42	364.082	372.724	409.111	150.203	238.451	190.033	166.545	53.0775	284.922	84.6955	2517.19	1520.36	932.441	2194.55	1556.08	-	PREDICTED: uncharacterized protein LOC107082955 isoform X1 [Cyprinodon variegatus]
g1171.t1	279.368	3.3105	0.000231552	6.83267	5.66174	5.36598	9.22707	1	1.60605	227.748	228.687	294.44	248.364	192.811	217.987	264.812	214.713	231.841	182.992	156	2.52251	7.47108	3.36717	22.8378	0.93145	25.8298	4.6007	3.5385	3.06368	19.2977	238.075	1104.17	1248.8	1005.92	1176.13	ocln	occludin [Fundulus heteroclitus]
g11716.t1	435.405	4.95465	1.3195e-09	1.95219	0.943623	3.57732	1.84541	1	0.803025	41.1058	98.7513	58.1898	103.776	78.7396	71.7653	50.2505	177.276	211.257	186.093	135	2.52251	1.66024	2.52537	24.5946	6.52015	13.8374	14.7222	1.1795	2.04245	11.793	1468.83	1661.35	1919.38	1836.97	2162.95	IL20RA	PREDICTED: interleukin-20 receptor subunit alpha-like [Cyprinodon variegatus]
g1172.t1	11.8366	3.27701	1.06838e-07	0.976096	0.943623	0.89433	0.922707	1	0.803025	15.5535	11.4344	15.1293	20.9885	6.05689	5.3824	8.77389	13.2131	14.0838	3.10155	10	0.840835	0.83012	0.841791	1.75676	0.93145	1.84499	0.92014	2.359	1.02123	2.14419	8.35351	35.6733	68.1166	41.2583	46.6823	-	PREDICTED: uncharacterized protein LOC109098997 [Cyprinus carpio]
g11735.t1	2259.65	3.5738	1.39963e-20	231.335	195.33	255.778	169.778	291	275.438	562.15	682.943	812.329	517.716	467.39	436.871	520.052	574.771	709.606	616.176	425	818.974	830.12	873.779	824.797	1003.17	1232.45	1259.67	68.411	717.922	88.9839	3763.26	8136.9	8947.5	9738.91	9743.63	SH3KBP1	PREDICTED: SH3 domain-containing protein 21 [Poecilia mexicana]
g1174.t1	1339.23	2.14061	1.29763e-10	184.482	153.811	207.485	217.759	252	272.226	833.226	779.615	736.682	602.836	1007.46	1654.19	471.397	519.717	576.352	752.644	695	1015.73	1016.9	992.472	734.324	706.971	820.096	989.15	632.212	484.061	478.154	8143.28	1146.64	1256.37	4064.92	2332.82	Dhfr	dihydrofolate reductase isoform X1 [Xiphophorus maculatus]
g11754.t1	181.85	2.81517	4.50392e-08	97.6096	109.46	80.4897	73.8166	97	122.06	92.2103	98.7513	114.052	107.275	88.8344	53.824	35.8932	199.298	174.422	186.093	155	29.4292	38.1855	40.406	83.4459	40.9838	75.6444	65.3299	5.8975	25.5307	9.64885	524.879	519.81	544.933	650.309	549.813	Smpdl3b	acid sphingomyelinase-like phosphodiesterase 3b [Fundulus heteroclitus]
g11758.t1	245.97	2.35749	1.27577e-06	686.196	546.358	599.201	525.943	597	627.163	135.538	216.213	150.13	184.232	223.095	212.605	106.084	269.768	276.259	232.617	295	50.4501	42.3361	53.0329	79.9324	43.7782	61.807	90.1737	18.872	128.675	38.5954	432.991	749.138	482.871	966.622	726.169	Cyp4b1	PREDICTED: cytochrome P450 4B1-like [Poecilia latipinna]
g11765.t1	125.267	2.09902	9.72713e-10	12.6893	3.77449	1.78866	10.1498	3	16.8635	119.985	106.028	121.035	115.437	89.8438	79.8389	144.37	79.2788	75.8357	76.505	43	132.011	68.8999	88.3881	72.9053	118.294	69.1869	70.8508	22.4105	17.3609	21.4419	256.174	332.95	249.761	298.631	443.482	RAB39A	PREDICTED: putative Ras-related protein Rab-42 isoform X1 [Poecilia reticulata]
g11812.t1	560.005	3.00151	2.84289e-07	44.9004	28.3087	28.6186	36.9083	17	23.2877	451.053	322.241	351.466	385.955	404.802	200.943	252.05	504.301	684.688	632.717	482	84.9244	75.5409	83.3373	137.027	89.4192	123.614	110.417	35.385	17.3609	37.5233	1400.61	1471.1	1681.72	2218.12	2184.99	agmo	alkylglycerol monooxygenase isoform X2 [Xiphophorus couchianus]
g11847.t1	11.5474	4.34833	1.45718e-31	0.976096	0.943623	0.89433	0.922707	1	0.803025	1.11097	4.15795	1.1638	1.16603	1.00948	8.07359	1.59525	1.10109	1.08337	3.10155	3	4.20418	4.1506	1.68358	1.75676	1.8629	1.84499	0.92014	1.1795	1.02123	1.07209	51.5133	42.4682	33.3015	68.7638	32.4182	-	-
g11848.t1	752.661	4.26575	1.37617e-20	19.5219	17.9288	25.9356	14.7633	17	24.8938	119.985	175.673	102.414	170.24	170.602	268.223	588.648	138.738	174.422	135.435	226	135.375	87.9927	138.896	122.094	124.814	150.366	124.219	11.795	107.229	11.793	3114.47	2920.11	2334.13	3727	2611.61	PRDM1	PREDICTED: PR domain zinc finger protein 1-like [Poecilia latipinna]
g11859.t1	4.37176	3.56002	2.04853e-09	0.976096	0.943623	0.89433	0.922707	1	0.803025	2.22194	1.03949	1.1638	4.66411	4.03793	0.897066	1.59525	2.20219	1.08337	1.03385	1	0.840835	0.83012	0.841791	0.878378	0.93145	1.84499	1.84028	1.1795	1.02123	1.07209	1.39225	44.1669	9.08222	1.96468	22.0444	-	PREDICTED: C-type lectin domain family 4 member E-like [Poecilia latipinna]
g11861.t1	1415.03	2.57453	1.36184e-11	1413.39	1276.72	1137.59	1314.86	1173	1274.4	356.621	398.124	364.268	486.234	473.447	550.799	311.872	365.563	344.511	310.155	367	1417.65	1514.97	1720.62	732.567	949.148	822.863	670.782	273.644	605.587	318.412	6975.18	3105.27	2184.27	4491.26	3620.47	SH3BP5	SH3 domain-binding protein 5 [Xiphophorus maculatus]
g11871.t1	1032.79	2.35001	0.0132177	118.108	133.995	161.874	110.725	140	142.938	2014.18	1411.62	3956.9	1408.56	853.012	277.193	548.767	1856.45	1427.88	1856.8	778	32.7926	36.5253	36.197	128.243	24.2177	188.188	47.8473	2.359	6.12736	48.2443	1500.85	3725.31	3212.08	2106.14	3550.45	rhbg	ammonium transporter Rh type B [Xiphophorus hellerii]
g11878.t1	2506.59	2.77838	1.81367e-47	876.534	852.092	793.271	886.722	831	999.766	1098.75	1017.66	1181.25	873.355	1068.03	1346.5	902.913	942.537	1003.2	1078.31	938	1563.11	1173.79	1529.53	1397.5	1540.62	1475.99	1436.34	537.852	872.128	689.357	7586.38	5801.15	6829.83	8072.87	9778.64	SRI	PREDICTED: sorcin [Poecilia latipinna]
g11893.t1	72.3724	2.14591	0.000630564	4.88048	2.83087	3.57732	6.45895	2	4.01513	109.986	61.3297	96.595	55.9693	58.5499	53.824	85.346	69.369	87.7528	87.8774	44	44.5643	18.2626	28.6209	7.02702	2.79435	28.5973	4.6007	4.718	84.7618	8.57676	37.5908	181.764	267.925	166.998	273.61	Dclk3	PREDICTED: probable serine/threonine-protein kinase MARK-A [Cyprinodon variegatus]
g11911.t1	124.025	2.49627	0.00108155	22.4502	13.2107	18.7809	13.8406	13	5.62118	66.6581	110.186	81.4657	120.101	128.204	274.502	148.359	94.6941	86.6694	97.1821	139	12.6125	9.13132	7.57612	18.4459	13.0403	15.6824	11.0417	3.5385	3.06368	15.0093	703.087	288.783	260.357	280.949	215.257	nr2f5	nuclear receptor subfamily 2 group F member 5 [Oryzias melastigma]
g11920.t1	713.014	4.48388	1.93035e-13	11.7132	17.9288	12.5206	13.8406	7	1.60605	187.754	240.122	296.768	200.557	186.754	270.914	181.859	260.959	284.926	304.986	256	42.8826	29.8843	19.3612	73.7837	38.1895	52.5821	61.6494	7.077	9.19104	17.1535	3142.31	2301.77	2511.23	3365.49	2903.38	-	PREDICTED: transmembrane protein 176B-like [Poecilia reticulata]
g11924.t1	161.313	3.16075	6.77754e-05	6.83267	3.77449	14.3093	4.61354	7	6.4242	185.532	192.305	217.63	151.584	129.214	154.295	157.93	120.019	111.587	124.062	84	4.20418	15.7723	4.20896	9.66215	1.8629	10.1474	13.8021	2.359	2.04245	27.8745	267.312	445.066	587.317	679.779	689.86	RAB25	PREDICTED: ras-related protein Rab-25 [Poecilia latipinna]
g11931.t1	952.063	5.03389	5.37442e-19	3.90439	3.77449	12.5206	18.4541	1	1.60605	86.6555	62.3692	30.2587	79.2899	64.6068	87.9125	35.0956	27.5274	43.3347	47.5572	64	173.212	224.962	168.358	177.432	231.931	303.5	337.691	14.154	10.2123	15.0093	2781.72	3395.75	2553.62	7646.53	3528.4	-	C-type lectin domain family 12 member B [Fundulus heteroclitus]
g11933.t1	8.9707	2.36399	2.45879e-09	0.976096	2.83087	0.89433	1.84541	1	10.4393	1.11097	1.03949	2.32759	2.33206	3.02844	0.897066	1.59525	2.20219	3.2501	5.16926	2	3.36334	4.1506	7.57612	6.14864	4.65725	10.1474	8.28126	3.5385	6.12736	2.14419	23.6683	28.8783	19.6781	17.6821	32.4182	Asgr2	dromaiocalcin-1-like [Xiphophorus maculatus]
g11942.t1	26.0177	3.73491	3.12124e-18	0.976096	2.83087	2.68299	1.84541	1	2.40908	7.77677	2.07897	11.638	8.1622	3.02844	25.1179	5.58339	9.90985	9.75031	10.3385	4	2.52251	9.13132	11.7851	4.39189	1.8629	8.30243	7.36112	2.359	4.08491	1.07209	114.165	91.7312	74.1714	151.28	44.0888	-	uncharacterized protein LOC110367085 [Fundulus heteroclitus]
g11948.t1	546.612	5.0405	2.85916e-17	15.6175	12.2671	15.2036	23.9904	3	6.4242	168.867	199.582	238.578	179.568	136.28	170.443	220.145	118.918	156.005	96.1482	95	29.4292	31.5446	42.9314	24.5946	14.9032	25.8298	16.5625	4.718	5.10613	11.793	3211.93	1669.85	1734.7	2571.76	2204.44	Rnf223	RING finger protein 225 [Fundulus heteroclitus]
g11951.t1	1127.16	3.19934	1.84791e-12	47.8287	50.9557	79.5954	117.184	53	47.3785	525.488	479.204	462.027	482.736	418.935	325.635	224.133	282.981	335.844	313.257	263	799.634	801.896	850.209	410.202	535.584	599.62	569.567	60.1545	43.9127	45.028	3626.82	3550.34	2821.54	4229.95	4548.93	-	uncharacterized protein LOC105921198 [Fundulus heteroclitus]
g11958.t1	272.037	2.35155	2.16682e-07	46.8526	29.2523	50.9768	20.2996	55	51.3936	166.645	104.988	159.44	58.3014	57.5404	48.4416	169.097	57.2569	61.752	66.1665	49	230.389	204.209	291.26	180.067	106.185	191.878	225.434	44.821	344.153	38.5954	1084.56	518.112	590.344	616.909	876.589	pycard	apoptosis-associated speck-like protein containing a CARD [Xiphophorus maculatus]
g11970.t1	241.582	3.4833	1.73984e-06	30.259	7.54899	22.3582	8.30436	11	12.0454	331.068	198.542	515.561	185.398	117.1	89.7066	126.823	210.309	222.09	254.328	124	10.09	4.98072	16.8358	23.7162	13.0403	26.7523	15.6424	1.1795	17.3609	7.50466	737.894	917.312	794.694	927.328	866.216	-	-
g11971.t1	463.654	4.99348	8.27046e-14	0.976096	0.943623	4.47165	0.922707	7	4.01513	135.538	216.213	104.742	163.244	128.204	244.899	58.2267	127.727	93.1696	131.299	104	8.40835	5.81084	1.68358	40.4054	9.3145	8.30243	6.44098	30.667	18.3821	31.0907	2607.69	1722.51	1400.18	2284.92	1629.99	Cd82	CD82 antigen [Fundulus heteroclitus]
g1198.t1	46.8283	2.51889	7.36086e-07	3.90439	15.098	3.57732	16.6087	1	2.40908	102.209	59.2508	103.578	39.6449	22.2086	38.5738	82.9531	36.3361	34.6678	25.8463	12	19.3392	7.47108	26.9373	10.5405	11.1774	15.6824	7.36112	8.2565	2.04245	8.57676	135.048	120.61	146.829	90.3752	173.762	NCF2	NADPH oxidase activator 1 [Fundulus heteroclitus]
g12012.t1	2775.29	2.78242	5.60735e-36	878.487	662.424	687.74	938.393	532	640.814	1163.18	1171.5	1206.86	1344.43	1087.21	1455.94	1020.96	939.234	1086.62	947.008	834	1975.96	1770.65	1806.48	1330.74	2038.94	1278.57	1578.96	949.497	633.16	811.576	12091.7	6460.26	6778.36	8996.26	7811.5	selenbp1	PREDICTED: selenium-binding protein 1 [Cyprinodon variegatus]
g12022.t1	223.868	2.58812	1.53676e-30	37.0917	44.3503	39.3505	39.6764	40	34.5301	65.5471	83.159	80.3019	85.12	89.8438	170.443	102.894	74.8744	74.7524	65.1327	74	138.738	93.8035	87.5463	92.2297	145.306	111.622	105.816	168.668	119.484	109.354	1133.29	450.162	525.255	717.108	408.47	Npr1	PREDICTED: atrial natriuretic peptide receptor 1 [Stegastes partitus]
g12043.t1	12.4183	2.15633	0.00219942	18.5458	5.66174	6.26031	11.9952	16	8.03025	13.3316	15.5923	5.81898	9.32822	5.04741	0.897066	3.19051	11.0109	18.4173	16.5416	9	0.840835	6.64096	2.52537	2.63513	0.93145	3.68997	1.84028	4.718	1.02123	2.14419	37.5908	50.9618	25.733	29.4702	15.5608	TTPA	PREDICTED: alpha-tocopherol transfer protein [Poecilia latipinna]
g1205.t1	668.204	2.92902	2.58856e-13	11.7132	11.3235	46.5052	47.9808	34	12.0454	145.537	166.318	139.655	138.757	140.318	107.648	196.216	165.164	218.84	222.278	176	459.937	468.188	505.917	425.135	488.08	499.991	512.518	107.334	34.7217	127.579	1555.15	1685.14	2040.47	2703.4	2537.7	ARRDC1	arrestin domain-containing protein 1 [Fundulus heteroclitus]
g12069.t1	1178.41	2.26501	5.19898e-55	450.956	520.88	497.247	525.02	437	505.906	602.145	608.1	548.148	638.983	614.774	851.316	480.969	623.219	639.187	666.834	593	633.149	503.883	629.66	819.526	833.648	772.126	781.199	599.186	727.113	622.887	4391.16	2410.49	2228.17	2880.22	3668.45	Sdr16c5	epidermal retinol dehydrogenase 2 isoform X1 [Xiphophorus maculatus]
g12097.t1	497.156	2.71152	5.67064e-24	126.893	117.009	101.954	124.565	89	123.666	188.865	142.41	189.699	204.055	204.925	244.899	250.455	300.599	254.591	290.512	252	199.278	82.1819	90.9135	213.446	223.548	153.134	132.5	359.747	422.788	341.998	1016.34	1505.07	1604.53	1766.25	1558.67	Acot11	acyl-coenzyme A thioesterase 11 [Fundulus heteroclitus]
g12124.t1	114.272	4.16455	2.21346e-21	6.83267	2.83087	8.04897	2.76812	4	3.2121	19.9974	46.7769	26.7673	27.9847	28.2655	43.0592	18.3454	51.7514	42.2513	34.1171	49	16.8167	5.81084	8.41791	21.9594	35.3951	12.9149	29.4445	2.359	6.12736	5.36047	388.438	453.56	482.871	495.099	389.019	MARVELD2	PREDICTED: MARVEL domain-containing protein 2-like [Poecilia latipinna]
g12141.t1	131.954	2.6863	7.11039e-40	117.132	167.965	118.946	85.8118	74	87.5297	41.1058	43.6585	38.4052	31.4828	43.4077	45.7504	32.7027	39.6394	42.2513	53.7603	43	86.606	81.3517	69.8687	50.9459	53.0927	86.7143	75.4515	71.9495	85.783	91.1281	517.918	390.707	333.015	330.066	389.019	GNG12	guanine nucleotide-binding protein G(I)/G(S)/G(O) subunit gamma-12a isoform X1 [Epinephelus lanceolatus]
g12172.t1	105.328	2.23831	2.1046e-17	153.247	124.558	155.613	115.338	118	114.833	24.4413	33.2636	68.6639	44.3091	55.5215	57.4122	77.3698	94.6941	96.4197	94.0805	68	32.7926	37.3554	31.9881	40.4054	62.4072	58.117	64.4098	43.6415	37.7854	28.9466	245.036	382.213	296.686	212.185	252.862	ATP13A3	probable cation-transporting ATPase 13A3 isoform X2 [Fundulus heteroclitus]
g12176.t1	780.718	2.49789	0.000339812	1.95219	1.88725	24.1469	45.2127	18	18.4696	556.595	501.033	690.131	602.836	479.504	358.826	741.793	465.763	516.766	526.23	459	714.71	703.942	845.158	223.986	432.193	226.011	239.236	2.359	2.04245	12.8651	1406.17	1958.63	2317.48	2616.95	2767.22	CLDN1	claudin-1 isoform X2 [Periophthalmus magnuspinnatus]
g12200.t1	40.0593	5.00488	3.10418e-16	0.976096	0.943623	8.04897	12.9179	6	0.803025	13.3316	11.4344	1.1638	15.1584	9.08533	26.912	4.78576	7.70766	9.75031	8.27081	12	1.68167	0.83012	0.841791	3.51351	0.93145	2.76748	0.92014	1.1795	1.02123	1.07209	182.385	95.1287	187.699	180.75	186.729	KCNMB3	PREDICTED: calcium-activated potassium channel subunit beta-3-like [Poecilia formosa]
g12230.t1	835.564	2.67331	2.31814e-27	189.363	195.33	161.874	188.232	174	236.089	269.965	294.175	233.923	277.515	290.731	846.83	354.944	251.05	254.591	323.596	415	274.953	268.959	287.051	368.04	454.548	464.014	349.653	567.339	313.517	577.859	3055.99	1472.8	1590.9	4102.25	2126.64	Hsd17b7	3-keto-steroid reductase-like isoform X2 [Fundulus heteroclitus]
g12232.t1	622.95	2.36922	2.99955e-61	249.881	298.185	271.876	220.527	257	309.165	288.852	369.018	303.751	370.797	329.091	397.4	349.36	297.296	315.26	347.374	308	357.355	276.43	259.272	475.202	502.983	411.432	372.657	254.772	271.646	271.24	1617.8	1596.8	1480.4	1813.4	2007.34	SLC35D2	UDP-N-acetylglucosamine/UDP-glucose/GDP-mannose transporter-like [Xiphophorus hellerii]
g12236.t1	3817.76	3.96791	2.93893e-61	843.347	923.807	848.719	707.716	1168	1009.4	1157.63	1126.8	1290.65	1003.95	859.069	734.697	616.565	879.774	905.695	1010.07	781	982.096	1015.24	1439.46	986.418	1012.49	1260.12	1009.39	288.977	1815.74	561.778	12315.9	11520.8	11882.6	16908	19291.5	MGST3	microsomal glutathione S-transferase 3 [Betta splendens]
g12246.t1	21.2958	2.98981	8.60918e-05	38.0678	107.573	80.4897	45.2127	70	98.7721	24.4413	31.1846	33.7501	23.3206	26.2465	4.48533	2.39288	22.0219	31.4177	21.7109	21	0.840835	0.83012	0.841791	7.02702	0.93145	0.922493	0.92014	4.718	1.02123	2.14419	47.3366	86.635	68.1166	62.8697	75.2103	TMEM125	PREDICTED: transmembrane protein 125-like [Cyprinodon variegatus]
g12247.t1	509.145	5.36287	1.34163e-11	66.3745	90.5878	92.116	78.4301	92	134.908	122.206	162.16	89.6122	95.6143	86.8154	113.03	23.1312	162.962	167.922	138.536	130	8.40835	2.49036	4.20896	36.0135	5.5887	11.9924	4.6007	1.1795	2.04245	8.57676	2586.81	2184.56	1586.36	2220.09	2274.46	-	leucine-rich repeat-containing protein 19-like [Fundulus heteroclitus]
g12250.t1	1761.11	2.52127	1.805e-16	672.53	788.869	777.173	707.716	896	768.495	1024.31	1006.22	1127.72	1277.97	1284.06	1777.09	489.743	727.823	885.112	812.607	721	771.046	580.254	633.869	566.554	604.511	565.488	587.969	1304.53	1501.2	1500.93	9964.35	2327.25	3617.75	5326.24	3696.98	SCP2	non-specific lipid-transfer protein-like [Xiphophorus hellerii]
g12253.t1	660.66	2.40405	1.70073e-35	538.805	284.974	249.518	665.272	243	261.786	374.396	294.175	323.535	318.326	299.816	500.563	264.014	325.924	312.01	338.069	321	495.252	492.261	468.036	373.31	392.141	313.647	321.129	265.387	148.078	225.14	2286.08	1578.12	1533.38	1850.73	1858.21	aldh9a1b	aldehyde dehydrogenase family 9 member A1-B-like [Xiphophorus maculatus]
g12270.t1	176.721	2.05655	2.10082e-19	414.841	324.606	281.714	390.305	334	221.635	102.209	161.12	102.414	159.746	115.081	185.693	175.478	100.2	110.504	132.333	117	95.0144	87.1626	92.597	81.6891	58.6814	60.8845	55.2084	125.027	94.9741	90.056	534.625	358.431	452.597	396.865	449.965	fggy	PREDICTED: FGGY carbohydrate kinase domain-containing protein [Cyprinodon variegatus]
g12302.t1	425.644	2.329	4.67677e-07	204.004	170.796	248.624	157.783	194	174.256	191.086	413.716	244.397	317.16	189.783	461.989	148.359	475.673	581.769	493.147	510	80.7202	93.8035	144.788	150.203	98.7337	117.157	125.139	83.7445	137.866	166.175	1221.01	776.318	1674.16	687.638	1378.42	Myo7a	unconventional myosin-VIIa-like [Fundulus heteroclitus]
g12326.t1	437.81	2.06684	1.58195e-07	375.797	441.616	403.343	443.822	528	647.238	492.159	462.572	584.225	489.732	494.646	525.681	281.562	172.872	182.006	186.093	199	231.23	251.526	206.239	129.122	105.254	145.754	136.181	443.492	465.679	472.794	1800.18	455.259	443.515	811.412	1911.38	NDUFB3	PREDICTED: NADH dehydrogenase [ubiquinone] 1 beta subcomplex subunit 3 [Poecilia latipinna]
g12343.t1	198.715	2.957	0.00286044	1.95219	0.943623	2.68299	1.84541	1	2.40908	116.652	94.5933	124.526	99.1124	104.986	161.472	13.5596	241.14	290.343	283.275	225	8.40835	2.49036	0.841791	17.5676	4.65725	4.61246	32.2049	1.1795	1.02123	2.14419	1188.98	623.433	376.912	571.722	378.645	Limd2	uncharacterized protein LOC102237043 [Xiphophorus maculatus]
g12344.t1	10.3998	5.1072	5.18575e-25	0.976096	0.943623	0.89433	0.922707	1	0.803025	1.11097	2.07897	1.1638	1.16603	3.02844	0.897066	0.797626	1.10109	2.16674	2.0677	1	0.840835	0.83012	0.841791	0.878378	0.93145	1.84499	0.92014	2.359	1.02123	1.07209	112.772	22.0834	25.733	9.82339	45.3855	SLC22A13	solute carrier family 22 member 13-like [Fundulus heteroclitus]
g12347.t1	849.858	4.52051	5.30753e-12	20.498	10.3799	42.0335	43.3672	34	20.0756	219.972	172.555	157.112	199.391	277.607	256.561	119.644	350.148	449.598	334.968	425	36.1559	20.753	20.203	96.6215	56.8185	84.8693	55.2084	7.077	16.3396	18.2256	2279.12	3151.14	3575.37	4261.39	3786.45	PLCD1	1-phosphatidylinositol 4,5-bisphosphate phosphodiesterase delta-1-like isoform X1 [Xiphophorus maculatus]
g12350.t1	635.229	2.42717	0.00570955	2.92829	3.77449	2.68299	1.84541	1	4.01513	674.357	673.588	868.191	829.046	721.779	529.269	471.397	823.619	871.028	827.081	701	5.04501	5.81084	5.89254	172.162	42.8467	266.6	31.2848	25.949	14.2972	25.7303	2130.15	1180.61	1660.53	2310.46	1521.06	klhl40a	PREDICTED: kelch-like protein 40a [Poecilia formosa]
g12351.t1	100.84	3.34715	3.62965e-15	3.90439	5.66174	6.26031	6.45895	1	5.62118	14.4426	21.8292	17.4569	22.1545	20.1896	24.2208	38.2861	49.5493	47.6682	41.3541	55	10.09	12.4518	6.73433	21.0811	53.0927	17.5274	14.7222	94.36	51.0613	55.7489	310.472	441.669	422.323	302.561	254.159	vipr1	vasoactive intestinal polypeptide receptor-like [Fundulus heteroclitus]
g12370.t1	2333.87	3.11105	1.58609e-26	393.367	445.39	402.448	279.58	247	463.346	607.699	767.141	681.984	875.687	469.409	517.607	815.174	585.782	537.35	597.566	637	1507.62	1228.58	1369.59	746.621	890.467	1320.09	1035.16	345.593	1841.27	506.029	7275.91	6737.15	5198.06	10615.2	8365.2	Dhrs1	dehydrogenase/reductase SDR family member 1 [Fundulus heteroclitus]
g12400.t1	1382.44	2.55976	0.0820631	0.976096	1.88725	1.78866	2.76812	1	8.03025	1074.31	1223.48	651.725	715.941	878.249	42.1621	88.5365	2286.97	4499.23	2832.75	1048	0.840835	0.83012	0.841791	168.649	0.93145	2.76748	206.111	1.1795	3.06368	2.14419	1726.39	7076.89	9086.76	2031.48	167.278	FABP6	elongation of very long chain fatty acids protein 7-like isoform X1 [Archocentrus centrarchus]
g12403.t1	688.821	3.18484	5.42502e-15	141.534	144.374	118.946	84.8891	216	258.574	108.875	112.265	125.69	111.939	124.166	122.001	224.931	125.525	132.171	109.588	130	342.22	261.488	388.908	360.135	244.971	381.912	474.792	64.8725	892.552	111.498	2234.57	2216.84	1804.33	2858.61	2332.82	LYN	PREDICTED: tyrosine-protein kinase Lyn-like isoform X1 [Poecilia latipinna]
g12412.t1	1350.57	3.43544	1.25219e-51	147.391	115.122	81.384	131.947	131	129.287	383.284	351.347	342.156	409.276	440.134	715.859	807.996	407.405	527.6	444.556	399	602.879	275.6	291.26	484.864	596.128	430.804	468.351	260.669	280.837	288.393	5273.85	4513.52	5055.77	4263.35	4390.73	Slc12a7	solute carrier family 12 member 7 [Fundulus heteroclitus]
g12434.t1	2647.28	2.55632	1.53821e-15	435.339	311.396	358.626	355.242	228	240.105	862.111	1245.31	1173.11	963.139	985.254	782.242	679.578	720.116	822.276	853.961	532	2137.4	2277.02	3093.58	1230.61	1314.28	1362.52	1283.6	2003.97	1542.05	1414.09	12879.7	4578.07	5845.92	7809.6	6788.38	dpyd	PREDICTED: dihydropyrimidine dehydrogenase [NADP(+)] [Poecilia mexicana]
g12459.t1	1960.22	2.39053	1.83215e-39	2450.98	2271.3	2047.12	2363.98	2165	2299.86	1278.72	1207.88	1215	1254.65	1326.46	1636.25	901.318	1170.46	1188.45	1216.84	1198	794.589	776.992	844.317	895.945	814.088	763.824	761.876	1231.4	935.444	1375.5	8225.43	4663	3744.9	5119.95	5129.86	Slc25a12	PREDICTED: calcium-binding mitochondrial carrier protein Aralar1-like [Cyprinodon variegatus]
g12461.t1	506.246	3.03932	2.28611e-39	10.7371	29.2523	25.0412	29.5266	17	29.7119	163.312	271.306	203.664	212.217	259.437	320.253	274.383	244.443	232.924	245.023	232	146.305	157.723	134.687	172.162	120.157	141.141	120.538	233.541	115.399	337.71	1926.88	1262.15	1295.73	2198.48	1466.6	Itga6	PREDICTED: integrin alpha-6 isoform X1 [Cyprinodon variegatus]
g12462.t1	890.276	3.37173	4.97075e-05	2.92829	2.83087	3.57732	47.0581	1	2.40908	943.212	928.262	1350	623.825	582.471	248.487	761.733	887.482	907.862	859.131	535	33.6334	7.47108	10.1015	55.3378	13.0403	58.117	17.4827	58.975	22.467	55.7489	1958.9	2965.98	3340.74	2573.73	4494.47	Itga6	integrin alpha-6 isoform X2 [Fundulus heteroclitus]
g12488.t1	361.751	2.47554	4.68857e-05	163.008	117.953	144.881	200.227	123	93.1509	365.508	382.531	605.174	433.762	414.897	383.944	419.552	400.798	380.262	381.491	274	24.3842	34.865	35.3552	70.2702	45.6411	70.1094	39.566	57.7955	50.0401	58.9652	969.008	757.632	1059.59	1029.49	1269.5	sema4e	PREDICTED: semaphorin-4E-like isoform X1 [Cyprinodon variegatus]
g12499.t1	1177.86	2.16248	4.12071e-23	653.985	614.299	600.095	690.185	648	750.829	948.766	698.535	882.157	795.231	734.902	773.271	618.958	872.067	810.359	773.321	827	628.104	419.21	490.764	616.621	607.306	592.24	541.962	950.677	741.411	1074.24	4304.84	2150.59	2135.83	3504.99	2994.15	UQCR11	PREDICTED: cytochrome b-c1 complex subunit 10-like [Cyprinodon variegatus]
g12517.t1	2662.82	2.30854	1.29585e-20	3056.16	3015.82	3261.62	2851.17	3372	4121.93	3074.05	2670.44	2933.93	2887.09	2415.69	2305.46	1596.05	1065.86	1228.54	1335.74	1308	1588.34	1662.73	1790.49	846.756	868.112	811.794	791.32	1764.53	2082.28	1225.4	11178.4	5362.88	4215.66	7347.9	7530.11	NDUFA13	NADH dehydrogenase [ubiquinone] 1 alpha subcomplex subunit 13 [Seriola dumerili]
g12522.t1	368.066	3.78538	0.000210863	1.95219	2.83087	0.89433	3.69083	1	0.803025	122.206	231.806	159.44	271.685	186.754	357.032	51.8457	213.612	255.675	242.955	350	2.52251	1.66024	0.841791	64.1216	1.8629	1.84499	14.7222	1.1795	1.02123	6.43257	1463.26	1326.71	1475.86	1426.36	1077.58	TM6SF2	transmembrane 6 superfamily member 2 [Fundulus heteroclitus]
g12563.t1	320.874	2.79841	1.48826e-22	223.526	161.36	171.711	252.822	226	256.968	284.408	211.016	263.018	292.673	231.171	174.928	123.632	200.399	232.924	206.77	147	121.08	136.97	126.269	151.081	155.552	108.854	136.181	47.18	28.5943	84.6955	803.33	851.062	1006.61	1045.21	1196.88	AP1S1	AP-1 complex subunit sigma-1A isoform X1 [Fundulus heteroclitus]
g1257.t1	1606.51	3.22809	3.5458e-06	28.3068	16.9852	64.3918	105.189	13	18.4696	208.862	255.714	195.518	264.688	201.896	296.929	238.49	237.836	256.758	267.768	216	1289	1353.1	1231.54	787.905	1090.73	1072.86	941.303	17.6925	2.04245	27.8745	3775.79	4343.64	5444.79	6721.17	6630.18	cxadr	PREDICTED: coxsackievirus and adenovirus receptor homolog [Cyprinodon variegatus]
g12580.t1	181.431	2.4248	1.93387e-11	96.6335	83.0389	96.5876	119.952	86	88.3328	73.3239	142.41	112.888	106.109	92.8723	139.045	147.561	90.2897	48.7516	74.4373	91	104.264	147.761	157.415	61.4864	170.455	103.319	101.215	49.539	27.5731	38.5954	1069.25	270.097	234.624	605.121	324.182	ZK1290.5	PREDICTED: glyoxal reductase-like [Poecilia mexicana]
g12615.t1	564.138	2.39353	1.33953e-12	559.303	561.456	413.18	455.817	371	429.618	332.179	278.583	377.07	333.484	259.437	318.458	156.335	470.167	436.597	445.59	373	174.053	297.183	291.26	267.905	278.504	355.16	250.278	97.8985	86.8043	106.137	1801.57	1768.37	1289.67	1493.16	1416.03	-	uncharacterized protein LOC114145820 [Xiphophorus couchianus]
g12631.t1	5247.7	2.86646	7.62227e-11	36116.5	33586.4	31682.5	27266.9	25095	24582.2	4028.37	4472.91	5134.66	3633.34	3632.11	3505.73	3008.65	3775.65	3394.19	3801.47	3313	952.667	2392.41	2425.2	1581.08	1468.9	1253.67	869.532	537.852	331.899	596.085	7479.18	24169.5	18231	9986.46	22040.5	GLUL	PREDICTED: glutamine synthetase [Poecilia mexicana]
g12637.t1	2044.44	3.32171	3.53872e-60	435.339	485.022	461.474	487.189	389	330.846	611.032	508.309	642.415	507.222	561.272	491.592	392.432	764.16	765.941	802.269	770	755.911	592.706	573.26	1005.74	1142.89	1098.69	893.456	502.467	382.96	662.555	6753.82	5887.79	5523.5	9676.04	6999.75	PRKAG2	PREDICTED: 5'-AMP-activated protein kinase subunit gamma-1-like isoform X1 [Poecilia mexicana]
g12641.t1	2628.51	4.07246	1.60618e-23	54.6614	69.8281	67.9691	138.406	47	53.8027	575.481	957.368	903.105	770.744	833.832	876.434	1251.48	1043.84	1147.29	961.482	944	274.112	243.225	255.063	478.716	800.116	490.766	408.542	147.437	128.675	234.789	6831.78	8923.41	11278.6	10742.9	12466.8	Lama3	laminin subunit alpha-3 isoform X1 [Xiphophorus maculatus]
g12656.t1	8246.76	3.13326	2.30826e-24	364.084	466.15	477.572	629.286	439	367.786	1986.41	2602.88	2179.79	2348.38	2378.34	2519.86	3611.65	3109.49	3230.6	2995.07	2921	3623.16	3086.39	3279.62	4875	6445.64	5034.96	4609.9	1127.6	1187.69	1465.55	26328.9	18934	25613.4	33928	30580.8	DSP	LOW QUALITY PROTEIN: desmoplakin-like [Etheostoma spectabile]
g12659.t1	147.463	2.56543	0.00172108	7.80877	3.77449	11.6263	4.61354	10	6.4242	33.329	31.1846	199.009	225.043	61.5784	16.1472	30.3098	109.008	73.669	94.0805	80	32.7926	35.6952	28.6209	28.1081	27.9435	28.5973	27.6042	5.8975	1.02123	3.21628	82.1429	701.574	290.631	165.033	899.931	IGFBP1	insulin-like growth factor-binding protein 1 [Xiphophorus hellerii]
g12666.t1	524.405	4.7356	2.9597e-08	6.83267	3.77449	5.36598	2.76812	8	8.03025	152.203	164.239	100.086	143.421	186.754	318.458	35.0956	167.366	174.422	215.041	191	3.36334	0.83012	2.52537	26.3513	0.93145	9.22493	9.2014	46.0005	25.5307	28.9466	3902.48	1099.08	968.77	2245.63	2430.07	MEP1B	PREDICTED: meprin A subunit beta [Poecilia formosa]
g12672.t1	400.318	4.00531	2.26307e-13	13.6653	11.3235	1.78866	12.9179	5	7.22723	125.539	145.528	169.914	155.082	112.052	104.957	244.074	237.836	235.091	187.127	136	15.9759	24.0735	37.8806	69.3918	44.7096	52.5821	57.0487	17.6925	28.5943	56.821	146.187	1962.03	2272.07	996.092	2247.23	Foxq1	forkhead box protein Q1 [Fundulus heteroclitus]
g12692.t1	76.4655	3.00958	0.00011301	141.534	168.909	127.889	138.406	125	121.257	66.6581	31.1846	37.2414	73.4598	82.7775	115.722	27.9169	53.9536	46.5848	53.7603	56	1.68167	0.83012	0.841791	14.054	0.93145	3.68997	2.76042	16.513	28.5943	16.0814	495.642	180.065	151.37	222.009	169.872	Klhl14	kelch-like protein 14 isoform X1 [Oryzias melastigma]
g12694.t1	940.377	2.23745	0.000283199	646.176	644.495	676.113	672.654	541	446.482	1009.87	824.313	640.087	1087.9	977.178	707.785	817.567	924.919	983.698	707.155	1014	66.426	65.5795	62.2926	177.432	88.4878	153.134	63.4897	909.394	566.781	1052.8	3218.89	2315.36	1745.3	3489.27	1587.2	DTNA	PREDICTED: dystrobrevin alpha isoform X4 [Poecilia formosa]
g12696.t1	846.622	2.06619	8.09268e-37	283.068	237.793	258.461	264.817	195	212.802	418.835	391.887	418.966	431.43	389.66	537.343	425.933	316.014	370.512	434.218	412	485.162	598.516	548.848	465.54	511.366	569.178	581.528	832.727	534.102	741.89	2421.13	1630.78	1663.56	2483.35	2339.3	SPIDR	PREDICTED: DNA repair-scaffolding protein isoform X2 [Poecilia latipinna]
g12729.t1	2486.64	2.3706	1.03105e-21	1215.24	1372.03	1347.76	1045.43	1356	1388.43	1197.62	1193.33	1395.39	914.166	1077.12	1348.29	852.663	1398.39	1409.46	1536.3	1477	747.503	782.803	813.17	1538.04	1191.33	1434.48	1532.95	2035.82	1840.25	2486.19	5995.04	4815.89	6481.68	9428.49	7237.05	Higd1a	PREDICTED: HIG1 domain family member 1A, mitochondrial [Cyprinodon variegatus]
g1273.t1	8195.69	2.2754	6.64858e-35	4820.94	5336.19	5475.09	4551.71	5687	6926.09	5901.46	5431.32	5771.26	5811.48	5265.46	5577.06	2755.8	4961.53	4919.57	5257.14	5750	3573.55	3552.91	3760.28	4095	3934.45	4499.92	4162.71	5049.44	5863.88	6734.9	19428.9	17828.1	17442.4	30505.6	23739.2	LOC100335037	cytochrome c oxidase subunit 6A, mitochondrial [Fundulus heteroclitus]
g12751.t1	1908.36	3.07489	9.4102e-45	652.032	688.845	648.389	680.035	616	781.344	1027.65	1068.59	1155.65	1086.74	1117.5	1325.86	591.041	753.149	783.275	801.235	694	572.609	705.602	627.976	456.756	561.665	447.409	426.025	1168.88	815.96	1047.44	8279.73	5678.84	4875.64	5939.22	6186.7	pter	phosphotriesterase-related protein [Xiphophorus maculatus]
g12753.t1	1511.16	2.11574	6.04846e-08	493.905	742.632	643.918	380.155	514	435.24	799.897	1115.37	897.286	932.822	832.822	1087.24	571.101	869.865	919.779	710.256	709	560.837	630.061	780.341	366.283	432.193	390.214	359.775	2441.56	1549.2	2492.62	5989.47	3227.58	3178.78	3644.48	3052.5	gpt2l	alanine aminotransferase 2-like isoform X1 [Xiphophorus maculatus]
g12762.t1	2482.81	3.17381	3.73809e-73	386.534	314.227	339.845	339.556	429	402.316	1400.93	1411.62	1685.18	1617.28	1191.19	1439.79	763.329	730.026	836.36	795.032	870	1004.8	987.012	1101.06	695.675	821.539	805.336	718.629	582.673	1454.23	857.676	9440.86	6752.44	5518.96	9744.81	9634.7	ATP5MG	ATP synthase subunit g, mitochondrial [Xiphophorus hellerii]
g12772.t1	115.811	2.19997	0.00800154	1.95219	1.88725	5.36598	17.5314	6	15.2575	85.5445	82.1195	69.8277	55.9693	45.4267	64.5888	55.8339	49.5493	73.669	45.4895	37	4.20418	13.2819	3.36717	8.78378	2.79435	6.45745	4.6007	1213.71	535.123	884.478	264.528	292.181	301.227	324.172	324.182	TRIM25	PREDICTED: E3 ubiquitin/ISG15 ligase TRIM25-like [Poecilia mexicana]
g12780.t1	158.978	3.36505	4.95012e-08	33.1873	26.4215	37.5619	35.0629	24	14.4545	21.1084	50.9349	32.5863	52.4713	32.3034	31.3973	19.9407	80.3799	98.5865	63.0649	111	12.6125	6.64096	9.2597	9.66215	10.246	10.1474	14.7222	220.566	87.8255	128.651	613.983	535.099	679.653	367.395	534.253	Pde1c	calcium/calmodulin-dependent 3',5'-cyclic nucleotide phosphodiesterase 1C isoform X1 [Xiphophorus hellerii]
g1279.t1	1014.97	4.77998	1.88018e-09	13.6653	20.7597	13.4149	17.5314	10	16.0605	257.745	306.649	172.242	326.488	333.129	514.916	60.6196	353.451	372.679	374.254	343	9.24919	19.9229	9.2597	55.3378	5.5887	28.5973	73.6112	3.5385	8.16981	20.3698	3469.49	3636.97	3478.49	5675.96	4550.23	hnf1a	PREDICTED: hepatocyte nuclear factor 1-alpha [Poecilia mexicana]
g12800.t1	20.3684	2.95988	7.65938e-05	11.7132	5.66174	6.26031	1.84541	2	4.81815	13.3316	10.3949	22.1121	12.8263	9.08533	21.5296	6.38101	20.9208	16.2505	19.6432	25	0.840835	1.66024	0.841791	4.39189	0.93145	1.84499	3.68056	2.359	1.02123	5.36047	224.153	35.6733	15.137	33.3995	10.3738	tmem236	transmembrane protein 236-like [Xiphophorus couchianus]
g12805.t1	1611.3	2.42115	0.00045717	555.399	258.553	273.665	441.054	352	333.255	524.377	972.96	640.087	895.509	970.112	2289.31	857.448	1346.64	1631.55	1564.22	1842	505.342	207.53	228.125	1122.57	511.366	469.549	983.63	89.642	314.538	108.282	17220.8	2038.47	1288.16	895.894	608.166	-	PREDICTED: MAM and LDL-receptor class A domain-containing protein 1-like [Poecilia latipinna]
g12835.t1	5.96754	2.69441	4.33514e-07	0.976096	0.943623	1.78866	0.922707	1	0.803025	2.22194	1.03949	1.1638	2.33206	1.00948	1.79413	0.797626	1.10109	3.2501	3.10155	1	0.840835	0.83012	2.52537	0.878378	7.4516	10.1474	1.84028	1.1795	3.06368	1.07209	27.845	13.5898	13.6233	13.7528	19.4509	-	-
g12838.t1	8.33625	3.76473	3.96089e-15	0.976096	0.943623	0.89433	0.922707	1	0.803025	3.3329	4.15795	4.65518	4.66411	2.01896	4.48533	0.797626	5.50547	2.16674	4.13541	4	1.68167	0.83012	2.52537	0.878378	0.93145	0.922493	1.84028	1.1795	1.02123	1.07209	62.6514	11.8911	10.5959	41.2583	24.6379	SLC1A3	PREDICTED: excitatory amino acid transporter 1-like [Poecilia latipinna]
g12842.t1	2554.57	2.26777	1.15037e-12	610.06	543.527	408.709	679.112	474	982.1	1124.3	1225.56	1263.88	1154.37	1211.38	1293.57	1839.33	1779.37	1094.2	1420.51	1319	2184.49	1081.65	1102.75	1413.31	2014.73	1599.6	1761.15	261.849	2854.33	899.487	3234.2	7115.96	7453.47	6903.88	9271.62	KLF2	PREDICTED: Krueppel-like factor 2 [Poecilia formosa]
g12844.t1	8261.64	2.02234	1.71256e-07	508.546	721.872	816.523	907.021	492	688.193	9357.68	8372.03	9480.28	8579.63	8249.48	9468.53	6807.74	6892.85	6600.96	6092.49	5966	5019.79	4477.67	5246.04	5159.59	6437.25	5138.28	4351.34	1334.01	1167.26	1213.61	17255.6	17537.6	19729.6	24043.7	23001.4	-	-
g12850.t1	923.758	2.50475	0.0389641	0.976096	4.71812	0.89433	9.22707	3	1.60605	847.668	966.723	1092.8	755.586	654.144	557.078	299.11	1729.82	1544.88	1547.68	1322	4.20418	0.83012	0.841791	229.257	0.93145	54.4271	75.4515	2.359	2.04245	36.4512	1545.4	740.645	3272.63	3748.61	3757.92	CCL25	C-C motif chemokine 25-like [Xiphophorus maculatus]
g12854.t1	1980.07	2.25865	5.40712e-25	1394.84	1311.64	1173.36	1205.06	1013	873.691	1073.19	1262.98	999.7	1026.1	1101.34	1415.57	1877.61	1220.01	1422.46	1102.09	1398	1118.31	1112.36	1116.22	1016.28	1319.87	965.85	1000.19	840.983	436.064	702.222	8158.6	4292.68	4261.07	5420.55	4003.01	ptprf	PREDICTED: LOW QUALITY PROTEIN: receptor-type tyrosine-protein phosphatase F isoform X3 [Poecilia reticulata]
g12879.t1	253.329	2.74372	1.02996e-09	42.9482	74.5462	54.5541	28.6039	57	48.1815	124.428	145.528	162.931	144.587	160.508	183.001	338.194	137.637	151.671	102.351	130	65.5852	63.0891	106.907	28.9865	31.6693	81.1794	17.4827	234.72	95.9953	122.219	1113.8	596.253	635.755	783.907	680.783	APCDD1	PREDICTED: protein APCDD1 [Poecilia reticulata]
g12902.t1	3040.73	3.64954	1.35145e-48	309.423	284.031	385.456	379.233	374	304.347	749.903	1021.82	914.743	975.965	848.974	1023.55	357.337	615.512	731.273	604.803	555	1002.28	1098.25	1017.73	679.864	828.059	842.236	702.067	1775.15	1325.55	1465.55	14624.2	8476.64	7594.25	13240	10727.8	Gipc1	PDZ domain-containing protein GIPC1 [Fundulus heteroclitus]
g12928.t1	2358.57	2.77902	3.52713e-34	1193.77	685.071	714.57	1176.45	619	591.027	955.432	982.315	917.071	930.49	772.253	779.55	1118.27	1196.89	1108.29	997.667	937	1417.65	1380.49	1281.21	1140.13	1332.91	1208.47	1347.08	383.337	478.955	568.21	7458.3	7027.63	7517.05	7245.74	6639.26	Tep1	PREDICTED: telomerase protein component 1 [Cyprinodon variegatus]
g12934.t1	1224.45	3.46221	8.37307e-77	371.893	462.375	449.848	445.668	475	589.421	636.585	638.245	642.415	654.142	593.575	585.784	311.074	313.812	343.428	351.51	369	537.294	477.319	548.848	310.946	379.1	369.92	338.611	279.541	263.476	294.826	4389.77	3222.48	3216.62	6522.73	4026.35	SDR39U1	epimerase family protein SDR39U1 [Fundulus heteroclitus]
g12936.t1	68.5654	3.56311	8.82855e-06	0.976096	2.83087	0.89433	2.76812	1	1.60605	86.6555	87.3169	105.905	48.9732	32.3034	24.2208	47.06	63.8635	57.4185	62.0311	39	3.36334	0.83012	0.841791	6.14864	0.93145	6.45745	4.6007	2.359	1.02123	2.14419	86.3197	217.437	310.309	300.596	306.028	LTB4R	PREDICTED: leukotriene B4 receptor 1-like [Poecilia latipinna]
g12966.t1	499.325	2.3618	2.74871e-25	167.889	184.95	183.338	167.01	182	224.847	668.803	604.981	734.355	595.84	427.011	296.929	211.371	277.476	309.843	364.95	304	245.524	198.399	239.069	193.243	135.992	177.119	132.5	333.798	392.151	330.205	1928.27	1010.74	1038.4	1255.43	1553.48	APOO	MICOS complex subunit MIC26-like [Xiphophorus maculatus]
g12993.t1	430.608	2.31027	3.33324e-27	136.653	122.671	132.361	111.648	117	97.9691	208.862	291.056	253.707	241.368	225.114	174.031	278.372	343.541	314.177	248.124	289	190.029	150.252	182.669	184.459	201.193	169.739	182.188	173.386	422.788	322.701	1729.18	1061.7	985.421	1143.44	854.545	ncoa2	PREDICTED: nuclear receptor coactivator 2-like isoform X2 [Poecilia reticulata]
g13038.t1	46.7802	3.41226	3.16073e-05	0.976096	0.943623	0.89433	0.922707	2	0.803025	22.2194	30.1451	23.2759	38.4789	39.3698	43.9562	39.0837	38.5383	34.6678	22.7447	32	0.840835	0.83012	0.841791	5.27027	0.93145	1.84499	0.92014	4.718	1.02123	3.21628	83.5351	181.764	208.891	149.316	189.323	IL20RB	PREDICTED: interleukin-20 receptor subunit beta-like isoform X2 [Cyprinodon variegatus]
g13039.t1	4368.61	5.14241	6.36469e-08	0.976096	0.943623	2.68299	0.922707	2	4.01513	979.874	1745.3	893.795	1252.31	1210.37	2535.11	546.374	1005.3	1324.96	1165.15	1022	42.8826	19.9229	12.6269	239.797	17.6976	43.3572	40.4862	4.718	9.19104	140.444	26942.9	12140.8	13979	21122.3	17421.6	CLDN15	PREDICTED: claudin-15-like [Cyprinodon variegatus]
g13078.t1	483.564	2.45808	0.000257105	204.004	359.52	522.289	378.31	409	531.603	327.735	356.544	427.113	325.322	369.47	268.223	1773.12	247.746	293.593	196.432	259	109.309	83.012	308.937	115.067	135.992	79.3344	46.9271	14.154	26.5519	49.3164	769.916	1277.44	1904.24	1147.37	1687.05	LAMC2	laminin subunit gamma-2-like [Fundulus heteroclitus]
g1311.t1	1301.67	2.12815	8.25666e-17	332.849	409.533	338.951	290.653	419	550.072	533.265	654.877	704.096	645.979	575.404	650.373	590.244	681.577	630.52	599.634	651	521.318	575.273	625.451	706.216	929.587	808.104	690.105	1328.12	1125.39	1773.24	2157.99	3030.53	2844.25	5538.43	3003.23	Tango2	transport and Golgi organization protein 2 homolog isoform X1 [Fundulus heteroclitus]
g13117.t1	915.256	2.53318	1.00419e-14	90.777	130.22	190.492	58.1306	78	85.1207	583.258	668.39	841.424	479.237	822.727	1246.02	928.437	367.766	452.848	446.624	489	232.911	399.288	438.573	321.486	452.685	356.082	231.875	268.926	202.203	370.945	1857.26	2554.88	2801.86	2764.3	3123.82	Erfe	PREDICTED: erythroferrone-like [Cyprinodon variegatus]
g13164.t1	15.7729	3.92333	2.9619e-20	0.976096	0.943623	3.57732	0.922707	1	0.803025	1.11097	5.19744	3.49139	1.16603	1.00948	2.6912	0.797626	1.10109	3.2501	1.03385	3	4.20418	4.1506	3.36717	9.66215	13.0403	7.37994	7.36112	1.1795	4.08491	2.14419	45.9443	44.1669	54.4933	88.4106	63.5398	BTN2A2	PREDICTED: butyrophilin subfamily 2 member A1-like [Poecilia reticulata]
g13168.t1	281.828	5.32241	4.08369e-12	0.976096	0.943623	1.78866	2.76812	7	1.60605	63.3252	85.2379	72.1553	69.9617	36.3413	22.4267	7.17864	88.0876	108.337	133.367	76	4.20418	3.32048	2.52537	17.5676	3.7258	5.53496	9.2014	3.5385	1.02123	9.64885	828.39	1012.44	1463.75	1428.32	1265.61	BTN3A3	uncharacterized protein LOC111611120 [Xiphophorus maculatus]
g13170.t1	4.74899	3.46038	2.57122e-12	0.976096	0.943623	0.89433	0.922707	1	0.803025	2.22194	1.03949	1.1638	1.16603	1.00948	3.58826	0.797626	3.30328	6.50021	1.03385	1	0.840835	0.83012	0.841791	0.878378	0.93145	0.922493	0.92014	1.1795	1.02123	1.07209	9.74577	10.1924	9.08222	31.4349	22.0444	-	uncharacterized protein LOC111610762 [Xiphophorus maculatus]
g13171.t1	430.537	6.92905	4.06175e-16	0.976096	0.943623	0.89433	0.922707	1	0.803025	25.5523	32.2241	12.8017	32.6488	24.2276	15.2501	1.59525	50.6503	50.9183	62.0311	42	0.840835	0.83012	0.841791	18.4459	0.93145	8.30243	1.84028	1.1795	1.02123	5.36047	1229.36	1584.91	2073.77	2383.16	2428.78	BTN2A2	butyrophilin subfamily 3 member A2-like isoform X1 [Xiphophorus couchianus]
g13231.t1	1.99824	2.17258	0.000240301	0.976096	0.943623	0.89433	0.922707	1	0.803025	1.11097	1.03949	1.1638	1.16603	1.00948	0.897066	2.39288	1.10109	1.08337	1.03385	1	0.840835	0.83012	0.841791	0.878378	0.93145	0.922493	0.92014	1.1795	2.04245	1.07209	2.7845	3.39745	7.56851	3.92936	7.78038	-	PREDICTED: uncharacterized protein LOC103149057 [Poecilia formosa]
g13241.t1	557.77	3.6041	7.39593e-05	1.95219	0.943623	8.04897	2.76812	1	1.60605	828.782	681.904	1252.24	376.627	429.03	45.7504	62.2149	404.102	750.774	524.163	472	5.88585	6.64096	4.20896	50.9459	3.7258	77.4894	11.9618	28.308	23.4882	37.5233	426.029	2255.91	3042.54	2351.72	1947.69	UMOD	uncharacterized protein LOC105923669 [Fundulus heteroclitus]
g13242.t1	658.078	3.78118	2.53093e-05	0.976096	8.49261	14.3093	1.84541	1	4.81815	705.465	476.085	531.854	534.041	647.078	107.648	105.287	334.733	700.939	508.655	522	4.20418	9.13132	5.89254	42.1621	3.7258	47.0471	11.9618	16.513	28.5943	54.6768	815.86	2736.65	3233.27	2127.75	3222.37	Umod	uncharacterized protein LOC105923669 [Fundulus heteroclitus]
g13243.t1	562.738	3.68654	0.000100268	0.976096	0.943623	3.57732	2.76812	2	2.40908	1003.2	960.486	1176.6	450.087	529.978	67.28	129.215	594.591	574.185	495.215	289	2.52251	4.98072	6.73433	45.6756	5.5887	46.1246	12.882	7.077	5.10613	12.8651	703.087	3213.99	2503.66	1273.11	2570.12	UMOD	uncharacterized protein LOC105923669 [Fundulus heteroclitus]
g13244.t1	1390.55	3.84512	4.88023e-05	1.95219	9.43623	20.5696	2.76812	5	5.62118	746.57	1303.52	600.518	861.695	1248.73	253.87	628.53	1179.27	1269.71	748.509	750	4.20418	5.81084	6.73433	115.067	5.5887	76.5669	19.3229	36.5645	22.467	47.1722	2184.44	7265.45	6704.19	3687.7	6079.07	UMOD	uncharacterized protein LOC105923669 [Fundulus heteroclitus]
g13250.t1	97.6448	3.22494	4.26023e-06	0.976096	0.943623	4.47165	2.76812	2	4.81815	57.7703	58.2113	54.6984	75.7918	69.6542	69.0741	35.8932	102.402	100.753	56.8618	79	5.04501	10.7916	1.68358	19.3243	7.4516	12.9149	11.0417	1.1795	3.06368	8.57676	459.443	334.649	310.309	133.598	394.206	Gimd1	GTPase IMAP family member GIMD1 [Xiphophorus couchianus]
g13261.t1	252.2	4.45779	4.0862e-08	0.976096	2.83087	0.89433	2.76812	3	1.60605	103.32	141.37	101.25	172.572	115.081	182.104	26.3217	110.109	105.087	106.487	82	6.72668	2.49036	3.36717	22.8378	1.8629	3.68997	8.28126	4.718	1.02123	4.28838	1236.32	1075.29	879.461	886.07	947.91	cptp	ceramide-1-phosphate transfer protein [Fundulus heteroclitus]
g13278.t1	2.07449	2.0538	0.000551845	0.976096	0.943623	0.89433	0.922707	1	0.803025	1.11097	1.03949	1.1638	1.16603	1.00948	0.897066	0.797626	1.10109	1.08337	1.03385	1	2.52251	0.83012	0.841791	0.878378	1.8629	1.84499	0.92014	2.359	1.02123	1.07209	2.7845	5.09618	6.05481	9.82339	2.59346	-	uncharacterized protein LOC105924211 [Fundulus heteroclitus]
g13286.t1	21206.5	2.08538	2.05127e-05	588.586	508.613	538.387	655.122	515	611.102	40304.8	33802	38155	45886.7	27769.8	10866.2	12220.4	32619.9	28177.3	25937.3	22393	7418.69	4192.1	4889.12	9242.29	8689.5	7687.13	6470.42	3267.21	4527.1	2983.64	49810.6	47902.4	45618.5	72372.9	50376.7	ENO3	PREDICTED: beta-enolase [Cyprinodon variegatus]
g13300.t1	59.9733	4.63791	8.88201e-16	6.83267	5.66174	9.83763	5.53624	8	8.03025	16.6645	12.4738	8.14657	15.1584	21.1991	31.3973	10.3691	16.5164	30.3343	8.27081	12	3.36334	0.83012	1.68358	4.39189	0.93145	0.922493	2.76042	8.2565	6.12736	9.64885	410.714	290.482	172.562	237.726	102.442	SLC9B2	PREDICTED: mitochondrial sodium/hydrogen exchanger 9B2-like [Cyprinodon variegatus]
g13305.t1	9.03462	2.51002	4.82492e-05	0.976096	0.943623	0.89433	2.76812	1	0.803025	6.66581	3.11846	8.14657	3.49808	5.04741	1.79413	3.98813	8.80876	8.66694	7.23696	8	1.68167	0.83012	0.841791	0.878378	0.93145	3.68997	0.92014	5.8975	4.08491	4.28838	1.39225	33.9745	34.8152	13.7528	44.0888	-	PREDICTED: CD226 antigen-like isoform X2 [Poecilia latipinna]
g13327.t1	14.7929	5.4799	1.43911e-38	0.976096	0.943623	0.89433	0.922707	1	0.803025	1.11097	7.27641	1.1638	1.16603	3.02844	5.3824	0.797626	1.10109	1.08337	1.03385	2	0.840835	0.83012	1.68358	0.878378	0.93145	0.922493	0.92014	1.1795	1.02123	1.07209	71.0049	50.9618	66.6029	108.057	20.7477	Btnl2	coxsackievirus and adenovirus receptor homolog [Fundulus heteroclitus]
g13328.t1	25.4056	4.91621	2.32878e-29	0.976096	0.943623	0.89433	0.922707	1	0.803025	2.22194	11.4344	3.49139	1.16603	4.03793	13.456	7.97626	3.30328	2.16674	5.16926	2	1.68167	5.81084	0.841791	5.27027	1.8629	3.68997	0.92014	1.1795	1.02123	1.07209	93.2809	117.212	99.9044	161.104	57.0561	Btnl2	coxsackievirus and adenovirus receptor homolog [Fundulus heteroclitus]
g13329.t1	173.612	5.81331	5.4735e-15	0.976096	0.943623	0.89433	0.922707	1	0.803025	18.8865	28.0662	20.9483	17.4904	32.3034	52.9269	7.97626	24.2241	35.7511	28.9478	30	0.840835	0.83012	1.68358	10.5405	0.93145	1.84499	2.76042	1.1795	2.04245	2.14419	755.993	842.568	794.694	821.236	574.451	SLC9B2	PREDICTED: mitochondrial sodium/hydrogen exchanger 9B2-like [Cyprinodon variegatus]
g13330.t1	59.5004	5.45226	1.20245e-25	0.976096	0.943623	1.78866	0.922707	1	0.803025	6.66581	15.5923	2.32759	4.66411	16.1517	12.5589	3.98813	12.112	11.917	12.4062	6	2.52251	0.83012	0.841791	3.51351	0.93145	3.68997	2.76042	1.1795	2.04245	1.07209	274.274	298.976	169.535	161.104	370.865	SLC9B2	PREDICTED: mitochondrial sodium/hydrogen exchanger 9B2-like [Cyprinodon variegatus]
g13331.t1	772.269	6.27532	6.71672e-15	1.95219	0.943623	0.89433	0.922707	1	0.803025	115.541	80.0405	61.6811	124.765	120.128	193.766	30.3098	79.2788	95.3364	88.9112	79	5.88585	2.49036	1.68358	24.5946	0.93145	9.22493	7.36112	3.5385	2.04245	10.7209	6368.16	2811.39	2297.8	3691.63	1882.85	SLC9B2	PREDICTED: mitochondrial sodium/hydrogen exchanger 9B2-like [Cyprinodon variegatus]
g13351.t1	3.4071	3.34399	3.94346e-09	0.976096	0.943623	0.89433	1.84541	1	0.803025	1.11097	1.03949	1.1638	1.16603	2.01896	1.79413	0.797626	2.20219	1.08337	2.0677	1	0.840835	0.83012	0.841791	0.878378	0.93145	0.922493	0.92014	1.1795	1.02123	1.07209	34.8063	6.7949	4.54111	1.96468	9.07711	-	PREDICTED: butyrophilin subfamily 1 member A1-like [Poecilia mexicana]
g13353.t1	19.0236	3.25638	1.18151e-08	0.976096	0.943623	0.89433	3.69083	1	1.60605	1.11097	2.07897	1.1638	4.66411	2.01896	8.07359	1.59525	2.20219	2.16674	2.0677	2	14.2942	17.4325	5.89254	3.51351	13.0403	3.68997	12.882	1.1795	1.02123	3.21628	52.9056	35.6733	101.418	55.011	75.2103	Ermap	butyrophilin subfamily 1 member A1-like [Fundulus heteroclitus]
g13355.t1	81.3276	6.30555	1.45003e-51	0.976096	0.943623	0.89433	0.922707	1	0.803025	1.11097	3.11846	1.1638	2.33206	7.06637	0.897066	0.797626	2.20219	5.41684	2.0677	1	6.72668	9.13132	4.20896	5.27027	9.3145	5.53496	10.1215	2.359	1.02123	1.07209	403.753	630.227	367.83	206.291	206.18	-	-
g13358.t1	55.9322	6.56111	4.63912e-53	0.976096	0.943623	0.89433	0.922707	1	0.803025	1.11097	4.15795	1.1638	4.66411	2.01896	2.6912	0.797626	3.30328	7.58357	9.30466	7	0.840835	0.83012	0.841791	1.75676	0.93145	0.922493	2.76042	1.1795	1.02123	1.07209	140.617	346.54	313.337	247.55	206.18	BTN1A1	butyrophilin subfamily 1 member A1-like isoform X2 [Xiphophorus couchianus]
g13377.t1	178.37	2.25469	9.86787e-09	108.347	137.769	138.621	179.928	118	154.181	18.8865	43.6585	43.0604	44.3091	38.3603	35.8826	51.8457	85.8854	73.669	74.4373	92	70.6302	96.2939	95.9642	186.216	184.427	119.924	216.233	126.206	81.6981	120.075	96.0654	208.943	505.577	945.011	601.683	-	uncharacterized protein LOC111611202 isoform X1 [Xiphophorus maculatus]
g13387.t1	2802.82	5.49221	4.00269e-09	1.95219	1.88725	2.68299	4.61354	3	1.60605	965.431	615.376	1031.12	412.774	903.486	1196.69	44.6671	717.914	464.765	857.063	211	13.4534	7.47108	7.57612	50.9459	4.65725	55.3496	20.2431	117.95	23.4882	87.9118	27598.6	4810.79	1513.7	23454.3	2339.3	TGL2	protein-glutamine gamma-glutamyltransferase 2-like [Fundulus heteroclitus]
g134.t1	118.43	3.22507	1.69167e-06	4.88048	5.66174	4.47165	15.686	8	6.4242	119.985	125.778	138.492	148.086	112.052	114.824	102.894	74.8744	67.1688	76.505	67	15.135	5.81084	9.2597	28.1081	21.4234	35.0547	7.36112	2.359	2.04245	2.14419	335.533	441.669	398.104	343.819	466.823	Rspo2	R-spondin-2-like [Xiphophorus maculatus]
g13400.t1	209.638	3.39556	3.31628e-09	191.315	219.864	236.103	226.986	202	133.302	147.759	264.03	183.88	180.734	173.631	202.737	190.633	91.3908	94.253	83.742	102	19.3392	13.2819	10.1015	28.1081	11.1774	15.6824	23.0035	50.7185	27.5731	36.4512	1616.41	477.342	469.248	601.192	435.701	FBXW7	PREDICTED: F-box/WD repeat-containing protein 7-like [Cyprinodon variegatus]
g13405.t1	26.5775	3.59327	1.99161e-06	8.78487	6.60536	5.36598	12.9179	8	16.0605	68.88	13.5133	55.8622	10.4943	10.0948	4.48533	3.98813	27.5274	14.0838	29.9817	5	0.840835	0.83012	1.68358	3.51351	0.93145	16.6049	0.92014	1.1795	2.04245	10.7209	4.17676	120.61	115.041	15.7174	220.444	-	uncharacterized protein LOC111611185 [Xiphophorus maculatus]
g13422.t1	27.7191	4.2137	1.37321e-08	0.976096	0.943623	0.89433	1.84541	1	4.81815	7.77677	1.03949	6.98277	4.66411	2.01896	0.897066	9.57152	13.2131	13.0004	18.6093	9	0.840835	0.83012	1.68358	0.878378	0.93145	21.2173	1.84028	2.359	1.02123	2.14419	2.7845	159.68	90.8222	53.0463	234.708	-	uncharacterized protein LOC110367208 isoform X1 [Fundulus heteroclitus]
g1344.t1	56.4806	2.28573	1.18452e-25	28.3068	16.0416	9.83763	17.5314	24	19.2726	17.7755	27.0267	17.4569	45.4751	18.1707	23.3237	22.3335	30.8306	33.5844	53.7603	24	46.2459	39.8458	36.197	38.6486	39.1209	33.2097	25.7639	30.667	14.2972	28.9466	189.346	124.007	116.555	163.068	159.498	-	uncharacterized protein LOC105938798 isoform X1 [Fundulus heteroclitus]
g13443.t1	102.041	2.25913	0.0188797	0.976096	1.88725	1.78866	3.69083	1	1.60605	95.5432	114.344	146.638	86.2861	52.493	62.7946	70.1911	177.276	199.34	164.382	57	0.840835	1.66024	0.841791	12.2973	0.93145	4.61246	6.44098	2.359	3.06368	70.7583	83.5351	270.097	393.563	243.62	363.084	-	PREDICTED: uncharacterized protein LOC107089403 [Cyprinodon variegatus]
g13475.t1	490.887	3.73548	6.76278e-15	13.6653	18.8725	30.4072	28.6039	11	8.83328	503.268	288.977	524.872	374.295	356.347	247.59	299.11	189.388	299.01	209.872	113	78.1977	46.4867	69.8687	49.1891	27.0121	49.8146	25.7639	62.5135	59.2311	55.7489	2263.8	1858.41	1531.87	1520.66	1783	cmas	PREDICTED: N-acylneuraminate cytidylyltransferase-like [Cyprinodon variegatus]
g13477.t1	640.622	2.85326	9.13336e-16	19.5219	22.647	35.7732	49.8262	28	22.4847	256.634	384.61	295.604	293.839	252.37	326.532	130.013	199.298	248.091	218.143	188	533.93	507.203	551.373	215.203	258.943	319.182	288.004	123.847	89.8679	82.5513	3729.84	1297.83	1404.72	1825.19	1609.24	cmas	PREDICTED: N-acylneuraminate cytidylyltransferase-like [Cyprinodon variegatus]
g13490.t1	1405.64	2.07744	2.49295e-09	925.339	778.489	757.497	848.891	925	959.615	728.795	633.048	739.01	917.664	783.358	766.992	494.528	433.831	450.681	514.858	490	2043.23	1771.48	2116.26	794.932	844.825	829.321	754.515	450.569	528.995	517.822	4212.96	2813.09	2408.3	4127.79	3997.82	tmem256	PREDICTED: transmembrane protein 256 [Cyprinodon variegatus]
g1351.t1	867.231	4.67419	4.95448e-09	22.4502	47.1812	22.3582	24.9131	13	32.121	301.072	165.278	165.259	278.681	236.219	221.575	29.5122	430.528	450.681	359.78	235	20.18	9.96144	5.89254	56.2162	8.38305	16.6049	75.4515	2.359	8.16981	22.514	3580.87	3411.04	3308.95	3717.17	3608.8	UPB1	beta-ureidopropionase [Fundulus heteroclitus]
g13512.t1	444.066	5.26522	2.3063e-14	4.88048	9.43623	0.89433	5.53624	1	4.01513	75.5458	98.7513	98.9226	100.278	104.986	172.237	68.5959	84.7843	104.003	143.705	78	2.52251	6.64096	3.36717	21.0811	5.5887	7.37994	18.4028	16.513	6.12736	10.7209	1690.19	1787.06	1902.72	1781.96	2256.31	TRIM21	E3 ubiquitin-protein ligase TRIM39-like isoform X1 [Xiphophorus hellerii]
g13518.t1	53.8239	3.11357	0.000709048	7.80877	0.943623	1.78866	0.922707	2	4.01513	43.3277	13.5133	19.7845	25.6526	31.2939	2.6912	7.17864	66.0657	78.0025	68.2342	10	0.840835	0.83012	1.68358	2.63513	0.93145	14.7599	5.52084	2.359	2.04245	1.07209	27.845	232.725	225.542	94.3046	304.732	UMOD	uncharacterized protein LOC102223628 [Xiphophorus maculatus]
g1352.t1	3.89064	2.2978	2.9329e-06	2.92829	3.77449	2.68299	2.76812	6	3.2121	2.22194	1.03949	1.1638	1.16603	6.05689	0.897066	2.39288	1.10109	2.16674	2.0677	4	1.68167	0.83012	2.52537	0.878378	1.8629	0.922493	1.84028	1.1795	1.02123	3.21628	9.74577	1.69873	10.5959	13.7528	15.5608	C22orf15	PREDICTED: uncharacterized protein C22orf15 homolog isoform X1 [Poecilia reticulata]
g13520.t1	3.67723	2.04397	0.00618209	0.976096	0.943623	0.89433	0.922707	1	0.803025	5.55484	1.03949	3.49139	2.33206	1.00948	0.897066	0.797626	1.10109	6.50021	2.0677	1	0.840835	0.83012	0.841791	1.75676	0.93145	1.84499	0.92014	1.1795	1.02123	1.07209	1.39225	16.9873	6.05481	3.92936	16.8575	NCAN	uncharacterized protein LOC102223628 [Xiphophorus maculatus]
g13521.t1	12.6512	3.67651	1.13063e-07	0.976096	0.943623	0.89433	0.922707	1	0.803025	14.4426	7.27641	25.6035	8.1622	18.1707	0.897066	0.797626	6.60657	9.75031	10.3385	2	0.840835	0.83012	0.841791	2.63513	0.93145	3.68997	2.76042	1.1795	1.02123	1.07209	2.7845	50.9618	68.1166	29.4702	77.8038	Oit3	uncharacterized protein LOC116732421 [Xiphophorus hellerii]
g13547.t1	756.783	4.03564	1.12287e-17	44.9004	49.0684	29.5129	23.9904	19	48.1815	215.528	505.191	265.345	333.484	393.698	702.403	275.181	183.883	163.589	252.26	213	112.672	128.669	117.009	86.081	67.0644	101.474	68.0904	41.2825	53.1038	27.8745	4233.84	2454.66	1990.52	2501.04	3174.39	-	uncharacterized protein LOC116732042 isoform X1 [Xiphophorus hellerii]
g13562.t1	781.256	2.26374	2.50842e-10	272.331	309.508	354.155	307.261	315	254.559	217.75	284.819	245.561	236.704	216.029	176.722	209.776	180.579	199.34	203.669	202	760.115	973.731	799.702	418.108	476.903	575.635	468.351	679.392	630.097	392.387	2298.61	1494.88	1494.02	2634.63	2411.92	SNX15	sorting nexin-15 [Xiphophorus hellerii]
g13595.t1	431.208	4.22129	2.56825e-08	465.598	463.319	431.067	401.378	287	275.438	143.315	284.819	153.621	197.059	261.456	161.472	145.966	202.601	216.674	147.841	249	16.8167	5.81084	4.20896	41.2837	9.3145	22.1398	7.36112	3.5385	8.16981	12.8651	1935.23	1725.91	1904.24	1424.39	1393.98	Ppargc1a	peroxisome proliferator-activated receptor gamma coactivator 1-alpha isoform X3 [Xiphophorus maculatus]
g13609.t1	936.295	3.00749	3.49649e-08	1131.3	1461.67	1322.71	1187.52	869	874.494	591.035	557.165	434.096	601.67	728.846	775.962	527.231	674.971	664.104	675.105	870	202.641	206.7	283.684	223.986	178.838	226.011	161.945	28.308	40.8491	54.6768	5908.72	1768.37	1957.22	3127.77	2149.98	ADGRL3	adhesion G protein-coupled receptor L3-like [Fundulus heteroclitus]
g13611.t1	94.3267	3.25987	2.40435e-07	8.78487	15.098	8.9433	22.145	12	2.40908	56.6594	99.7908	66.3363	67.6296	51.4836	33.1914	35.0956	90.2897	106.17	67.2004	88	7.56752	9.13132	20.203	8.78378	5.5887	12.9149	4.6007	4.718	6.12736	38.5954	530.448	225.931	411.727	273.09	142.64	Abca1	ATP-binding cassette sub-family A member 1-like isoform X1 [Xiphophorus couchianus]
g13618.t1	3647.03	3.08261	2.20238e-15	286.972	378.393	372.936	375.542	365	399.104	571.037	859.656	889.14	966.637	928.723	1382.38	1040.9	520.818	601.269	697.85	698	2134.04	2370.82	2519.48	1524.86	2193.57	1896.64	1294.64	937.702	1691.15	3104.79	11037.8	8899.63	8891.49	17469.9	12986.8	RBPMS	RNA-binding protein with multiple splicing-like isoform X1 [Seriola dumerili]
g13626.t1	17.1113	3.64233	8.31516e-09	0.976096	0.943623	0.89433	0.922707	1	0.803025	2.22194	4.15795	4.65518	3.49808	4.03793	0.897066	5.58339	20.9208	13.0004	9.30466	5	0.840835	0.83012	0.841791	1.75676	0.93145	2.76748	0.92014	4.718	4.08491	8.57676	4.17676	61.1541	101.418	56.9757	84.2874	-	PREDICTED: uncharacterized protein PB18E9.04c-like [Cyprinodon variegatus]
g13658.t1	464.264	4.34786	6.04314e-21	41.9721	19.8161	34.8789	22.145	17	34.5301	43.3277	48.8559	27.9311	85.12	26.2465	53.824	9.57152	161.861	148.421	190.229	140	31.1109	79.6915	58.0836	129.122	172.318	184.499	57.0487	41.2825	34.7217	57.8931	462.228	1530.55	1430.45	3082.58	2657	CLEC17A	CD209 antigen-like protein C isoform X1 [Xiphophorus couchianus]
g13659.t1	1219.5	3.89447	1.06695e-13	21.4741	10.3799	24.1469	42.4445	4	15.2575	214.417	415.795	301.423	300.835	204.925	297.826	176.275	317.115	336.927	361.848	475	192.551	635.872	636.394	404.932	586.814	508.293	74.5313	38.9235	114.377	219.779	4399.52	4341.94	3696.46	4860.62	5469.61	BTN3A1	E3 ubiquitin-protein ligase TRIM39-like isoform X1 [Fundulus heteroclitus]
g13695.t1	141.301	2.56191	2.2282e-08	14.6414	25.4778	14.3093	15.686	21	16.8635	71.1019	84.1985	88.4484	93.2822	47.4456	90.6037	67.0006	69.369	75.8357	78.5727	70	18.4984	26.5638	20.203	26.3513	28.875	25.8298	28.5243	179.284	185.863	174.751	540.194	372.021	336.042	408.653	374.755	-	PREDICTED: uncharacterized protein LOC103480500 [Poecilia reticulata]
g13706.t1	7.91558	2.30697	3.01001e-05	1.95219	0.943623	2.68299	6.45895	3	1.60605	5.55484	11.4344	4.65518	8.1622	7.06637	8.07359	3.19051	8.80876	5.41684	13.4401	3	0.840835	2.49036	0.841791	0.878378	2.79435	0.922493	5.52084	2.359	1.02123	2.14419	9.74577	27.1796	37.8426	11.7881	19.4509	-	piggyBac transposable element-derived protein 4-like [Epinephelus lanceolatus]
g13717.t1	6626.27	6.86542	1.7894e-17	1.95219	0.943623	7.15464	1.84541	1	1.60605	571.037	1049.88	729.7	859.363	861.088	1088.14	240.086	407.405	421.43	486.944	491	79.8794	45.6566	10.1015	165.135	22.3548	52.5821	69.9306	7.077	16.3396	8.57676	40179	23702.3	19127.2	47030.5	18736.5	CLDN15	PREDICTED: claudin-15 [Cyprinodon variegatus]
g13729.t1	1061.24	3.00938	6.77999e-14	219.622	149.092	147.564	118.107	127	203.968	184.421	286.898	221.121	257.692	273.569	456.607	343.777	201.5	227.507	208.838	188	418.736	529.616	638.078	1002.23	783.35	647.59	733.352	60.1545	710.774	122.219	4122.46	3266.65	2753.43	3477.48	3376.68	Slc7a7	PREDICTED: Y+L amino acid transporter 1 [Poecilia latipinna]
g13739.t1	64.3784	2.23465	0.000348046	20.498	33.0268	17.8866	8.30436	58	37.7422	14.4426	4.15795	10.4742	1.16603	4.03793	2.6912	9.57152	30.8306	17.3339	16.5416	15	30.2701	13.2819	20.203	93.108	38.1895	68.2645	129.74	10.6155	106.208	9.64885	91.8887	157.982	187.699	210.221	199.696	USP47	probable ubiquitin carboxyl-terminal hydrolase creB isoform X3 [Fundulus heteroclitus]
g13757.t1	488.064	2.2413	9.22229e-13	212.789	153.811	126.995	198.382	151	165.423	343.289	261.951	311.897	432.596	324.044	362.415	226.526	241.14	229.674	218.143	224	169.849	182.626	187.719	137.027	186.29	167.894	144.462	680.571	453.425	626.103	1789.04	1231.58	992.989	1210.24	1191.69	DHRS4	PREDICTED: dehydrogenase/reductase SDR family member 4-like isoform X2 [Poecilia reticulata]
g13764.t1	1000.87	2.39461	3.50786e-06	217.669	358.577	346.106	195.614	231	228.862	222.194	438.664	243.233	275.183	358.366	862.081	374.087	333.632	391.096	411.473	532	301.86	671.567	718.89	288.108	260.806	266.6	184.948	1104.01	505.507	1916.91	8677.91	795.004	867.352	2176.86	1095.74	Slc7a8	PREDICTED: large neutral amino acids transporter small subunit 2-like isoform X1 [Poecilia latipinna]
g13806.t1	383.228	2.61458	0.000118292	13.6653	31.1396	13.4149	23.0677	10	20.0756	436.61	396.045	453.88	378.959	278.617	231.443	557.541	295.093	287.092	251.226	179	7.56752	30.7144	27.7791	29.8648	7.4516	33.2097	23.0035	250.054	252.243	472.794	917.494	1212.89	1271.51	931.258	1272.09	actr2a	PREDICTED: actin-related protein 2-like [Cyprinodon variegatus]
g1381.t1	528.645	3.15341	1.07415e-18	32.2112	33.0268	27.7242	39.6764	21	15.2575	193.308	256.753	254.871	223.877	190.792	181.207	439.492	198.197	231.841	258.463	164	229.548	222.472	290.418	194.121	218.891	249.073	221.754	42.462	62.2948	27.8745	1053.94	1430.33	1727.14	2186.69	2334.11	ADAM28	zinc metalloproteinase-disintegrin-like brevilysin H2a isoform X1 [Fundulus heteroclitus]
g1384.t1	16.1835	2.52487	5.53958e-06	0.976096	3.77449	5.36598	17.5314	15	12.0454	1.11097	15.5923	1.1638	3.49808	4.03793	10.7648	8.77389	12.112	5.41684	9.30466	15	1.68167	0.83012	0.841791	1.75676	0.93145	1.84499	11.0417	23.59	10.2123	18.2256	34.8063	56.058	39.3563	51.0817	49.2757	-	uncharacterized protein LOC105924141 [Fundulus heteroclitus]
g13858.t1	10.061	2.89589	0.000349303	0.976096	0.943623	0.89433	3.69083	1	0.803025	48.8826	9.35538	24.4397	3.49808	9.08533	0.897066	3.98813	9.90985	7.58357	5.16926	3	0.840835	0.83012	0.841791	0.878378	0.93145	0.922493	0.92014	1.1795	1.02123	1.07209	1.39225	67.949	31.7878	7.85872	49.2757	Prss8	serine protease 27 [Fundulus heteroclitus]
g13859.t1	384.615	4.05168	7.34824e-05	2.92829	7.54899	4.47165	43.3672	5	12.8484	618.809	257.793	808.838	148.086	85.8059	4.48533	85.346	256.555	270.842	295.682	82	1.68167	0.83012	1.68358	23.7162	3.7258	48.8921	12.882	3.5385	1.02123	26.8024	27.845	1717.41	1615.12	166.998	3825.35	PRSS27	PREDICTED: serine protease 27-like isoform X1 [Poecilia latipinna]
g13864.t1	2.47206	2.32555	2.68938e-05	0.976096	0.943623	0.89433	0.922707	3	3.2121	1.11097	1.03949	1.1638	1.16603	1.00948	0.897066	0.797626	1.10109	2.16674	1.03385	1	0.840835	3.32048	0.841791	1.75676	0.93145	1.84499	0.92014	1.1795	126.632	293.754	1.39225	8.49363	4.54111	11.7881	7.78038	-	uncharacterized protein LOC105929611 [Fundulus heteroclitus]
g13872.t1	625.772	3.87733	5.66033e-69	937.052	1038.93	897.907	1002.98	708	430.422	155.535	259.872	212.975	180.734	207.953	156.09	155.537	188.287	192.839	170.586	182	221.981	219.152	206.239	115.067	121.089	109.777	99.3751	68.411	236.925	66.4699	2457.33	2434.27	2182.76	2041.3	2545.48	DGKD	PREDICTED: diacylglycerol kinase delta-like isoform X1 [Cyprinodon variegatus]
g13875.t1	38.2205	2.48478	0.00129561	19.5219	23.5906	22.3582	32.2948	26	24.8938	32.2181	25.9872	30.2587	45.4751	29.275	43.9562	48.6552	47.3471	31.4177	46.5233	52	1.68167	1.66024	1.68358	6.14864	3.7258	2.76748	3.68056	2.359	16.3396	3.21628	201.877	42.4682	52.9796	163.068	75.2103	RAB38	PREDICTED: ras-related protein Rab-38-like [Cyprinodon variegatus]
g13878.t1	242.678	4.88487	7.12569e-15	0.976096	3.77449	1.78866	4.61354	2	3.2121	45.5497	76.922	115.216	58.3014	32.3034	48.4416	35.0956	50.6503	42.2513	41.3541	39	4.20418	3.32048	2.52537	13.1757	0.93145	11.0699	5.52084	128.565	46.9764	100.777	1234.93	942.793	902.167	899.823	1030.9	-	PREDICTED: E3 ubiquitin-protein ligase TRIM39-like [Poecilia latipinna]
g13880.t1	155.095	4.17886	1.12722e-07	2.92829	3.77449	4.47165	9.22707	5	2.40908	162.201	161.12	288.621	55.9693	123.157	28.7061	20.7383	105.705	73.669	81.6743	47	2.52251	0.83012	0.841791	7.9054	0.93145	16.6049	1.84028	18.872	13.2759	19.2977	76.5739	757.632	927.9	404.724	848.061	-	E3 ubiquitin-protein ligase TRIM21-like [Xiphophorus couchianus]
g13881.t1	93.7579	3.81462	1.02062e-08	12.6893	13.2107	5.36598	7.38166	1	12.8484	112.208	115.383	240.906	40.811	79.749	18.8384	43.8695	67.1668	44.4181	57.8957	20	3.36334	2.49036	1.68358	6.14864	2.79435	9.22493	1.84028	22.4105	10.2123	23.5861	86.3197	363.527	432.919	245.585	606.87	-	E3 ubiquitin-protein ligase TRIM21-like [Xiphophorus couchianus]
g13882.t1	24.6616	2.18525	0.000525958	9.76096	3.77449	4.47165	15.686	4	7.22723	54.4374	15.5923	39.569	15.1584	20.1896	5.3824	19.143	15.4153	22.7507	21.7109	13	1.68167	2.49036	0.841791	7.02702	7.4516	22.1398	4.6007	20.0515	18.3821	8.57676	11.138	33.9745	48.4385	33.3995	190.619	-	PREDICTED: uncharacterized protein LOC103480381 [Poecilia reticulata]
g13889.t1	844.052	2.16101	0.00265996	3.90439	6.60536	28.6186	54.4397	1	12.8484	68.88	141.37	110.561	108.441	86.8154	80.7359	99.7033	81.481	95.3364	70.3019	73	1178.85	1309.1	1114.53	787.905	1354.33	1167.88	945.904	81.3855	87.8255	182.256	1511.99	1870.3	2293.26	2432.27	2741.29	LPCAT4	lysophospholipid acyltransferase LPCAT4 isoform X1 [Xiphophorus couchianus]
g13890.t1	54.3587	2.43493	0.000234486	0.976096	1.88725	2.68299	36.9083	33	101.984	7.77677	6.23692	9.31036	3.49808	9.08533	0.897066	10.3691	6.60657	4.33347	3.10155	8	42.0418	99.6144	31.9881	28.1081	38.1895	32.2872	20.2431	7697.42	3691.73	4950.93	104.419	144.392	204.35	145.386	159.498	-	uncharacterized protein LOC105919169 isoform X1 [Fundulus heteroclitus]
g13914.t1	141.611	3.27118	0.00036122	2.92829	1.88725	1.78866	6.45895	1	0.803025	129.983	135.133	172.242	86.2861	78.7396	74.4565	111.668	160.76	149.505	123.028	100	1.68167	1.66024	0.841791	12.2973	0.93145	19.3723	2.76042	1.1795	2.04245	16.0814	103.027	421.284	582.776	585.474	704.124	LTB4R	PREDICTED: leukotriene B4 receptor 1-like [Cyprinodon variegatus]
g13929.t1	7.92636	3.43566	9.77601e-13	0.976096	1.88725	1.78866	0.922707	6	0.803025	1.11097	3.11846	1.1638	2.33206	1.00948	1.79413	2.39288	3.30328	3.2501	3.10155	3	1.68167	1.66024	1.68358	5.27027	2.79435	5.53496	3.68056	1.1795	2.04245	2.14419	76.5739	5.09618	18.1644	23.5761	12.9673	C1QL2	complement C1q-like protein 2 [Xiphophorus hellerii]
g13940.t1	2345.01	3.48171	0.00133784	6.83267	16.0416	17.8866	83.9664	21	20.8787	2066.4	1869	1884.18	1452.87	1722.18	1467.6	1906.33	1878.47	2111.48	1629.35	1520	3.36334	7.47108	5.05075	158.108	0.93145	452.944	43.2466	4.718	2.04245	108.282	1221.01	9538.35	11614.6	6793.86	12134.8	frrs1	uncharacterized protein LOC105917921 [Fundulus heteroclitus]
g13941.t1	53.7431	2.17378	0.0103984	0.976096	0.943623	0.89433	68.2803	1	1.60605	72.2129	91.4749	82.6295	96.7803	44.4172	5.3824	39.0837	56.1558	104.003	67.2004	65	0.840835	8.3012	3.36717	8.78378	3.7258	15.6824	3.68056	4.718	3.06368	35.3791	4.17676	129.103	219.487	47.1523	294.358	frrs1	PREDICTED: putative ferric-chelate reductase 1 isoform X1 [Cyprinodon variegatus]
g13946.t1	285.537	2.23718	9.95706e-05	106.394	61.3355	58.1314	86.7345	54	41.7573	323.292	299.372	346.811	374.295	258.427	226.958	356.539	339.137	352.095	287.411	311	59.6993	40.6759	45.4567	90.4729	40.0524	218.631	49.6876	28.308	18.3821	39.6675	875.727	603.048	753.824	681.744	833.797	-	PREDICTED: uncharacterized protein LOC103472753 [Poecilia reticulata]
g13950.t1	146.679	2.20413	0.0177358	8.78487	16.9852	22.3582	22.145	13	28.1059	9.99871	21.8292	4.65518	16.3244	1.00948	2.6912	11.1668	16.5164	20.584	21.7109	8	86.606	67.2397	119.534	362.77	123.883	95.9392	559.445	4.718	5.10613	6.43257	420.46	275.194	451.083	253.444	505.725	TRIM21	E3 ubiquitin-protein ligase TRIM39 [Fundulus heteroclitus]
g13970.t1	22.1851	2.84061	7.72065e-05	0.976096	0.943623	0.89433	5.53624	1	0.803025	58.8813	43.6585	59.3536	34.9808	18.1707	13.456	17.5478	24.2241	32.501	20.677	11	1.68167	0.83012	0.841791	5.27027	0.93145	3.68997	1.84028	1.1795	1.02123	2.14419	29.2373	71.3465	107.473	33.3995	101.145	-	uncharacterized protein LOC113125275 isoform X1 [Mastacembelus armatus]
g14005.t1	4237.39	2.57239	6.11913e-10	714.502	801.136	672.536	228.831	615	821.495	1981.97	1912.66	1843.45	1535.66	1438.51	724.829	1247.49	2142.73	2518.83	2393.37	1691	2564.55	2219.74	2195.39	1073.38	1206.23	1928.93	530.921	1285.65	9360.56	1980.16	14091	14911.4	9748.25	14754.7	7811.5	epd2	ependymin [Fundulus heteroclitus]
g14010.t1	85.1735	2.74185	0.00159593	1.95219	2.83087	1.78866	11.0725	2	2.40908	155.535	125.778	196.681	96.7803	88.8344	35.8826	109.275	105.705	110.504	92.0128	45	2.52251	3.32048	1.68358	7.02702	0.93145	18.4499	3.68056	1.1795	6.12736	6.43257	36.1986	307.469	384.481	210.221	351.414	nectin4	PREDICTED: nectin-4 isoform X8 [Poecilia latipinna]
g14015.t1	1065.43	4.30907	8.58378e-14	51.7331	83.0389	106.425	86.7345	86	85.1207	479.938	431.387	700.605	340.48	283.664	229.649	442.683	492.189	475.598	447.658	288	23.5434	20.753	9.2597	85.2026	57.7499	123.614	38.6459	149.796	88.8467	224.068	2540.86	3674.34	4577.44	5308.56	4827.73	-	uncharacterized protein LOC105925516 isoform X1 [Fundulus heteroclitus]
g1404.t1	82.3419	4.6067	1.40701e-39	9.76096	11.3235	9.83763	4.61354	23	11.2424	15.5535	2.07897	2.32759	9.32822	11.1043	4.48533	13.5596	9.90985	8.66694	8.27081	13	14.2942	7.47108	7.57612	8.78378	13.9718	11.0699	8.28126	46.0005	26.5519	24.6582	133.656	422.983	281.549	406.689	424.031	nsmf	NMDA receptor synaptonuclear signaling and neuronal migration factor isoform X1 [Xiphophorus maculatus]
g14044.t1	1053.17	2.18769	1.90474e-16	1325.54	898.329	1161.73	960.538	1072	852.813	682.134	794.168	650.562	788.235	678.372	647.682	551.16	894.089	746.44	680.274	829	722.278	654.965	773.606	547.229	526.269	564.565	534.601	123.847	490.189	214.419	3309.38	2437.67	2605.08	2634.63	2641.44	camk2d1	PREDICTED: calcium/calmodulin-dependent protein kinase type II delta 1 chain isoform X11 [Poecilia reticulata]
g14047.t1	33.2804	2.10023	6.17704e-05	105.418	126.446	99.2706	54.4397	75	67.4541	32.2181	40.54	45.388	24.4866	13.1233	9.86773	15.1549	40.7405	40.0846	47.5572	39	12.6125	5.81084	7.57612	14.9324	7.4516	10.1474	17.4827	9.436	20.4245	12.8651	250.605	28.8783	46.9248	35.3642	51.8692	PAQR9	progestin and adipoQ receptor family member 9 [Fundulus heteroclitus]
g14053.t1	538.938	3.82592	1.38791e-09	1079.56	1175.75	795.059	1014.06	1013	1202.93	191.086	262.99	176.897	226.209	203.915	440.459	106.882	289.588	297.926	289.478	328	33.6334	27.394	23.5702	75.5405	54.9556	65.497	135.261	12.9745	16.3396	23.5861	4787.96	1117.76	715.981	2467.64	805.269	SLC1A1	excitatory amino acid transporter 3 [Fundulus heteroclitus]
g14106.t1	196.289	3.60532	0.000301174	0.976096	0.943623	0.89433	0.922707	1	0.803025	33.329	104.988	33.7501	73.4598	52.493	52.9269	37.4884	203.702	225.341	161.281	222	0.840835	0.83012	1.68358	42.1621	0.93145	1.84499	12.882	3.5385	2.04245	13.9372	1205.69	332.95	538.878	933.222	482.384	MUC3A	mucin-3B-like [Fundulus heteroclitus]
g14114.t1	13.8951	2.55495	0.000264006	7.80877	4.71812	0.89433	1.84541	2	5.62118	19.9974	21.8292	18.6207	30.3167	18.1707	8.97066	16.7502	14.3142	16.2505	13.4401	15	0.840835	0.83012	0.841791	5.27027	0.93145	0.922493	0.92014	2.359	1.02123	1.07209	52.9056	40.7694	37.8426	19.6468	47.979	xnf7.S	E3 ubiquitin-protein ligase TRIM62-like [Fundulus heteroclitus]
g14120.t1	1.945	2.32171	9.62715e-05	0.976096	0.943623	0.89433	0.922707	1	0.803025	1.11097	1.03949	1.1638	1.16603	1.00948	0.897066	0.797626	1.10109	1.08337	1.03385	1	1.68167	0.83012	1.68358	0.878378	0.93145	0.922493	0.92014	1.1795	1.02123	1.07209	5.56901	1.69873	9.08222	5.89404	3.89019	-	-
g14140.t1	2.57251	2.1267	0.00014281	0.976096	0.943623	1.78866	0.922707	1	0.803025	1.11097	1.03949	1.1638	1.16603	1.00948	1.79413	0.797626	1.10109	1.08337	1.03385	1	1.68167	0.83012	1.68358	0.878378	2.79435	1.84499	2.76042	2.359	2.04245	2.14419	1.39225	5.09618	12.1096	1.96468	11.6706	-	PREDICTED: uncharacterized protein LOC107581651 isoform X1 [Sinocyclocheilus grahami]
g14150.t1	6133.25	2.97027	6.49614e-47	489.024	358.577	300.495	238.058	327	541.239	2121.95	2856.51	3035.18	2364.7	2058.33	2753.1	4745.08	2475.26	2579.5	2410.94	1848	2884.07	2241.32	2227.38	1831.42	1844.27	2671.54	2620.56	1525.09	4738.49	2354.32	19488.7	15145.8	21031.4	20385.5	21298.8	Cdh1	B-cadherin [Fundulus heteroclitus]
g14159.t1	179.784	2.06845	1.0148e-08	56.6136	52.8429	59.9201	57.2078	60	56.2118	135.538	147.607	175.733	113.105	83.787	69.0741	99.7033	114.514	107.253	83.742	88	61.381	68.0698	64.8179	61.4864	59.6128	75.6444	66.2501	260.669	207.309	304.475	222.76	446.765	511.632	432.229	632.804	EDARADD	ectodysplasin-A receptor-associated adapter protein [Xiphophorus hellerii]
g14167.t1	126.382	5.23039	2.57281e-11	0.976096	0.943623	0.89433	0.922707	1	0.803025	14.4426	37.4215	29.0949	57.1354	34.3224	53.824	5.58339	27.5274	34.6678	28.9478	42	0.840835	0.83012	0.841791	10.5405	0.93145	2.76748	0.92014	2.359	3.06368	5.36047	254.782	304.072	706.899	691.567	714.498	shtn1	PREDICTED: shootin-1 isoform X1 [Poecilia reticulata]
g1418.t1	201.181	3.2743	4.83236e-11	34.1634	33.9704	33.0902	33.2175	23	28.1059	164.423	120.58	144.311	141.089	111.043	108.545	192.228	142.041	144.088	134.401	111	31.1109	31.5446	21.0448	54.4594	41.9153	44.2796	34.9653	8.2565	20.4245	20.3698	491.465	716.862	803.776	656.203	737.839	RFLNA	PREDICTED: filamin-interacting protein FAM101A [Poecilia mexicana]
g14187.t1	131.367	4.15185	1.15779e-57	315.279	192.499	168.134	277.735	207	224.847	38.8839	47.8164	38.4052	34.9808	43.4077	49.3386	32.7027	41.8416	34.6678	39.2864	36	15.135	19.0928	17.6776	20.2027	22.3548	13.8374	15.6424	31.8465	14.2972	42.8838	644.613	411.092	405.672	644.415	421.437	RIN2	ras and Rab interactor 2-like [Fundulus heteroclitus]
g14188.t1	458.36	3.71957	9.95283e-05	60.518	28.3087	20.5696	58.1306	11	32.121	368.841	148.647	316.552	243.7	177.669	175.825	186.645	382.08	351.011	327.731	182	2.52251	2.49036	0.841791	34.2567	1.8629	34.1322	14.7222	2.359	2.04245	21.4419	303.511	1905.97	1798.28	1697.48	2673.86	-	heme-binding protein 2 [Fundulus heteroclitus]
g14198.t1	675.918	2.45846	1.36379e-43	175.697	135.882	142.198	139.329	136	156.59	296.628	151.765	126.854	277.515	231.171	342.679	328.622	259.858	277.342	251.226	348	512.069	314.615	342.609	367.162	452.685	432.649	388.299	280.721	532.059	194.049	1610.84	1793.85	1752.87	2499.07	1823.2	GALM	PREDICTED: aldose 1-epimerase [Poecilia formosa]
g14220.t1	117.35	2.07486	2.62234e-08	158.128	198.161	152.93	177.16	124	109.211	81.1006	113.304	97.7588	104.943	128.204	126.486	115.656	86.9865	94.253	98.2159	138	24.3842	38.1855	47.1403	50.9459	27.9435	44.2796	32.2049	88.4625	41.8703	51.4605	417.676	304.072	260.357	223.973	259.346	GFRA1	GDNF family receptor alpha-1-like isoform X1 [Xiphophorus couchianus]
g14240.t1	61.197	2.3909	9.32726e-08	5.85658	10.3799	15.2036	17.5314	10	28.9089	17.7755	39.5005	26.7673	26.8186	19.1801	31.3973	14.3573	28.6285	40.0846	28.9478	19	42.0418	24.9036	25.2537	43.9189	91.2821	57.1945	67.1702	9.436	11.2335	10.7209	33.4141	327.854	168.021	135.563	185.432	GJA5	PREDICTED: gap junction alpha-5 protein-like [Cyprinodon variegatus]
g14248.t1	206.056	4.60683	1.1274e-11	0.976096	0.943623	0.89433	0.922707	3	2.40908	54.4374	90.4354	53.5346	67.6296	132.242	89.7066	82.9531	36.3361	35.7511	36.1848	47	6.72668	5.81084	2.52537	11.4189	0.93145	11.0699	1.84028	62.5135	24.5094	30.0187	789.407	969.973	771.989	807.483	831.204	hoxd9b	PREDICTED: homeobox protein Hox-D9b-like [Poecilia reticulata]
g14297.t1	3369.85	7.37513	4.01386e-17	0.976096	0.943623	0.89433	1.84541	2	0.803025	549.929	420.992	573.751	378.959	233.19	108.545	63.8101	189.388	210.173	236.752	139	14.2942	5.81084	0.841791	72.027	8.38305	82.1018	7.36112	2.359	1.02123	260.519	1006.6	16008.8	12754.5	15540.6	31405.5	MAL	myelin and lymphocyte protein-like [Fundulus heteroclitus]
g14298.t1	32.9416	2.61605	0.000948863	1.95219	0.943623	7.15464	0.922707	1	0.803025	26.6632	46.7769	45.388	33.8148	12.1138	37.6768	70.9888	46.246	23.8341	20.677	15	0.840835	0.83012	0.841791	5.27027	0.93145	4.61246	2.76042	1.1795	5.10613	13.9372	27.845	103.622	80.2263	145.386	125.783	MAL	PREDICTED: myelin and lymphocyte protein-like [Cyprinodon variegatus]
g14332.t1	7137.25	6.1432	5.27655e-57	201.076	265.158	203.013	190.078	154	151.772	691.022	611.218	411.984	569.022	866.135	1963.68	330.217	233.432	301.176	375.288	411	402.76	356.952	335.033	328.513	326.008	369.92	331.25	251.233	189.948	333.421	48397.5	20236.9	18388.5	42081.5	27764.3	SLC3A1	neutral and basic amino acid transport protein rBAT [Xiphophorus couchianus]
g14336.t1	244.145	3.61817	5.108e-06	1.95219	4.71812	0.89433	1.84541	2	1.60605	164.423	214.134	116.38	195.893	132.242	261.943	21.5359	197.096	185.256	160.247	173	10.09	5.81084	12.6269	35.1351	2.79435	9.22493	21.1632	7.077	8.16981	10.7209	2146.85	399.201	470.762	996.092	329.369	Abcg8	ATP-binding cassette sub-family G member 8 [Fundulus heteroclitus]
g14337.t1	42.6727	3.09913	0.000188606	0.976096	0.943623	0.89433	0.922707	1	0.803025	25.5523	51.9744	27.9311	34.9808	30.2844	26.912	7.97626	50.6503	57.4185	55.828	33	0.840835	1.66024	0.841791	4.39189	2.79435	4.61246	3.68056	4.718	1.02123	1.07209	343.886	66.2503	83.2537	133.598	63.5398	ABCG5	ATP-binding cassette sub-family G member 5 [Fundulus heteroclitus]
g14339.t1	253.26	2.09477	1.41029e-13	150.319	167.021	151.142	184.541	143	178.272	131.094	87.3169	111.724	118.935	94.8913	112.133	71.7864	182.782	164.672	170.586	179	124.444	166.854	141.421	223.108	246.834	240.771	241.077	55.4365	100.08	88.9839	331.356	686.285	564.611	766.225	846.765	lyrm7	complex III assembly factor LYRM7 [Fundulus heteroclitus]
g14344.t1	185.693	2.17985	3.14597e-07	14.6414	13.2107	22.3582	22.145	15	28.9089	49.9935	73.8036	58.1898	45.4751	76.7206	75.3536	120.442	51.7514	93.1696	64.0988	59	116.035	58.9385	101.015	335.54	217.959	226.933	185.868	36.5645	27.5731	60.0373	430.206	419.585	597.913	457.77	495.351	TMEM26	transmembrane protein 26 [Fundulus heteroclitus]
g14371.t1	13.0155	3.04856	8.37276e-11	40.996	74.5462	70.6521	49.8262	30	59.4239	5.55484	9.35538	11.638	11.6603	13.1233	2.6912	8.77389	8.80876	13.0004	7.23696	12	2.52251	1.66024	1.68358	5.27027	2.79435	1.84499	2.76042	2.359	3.06368	1.07209	30.6296	52.6605	31.7878	27.5055	67.43	GRID1	glutamate receptor ionotropic, delta-1-like [Fundulus heteroclitus]
g14379.t1	735.932	4.17743	2.94623e-11	41.9721	70.7718	80.4897	62.7441	70	65.045	183.31	234.924	207.156	274.017	263.475	473.651	67.0006	322.621	291.426	293.614	312	73.1527	94.6337	95.9642	126.486	39.1209	86.7143	82.8126	4.718	3.06368	11.793	3830.09	2244.02	2161.57	3514.81	2452.12	-	uncharacterized protein LOC105927267 [Fundulus heteroclitus]
g14393.t1	1008.82	3.01961	2.25606e-10	634.463	1826.85	1844.11	486.267	884	700.238	406.614	882.525	794.872	480.404	502.722	574.122	457.838	693.69	670.605	524.163	629	119.399	860.004	923.445	235.405	148.101	220.476	122.379	62.5135	103.144	69.6862	3569.74	3198.7	3218.13	2950.95	3263.87	SLC16A9	monocarboxylate transporter 9 [Xiphophorus maculatus]
g1442.t1	169.408	4.48125	4.73782e-08	22.4502	10.3799	20.5696	17.5314	18	19.2726	73.3239	42.619	91.9398	59.4674	46.4361	107.648	23.9288	77.0766	80.1692	67.2004	76	0.840835	4.98072	0.841791	18.4459	0.93145	0.922493	11.9618	3.5385	1.02123	6.43257	838.136	645.516	697.817	485.276	713.201	MVB12B	multivesicular body subunit 12B-like isoform X1 [Xiphophorus maculatus]
g14432.t1	1751.98	2.50889	1.9023e-33	1346.04	1049.31	954.25	1042.66	1050	1178.04	571.037	584.192	695.95	960.807	586.509	672.8	852.663	842.337	771.358	705.087	604	917.351	962.109	940.281	1062.84	1481.01	1603.29	888.855	523.698	752.644	919.857	2446.19	5614.29	4600.14	6495.23	5808.05	BNIP3	BCL2/adenovirus E1B 19 kDa protein-interacting protein 3 [Xiphophorus maculatus]
g14445.t1	645.623	3.85363	3.2904e-18	62.4702	35.8577	38.4562	52.5943	11	36.1361	247.746	195.424	253.707	281.013	264.484	273.605	244.074	299.498	331.511	332.9	249	63.9035	64.7493	67.3433	101.013	135.992	149.444	95.6946	31.8465	22.467	56.821	1658.17	2026.58	2356.84	3161.17	2787.97	GSTO1	PREDICTED: glutathione S-transferase omega-1-like [Poecilia latipinna]
g14456.t1	171.384	2.84157	0.000260379	10.7371	11.3235	8.04897	11.0725	5	11.2424	133.316	168.397	128.017	145.753	141.327	124.692	144.37	159.659	172.255	201.601	177	8.40835	14.112	15.994	46.554	25.1492	58.117	8.28126	1.1795	3.06368	2.14419	267.312	436.573	585.803	842.847	516.099	DKK1	dickkopf-related protein 1 isoform X1 [Fundulus heteroclitus]
g14459.t1	7.93209	2.19774	6.91381e-10	8.78487	2.83087	5.36598	9.22707	14	8.03025	3.3329	2.07897	5.81898	2.33206	4.03793	4.48533	1.59525	2.20219	8.66694	3.10155	5	7.56752	3.32048	5.05075	4.39189	5.5887	2.76748	2.76042	8.2565	2.04245	4.28838	12.5303	30.5771	22.7055	13.7528	23.3411	PROKR1	PREDICTED: prokineticin receptor 2-like [Stegastes partitus]
g14468.t1	4933.84	2.06732	8.86989e-19	2397.29	3033.75	2919.99	2234.8	2880	3018.57	5248.21	4900.14	5808.5	4981.27	4105.56	3522.78	2380.12	4365.84	4177.47	4722.63	4397	1743.05	1715.86	1829.21	2793.24	2450.65	2731.5	2350.04	2456.9	3073.89	2980.42	12398	10297.7	10232.6	15086.8	13479.5	VDAC2	voltage-dependent anion-selective channel protein 2 [Echeneis naucrates]
g14480.t1	1948.25	2.30828	3.45579e-37	1427.05	1638.13	1513.21	1299.17	1566	1320.17	945.434	933.459	951.985	1045.93	810.614	998.435	1357.56	819.214	981.531	927.365	815	1442.87	1326.53	1399.06	1127.84	1448.41	1190.94	1086.69	483.595	1319.42	1016.35	6273.49	4875.34	4123.33	6039.42	4835.51	EIF4EBP2	eukaryotic translation initiation factor 4E-binding protein 2 [Seriola dumerili]
g14488.t1	2189.23	2.81419	0.00081705	1368.49	1997.65	1683.13	1454.19	1747	2159.33	904.328	2126.79	2722.12	1730.39	1623.25	7612.5	3371.57	512.009	448.514	533.467	710	102.582	94.6337	98.4896	114.189	63.3386	66.4195	136.181	101.437	394.193	1063.52	9770.83	8325.46	4482.07	7208.41	3817.57	-	PREDICTED: acyl-CoA desaturase isoform X1 [Poecilia reticulata]
g14516.t1	156.528	3.31209	2.86639e-09	21.4741	11.3235	4.47165	20.2996	7	8.03025	111.097	77.9615	95.4312	83.954	84.7964	94.1919	121.239	96.8963	132.171	94.0805	92	7.56752	11.6217	4.20896	27.2297	18.629	23.0623	11.9618	24.7695	21.4458	33.2349	210.23	579.266	663.002	561.898	657.442	TRIM16	tripartite motif-containing protein 16 [Fundulus heteroclitus]
g14521.t1	11.5212	2.25517	0.000281516	0.976096	0.943623	0.89433	2.76812	1	0.803025	6.66581	12.4738	9.31036	10.4943	13.1233	5.3824	6.38101	16.5164	15.1671	11.3724	18	0.840835	2.49036	0.841791	1.75676	1.8629	1.84499	8.28126	1.1795	1.02123	4.28838	11.138	23.7822	30.2741	41.2583	45.3855	tmem150a	transmembrane protein 150A [Fundulus heteroclitus]
g14541.t1	924.746	2.2117	1.46684e-10	74.1833	102.855	107.32	135.638	105	85.9237	229.97	401.242	300.259	269.352	317.987	413.547	346.17	177.276	236.174	222.278	221	952.667	914.792	880.514	766.824	902.575	810.871	721.39	498.928	470.785	373.089	3495.95	1827.83	1954.19	2831.1	1926.94	TTC31	PREDICTED: stress-induced-phosphoprotein 1-like isoform X3 [Poecilia latipinna]
g14542.t1	1163.5	3.75585	7.14835e-33	194.243	131.164	133.255	282.348	109	144.545	301.072	380.452	300.259	243.7	438.115	488.901	294.324	508.706	475.598	530.366	552	187.506	116.217	133.003	334.662	285.024	208.483	361.615	314.926	150.12	246.582	5740.26	3660.76	3722.2	5041.37	3105.67	PYROXD2	pyridine nucleotide-disulfide oxidoreductase domain-containing protein 2 [Xiphophorus hellerii]
g14545.t1	47.4105	2.17062	0.00346313	1.95219	0.943623	0.89433	0.922707	1	0.803025	51.1045	31.1846	47.7156	40.811	52.493	126.486	76.5721	31.9317	56.3351	38.2525	32	2.52251	9.13132	4.20896	5.27027	3.7258	1.84499	12.882	16.513	5.10613	6.43257	64.0436	110.417	116.555	223.973	97.2547	nkx-2.5	homeobox protein Nkx-2.3 [Fundulus heteroclitus]
g14550.t1	1173.69	4.71179	2.85596e-07	83.9443	38.6886	42.9278	83.0436	39	49.7876	323.292	369.018	278.147	373.129	329.091	451.224	127.62	420.618	523.267	554.144	566	8.40835	9.13132	1.68358	68.5135	4.65725	22.1398	41.4063	3.5385	1.02123	18.2256	4902.12	3866.3	4082.46	6253.57	4801.79	ST3GAL5	lactosylceramide alpha-2,3-sialyltransferase isoform X1 [Fundulus heteroclitus]
g14557.t1	1401.84	2.22619	6.33153e-09	1097.13	592.595	576.843	767.692	499	566.133	907.661	1275.45	1055.56	839.54	882.287	900.654	663.625	1477.67	1823.31	1433.95	1568	680.236	483.13	505.917	571.824	467.588	500.914	489.514	194.617	875.191	328.061	5673.43	3857.81	3311.98	3308.52	2204.44	ABCC2	canalicular multispecific organic anion transporter 1 [Fundulus heteroclitus]
g14562.t1	3532.62	2.43969	1.07383e-05	66.3745	43.4067	146.67	138.406	97	190.317	536.597	630.969	594.699	548.033	545.12	441.357	773.698	517.514	654.354	640.988	564	1671.58	1263.44	1351.92	1800.67	2053.85	1800.71	1909.29	7102.95	3194.4	6817.45	7557.15	7360.58	8025.65	15027.8	11243.9	prom1a	PREDICTED: prominin-1-A-like [Cyprinodon variegatus]
g14590.t1	911.989	5.48477	2.34779e-24	8.78487	6.60536	15.2036	29.5266	2	8.83328	105.542	230.766	87.2846	116.603	91.8628	65.4858	24.7264	193.793	222.09	201.601	184	73.9935	53.1277	54.7164	71.1486	77.3104	98.7067	99.3751	2.359	5.10613	22.514	2595.16	4258.71	3732.79	3917.57	5107.82	PAOX	peroxisomal N(1)-acetyl-spermine/spermidine oxidase-like [Fundulus heteroclitus]
g14591.t1	736.899	2.21998	5.22826e-20	320.16	263.271	304.967	297.112	235	277.847	206.64	332.636	219.957	289.175	343.224	418.93	196.216	340.238	356.428	333.934	305	715.551	681.528	687.743	427.77	572.842	531.356	566.806	318.465	273.689	239.077	1834.99	2142.09	1831.58	1785.89	2059.21	PAOX	PREDICTED: peroxisomal N(1)-acetyl-spermine/spermidine oxidase [Cyprinodon variegatus]
g14596.t1	255.101	4.1278	3.84884e-06	21.4741	2.83087	6.26031	5.53624	2	2.40908	56.6594	107.067	68.6639	101.444	139.308	205.428	33.5003	116.716	179.839	139.57	122	2.52251	0.83012	1.68358	30.7432	1.8629	4.61246	10.1215	3.5385	4.08491	4.28838	721.187	1044.72	1372.93	966.622	810.456	-	PREDICTED: uncharacterized protein LOC107086573 [Cyprinodon variegatus]
g14597.t1	122.046	2.49856	2.86304e-06	148.367	144.374	110.897	83.0436	89	91.5449	125.539	118.502	161.768	166.742	119.119	175.825	110.87	104.604	100.753	107.521	120	15.9759	29.0542	15.994	26.3513	19.5605	36.8997	24.8438	49.539	25.5307	15.0093	275.666	426.38	322.419	294.702	413.657	msxc	PREDICTED: homeobox protein MSX-2-like [Poecilia mexicana]
g14616.t1	586.397	2.13479	6.8208e-18	542.71	565.23	533.915	653.277	621	711.48	631.03	422.032	487.63	574.852	543.101	760.712	293.527	282.981	303.343	298.783	329	415.373	373.554	403.218	276.689	285.955	270.29	278.802	215.848	205.267	290.538	2522.76	983.562	941.523	1396.89	1593.68	tmem14c	transmembrane protein 14A [Fundulus heteroclitus]
g14617.t1	2942.29	3.32318	2.22005e-12	396.295	260.44	304.072	298.957	227	319.604	1753.11	1754.65	2041.3	1686.08	1395.1	1479.26	1172.51	1782.67	2081.15	1721.36	1520	284.202	241.565	164.149	420.743	388.415	183.576	366.216	1606.48	937.486	1761.45	11987.3	5641.47	10585.3	13385.4	8430.04	GSTA2	PREDICTED: glutathione S-transferase A4-like [Cyprinodon variegatus]
g14627.t1	161.512	2.64654	2.48769e-10	3.90439	4.71812	3.57732	18.4541	1	4.01513	81.1006	71.7246	111.724	44.3091	94.8913	36.7797	96.5128	188.287	148.421	129.231	94	36.9968	52.2975	65.6597	79.9324	71.7217	81.1794	57.9688	16.513	12.2547	25.7303	217.191	434.874	619.105	473.488	636.694	FAM83B	protein FAM83B [Xiphophorus couchianus]
g1463.t1	544.529	3.74839	1.44998e-05	21.4741	15.098	15.2036	23.0677	16	21.6817	302.183	298.333	401.509	298.503	276.598	263.737	352.551	386.484	390.012	417.676	277	5.04501	4.1506	5.05075	36.8919	3.7258	43.3572	21.1632	9.436	6.12736	16.0814	516.526	2014.69	2658.06	2041.3	2758.14	VGLL4	transcription cofactor vestigial-like protein 4 [Fundulus heteroclitus]
g14664.t1	20.3815	6.1062	5.50501e-30	0.976096	0.943623	0.89433	0.922707	1	0.803025	1.11097	1.03949	1.1638	2.33206	1.00948	2.6912	3.19051	1.10109	1.08337	1.03385	3	0.840835	0.83012	0.841791	0.878378	0.93145	0.922493	0.92014	1.1795	1.02123	1.07209	263.136	22.0834	25.733	90.3752	42.7921	-	-
g1467.t1	2166.41	5.08519	9.56109e-08	0.976096	3.77449	0.89433	0.922707	2	1.60605	438.832	700.614	431.768	988.792	651.116	767.889	56.6315	746.542	786.525	638.92	795	11.7717	7.47108	1.68358	118.581	4.65725	21.2173	37.7257	8.2565	7.14859	12.8651	8815.74	8155.58	7633.6	12084.7	8725.7	UGT2A3	PREDICTED: UDP-glucuronosyltransferase 2A1-like [Poecilia reticulata]
g14676.t1	381.347	2.65222	3.1693e-13	138.606	107.573	106.425	129.179	99	68.2571	391.061	487.519	423.621	278.681	352.309	301.414	342.182	267.566	276.259	273.971	254	65.5852	117.047	114.484	116.824	188.153	107.932	131.58	108.514	53.1038	84.6955	1679.06	1178.92	776.53	1029.49	953.096	FBLN7	PREDICTED: fibulin-7 isoform X2 [Poecilia latipinna]
g1468.t1	2.9328	3.16883	1.74193e-08	0.976096	0.943623	0.89433	0.922707	1	0.803025	1.11097	1.03949	1.1638	1.16603	2.01896	0.897066	1.59525	1.10109	1.08337	2.0677	1	0.840835	0.83012	0.841791	0.878378	0.93145	0.922493	0.92014	1.1795	1.02123	1.07209	20.8838	1.69873	6.05481	1.96468	16.8575	UGT2A3	UDP-glucuronosyltransferase 2C1-like isoform X2 [Xiphophorus maculatus]
g1469.t1	244.649	3.58731	0.000154737	0.976096	0.943623	0.89433	0.922707	1	0.803025	148.87	253.635	292.113	326.488	142.337	70.8682	7.97626	258.757	249.175	240.887	189	5.88585	2.49036	4.20896	17.5676	2.79435	4.61246	20.2431	1.1795	1.02123	2.14419	1020.52	750.837	776.53	1021.63	791.005	Ugt2a2	UDP-glucuronosyltransferase 2A2-like isoform X2 [Xiphophorus maculatus]
g1470.t1	88.8907	2.54185	3.05893e-11	5.85658	7.54899	14.3093	10.1498	17	9.6363	52.2155	68.6061	50.0432	57.1354	50.4741	49.3386	27.1193	52.8525	85.5861	52.7264	77	23.5434	16.6024	21.0448	24.5946	28.875	24.9073	23.0035	60.1545	40.8491	125.435	233.898	300.675	336.042	178.786	225.631	Ugt2a2	UDP-glucuronosyltransferase 2C1-like isoform X2 [Xiphophorus maculatus]
g14700.t1	1858.61	3.0043	1.55188e-10	2703.79	2932.78	2727.71	2458.09	2361	2621.07	1375.38	1429.29	1245.26	1339.77	1403.18	1031.63	1048.88	1540.43	1280.54	1197.2	1251	588.585	599.346	556.424	485.743	424.741	556.263	449.028	126.206	59.2311	88.9839	5063.62	6145.99	5826.24	5772.23	6973.81	CAPN11	calpain-1 catalytic subunit-like [Xiphophorus maculatus]
g14706.t1	341.392	2.48086	1.3407e-23	116.155	126.446	97.482	107.034	109	120.454	137.76	128.896	172.242	173.738	141.327	198.252	162.716	199.298	176.589	229.515	167	127.807	121.197	109.433	294.257	311.104	227.856	266.841	81.3855	84.7618	129.723	776.877	851.062	947.578	964.657	1273.39	Glyat	PREDICTED: glycine N-acyltransferase-like [Poecilia mexicana]
g14707.t1	180.555	5.79425	1.60918e-16	3.90439	9.43623	2.68299	8.30436	6	6.4242	29.9961	25.9872	6.98277	38.4789	15.1422	17.0443	5.58339	13.2131	41.168	73.4035	36	0.840835	2.49036	0.841791	9.66215	1.8629	10.1474	2.76042	3.5385	1.02123	6.43257	388.438	407.694	868.865	901.788	1357.68	GLYATL3	PREDICTED: glycine N-acyltransferase-like protein 3 [Cyprinodon variegatus]
g14716.t1	573.991	2.0332	0.000175858	131.773	166.078	130.572	83.0436	103	135.711	632.141	675.667	749.484	569.022	573.385	715.859	593.434	634.23	633.77	601.702	642	154.714	138.63	140.579	282.838	473.177	264.755	149.983	66.052	44.934	94.3443	542.978	1537.35	1783.14	1176.84	2061.8	ism1	PREDICTED: isthmin-1 [Poecilia reticulata]
g14717.t1	1758.52	3.7213	1.48249e-13	81.9921	75.4899	68.8634	77.5074	70	167.832	237.747	429.308	276.983	345.144	392.688	458.401	220.943	172.872	157.088	161.281	175	265.704	290.542	225.6	352.229	312.036	202.948	679.063	1979.2	1246.92	1469.84	10372.3	4398	3685.87	6923.53	6522.55	SPTLC3	PREDICTED: serine palmitoyltransferase 3 [Poecilia formosa]
g14724.t1	49.4804	2.14218	0.00460508	38.0678	54.7302	86.75	24.9131	90	73.8783	79.9897	119.541	217.63	86.2861	110.033	76.2506	81.3579	35.235	35.7511	63.0649	43	3.36334	1.66024	9.2597	8.78378	3.7258	6.45745	7.36112	4.718	5.10613	5.36047	65.4359	112.116	90.8222	147.351	216.554	SRD5A2	PREDICTED: 3-oxo-5-alpha-steroid 4-dehydrogenase 2 [Cyprinodon variegatus]
g14747.t1	494.114	2.99336	1.37774e-30	183.506	145.318	116.263	150.401	134	133.302	117.763	102.909	112.888	137.591	124.166	81.633	163.513	149.749	115.92	151.976	117	236.275	224.962	239.911	248.581	322.282	259.22	246.598	277.182	252.243	331.277	1731.96	1258.76	1058.08	2310.46	1522.36	NTPCR	PREDICTED: cancer-related nucleoside-triphosphatase [Poecilia mexicana]
g14791.t1	216.362	2.02022	8.68899e-08	67.3506	40.5758	52.7655	19.3769	59	93.9539	172.2	194.384	231.595	200.557	117.1	58.3093	163.513	170.67	232.924	231.583	134	73.1527	81.3517	116.167	149.324	93.145	115.312	193.229	12.9745	261.434	54.6768	484.504	519.81	622.132	483.311	549.813	haao	PREDICTED: 3-hydroxyanthranilate 3,4-dioxygenase [Cyprinodon variegatus]
g14792.t1	49.8392	2.34317	4.53544e-07	6.83267	6.60536	2.68299	3.69083	4	3.2121	39.9948	36.382	17.4569	39.6449	41.3887	37.6768	22.3335	38.5383	56.3351	39.2864	28	14.2942	6.64096	8.41791	32.5	30.7379	28.5973	55.2084	3.5385	14.2972	3.21628	68.2204	125.706	199.809	143.422	140.047	TMEM229B	transmembrane protein 229b-like [Fundulus heteroclitus]
g14797.t1	16386.7	3.96451	1.75887e-12	41.9721	79.2644	295.129	684.649	174	98.7721	7827.88	9175.55	10673.2	6589.22	5907.49	7020.44	7487.32	5089.26	5745.1	5042.09	3982	4269.76	4495.1	4402.57	3002.29	3323.41	3563.59	3149.64	51.898	60.2524	635.752	64755.1	49410.9	62976.1	70944.6	60387.4	TACSTD2	epithelial cell adhesion molecule [Fundulus heteroclitus]
g1480.t1	1802.81	3.86594	2.23083e-14	42.9482	55.6738	53.6598	52.5943	37	46.5755	512.156	680.864	555.13	584.18	683.419	1002.02	674.792	480.077	557.934	525.197	522	598.675	594.366	500.024	409.324	544.898	456.634	371.737	10.6155	164.417	15.0093	12510.8	4545.79	4061.27	6587.57	5658.93	acsbg2	long-chain-fatty-acid--CoA ligase ACSBG2 isoform X2 [Fundulus heteroclitus]
g14808.t1	560.235	3.10474	2.22046e-13	64.4224	62.2791	43.8222	51.6716	36	72.2723	416.613	279.622	351.466	438.427	394.707	583.99	204.192	387.585	331.511	357.713	328	74.8344	68.8999	79.1284	124.73	121.089	128.226	111.337	126.206	49.0189	135.084	2533.9	1325.01	1501.59	2135.61	1636.47	TMEM254	PREDICTED: transmembrane protein 254 isoform X1 [Cyprinodon variegatus]
g1485.t1	576.799	3.60121	7.59631e-78	12.6893	23.5906	35.7732	19.3769	9	16.0605	163.312	189.187	188.535	129.429	114.071	97.7802	153.942	165.164	170.089	189.195	158	206.846	222.472	116.167	193.243	282.229	219.553	219.913	188.72	89.8679	206.914	1507.81	1895.78	2054.09	2447.99	2418.4	prlr	prolactin receptor-like [Xiphophorus hellerii]
g14852.t1	138.87	4.73526	2.43838e-12	1.95219	2.83087	1.78866	1.84541	1	1.60605	18.8865	37.4215	8.14657	22.1545	36.3413	95.9861	7.17864	50.6503	45.5014	39.2864	47	2.52251	8.3012	5.05075	14.9324	3.7258	6.45745	2.76042	3.5385	3.06368	2.14419	871.55	536.797	445.029	585.474	392.909	Hgsnat	heparan-alpha-glucosaminide N-acetyltransferase-like [Fundulus heteroclitus]
g14867.t1	777.478	2.69688	5.62447e-35	265.498	144.374	141.304	162.396	125	105.999	372.174	272.346	315.389	437.26	374.518	496.078	354.944	546.143	529.767	513.824	427	193.392	184.287	178.46	307.432	366.991	312.725	311.927	375.081	222.627	378.449	2494.92	2413.89	1995.06	2530.51	2161.65	ABHD12	lysophosphatidylserine lipase ABHD12-like [Xiphophorus hellerii]
g14868.t1	542.549	2.14093	2.31657e-73	581.753	721.872	685.057	629.286	613	691.405	344.4	453.216	329.354	353.306	353.318	505.048	282.36	327.025	331.511	311.189	279	369.968	311.295	334.191	305.675	325.076	297.043	297.205	248.874	314.538	251.942	1421.49	1285.94	1153.44	1538.34	1527.55	mocos	PREDICTED: molybdenum cofactor sulfurase [Poecilia latipinna]
g14871.t1	37.8848	3.86139	6.22277e-13	68.3267	64.1664	30.4072	64.5895	13	48.1815	17.7755	12.4738	29.0949	31.4828	9.08533	20.6325	18.3454	19.8197	15.1671	31.0155	16	0.840835	1.66024	4.20896	8.78378	7.4516	5.53496	6.44098	1.1795	1.02123	5.36047	76.5739	151.187	131.692	186.644	159.498	SPATA48	uncharacterized protein C7orf72 homolog [Fundulus heteroclitus]
g14875.t1	4849.63	3.29435	5.14849e-46	2184.5	2312.82	2431.68	2174.82	2385	2773.65	4097.25	4288.92	5923.72	4337.62	2700.36	1796.82	1313.69	1915.9	2028.06	2021.18	1752	2111.34	1910.11	1942.01	1107.63	927.725	1354.22	1183.3	950.677	1238.75	1653.17	26509.9	12134	9371.34	17941.4	16009.4	COX5B	cytochrome c oxidase subunit 5B, mitochondrial-like [Xiphophorus couchianus]
g14877.t1	60.1419	3.26077	0.000184291	0.976096	0.943623	0.89433	0.922707	2	2.40908	57.7703	42.619	80.3019	48.9732	63.5973	51.1328	43.8695	56.1558	52.0017	43.4218	15	0.840835	0.83012	0.841791	4.39189	0.93145	7.37994	1.84028	1.1795	2.04245	2.14419	43.1598	207.245	237.651	176.821	351.414	-	-
g14878.t1	171.59	3.33723	0.000163211	1.95219	0.943623	7.15464	13.8406	7	6.4242	171.089	136.173	214.138	146.92	99.9387	100.471	82.9531	176.175	150.588	160.247	77	1.68167	0.83012	0.841791	19.3243	3.7258	24.9073	4.6007	4.718	4.08491	6.43257	107.203	672.696	688.735	453.841	1021.82	ADTRP	PREDICTED: androgen-dependent TFPI-regulating protein-like [Cyprinodon variegatus]
g14879.t1	1580.72	2.20142	1.89753e-08	116.155	102.855	112.686	121.797	98	116.439	583.258	703.733	907.76	502.558	603.67	547.21	760.936	1193.59	1192.79	1163.08	979	645.762	593.536	611.982	1600.4	1939.28	1540.56	1596.44	255.951	340.068	543.552	1809.93	2972.77	5002.79	5919.58	4869.22	fam83h	PREDICTED: protein FAM83H-like [Poecilia mexicana]
g14883.t1	217.097	2.2487	0.0117702	878.487	568.061	750.343	437.363	780	744.404	264.41	348.228	285.13	255.36	310.92	346.268	312.67	207.006	221.007	248.124	219	5.88585	3.32048	5.05075	30.7432	2.79435	69.1869	14.7222	3.5385	10.2123	9.64885	680.811	389.008	460.166	703.355	623.727	SMOC2	PREDICTED: SPARC-related modular calcium-binding protein 2 isoform X3 [Poecilia mexicana]
g14953.t1	141.848	5.31692	9.98711e-59	5.85658	9.43623	3.57732	13.8406	7	4.81815	32.2181	43.6585	25.6035	19.8225	29.275	34.9856	16.7502	15.4153	23.8341	21.7109	19	16.8167	11.6217	8.41791	11.4189	8.38305	6.45745	9.2014	7.077	5.10613	20.3698	1060.9	462.054	466.221	632.627	383.832	Acss1	acetyl-coenzyme A synthetase 2-like, mitochondrial [Fundulus heteroclitus]
g14955.t1	99.3295	2.21344	0.000819443	76.1355	67.9409	78.701	74.7393	88	88.3328	54.4374	49.8954	66.3363	76.9578	100.948	135.457	113.263	68.2679	53.085	49.6249	69	9.24919	9.96144	9.2597	6.14864	7.4516	9.22493	5.52084	116.77	108.25	123.291	157.325	227.629	260.357	284.878	366.975	DLK2	protein delta homolog 2 [Fundulus heteroclitus]
g14978.t1	854.298	2.05085	0.000557824	86.8726	123.615	143.093	125.488	149	199.15	66.6581	119.541	72.1553	104.943	103.977	96.8831	166.704	178.377	177.672	176.789	131	414.532	298.013	369.546	1848.11	1094.45	653.125	2397.88	299.593	407.469	397.747	2006.24	1590.01	2111.62	2503	2378.2	Helz2	helicase with zinc finger domain 2 [Fundulus heteroclitus]
g1498.t1	525.064	2.48145	0.0049813	213.765	184.007	215.534	267.585	219	167.029	988.761	703.733	1238.28	473.407	549.158	230.546	344.575	701.397	686.855	842.589	593	45.4051	27.394	16.8358	137.027	18.629	83.9468	138.021	2.359	2.04245	3.21628	1046.97	1702.12	1468.29	1243.64	1958.06	-	PREDICTED: papilin-like isoform X1 [Cyprinodon variegatus]
g14980.t1	701.951	2.69788	0.0122994	1.95219	0.943623	2.68299	1.84541	3	10.4393	443.276	527.02	363.104	539.871	758.121	1975.34	100.501	632.028	764.858	533.467	706	8.40835	5.81084	5.05075	108.04	4.65725	3.68997	38.6459	16.513	3.06368	22.514	6613.2	687.984	681.166	2078.63	289.171	Slc23a1	PREDICTED: solute carrier family 23 member 1 [Cyprinodon variegatus]
g14986.t1	1073.02	5.19947	7.90971e-13	3.90439	7.54899	8.9433	1.84541	24	16.8635	243.302	396.045	240.906	426.766	283.664	178.516	96.5128	325.924	459.348	247.091	320	23.5434	27.394	16.8358	90.4729	13.0403	18.4499	24.8438	11.795	25.5307	11.793	11128.3	2138.7	4998.25	2909.69	1312.29	TMPRSS15	PREDICTED: enteropeptidase [Cyprinodon variegatus]
g1499.t1	558.089	5.77414	4.21623e-14	0.976096	0.943623	1.78866	1.84541	1	0.803025	72.2129	85.2379	50.0432	40.811	77.7301	92.3978	35.8932	111.211	138.671	119.927	104	4.20418	0.83012	0.841791	41.2837	2.79435	10.1474	8.28126	9.436	6.12736	28.9466	1292.01	2617.74	3001.67	3117.95	2148.68	-	PREDICTED: amyloid beta A4 precursor protein-binding family B member 1-interacting protein-like [Poecilia reticulata]
g14990.t1	848.521	4.12093	1.23355e-11	145.438	105.686	152.036	234.368	130	165.423	458.83	357.584	380.561	359.137	362.404	216.193	406.789	437.135	440.931	413.541	302	26.0659	19.0928	26.0955	86.9594	18.629	72.8769	30.3646	102.616	37.7854	97.5606	1858.66	3343.09	3891.73	3288.87	3953.73	Arap1	PREDICTED: arf-GAP with Rho-GAP domain, ANK repeat and PH domain-containing protein 1-like [Cyprinodon variegatus]
g15009.t1	25.3116	2.60222	0.000826448	0.976096	0.943623	0.89433	0.922707	2	0.803025	6.66581	48.8559	10.4742	13.9923	28.2655	51.1328	19.9407	24.2241	26.0008	16.5416	27	1.68167	1.66024	0.841791	5.27027	1.8629	3.68997	2.76042	1.1795	2.04245	2.14419	183.777	50.9618	51.4659	51.0817	28.5281	CDX1	homeobox protein CDX-1-like [Fundulus heteroclitus]
g1503.t1	601.869	3.83282	2.27171e-05	2.92829	0.943623	1.78866	2.76812	1	2.40908	158.868	374.215	200.173	177.236	235.209	471.857	249.657	354.552	373.762	342.205	370	11.7717	2.49036	3.36717	47.4324	5.5887	9.22493	217.153	1.1795	3.06368	12.8651	2305.57	1873.7	1260.91	3752.54	1941.2	Naaladl1	N-acetylated-alpha-linked acidic dipeptidase-like protein [Fundulus heteroclitus]
g15050.t1	59.6162	4.88456	4.86849e-18	2.92829	3.77449	1.78866	0.922707	1	0.803025	6.66581	18.7108	11.638	15.1584	10.0948	13.456	1.59525	19.8197	28.1676	18.6093	16	0.840835	0.83012	0.841791	3.51351	2.79435	2.76748	9.2014	2.359	5.10613	10.7209	261.743	222.533	275.494	151.28	318.996	Gimap9	uncharacterized protein LOC116728243 [Xiphophorus hellerii]
g15088.t1	6451.66	2.58558	1.79159e-28	3930.74	4517.12	4350.92	4295.2	5004	5920.7	4927.14	4885.59	5675.83	4819.19	4054.08	3828.68	3074.05	3073.15	3360.61	3131.54	4186	2905.09	2806.64	3212.28	1859.53	1646.8	1729.67	1919.41	3836.91	4935.59	4864.09	25901.5	13158.3	12141.4	22576.1	19450.9	COX7B	PREDICTED: cytochrome c oxidase subunit 7B, mitochondrial-like [Cyprinodon variegatus]
g15097.t1	387.276	4.01956	3.56803e-06	2.92829	3.77449	2.68299	4.61354	2	7.22723	183.31	139.291	159.44	156.248	226.124	286.164	75.7745	246.645	258.925	228.481	101	3.36334	2.49036	1.68358	28.1081	2.79435	9.22493	15.6424	4.718	3.06368	26.8024	836.744	1819.34	1503.11	1799.65	1417.33	Kcnj15	PREDICTED: ATP-sensitive inward rectifier potassium channel 15-like [Cyprinodon variegatus]
g15102.t1	1624.89	2.06081	1.22845e-21	571.992	668.085	629.608	622.827	560	761.268	899.884	1049.88	928.709	906.004	991.311	1216.42	1066.43	812.608	893.778	1085.54	969	549.066	732.996	843.475	1084.8	687.41	808.104	1123.49	1627.71	981.399	1693.91	5510.54	2935.4	2980.48	5290.88	3455.79	slc37a2	glucose-6-phosphate exchanger SLC37A2 isoform X2 [Fundulus heteroclitus]
g15138.t1	96.0282	2.88601	1.08194e-17	6.83267	5.66174	2.68299	11.9952	1	2.40908	59.9923	66.5272	69.8277	69.9617	34.3224	45.7504	38.2861	46.246	54.1684	63.0649	29	43.7234	71.3903	53.0329	36.8919	39.1209	47.9696	33.125	14.154	5.10613	10.7209	257.567	287.085	302.741	259.338	391.612	Mfap3l	PREDICTED: microfibril-associated glycoprotein 3 [Cyprinodon variegatus]
g15155.t1	243.108	2.11915	1.54398e-07	98.5857	118.897	126.101	135.638	126	130.893	339.956	285.859	300.259	180.734	206.944	136.354	167.502	225.724	243.758	223.312	168	132.011	143.611	149.839	164.257	153.689	151.289	142.622	14.154	33.7005	23.5861	537.409	764.427	709.927	508.852	570.561	POF1B	protein POF1B isoform X4 [Xiphophorus couchianus]
g15159.t1	500.174	5.29851	3.05122e-11	1.95219	2.83087	1.78866	7.38166	3	4.01513	125.539	185.029	144.311	144.587	132.242	149.81	92.5247	107.907	157.088	108.554	113	3.36334	5.81084	1.68358	21.0811	2.79435	13.8374	2.76042	4.718	2.04245	9.64885	2603.51	2157.38	1781.63	2074.7	2006.04	KLF5	PREDICTED: Krueppel-like factor 5 [Cyprinodon variegatus]
g15186.t1	526.659	2.13764	1.94166e-22	618.845	555.794	555.379	501.03	469	509.118	509.934	587.31	449.225	507.222	483.542	522.99	360.527	400.798	371.595	356.679	333	279.157	236.584	318.197	250.338	231	237.081	229.115	260.669	263.476	257.303	2132.93	1080.39	880.975	1347.77	1253.94	foxred1	PREDICTED: FAD-dependent oxidoreductase domain-containing protein 1 [Cyprinodon variegatus]
g15190.t1	405.575	2.86252	1.48828e-18	213.765	139.656	194.07	160.551	162	167.029	589.924	549.889	722.717	528.211	345.243	102.266	209.776	274.173	310.927	301.885	191	141.26	104.595	101.015	117.703	98.7337	108.854	68.0904	103.796	109.271	135.084	1145.82	1217.99	1221.56	882.141	1821.91	GDPD5	glycerophosphodiester phosphodiesterase domain-containing protein 5 isoform X1 [Fundulus heteroclitus]
g1521.t1	143.658	4.60577	3.45383e-12	4.88048	7.54899	1.78866	2.76812	1	3.2121	63.3252	150.726	76.8105	44.3091	37.3508	16.1472	19.143	42.9427	41.168	55.828	40	2.52251	4.1506	4.20896	19.3243	3.7258	6.45745	3.68056	1.1795	6.12736	60.0373	126.695	224.232	887.03	848.741	811.753	HBEGF	proheparin-binding EGF-like growth factor [Fundulus heteroclitus]
g15217.t1	530.649	3.74018	1.02133e-26	1644.72	1075.73	801.32	1073.11	1323	988.524	145.537	232.845	182.716	166.742	154.451	198.252	85.346	176.175	206.923	182.992	251	58.0176	57.2783	62.2926	86.081	84.762	57.1945	92.9341	166.309	125.611	390.242	1996.49	1381.06	1353.25	2964.7	1980.11	USP2	ubiquitin carboxyl-terminal hydrolase 2 [Fundulus heteroclitus]
g1522.t1	361.13	4.25576	4.19793e-06	0.976096	0.943623	2.68299	23.0677	1	0.803025	164.423	154.884	180.388	183.066	204.925	155.192	146.763	205.905	209.09	150.942	153	4.20418	0.83012	1.68358	17.5676	0.93145	20.2948	5.52084	2.359	2.04245	5.36047	430.206	1416.74	1445.59	1723.02	2048.83	EREG	proepiregulin [Fundulus heteroclitus]
g15249.t1	242.05	4.75343	1.38988e-08	2.92829	1.88725	1.78866	5.53624	1	0.803025	84.4336	55.0928	59.3536	54.8033	58.5499	82.5301	8.77389	85.8854	108.337	111.656	80	4.20418	0.83012	3.36717	18.4459	0.93145	1.84499	10.1215	3.5385	4.08491	2.14419	2106.48	596.253	482.871	982.339	752.103	Slc22a4	solute carrier family 22 member 4 [Fundulus heteroclitus]
g15252.t1	270.722	3.59458	6.90658e-06	8.78487	2.83087	0.89433	5.53624	2	11.2424	136.649	91.4749	126.854	96.7803	97.9197	18.8384	23.1312	104.604	96.4197	99.2498	59	5.04501	13.2819	0.841791	18.4459	5.5887	23.0623	4.6007	337.337	124.59	415.973	293.765	1022.63	1165.55	736.755	1629.99	SLC22A5	solute carrier family 22 member 5-like [Xiphophorus couchianus]
g15268.t1	633.396	2.2841	9.47556e-24	190.339	179.288	117.157	127.334	169	183.893	268.854	369.018	380.561	290.341	242.276	279.885	467.409	410.708	385.679	394.931	345	333.812	282.241	360.287	347.838	382.826	426.192	457.31	148.617	589.248	191.905	835.351	1907.67	1575.76	1842.87	2308.18	stk10	PREDICTED: serine/threonine-protein kinase 10 [Poecilia mexicana]
g15278.t1	210.696	4.30792	1.2866e-30	8.78487	16.0416	12.5206	11.9952	8	10.4393	48.8826	80.0405	61.6811	37.3129	49.4646	61.0005	65.4054	57.2569	59.5852	60.9972	45	31.1109	49.8072	36.197	52.7027	49.3669	57.1945	46.007	8.2565	3.06368	8.57676	793.584	805.196	709.927	882.141	945.316	Sowaha	ankyrin repeat domain-containing protein SOWAHA-like [Xiphophorus hellerii]
g1528.t1	274.412	4.93315	2.6567e-11	0.976096	1.88725	0.89433	0.922707	4	1.60605	54.4374	110.186	57.026	57.1354	74.7016	80.7359	11.1668	59.4591	89.9195	85.8097	62	1.68167	0.83012	0.841791	21.0811	1.8629	4.61246	5.52084	66.052	51.0613	54.6768	971.792	1005.65	1289.67	1165.05	1260.42	ICMEL2	probable isoprenylcysteine alpha-carbonyl methylesterase ICME isoform X2 [Xiphophorus hellerii]
g15301.t1	414.766	2.82225	1.365e-18	89.8009	108.517	133.255	107.957	90	131.696	103.32	116.423	137.328	111.939	103.977	125.589	139.585	109.008	101.837	103.385	100	211.05	181.796	170.884	142.297	133.197	218.631	125.139	373.901	439.127	403.108	662.712	1795.55	1209.45	1375.28	1361.57	msxd	PREDICTED: homeobox protein MSH-D-like [Poecilia reticulata]
g15307.t1	507.444	2.25085	1.13399e-29	35.1395	44.3503	42.0335	65.5122	34	120.454	343.289	374.215	289.785	272.851	340.195	507.739	497.719	241.14	243.758	278.106	268	270.749	250.696	221.391	287.229	256.149	246.306	243.837	242.977	149.099	322.701	1216.83	854.459	1550.03	1705.34	1364.16	Fhl1	four and a half LIM domains protein 1-like [Xiphophorus couchianus]
g15317.t1	272.875	2.82185	1.36088e-13	18.5458	10.3799	16.9923	17.5314	17	23.2877	135.538	168.397	221.121	136.425	115.081	87.9125	92.5247	181.681	171.172	165.416	128	37.8376	31.5446	40.406	88.7161	155.552	62.7295	64.4098	259.49	130.717	257.303	285.412	1048.11	1049	770.154	1056.83	Rin1	PREDICTED: ras and Rab interactor 1-like [Poecilia formosa]
g1532.t1	3.4874	2.72884	3.71807e-09	0.976096	1.88725	4.47165	1.84541	3	0.803025	1.11097	1.03949	1.1638	3.49808	1.00948	2.6912	0.797626	4.40438	1.08337	2.0677	2	0.840835	0.83012	2.52537	0.878378	1.8629	2.76748	0.92014	1.1795	1.02123	1.07209	5.56901	13.5898	9.08222	9.82339	14.264	-	-
g1535.t1	1248.1	4.47578	2.53954e-11	27.3307	31.1396	43.8222	25.8358	14	15.2575	346.622	467.769	486.466	387.121	357.356	331.017	760.936	476.774	533.017	474.538	410	42.0418	13.2819	23.5702	81.6891	29.8064	102.397	47.8473	16.513	125.611	27.8745	3263.44	3988.61	5526.53	5807.59	6329.34	ITGA2	integrin alpha-2 [Fundulus heteroclitus]
g15350.t1	98.4859	2.39984	0.000155548	1.95219	0.943623	6.26031	27.6812	8	1.60605	37.7729	20.7897	24.4397	11.6603	19.1801	34.0885	15.1549	39.6394	43.3347	46.5233	25	91.6511	127.008	74.9194	60.6081	48.4354	119.924	101.215	2.359	2.04245	1.07209	414.891	283.687	190.727	257.373	210.07	Ca15	carbonic anhydrase 15-like [Fundulus heteroclitus]
g15370.t1	1161.74	2.15535	1.64123e-27	607.132	681.296	501.719	503.798	530	554.89	722.129	681.904	702.932	759.084	583.48	478.136	406.789	885.28	820.109	923.23	949	412.009	482.3	451.2	631.554	767.515	712.164	625.695	648.725	616.821	842.666	2170.52	2733.25	2629.3	3365.49	4005.6	nipsnap2	PREDICTED: protein NipSnap homolog 2 [Poecilia reticulata]
g15373.t1	513.981	4.39003	2.04247e-33	76.1355	99.0805	67.0747	78.4301	97	167.832	117.763	164.239	130.345	125.931	139.308	226.958	181.859	137.637	125.671	115.791	110	36.1559	53.9578	47.9821	101.013	48.4354	58.117	179.427	36.5645	59.2311	21.4419	2447.58	1917.86	1646.91	2137.57	2015.12	Bicdl1	PREDICTED: uncharacterized protein LOC103141978 [Poecilia formosa]
g15376.t1	1124.32	5.81288	9.98687e-12	0.976096	2.83087	0.89433	2.76812	1	0.803025	253.301	566.52	386.38	213.383	222.086	342.679	86.9413	168.467	192.839	164.382	161	27.7476	1.66024	1.68358	36.8919	0.93145	9.22493	7.36112	2.359	3.06368	58.9652	5408.9	3932.55	3835.72	6222.14	5070.21	Cldn4	claudin-4-like [Fundulus heteroclitus]
g15386.t1	396.597	2.17451	0.0375279	11.7132	11.3235	6.26031	89.5026	4	5.62118	1445.37	878.367	1702.63	555.029	408.84	98.6773	1285.77	595.692	491.849	512.79	219	4.20418	1.66024	0.841791	38.6486	4.65725	36.8997	23.0035	7.077	13.2759	16.0814	307.688	1066.8	1339.63	636.556	1779.11	Capn2	calpain-1 catalytic subunit-like [Amphiprion ocellaris]
g1539.t1	726.397	3.39723	1.28232e-19	45.8765	44.3503	37.5619	49.8262	26	78.6965	194.419	346.149	453.88	302.001	269.532	377.665	313.467	303.902	295.759	308.088	379	169.849	175.985	230.651	288.986	325.076	292.43	308.247	47.18	34.7217	48.2443	3228.63	1815.94	1636.31	3273.16	2568.82	agpat9l	PREDICTED: glycerol-3-phosphate acyltransferase 3-like [Cyprinodon variegatus]
g15407.t1	17.2249	2.09687	6.94685e-06	8.78487	32.0832	3.57732	0.922707	8	5.62118	4.44387	2.07897	2.32759	3.49808	9.08533	12.5589	2.39288	7.70766	11.917	9.30466	11	0.840835	10.7916	19.3612	11.4189	7.4516	18.4499	7.36112	8.2565	12.2547	24.6582	22.276	30.5771	62.0618	23.5761	77.8038	Olfr1	olfactory receptor 142-like [Fundulus heteroclitus]
g15418.t1	741.401	2.00008	8.93391e-28	1218.17	1270.12	1294.1	1035.28	1058	1101.75	521.044	647.6	718.062	584.18	513.826	460.195	513.671	503.2	551.434	558.28	473	549.066	527.126	555.582	449.729	431.262	351.47	417.744	214.669	573.929	350.575	2274.94	1452.41	1481.92	1829.12	1993.07	UBL3	ubiquitin-like protein 3 [Erpetoichthys calabaricus]
g15438.t1	1133.58	3.08689	3.81285e-28	242.072	215.146	182.443	241.749	179	240.105	233.303	203.739	235.087	265.854	276.598	488.004	703.507	277.476	283.842	238.82	350	403.601	383.515	351.869	496.283	733.983	570.1	331.25	739.546	324.75	850.171	4364.71	3054.31	2432.52	5740.79	2850.21	SMAD9	mothers against decapentaplegic homolog 9 [Fundulus heteroclitus]
g15493.t1	6257.97	3.93889	5.73475e-30	1041.49	589.765	568.794	322.025	559	555.693	749.903	1066.51	673.837	981.796	1202.29	1821.94	1479.6	965.66	1160.29	1136.2	1319	3150.61	1177.94	1874.67	1505.54	1656.12	2154.94	1136.37	549.647	4566.93	522.11	33297.1	19919.3	14104.7	28969.2	20991.5	SLC43A2	large neutral amino acids transporter small subunit 4 [Fundulus heteroclitus]
g15501.t1	233.171	2.12734	0.0472271	256.713	192.499	189.598	155.938	232	192.726	182.199	252.595	165.259	286.843	301.835	496.078	135.596	293.992	297.926	327.731	335	6.72668	3.32048	1.68358	38.6486	4.65725	0.922493	15.6424	3.5385	3.06368	4.28838	1988.14	237.822	284.576	275.055	143.937	slc47a1	PREDICTED: multidrug and toxin extrusion protein 1-like [Poecilia reticulata]
g15502.t1	11519.4	7.54435	5.80058e-18	4.88048	10.3799	18.7809	8.30436	18	7.22723	817.672	908.512	546.984	892.011	869.164	1060.33	137.989	473.471	808.192	594.465	424	101.741	7.47108	5.05075	291.621	39.1209	131.916	30.3646	11.795	6.12736	64.3257	52401.6	42892.8	48524.8	63467	54572.9	TMIGD1	transmembrane and immunoglobulin domain-containing protein 1 [Fundulus heteroclitus]
g15533.t1	344.08	2.91904	0.00035247	230.359	276.482	249.518	355.242	233	248.938	205.529	187.108	145.474	156.248	252.37	455.71	350.158	312.711	254.591	344.273	291	10.9309	8.3012	5.05075	63.2432	17.6976	48.8921	33.125	9.436	7.14859	13.9372	2191.41	421.284	485.899	1416.53	850.655	MIA	melanoma-derived growth regulatory protein-like [Xiphophorus maculatus]
g15541.t1	1260.08	5.34073	7.05354e-33	2.92829	4.71812	10.732	5.53624	2	7.22723	193.308	359.663	327.026	221.545	252.37	222.472	55.0362	276.375	249.175	296.715	288	57.1768	97.124	104.382	83.4459	52.1612	53.5046	77.2918	35.385	24.5094	68.6141	6117.56	4316.46	3991.63	6738.85	5630.4	Pdzk1	Na(+)/H(+) exchange regulatory cofactor NHE-RF3 isoform X2 [Fundulus heteroclitus]
g15544.t1	741.053	3.53858	6.31659e-06	1.95219	6.60536	1.78866	20.2996	2	13.6514	432.166	495.835	613.32	367.299	453.257	534.651	950.771	383.181	450.681	352.543	307	10.9309	21.5831	14.3105	47.4324	31.6693	68.2645	28.5243	9.436	9.19104	78.2629	1090.13	2809.69	2969.89	3013.82	3274.24	Trim16	PREDICTED: tripartite motif-containing protein 16-like [Cyprinodon variegatus]
g15557.t1	363.678	2.05837	3.5458e-06	29.2829	34.9141	39.3505	34.1402	24	12.0454	131.094	191.266	122.199	261.19	210.982	244.899	43.0718	214.713	191.756	257.429	212	271.59	299.673	329.14	231.892	261.738	300.733	470.192	33.026	30.6368	47.1722	871.55	1051.51	849.187	919.47	840.281	Mlxipl	carbohydrate-responsive element-binding protein-like isoform X1 [Xiphophorus maculatus]
g15573.t1	1035.41	2.181	5.04641e-22	1328.47	1039.87	1001.65	1098.02	1360	1323.39	439.943	543.652	906.597	791.733	536.035	486.21	829.531	483.38	448.514	404.236	481	640.717	835.101	797.176	733.445	916.547	780.429	599.011	286.618	457.51	582.147	3448.61	1698.73	1525.81	3919.53	2751.66	NUPR2	nuclear protein 2-like [Xiphophorus maculatus]
g15578.t1	1365.3	2.3078	0.00418759	786.734	986.086	980.186	859.04	1103	1019.84	465.495	544.691	507.415	538.705	511.807	611.799	287.943	305.003	306.593	389.762	379	124.444	200.059	85.8627	143.176	66.133	63.652	76.3716	12407.2	5184.77	3573.29	4572.16	3249.66	2586.92	3713.24	4181.95	DHRS11	PREDICTED: dehydrogenase/reductase SDR family member 11 [Cyprinodon variegatus]
g15602.t1	564.576	2.57783	2.48559e-29	195.219	151.923	188.704	223.295	192	210.393	299.961	200.621	238.578	396.449	274.579	443.151	192.228	300.599	358.595	293.614	288	202.641	185.117	178.46	235.405	206.782	230.623	208.872	521.339	309.432	399.891	2369.61	1382.76	1055.05	1831.08	1508.1	zgc:85789	ester hydrolase C11orf54 homolog isoform X1 [Fundulus heteroclitus]
g15613.t1	572.089	3.372	1.43027e-06	103.466	202.879	237.892	155.938	216	179.075	231.081	209.976	167.587	198.225	279.626	1168.88	433.111	183.883	237.258	200.567	347	52.9726	14.9422	11.7851	83.4459	14.9032	54.4271	44.1667	76.6675	29.6156	67.542	3154.84	986.96	1545.49	2422.45	1684.45	TM7SF2	LOW QUALITY PROTEIN: delta(14)-sterol reductase [Fundulus heteroclitus]
g15620.t1	696.867	3.63876	2.76515e-40	314.303	438.785	471.312	411.527	430	468.967	323.292	389.808	395.69	357.971	356.347	428.798	319.051	191.59	201.506	202.635	221	209.368	152.742	206.239	128.243	136.923	134.684	117.778	150.976	188.927	180.112	5087.29	1960.33	1369.9	1921.46	2137.01	ESRRG	PREDICTED: steroid hormone receptor ERR1 [Cyprinodon variegatus]
g15628.t1	252.534	3.77009	4.53598e-32	167.889	99.0805	103.742	148.556	119	118.045	51.1045	64.4482	43.0604	52.4713	45.4267	48.4416	74.1793	97.9974	66.0854	88.9112	77	49.6093	65.5795	49.6657	64.1216	112.705	104.242	63.4897	97.8985	18.3821	16.0814	1446.55	704.971	331.501	990.198	1142.42	Tmlhe	trimethyllysine dioxygenase, mitochondrial [Fundulus heteroclitus]
g15629.t1	7003.26	3.4277	4.59477e-27	1390.94	1196.51	1291.41	1066.65	1021	1186.87	1009.87	1283.77	1130.05	1188.18	1097.31	1342.91	1154.17	875.37	1098.53	1375.02	1378	1908.7	1976.52	2416.78	3199.93	3340.18	4060.81	2937.09	3691.83	3096.36	4477.07	30039.2	16024.1	14307.5	38851.5	22137.8	mpp1	PREDICTED: 55 kDa erythrocyte membrane protein [Cyprinodon variegatus]
g15637.t1	5823.11	3.2278	3.69347e-22	108.347	112.291	337.162	394.919	144	188.711	1866.43	2543.62	2449.79	1520.5	1463.75	1664.95	2577.93	1131.93	1215.54	1176.52	922	4160.45	5305.3	4290.61	2061.55	2287.64	2481.51	2442.05	1400.07	706.689	1519.16	21025.8	16684.9	17338	19513.2	22888.6	cldn7a	claudin-7 [Fundulus heteroclitus]
g1565.t1	5821.42	3.44567	1.07286e-10	783.805	606.75	593.835	941.161	610	606.284	3210.7	3014.51	2830.35	3692.81	3194	2585.34	2463.07	4173.15	4109.21	3198.74	3979	791.226	898.19	716.364	1382.57	1168.04	1894.8	1060	205.233	160.333	153.31	17112.2	19421.5	20088.4	27472.1	17468.2	VDAC2	voltage-dependent anion-selective channel protein 2 isoform X1 [Fundulus heteroclitus]
g15697.t1	189.196	2.28169	2.23208e-17	19.5219	38.6886	40.2448	42.4445	23	27.3029	141.093	158.002	151.293	125.931	86.8154	110.339	103.691	94.6941	122.421	115.791	86	51.291	83.8421	77.4448	42.1621	83.8305	60.8845	80.0522	193.438	159.311	231.572	513.741	541.894	522.228	440.088	503.131	MPZL2	myelin protein zero-like protein 2 isoform X2 [Xiphophorus maculatus]
g15707.t1	620.568	3.47273	2.75394e-08	1223.05	1300.31	1222.55	1514.16	999	1084.08	419.946	306.649	379.397	348.642	328.081	121.104	175.478	516.413	500.516	498.316	575	47.9276	38.1855	31.9881	90.4729	50.2983	40.5897	85.573	30.667	40.8491	62.1815	2621.61	1202.7	824.968	3752.54	2424.88	Gria3	PREDICTED: glutamate receptor 3 isoform X2 [Poecilia reticulata]
g15721.t1	108.182	3.38423	7.91554e-07	1.95219	4.71812	2.68299	12.9179	1	1.60605	93.3213	115.383	178.061	79.2899	48.4551	22.4267	51.0481	118.918	85.5861	123.028	77	2.52251	9.96144	7.57612	28.9865	2.79435	12.9149	13.8021	3.5385	6.12736	9.64885	126.695	310.867	446.542	389.006	593.902	Lpar6	lysophosphatidic acid receptor 6-like [Epinephelus lanceolatus]
g15744.t1	2256.22	3.70502	1.19105e-28	15.6175	28.3087	36.6675	32.2948	59	42.5603	865.444	930.341	821.639	1197.51	969.102	1197.58	752.959	750.946	837.443	651.327	512	238.797	431.662	381.331	302.162	314.83	295.198	523.56	391.594	309.432	978.823	9046.86	6438.17	7497.37	8228.08	9724.18	TM4SF1	transmembrane 4 L6 family member 4-like [Xiphophorus hellerii]
g15754.t1	1658.67	2.14958	1.24885e-10	117.132	167.021	169.923	155.015	115	143.742	722.129	572.757	820.476	613.331	582.471	641.402	701.911	742.138	746.44	708.188	552	1533.68	1603.79	1633.92	1284.19	1623.52	1566.39	1533.87	392.773	313.517	346.287	3504.3	4217.94	4525.97	4442.14	4567.08	F11r	junctional adhesion molecule A [Fundulus heteroclitus]
g15762.t1	180.512	3.54697	1.7417e-23	504.642	376.506	330.008	373.696	315	305.15	93.3213	61.3297	91.9398	71.1277	72.6827	63.6917	55.0362	116.716	100.753	107.521	83	26.0659	20.753	28.6209	43.0405	40.0524	22.1398	39.566	18.872	30.6368	33.2349	803.33	611.541	588.83	616.909	575.748	C2cd2l	phospholipid transfer protein C2CD2L isoform X1 [Fundulus heteroclitus]
g15763.t1	112.413	3.36942	2.62276e-22	253.785	231.188	180.655	199.305	177	126.878	74.4348	61.3297	46.5518	52.4713	61.5784	52.9269	36.6908	38.5383	58.5019	73.4035	60	21.8617	13.2819	21.0448	21.0811	36.3266	22.1398	16.5625	20.0515	21.4458	20.3698	522.095	370.322	313.337	375.254	348.82	C2cd2l	PREDICTED: C2 domain-containing protein 2-like isoform X1 [Poecilia reticulata]
g15797.t1	66417.8	2.3299	4.10773e-25	24969.5	29813.8	29944	24538.5	31721	35058.5	37273	37623.2	39176.8	45297.9	42287.2	50242.9	46565.4	28765	28890.2	30634.1	31794	38793.6	42646.6	47406.3	24392.5	28683.1	26879.6	24489.5	38074.3	68643.8	36336.5	228456	153550	132440	210272	171411	SLC25A6	ADP/ATP translocase 3 [Xiphophorus couchianus]
g15812.t1	2616.42	2.76114	0.00423978	1319.68	913.427	985.552	1695.94	584	580.587	2227.49	1226.59	2360.18	1542.65	1429.43	984.979	3531.09	1265.16	932.78	894.282	816	33.6334	57.2783	20.203	259.121	22.3548	125.459	76.3716	67.2315	78.6344	197.265	5323.97	8846.97	6384.8	6455.93	12684.6	-	lipocalin-like [Fundulus heteroclitus]
g15814.t1	685.262	2.57401	0.0321314	41.9721	27.3651	22.3582	19.3769	13	15.2575	652.138	1023.89	648.234	921.162	804.557	1843.47	109.275	864.359	902.445	748.509	453	5.04501	2.49036	0.841791	130	1.8629	3.68997	33.125	3.5385	2.04245	63.2536	2851.33	2571.87	1810.39	1053.07	1626.1	SAT1	diamine acetyltransferase 1 [Fundulus heteroclitus]
g15816.t1	4939.77	2.14062	1.14577e-34	3800.92	4455.79	4305.3	3724.05	4351	4920.94	5437.08	5389.74	6535.87	4977.77	4391.24	3679.77	2890.6	2779.16	2869.84	3662.94	3161	3046.35	3192.64	3254.37	2055.4	2147.92	2531.32	2128.28	2781.26	2714.42	2591.25	16846.3	8644.82	8361.7	14776.4	14235.5	PDHA1	pyruvate dehydrogenase E1 component subunit alpha, mitochondrial-like [Xiphophorus maculatus]
g15820.t1	552.657	4.05807	1.42797e-26	93.7052	48.1248	41.1392	23.0677	61	52.9997	111.097	146.568	182.716	113.105	118.109	49.3386	118.846	167.366	127.837	146.807	127	85.7652	39.8458	66.5015	54.4594	58.6814	94.0942	64.4098	214.669	383.981	275.528	786.623	2366.33	2284.18	2528.54	2606.43	liph	lipase member H-like isoform X1 [Xiphophorus maculatus]
g15821.t1	2274.16	5.47208	4.3406e-09	1.95219	0.943623	0.89433	3.69083	2	1.60605	367.73	629.929	437.587	809.223	566.319	688.947	119.644	445.943	540.601	568.618	704	13.4534	1.66024	2.52537	155.473	7.4516	25.8298	23.0035	49.539	2.04245	31.0907	9982.45	8350.94	8441.92	11139.7	10827.7	PCYT1B	PREDICTED: choline-phosphate cytidylyltransferase B-like [Poecilia mexicana]
g15823.t1	134.782	4.68009	1.0658e-09	19.5219	6.60536	2.68299	20.2996	9	3.2121	37.7729	87.3169	18.6207	22.1545	14.1327	17.0443	46.2623	53.9536	95.3364	64.0988	36	1.68167	0.83012	0.841791	10.5405	0.93145	1.84499	5.52084	12.9745	10.2123	7.50466	307.688	370.322	1425.91	298.631	339.743	slc51a	organic solute transporter subunit alpha-like [Xiphophorus maculatus]
g15828.t1	196.682	3.6268	4.58748e-09	41.9721	32.0832	16.0979	64.5895	25	58.6208	101.098	112.265	128.017	114.271	89.8438	59.2064	76.5721	139.839	166.839	134.401	144	14.2942	3.32048	6.73433	20.2027	13.0403	32.2872	21.1632	18.872	16.3396	37.5233	144.794	572.471	1103.49	666.026	1050.35	Adgrg2	PREDICTED: adhesion G-protein coupled receptor G2-like [Poecilia reticulata]
g15834.t1	550.901	3.4478	3.40045e-14	60.518	71.7154	51.8711	52.5943	85	100.378	158.868	160.081	148.966	143.421	160.508	279.885	61.4172	169.569	190.673	153.01	148	189.188	286.391	170.884	158.108	199.33	208.483	217.153	8.2565	21.4458	55.7489	1665.13	2116.61	1598.47	1750.53	2487.13	tmem45b	PREDICTED: transmembrane protein 45B [Cyprinodon variegatus]
g15859.t1	2688.22	5.86587	5.64933e-110	224.502	231.188	229.843	173.469	271	202.362	214.417	249.477	164.095	311.329	416.916	331.914	137.192	175.074	239.424	175.755	264	157.236	113.726	119.534	184.459	131.335	128.226	138.941	314.926	221.606	274.456	17386.4	14199.7	10806.3	8414.72	7926.91	Prdm15	PREDICTED: PR domain zinc finger protein 15 [Poecilia reticulata]
g15860.t1	1340.89	2.34355	1.16979e-18	561.255	538.809	473.101	478.885	426	407.937	542.152	651.758	544.656	481.57	557.234	540.931	446.671	585.782	595.852	634.785	593	791.226	613.459	580.836	515.608	692.999	697.404	510.678	1740.94	1314.32	1335.83	2680.09	3234.37	3915.95	4310.51	4060.06	C2CD2	PREDICTED: C2 domain-containing protein 2 isoform X3 [Poecilia mexicana]
g15865.t1	1441.45	4.70689	5.28174e-10	10.7371	3.77449	18.7809	15.686	1	2.40908	243.302	318.083	265.345	401.114	415.906	636.917	52.6433	437.135	588.269	409.405	583	123.603	154.402	70.7105	160.743	149.964	94.0942	83.7327	2.359	1.02123	2.14419	4400.91	3285.34	6085.09	7173.04	8372.99	mogat2-a	2-acylglycerol O-acyltransferase 2 [Fundulus heteroclitus]
g15878.t1	452.896	2.74638	0.000218824	0.976096	4.71812	16.0979	26.7585	1	8.83328	37.7729	67.5667	33.7501	45.4751	53.5025	69.0741	11.1668	57.2569	52.0017	55.828	54	629.786	400.118	604.406	149.324	550.487	590.395	349.653	21.231	11.2335	16.0814	1202.91	1146.64	1416.83	1520.66	1547	IGSF5	immunoglobulin superfamily member 5 [Fundulus heteroclitus]
g15881.t1	694.995	4.77964	1.46429e-08	0.976096	0.943623	0.89433	3.69083	2	4.01513	127.761	252.595	141.983	288.009	228.143	305.9	118.049	213.612	275.175	277.072	262	4.20418	9.13132	1.68358	36.8919	2.79435	21.2173	17.4827	3.5385	2.04245	32.1628	3088.02	2621.13	2353.81	3055.08	3122.53	Tmprss2	transmembrane protease serine 2 [Fundulus heteroclitus]
g15885.t1	90.7724	2.25946	0.00792036	6.83267	48.1248	41.1392	19.3769	19	24.0908	24.4413	55.0928	27.9311	37.3129	27.256	8.07359	145.168	12.112	6.50021	9.30466	14	24.3842	168.514	319.039	7.9054	2.79435	11.9924	8.28126	5.8975	87.8255	34.307	41.7676	149.488	446.542	131.633	433.108	mmp13	PREDICTED: collagenase 3-like [Poecilia latipinna]
g15886.t1	25.689	2.17506	0.0132429	0.976096	12.2671	10.732	1.84541	2	4.01513	5.55484	6.23692	2.32759	5.83014	2.01896	2.6912	35.8932	2.20219	2.16674	4.13541	2	2.52251	70.5602	90.0717	1.75676	1.8629	4.61246	4.6007	8.2565	18.3821	4.28838	8.35351	62.8529	113.528	43.2229	105.035	MMP13	collagenase 3-like [Xiphophorus hellerii]
g1590.t1	1535.72	3.31718	3.42413e-99	192.291	152.867	131.467	207.609	154	192.726	694.355	588.35	678.493	844.204	667.267	867.463	335.801	624.321	651.104	617.209	538	433.03	444.944	437.731	404.932	470.382	474.161	460.99	662.879	465.679	474.938	5310.05	4555.98	4286.81	6467.72	5524.07	fahd2	PREDICTED: fumarylacetoacetate hydrolase domain-containing protein 2-like isoform X1 [Poecilia mexicana]
g15900.t1	20.0527	2.05771	0.0228992	5.85658	2.83087	4.47165	12.9179	1	3.2121	22.2194	15.5923	11.638	24.4866	39.3698	34.9856	17.5478	22.0219	29.2509	27.914	29	0.840835	0.83012	0.841791	4.39189	0.93145	2.76748	0.92014	1.1795	1.02123	1.07209	26.4528	64.5516	24.2192	84.4812	50.5725	bhlha9	class A basic helix-loop-helix protein 9 [Xiphophorus hellerii]
g15976.t1	124.248	2.31049	0.012249	384.582	387.829	432.856	223.295	383	300.331	82.2116	91.4749	55.8622	103.776	94.8913	51.1328	58.2267	64.9646	62.8353	72.3696	110	0.840835	6.64096	0.841791	6.14864	2.79435	0.922493	3.68056	304.311	165.439	187.617	923.063	220.834	115.041	239.691	156.904	Rab39a	ras-related protein Rab-39B-like [Fundulus heteroclitus]
g16030.t1	11235.7	3.44589	5.46831e-20	647.152	749.237	692.211	759.388	545	652.056	2615.22	2234.9	2662.76	2096.52	2152.21	2549.46	2203.04	3989.27	4280.39	4462.1	3761	3221.24	2661.36	3245.95	6694.12	7792.51	6774.79	6658.13	1058.01	1399.08	1791.47	14490.6	34791.6	42386.7	55225.2	49312	-	PREDICTED: protein S100-A14-like [Cyprinodon variegatus]
g1606.t1	10910.5	2.69512	2.62947e-05	203.028	239.68	309.438	342.324	346	321.21	8401.14	9782.61	9176.53	16311.6	12340.9	13268.5	6502.25	8899.05	7185.98	6421.25	12089	343.902	2905.42	397.325	924.053	504.846	550.728	3359.43	6458.94	1278.58	2471.18	39044.3	32498.3	22463.4	35425.1	33113.3	bhmt	betaine--homocysteine S-methyltransferase 1 [Fundulus heteroclitus]
g16072.t1	25.4364	2.97385	8.90007e-20	30.259	37.7449	45.6108	22.145	23	13.6514	2.22194	15.5923	8.14657	16.3244	7.06637	14.3531	17.5478	22.0219	18.4173	17.5755	16	6.72668	6.64096	4.20896	8.78378	5.5887	3.68997	9.2014	5.8975	11.2335	7.50466	84.9274	66.2503	107.473	66.7991	77.8038	Kdf1	keratinocyte differentiation factor 1-like [Fundulus heteroclitus]
g16077.t1	236.094	2.37991	5.91783e-31	101.514	106.629	73.3351	83.9664	85	63.439	172.2	141.37	102.414	167.908	145.365	159.678	118.049	144.243	184.173	134.401	168	152.191	70.5602	67.3433	109.797	135.06	109.777	121.458	127.386	118.462	153.31	581.962	608.144	653.92	744.613	648.365	TPBG	trophoblast glycoprotein-like [Fundulus heteroclitus]
g16140.t1	1349.15	5.01538	1.72537e-24	10.7371	40.5758	30.4072	16.6087	12	2.40908	177.755	220.371	192.026	243.7	293.759	253.87	82.1555	190.489	235.091	294.648	277	167.326	263.978	175.093	122.094	145.306	169.739	278.802	8.2565	13.2759	18.2256	5083.11	3322.71	4143	9762.49	5784.71	Abhd5	1-acylglycerol-3-phosphate O-acyltransferase ABHD5-like [Xiphophorus maculatus]
g16149.t1	554.341	2.12017	3.06739e-27	213.765	252.891	228.054	191.923	197	260.983	315.515	427.229	415.475	409.276	316.977	409.959	258.431	301.7	297.926	263.632	198	464.982	574.443	523.594	265.27	374.443	340.4	246.598	228.823	272.668	322.701	1567.68	1435.42	1050.51	1559.96	1421.22	znrf2	PREDICTED: E3 ubiquitin-protein ligase ZNRF2 [Poecilia formosa]
g1616.t1	2235.03	2.5505	1.9379e-83	898.009	824.727	786.116	809.214	665	604.678	923.214	1006.22	889.14	1132.21	1071.06	1139.27	739.4	957.952	1035.7	1005.94	1065	1305.82	1243.52	1293.83	953.918	998.515	987.99	1048.96	1515.66	1260.19	1242.56	9003.7	5648.26	4663.72	7110.17	5617.43	Hsd17b4	PREDICTED: peroxisomal multifunctional enzyme type 2 [Cyprinodon variegatus]
g16162.t1	2574.81	5.8182	3.80373e-87	22.4502	28.3087	42.0335	31.372	24	33.7271	137.76	166.318	95.4312	115.437	188.773	180.31	40.6789	128.828	176.589	169.552	142	259.818	276.43	305.57	238.919	182.564	246.306	222.674	240.618	122.547	246.582	3275.97	9310.72	11446.6	17287.2	14898.1	tert	PREDICTED: telomerase reverse transcriptase [Poecilia latipinna]
g16163.t1	4200.76	7.00897	1.06013e-29	20.498	18.8725	8.04897	9.22707	10	20.8787	282.186	494.796	274.656	310.163	403.793	422.518	83.7508	229.028	333.677	279.14	310	52.1318	19.9229	18.5194	163.378	42.8467	107.932	37.7257	30.667	19.4033	41.8117	10056.2	18011.6	22369.5	24774.6	19732.3	SLC6A18	sodium-dependent neutral amino acid transporter B(0)AT3-like [Xiphophorus hellerii]
g16164.t1	608.856	5.51927	1.20108e-07	0.976096	0.943623	0.89433	0.922707	3	0.803025	44.4387	50.9349	37.2414	141.089	134.261	627.946	65.4054	49.5493	60.6686	7.23696	32	4.20418	0.83012	0.841791	21.9594	1.8629	3.68997	0.92014	17.6925	1.02123	4.28838	4723.91	2607.54	1852.77	2787.88	1093.14	Slc6a19	LOW QUALITY PROTEIN: sodium-dependent neutral amino acid transporter B(0)AT1 [Fundulus heteroclitus]
g16165.t1	3.79003	3.26189	1.20882e-10	0.976096	0.943623	0.89433	0.922707	1	0.803025	1.11097	1.03949	1.1638	1.16603	1.00948	0.897066	0.797626	1.10109	2.16674	1.03385	1	0.840835	1.66024	0.841791	0.878378	0.93145	0.922493	0.92014	7.077	1.02123	1.07209	20.8838	5.09618	6.05481	13.7528	16.8575	-	uncharacterized protein LOC117828746 [Notolabrus celidotus]
g16166.t1	8640.74	6.25552	1.37582e-20	15.6175	4.71812	6.26031	23.0677	10	32.121	846.557	1448.01	926.381	605.169	997.368	529.269	86.1437	608.905	820.109	868.435	840	89.1286	47.3168	24.4119	326.756	32.6008	190.956	59.8091	944.779	523.889	2001.6	30742.3	34254.8	35320.7	41906.6	49159	Slc6a19	sodium-dependent neutral amino acid transporter B(0)AT1-like [Xiphophorus maculatus]
g16170.t1	2367.11	6.69662	1.61521e-13	0.976096	0.943623	1.78866	0.922707	1	4.81815	364.397	404.36	313.061	223.877	400.764	398.297	32.7027	201.5	171.172	278.106	171	21.0209	3.32048	5.05075	42.1621	1.8629	13.8374	7.36112	8.2565	4.08491	4.28838	21848.6	4666.4	3990.12	14666.3	7501.58	-	PREDICTED: glutathione S-transferase A-like [Cyprinodon variegatus]
g16176.t1	243.411	2.26152	0.00731767	627.63	771.884	523.183	566.542	433	605.481	317.737	219.332	226.94	348.642	418.935	723.035	147.561	180.579	221.007	178.856	261	47.9276	17.4325	21.8866	50.0675	20.4919	35.9772	25.7639	3.5385	2.04245	4.28838	503.995	494.329	649.379	852.671	722.279	heyl	PREDICTED: hairy/enhancer-of-split related with YRPW motif-like protein [Poecilia latipinna]
g16203.t1	1164.1	6.85615	5.60234e-16	8.78487	8.49261	7.15464	2.76812	5	12.8484	88.8774	109.146	105.905	160.912	193.82	225.164	111.668	31.9317	41.168	50.6587	72	15.135	1.66024	4.20896	26.3513	5.5887	22.1398	0.92014	2.359	2.04245	8.57676	6983.54	5125.06	4292.86	5624.88	4135.27	EVX1	PREDICTED: homeobox even-skipped homolog protein 1 [Poecilia reticulata]
g16204.t1	1484.36	6.85392	3.67114e-18	0.976096	0.943623	1.78866	0.922707	1	2.40908	193.308	261.951	226.94	235.538	217.039	223.369	73.3816	105.705	99.6698	87.8774	112	10.09	7.47108	2.52537	32.5	7.4516	23.9848	5.52084	4.718	1.02123	22.514	7786.87	6526.51	4542.62	7603.31	6907.68	hoxa13a	PREDICTED: homeobox protein Hox-A13a [Poecilia latipinna]
g16205.t1	313.999	3.12401	1.61764e-18	0.976096	0.943623	4.47165	12.9179	2	5.62118	287.741	224.529	243.233	241.368	243.285	227.855	219.347	124.424	139.754	157.145	179	52.1318	120.367	114.484	94.8648	136.923	101.474	60.7292	53.0775	42.8915	38.5954	1360.23	986.96	717.495	1066.82	1016.64	hoxa11a	homeobox protein Hox-A11a [Xiphophorus maculatus]
g16206.t1	442.537	3.19567	1.30639e-18	0.976096	7.54899	0.89433	3.69083	1	2.40908	234.414	286.898	300.259	242.534	249.342	274.502	279.169	227.927	261.092	250.192	288	52.9726	85.5023	108.591	149.324	176.044	164.204	84.6529	70.77	95.9953	57.8931	1399.21	1403.15	1288.16	1880.2	1399.17	hoxa10	PREDICTED: homeobox protein Hox-A10 [Poecilia latipinna]
g16208.t1	801.83	3.10284	3.13087e-23	17.5697	16.0416	23.2526	30.4493	5	10.4393	367.73	398.124	449.225	525.879	493.636	735.594	444.278	218.017	215.59	222.278	248	238.797	315.446	398.167	354.865	395.866	307.19	299.966	147.437	229.776	250.87	3193.83	1999.4	1824.01	3662.16	2400.25	hoxa7	PREDICTED: homeobox protein Hox-A7-like isoform X2 [Poecilia reticulata]
g16224.t1	73.8659	2.99177	7.14677e-09	1.95219	6.60536	10.732	12.9179	2	1.60605	58.8813	57.1718	94.2674	65.2976	48.4551	24.2208	62.2149	77.0766	73.669	48.591	45	12.6125	16.6024	6.73433	16.6892	10.246	13.8374	17.4827	17.6925	4.08491	7.50466	75.1816	202.148	317.878	210.221	374.755	-	PREDICTED: proline-rich protein 15-like [Poecilia latipinna]
g16241.t1	659.375	4.93123	9.89898e-09	107.371	60.3919	126.995	101.498	124	46.5755	176.644	223.49	211.811	181.9	195.839	226.958	114.858	188.287	235.091	210.906	292	5.88585	0.83012	3.36717	34.2567	7.4516	47.0471	7.36112	3.5385	8.16981	4.28838	811.683	2937.1	1834.61	4314.43	3820.17	dlx5a	PREDICTED: homeobox protein DLX-5 [Poecilia latipinna]
g16242.t1	920.778	4.98519	1.161e-09	184.482	129.276	251.307	151.324	216	76.2874	343.289	332.636	340.992	381.291	359.375	348.062	151.549	208.107	252.425	290.512	346	5.88585	10.7916	2.52537	41.2837	4.65725	64.5745	11.0417	16.513	8.16981	10.7209	1285.05	4148.29	2438.58	6381.28	4978.15	DLX5	homeobox protein DLX-5 [Fundulus heteroclitus]
g16246.t1	800.746	2.61612	0.000151201	1965.86	1763.63	1825.33	1983.82	1797	1805.2	384.395	339.912	382.889	475.739	537.044	385.738	224.133	354.552	377.012	303.952	486	32.7926	73.8807	42.0896	67.6351	38.1895	55.3496	42.3264	1986.28	823.109	831.946	3816.16	1863.5	1285.13	2781.99	1913.97	DYNC1I1	cytoplasmic dynein 1 intermediate chain 1 isoform X2 [Xiphophorus maculatus]
g16256.t1	32027.5	2.9404	0.000217796	119.084	121.727	194.07	197.459	93	143.742	23198.1	27959.1	25139.1	43394.9	39301.1	27155.1	39442.6	21306.2	31533.6	21626.1	22962	2822.68	2636.46	2344.39	7215.87	7356.59	6448.22	4320.06	340.875	309.432	666.843	52439.2	101925	125807	114138	112425	TFPI2	tissue factor pathway inhibitor 2 isoform X1 [Xiphophorus hellerii]
g16265.t1	1135.26	2.54888	1.21132e-16	599.323	564.287	437.327	565.619	504	563.724	781.01	782.734	777.415	836.042	860.078	989.464	417.956	792.788	722.606	645.123	755	275.794	314.615	245.803	348.716	331.596	244.461	411.303	818.573	323.729	603.589	3486.2	3946.14	2533.94	2744.66	3608.8	btd	biotinidase [Fundulus heteroclitus]
g16273.t1	126.83	2.6738	0.00481406	33.1873	34.9141	36.6675	55.3624	41	32.121	105.542	139.291	130.345	117.769	150.413	357.929	262.419	66.0657	59.5852	41.3541	55	6.72668	4.1506	1.68358	9.66215	0.93145	14.7599	1.84028	8.2565	2.04245	18.2256	150.363	511.317	310.309	495.099	422.734	sp8b	transcription factor Sp8 [Fundulus heteroclitus]
g16277.t1	80.9883	3.96447	1.12646e-31	61.4941	60.3919	74.2294	54.4397	41	65.8481	18.8865	20.7897	18.6207	25.6526	10.0948	11.6619	7.97626	28.6285	30.3343	36.1848	38	10.09	12.4518	11.7851	24.5946	14.9032	13.8374	36.8056	5.8975	26.5519	8.57676	232.506	261.604	278.521	371.324	381.239	il6	interleukin-6-like [Fundulus heteroclitus]
g16280.t1	457.617	5.34678	9.0416e-22	112.251	55.6738	40.2448	66.4349	78	56.2118	116.652	126.817	79.1381	87.4521	119.119	149.81	44.6671	55.0547	93.1696	100.284	98	10.9309	9.96144	7.57612	21.0811	5.5887	13.8374	14.7222	17.6925	38.8066	22.514	2119.01	1246.87	1385.04	3084.55	1890.63	-	PREDICTED: uncharacterized protein LOC103472276 isoform X2 [Poecilia reticulata]
g16293.t1	6883.25	2.99349	5.50272e-15	1640.82	1818.36	1513.21	1606.43	1187	1439.82	4191.68	4560.23	5589.71	3313.85	3594.76	3956.96	3395.5	4325.1	4174.22	4483.81	4437	2693.2	2522.73	2561.57	1997.43	2041.74	1637.42	1959.9	356.209	1320.45	714.015	37908.2	13476	12586.4	28006.5	17429.3	Ndrg1	protein NDRG1-like isoform X2 [Xiphophorus hellerii]
g16345.t1	752.908	2.77015	5.06416e-14	47.8287	19.8161	60.8144	37.831	71	49.7876	127.761	214.134	135	211.051	186.754	285.267	672.399	209.208	193.923	201.601	212	471.709	525.466	510.967	552.5	709.765	498.146	388.299	150.976	143.993	93.2722	2918.16	1712.32	2187.3	2817.35	1772.63	Tinagl1	tubulointerstitial nephritis antigen-like [Fundulus heteroclitus]
g16348.t1	254.728	3.19601	0.000607365	0.976096	2.83087	0.89433	10.1498	1	7.22723	269.965	283.78	306.078	262.356	252.37	193.766	142.775	231.23	278.426	192.296	135	0.840835	0.83012	5.05075	25.473	1.8629	28.5973	7.36112	2.359	3.06368	15.0093	327.179	845.966	1130.74	760.331	1186.51	RAB25	ras-related protein Rab-25-like [Xiphophorus couchianus]
g16372.t1	428.494	2.88345	4.17624e-20	24.4024	22.647	22.3582	43.3672	17	13.6514	265.521	175.673	185.043	202.889	231.171	194.663	258.431	307.205	357.511	295.682	293	141.26	85.5023	83.3373	155.473	183.496	140.219	179.427	92.001	68.4222	151.165	1074.82	1369.17	1350.22	1449.93	1441.96	fam83h	PREDICTED: protein FAM83H [Poecilia latipinna]
g1639.t1	202.755	3.37484	1.81113e-17	280.14	383.111	371.147	283.271	314	276.241	91.0994	73.8036	75.6467	116.603	118.109	52.9269	65.4054	56.1558	63.9187	64.0988	80	113.513	112.896	127.11	55.3378	45.6411	71.9544	56.1285	12.9745	12.2547	18.2256	1155.57	339.745	364.802	1062.89	549.813	LZTS3	rootletin-like isoform X2 [Xiphophorus couchianus]
g16390.t1	751.203	2.61945	1.64691e-06	18.5458	16.0416	21.4639	27.6812	33	42.5603	461.052	392.926	593.536	450.087	305.873	43.0592	226.526	602.299	677.105	814.675	562	164.804	207.53	200.346	618.378	710.697	773.971	299.966	40.103	61.2736	82.5513	1001.03	2028.28	2635.36	2984.35	2357.45	-	PREDICTED: uncharacterized protein LOC106946252 isoform X1 [Poecilia latipinna]
g16425.t1	675.696	2.23993	1.86749e-21	255.737	140.6	112.686	216.836	104	156.59	686.578	489.598	546.984	560.859	521.902	616.284	333.408	494.391	490.766	513.824	461	438.916	307.144	310.621	313.581	384.689	395.749	445.348	213.489	174.63	188.689	2320.88	1479.59	1722.59	1467.62	1884.15	RIDA	2-iminobutanoate/2-iminopropanoate deaminase-like isoform X2 [Xiphophorus maculatus]
g16434.t1	329.779	2.7449	5.06439e-05	8.78487	5.66174	6.26031	17.5314	3	17.6666	348.844	374.215	402.673	322.99	295.778	305.002	402.004	293.992	306.593	290.512	204	19.3392	19.9229	15.994	27.2297	8.38305	23.0623	14.7222	114.411	69.4434	83.6234	694.734	949.588	1207.93	958.763	1169.65	grhl2	grainyhead-like protein 2 homolog [Xiphophorus maculatus]
g1644.t1	573.196	3.1523	3.90744e-21	96.6335	54.7302	55.4485	79.3528	77	53.8027	127.761	119.541	123.362	87.4521	122.147	127.383	186.645	222.421	228.591	230.549	151	269.067	194.248	277.791	342.567	340.911	420.657	276.042	40.103	173.609	52.5326	796.368	2317.06	2088.91	2117.92	2179.8	SLC35D2	PREDICTED: UDP-N-acetylglucosamine/UDP-glucose/GDP-mannose transporter [Poecilia reticulata]
g16446.t1	11.4359	4.4426	4.52865e-22	1.95219	0.943623	2.68299	0.922707	2	0.803025	1.11097	5.19744	3.49139	1.16603	3.02844	3.58826	0.797626	2.20219	3.2501	3.10155	11	0.840835	0.83012	0.841791	0.878378	1.8629	0.922493	0.92014	1.1795	1.02123	1.07209	25.0605	62.8529	60.5481	51.0817	28.5281	RXFP3	relaxin-3 receptor 1-like [Xiphophorus hellerii]
g16463.t1	2392.53	5.52248	9.01979e-11	2.92829	7.54899	8.9433	5.53624	11	11.2424	442.165	492.717	448.061	429.098	581.461	1507.97	181.061	255.454	274.092	289.478	232	16.8167	48.1469	5.05075	80.8107	9.3145	42.4347	51.5278	4.718	5.10613	25.7303	12826.8	7311.32	7800.11	13147.6	10239	ANXA2	PREDICTED: annexin A2-like [Cyprinodon variegatus]
g16476.t1	13533.5	2.2703	7.46041e-26	6058.63	6037.3	5803.31	4756.56	5350	5812.3	7567.91	7462.48	7813.72	7204.89	7201.64	8781.38	12094.4	6381.94	6677.88	6711.76	5621	10729.1	7496.81	9466.78	8621.28	9284.7	8275.68	8483.69	4173.07	8872.42	3282.75	30243.9	35068.5	33652.6	43050	37854.1	CAP1	PREDICTED: adenylyl cyclase-associated protein 1 isoform X1 [Cyprinodon variegatus]
g16525.t1	610.79	2.53457	2.57002e-33	232.311	168.909	158.296	229.754	237	228.862	418.835	371.097	370.087	468.743	390.669	492.489	193.026	280.779	331.511	319.46	263	422.94	415.89	380.49	274.932	271.984	272.135	278.802	267.746	279.816	229.428	2549.21	1206.1	1262.43	2000.04	1689.64	Hsd17b8	estradiol 17-beta-dehydrogenase 8 [Fundulus heteroclitus]
g16538.t1	9.72558	2.27883	0.000131292	0.976096	2.83087	4.47165	8.30436	1	7.22723	2.22194	2.07897	1.1638	1.16603	3.02844	3.58826	2.39288	1.10109	1.08337	3.10155	2	5.88585	2.49036	0.841791	6.14864	4.65725	8.30243	11.0417	15.3335	9.19104	11.793	1.39225	22.0834	12.1096	31.4349	62.243	chs-2	chitin synthase chs-2-like [Xiphophorus hellerii]
g16550.t1	147.716	2.4024	1.66483e-05	0.976096	1.88725	6.26031	11.9952	1	1.60605	71.1019	60.2902	100.086	61.7995	48.4551	84.3242	69.3935	40.7405	28.1676	28.9478	30	189.188	229.943	225.6	65.8783	77.3104	122.692	80.0522	8.2565	9.19104	12.8651	414.891	268.399	360.261	477.417	513.505	TMEM238	transmembrane protein 238-like [Fundulus heteroclitus]
g16565.t1	72.824	3.3636	0.000122249	0.976096	1.88725	0.89433	6.45895	1	3.2121	112.208	55.0928	103.578	55.9693	40.3793	34.0885	27.1193	63.8635	75.8357	77.5389	56	0.840835	1.66024	0.841791	7.02702	0.93145	11.0699	2.76042	2.359	1.02123	1.07209	38.9831	246.315	339.069	231.832	398.096	STYK1	tyrosine-protein kinase STYK1 [Fundulus heteroclitus]
g1657.t1	65806.6	2.92749	4.87711e-43	20019.7	19705.7	18027.9	14876.8	15022	15110.5	17544.4	19777.3	19221.2	27166.1	23863.1	27016	17194.4	19589.6	21537.4	18402.6	16809	38199.2	32250.2	35489.9	34845.2	48548.1	41150.6	29473	19494.8	33315.5	20462	224446	216931	136335	210635	247637	sepp1a	selenoprotein P [Xiphophorus maculatus]
g16593.t1	4403.74	5.96316	2.91655e-46	8.78487	17.9288	16.0979	27.6812	12	7.22723	382.173	496.875	430.604	474.573	496.665	376.768	171.49	534.031	444.181	621.345	529	133.693	127.838	127.11	478.716	593.334	350.547	187.709	133.283	131.738	136.156	22039.4	15025.2	12205	24006.4	23089.6	-	venom phosphodiesterase 2-like isoform X3 [Xiphophorus maculatus]
g16594.t1	9.20489	3.34458	4.89243e-16	1.95219	2.83087	2.68299	0.922707	13	4.01513	1.11097	1.03949	2.32759	1.16603	4.03793	2.6912	1.59525	2.20219	1.08337	2.0677	4	0.840835	0.83012	0.841791	2.63513	4.65725	5.53496	0.92014	2.359	9.19104	3.21628	27.845	27.1796	19.6781	39.2936	42.7921	-	uncharacterized protein LOC116730540 [Xiphophorus hellerii]
g16596.t1	381.884	4.48134	4.60326e-14	0.976096	0.943623	0.89433	3.69083	2	13.6514	74.4348	34.3031	40.7328	34.9808	80.7585	142.634	41.4766	90.2897	82.336	100.284	120	2.52251	46.4867	5.05075	21.0811	11.1774	11.0699	145.382	25.949	230.797	22.514	824.213	1333.5	1577.28	2351.72	1549.59	Deptor	DEP domain-containing mTOR-interacting protein [Fundulus heteroclitus]
g16607.t1	213.897	4.47456	3.08964e-12	0.976096	0.943623	3.57732	4.61354	2	0.803025	34.44	84.1985	22.1121	46.6411	99.9387	145.325	31.9051	55.0547	49.8349	90.9789	95	11.7717	4.98072	10.1015	18.4459	7.4516	7.37994	10.1215	3.5385	7.14859	17.1535	1765.38	606.445	379.939	644.415	848.061	H2-L	PREDICTED: uncharacterized protein LOC103149743 isoform X1 [Poecilia formosa]
g16608.t1	9.50486	3.25675	2.15107e-09	0.976096	0.943623	0.89433	0.922707	1	1.60605	8.88774	7.27641	1.1638	13.9923	3.02844	0.897066	7.97626	11.0109	9.75031	4.13541	7	0.840835	0.83012	0.841791	0.878378	0.93145	3.68997	0.92014	1.1795	1.02123	4.28838	20.8838	50.9618	36.3289	15.7174	36.3084	B2M	PREDICTED: H-2 class I histocompatibility antigen, L-D alpha chain-like [Poecilia latipinna]
g16644.t1	153.418	3.86588	1.77605e-08	6.83267	7.54899	6.26031	23.9904	7	4.01513	134.427	97.7118	157.112	99.1124	61.5784	55.6181	44.6671	110.109	115.92	99.2498	72	1.68167	6.64096	1.68358	8.78378	1.8629	5.53496	9.2014	28.308	16.3396	28.9466	426.029	480.74	685.707	400.794	858.435	BNIPL	PREDICTED: protein prune homolog 2-like isoform X1 [Poecilia latipinna]
g16685.t1	1327.21	2.89976	1.14387e-07	217.669	289.692	270.088	264.817	280	211.196	515.489	472.967	225.776	187.73	679.381	2623.92	1040.1	270.869	408.43	419.744	641	171.53	132.819	132.161	286.351	228.205	243.538	169.306	1325.76	468.743	726.88	9123.43	1778.57	2745.86	4039.38	2916.35	CYP51A1	PREDICTED: lanosterol 14-alpha demethylase [Cyprinodon variegatus]
g16697.t1	931.122	2.1176	3.45015e-06	32.2112	21.7033	67.0747	103.343	26	40.9543	246.635	255.714	239.742	227.375	207.953	194.663	152.347	187.186	171.172	219.177	157	1244.44	1176.28	1305.62	532.297	629.66	785.041	648.699	852.778	452.403	472.794	3522.4	1872	1548.52	2465.67	2360.05	TMEM79	PREDICTED: transmembrane protein 79-like [Poecilia reticulata]
g16706.t1	99.0789	2.58643	2.63503e-10	22.4502	10.3799	16.9923	12.9179	13	5.62118	64.4361	62.3692	74.4829	55.9693	61.5784	15.2501	39.0837	80.3799	120.254	100.284	66	24.3842	21.5831	22.7284	45.6756	32.6008	36.8997	26.6841	35.385	29.6156	76.1187	69.6126	307.469	458.652	218.079	386.426	-	uncharacterized protein LOC105935097 isoform X1 [Fundulus heteroclitus]
g1676.t1	258.525	5.60198	4.14282e-10	0.976096	2.83087	0.89433	0.922707	2	0.803025	27.7742	22.8687	26.7673	36.1469	43.4077	103.163	13.5596	72.6722	60.6686	41.3541	45	0.840835	0.83012	0.841791	18.4459	1.8629	2.76748	0.92014	1.1795	1.02123	1.07209	460.836	1454.11	1209.45	1271.15	1211.15	TMEM252	transmembrane protein 252 isoform X2 [Fundulus heteroclitus]
g16762.t1	2.62939	2.83049	2.42994e-07	0.976096	0.943623	0.89433	0.922707	1	0.803025	1.11097	1.03949	2.32759	2.33206	1.00948	0.897066	0.797626	3.30328	1.08337	1.03385	2	0.840835	0.83012	0.841791	0.878378	0.93145	0.922493	0.92014	1.1795	1.02123	1.07209	1.39225	5.09618	10.5959	15.7174	7.78038	Cdcp1	CUB domain-containing protein 1-like isoform X1 [Notolabrus celidotus]
g16775.t1	87.9099	2.02211	0.0529566	1.95219	5.66174	2.68299	0.922707	6	4.01513	55.5484	41.5795	60.5174	52.4713	45.4267	81.633	133.204	50.6503	123.504	76.505	75	1.68167	1.66024	0.841791	8.78378	3.7258	4.61246	2.76042	1.1795	2.04245	1.07209	71.0049	205.546	251.275	302.561	252.862	-	PREDICTED: sperm acrosome membrane-associated protein 4-like [Cyprinodon variegatus]
g16776.t1	25.3857	2.45526	0.00106719	0.976096	0.943623	0.89433	0.922707	1	0.803025	25.5523	16.6318	13.9655	29.1507	30.2844	21.5296	7.17864	42.9427	33.5844	31.0155	27	0.840835	0.83012	3.36717	5.27027	0.93145	4.61246	1.84028	3.5385	3.06368	2.14419	34.8063	100.225	113.528	70.7284	37.6052	-	sperm acrosome membrane-associated protein 4-like [Seriola dumerili]
g16777.t1	2.98969	2.04262	0.00103713	0.976096	0.943623	0.89433	0.922707	1	0.803025	1.11097	1.03949	2.32759	2.33206	4.03793	2.6912	0.797626	7.70766	2.16674	1.03385	3	0.840835	0.83012	0.841791	1.75676	0.93145	0.922493	0.92014	1.1795	1.02123	1.07209	1.39225	13.5898	13.6233	5.89404	2.59346	-	uncharacterized protein LOC105931663 [Fundulus heteroclitus]
g16781.t1	790.372	3.46352	0.00122288	1.95219	1.88725	4.47165	0.922707	1	0.803025	126.65	293.135	249.052	666.968	539.063	880.919	1020.16	180.579	684.688	456.962	608	3.36334	5.81084	6.73433	43.0405	18.629	26.7523	15.6424	1.1795	1.02123	1.07209	956.477	1615.49	2977.45	3831.12	4430.93	-	uncharacterized protein LOC105931664 [Fundulus heteroclitus]
g16782.t1	6957.82	3.51841	0.000612695	28.3068	43.4067	27.7242	229.754	26	85.1207	5551.51	3784.77	5347.64	3849.06	4002.59	2271.37	2970.36	6588.95	6909.72	5477.35	3988	13.4534	18.2626	6.73433	522.635	46.5725	1021.2	190.469	18.872	12.2547	662.555	2155.21	31941.1	36113.9	20022	33233.9	-	sperm acrosome membrane-associated protein 4-like isoform X1 [Xiphophorus couchianus]
g16787.t1	619.565	2.39804	6.4482e-18	371.893	295.354	274.559	99.6524	447	350.119	148.87	161.12	192.026	167.908	167.574	202.737	338.991	199.298	243.758	248.124	207	748.344	337.859	589.254	296.892	287.818	532.278	265.92	204.053	3310.82	338.782	1731.96	1588.31	1472.83	2284.92	1461.41	TMEM268	transmembrane protein 268 isoform X1 [Fundulus heteroclitus]
g16793.t1	3806.02	2.05563	0.0180328	96.6335	66.9973	81.384	129.179	148	308.362	351.066	400.203	398.018	249.53	287.702	232.34	201.799	367.766	430.097	372.187	303	660.897	943.016	865.361	678.108	977.091	792.421	875.973	10918.6	7953.31	14886	4441.29	9563.83	10158.5	12014	11232.3	slc44a4	choline transporter-like protein 4 [Fundulus heteroclitus]
g168.t1	2956.59	4.96695	5.53737e-11	31.2351	46.2375	66.1804	30.4493	50	24.0908	223.305	550.928	647.07	454.751	290.731	418.033	2057.88	241.14	241.591	297.749	280	136.215	116.217	128.794	155.473	115.5	741.684	57.9688	2.359	36.7642	11.793	10437.7	10724.1	10729.1	14752.8	14834.6	CYP24A1	PREDICTED: 1,25-dihydroxyvitamin D(3) 24-hydroxylase, mitochondrial [Cyprinodon variegatus]
g1681.t1	496.218	2.97799	8.89166e-16	293.805	363.295	249.518	349.706	338	457.724	175.533	251.556	181.552	162.078	193.82	188.384	306.289	276.375	254.591	262.598	190	68.9485	100.444	79.9702	100.135	95.0079	91.3268	104.896	314.926	281.859	627.175	1048.37	1771.77	1725.62	1457.79	1911.38	Elovl7	PREDICTED: elongation of very long chain fatty acids protein 7 [Poecilia mexicana]
g16859.t1	9962.48	4.1749	0.000141309	16.5936	13.2107	13.4149	19.3769	11	12.0454	5238.21	9162.04	7578.63	9455.32	6727.18	8962.59	2751.01	3741.52	5791.68	3753.92	4866	89.1286	11.6217	11.7851	1201.62	19.5605	85.7918	159.184	8.2565	9.19104	20.3698	67687.1	25516.6	25696.6	30884.8	41910.3	-	PREDICTED: apolipoprotein A-IV-like [Cyprinodon variegatus]
g16915.t1	3.00689	3.05047	3.54105e-10	0.976096	0.943623	0.89433	0.922707	1	0.803025	2.22194	5.19744	1.1638	1.16603	2.01896	0.897066	0.797626	1.10109	2.16674	1.03385	1	0.840835	0.83012	0.841791	0.878378	0.93145	0.922493	0.92014	1.1795	1.02123	3.21628	12.5303	6.7949	6.05481	13.7528	9.07711	ZBED4	zinc finger BED domain-containing protein 4-like [Notolabrus celidotus]
g1693.t1	714.531	2.753	4.30632e-05	167.889	171.739	152.93	59.0533	100	138.923	728.795	630.969	566.768	592.342	527.959	559.769	619.756	624.321	671.688	900.485	816	84.9244	14.9422	37.8806	134.392	48.4354	191.878	136.181	33.026	42.8915	81.4792	1517.56	1960.33	1792.22	2699.47	2837.25	tspan36	PREDICTED: tetraspanin-3-like [Cyprinodon variegatus]
g16978.t1	124.594	2.62943	0.000274654	12.6893	19.8161	11.6263	35.0629	14	40.9543	162.201	97.7118	225.776	124.765	109.024	73.5594	146.763	111.211	124.587	126.13	87	17.6575	14.9422	15.1522	14.054	6.52015	23.9848	14.7222	3.5385	3.06368	8.57676	86.3197	422.983	476.816	302.561	544.627	Dbnl	drebrin-like protein A isoform X2 [Xiphophorus hellerii]
g17.t1	33.5492	3.98451	3.47783e-31	4.88048	5.66174	2.68299	4.61354	3	2.40908	9.99871	16.6318	13.9655	11.6603	8.07585	23.3237	4.78576	9.90985	9.75031	10.3385	10	5.04501	9.13132	7.57612	12.2973	9.3145	5.53496	7.36112	3.5385	2.04245	5.36047	221.368	81.5389	83.2537	137.528	107.629	PDP1	PREDICTED: pyruvate dehydrogenase [acetyl-transferring]-phosphatase 1, mitochondrial-like [Poecilia formosa]
g17017.t1	59.407	2.33318	0.00696591	4.88048	4.71812	2.68299	2.76812	4	4.81815	58.8813	60.2902	72.1553	81.622	55.5215	58.3093	86.9413	77.0766	85.5861	44.4556	50	5.88585	3.32048	3.36717	5.27027	1.8629	11.0699	0.92014	1.1795	1.02123	7.50466	33.4141	171.571	249.761	129.669	221.741	Grk5	G protein-coupled receptor kinase 6-like [Fundulus heteroclitus]
g17026.t1	856.127	5.38143	6.72228e-24	157.152	50.012	63.4974	94.1161	51	22.4847	202.196	274.425	251.38	235.538	262.465	178.516	85.346	122.221	156.005	185.059	161	24.3842	36.5253	21.0448	71.1486	31.6693	35.9772	20.2431	12.9745	18.3821	23.5861	4419.01	3363.48	3358.91	2597.31	4513.92	ogdh	2-oxoglutarate dehydrogenase, mitochondrial isoform X1 [Xiphophorus couchianus]
g17045.t1	2241.32	4.26871	5.56154e-15	1.95219	19.8161	8.04897	45.2127	11	4.81815	945.434	1193.33	1182.42	915.332	789.414	782.242	869.413	919.414	924.113	872.571	652	250.569	269.789	248.328	310.067	126.677	369.92	265	21.231	13.2759	142.589	6180.21	7056.51	8755.26	11974.7	9834.4	ocln	occludin [Fundulus heteroclitus]
g17048.t1	2365.33	3.14886	3.7643e-09	237.191	200.992	231.631	238.058	251	293.104	1645.34	1689.17	1721.25	2557.1	1682.81	3022.22	1159.75	1776.07	1652.14	1703.79	1417	315.313	213.341	267.69	425.135	220.754	337.632	311.007	462.364	372.748	319.484	11894	5159.03	4831.74	9133.79	7843.92	slc25a1b	tricarboxylate transport protein, mitochondrial [Fundulus heteroclitus]
g17081.t1	226.678	3.27742	7.24132e-14	141.534	122.671	100.165	114.416	129	143.742	107.764	103.949	118.707	94.4483	190.792	288.855	71.7864	85.8854	106.17	120.961	110	36.1559	27.394	26.9373	58.8513	34.4637	31.3647	54.2883	54.257	53.1038	54.6768	1339.35	514.714	669.057	648.344	644.475	MAT2A	PREDICTED: S-adenosylmethionine synthase-like [Poecilia reticulata]
g17082.t1	2070.46	4.28278	2.94047e-30	200.1	234.019	243.258	131.024	299	285.074	255.523	317.044	318.88	416.272	381.584	583.99	323.836	338.036	341.261	345.306	285	698.734	386.006	606.09	274.054	258.012	416.967	402.101	57.7955	1481.8	219.779	8069.5	6264.9	6452.92	11632.9	8055.29	VAMP8	vesicle-associated membrane protein 8-like [Xiphophorus maculatus]
g17089.t1	141.887	2.21624	0.0351518	0.976096	0.943623	0.89433	0.922707	2	1.60605	186.643	179.831	88.4484	146.92	114.071	159.678	63.8101	249.948	151.671	290.512	288	1.68167	2.49036	0.841791	19.3243	0.93145	1.84499	16.5625	2.359	2.04245	64.3257	721.187	426.38	227.055	398.83	77.8038	Plac8	PREDICTED: placenta-specific gene 8 protein [Poecilia mexicana]
g17104.t1	579.875	4.44934	5.62807e-34	6.83267	4.71812	8.9433	12.9179	2	4.01513	134.427	222.45	253.707	129.429	130.223	122.898	197.811	117.817	109.42	135.435	111	155.555	155.232	114.484	72.027	94.0765	118.079	100.295	8.2565	12.2547	50.3885	2371.01	2153.98	1992.03	2703.4	2323.74	F2rl1	proteinase-activated receptor 2-like [Acanthochromis polyacanthus]
g17105.t1	567.398	4.11386	1.22719e-17	0.976096	1.88725	8.9433	18.4541	1	2.40908	127.761	235.964	282.802	174.904	145.365	199.149	317.455	259.858	160.338	188.161	154	126.966	78.0313	147.313	83.4459	30.7379	104.242	50.6077	14.154	6.12736	49.3164	1328.21	1841.42	2269.04	2848.78	2612.91	F2rl1	PREDICTED: proteinase-activated receptor 2-like [Cyprinodon variegatus]
g17144.t1	564.864	2.50198	8.61829e-25	276.235	194.386	216.428	214.068	247	225.65	169.978	343.031	236.25	267.02	296.788	356.135	416.361	262.06	219.924	247.091	276	368.286	372.724	381.331	300.405	375.374	313.647	299.966	99.078	268.583	146.877	2482.39	1083.79	1139.82	1939.14	1336.93	Tnfrsf26	tumor necrosis factor receptor superfamily member 10B-like [Fundulus heteroclitus]
g17148.t1	140.692	2.91054	1.17903e-05	0.976096	0.943623	0.89433	2.76812	2	7.22723	103.32	95.6328	125.69	45.4751	72.6827	13.456	132.406	104.604	131.088	115.791	78	10.09	14.9422	20.203	20.2027	13.0403	51.6596	21.1632	23.59	9.19104	35.3791	16.707	558.881	709.927	176.821	754.697	Arid5a	PREDICTED: uncharacterized protein LOC107094650 [Cyprinodon variegatus]
g17154.t1	2228.99	2.05154	0.0798158	6.83267	6.60536	7.15464	6.45895	4	10.4393	2745.2	3151.72	2873.41	3383.81	2725.6	2675.05	510.481	4691.76	4679.07	3948.28	3040	22.7026	37.3554	5.05075	496.283	10.246	27.6748	333.091	4.718	2.04245	5.36047	4473.31	5024.83	7421.69	5986.38	4781.04	FBP1	fructose-1,6-bisphosphatase 1 [Fundulus heteroclitus]
g17188.t1	160.888	3.14925	0.000228214	542.71	476.53	426.595	418.909	368	326.831	151.092	135.133	52.3708	172.572	150.413	86.1183	64.6077	154.153	154.922	134.401	208	6.72668	0.83012	0.841791	19.3243	4.65725	7.37994	4.6007	11.795	7.14859	7.50466	1006.6	389.008	355.72	544.216	346.227	fibcd1	PREDICTED: fibrinogen C domain-containing protein 1 isoform X1 [Poecilia mexicana]
g17220.t1	390.778	2.92469	0.000606078	106.394	84.9261	86.75	100.575	81	61.8329	293.295	284.819	329.354	307.831	215.02	269.12	70.9888	489.987	474.515	455.929	464	7.56752	9.13132	2.52537	79.054	25.1492	29.5198	61.6494	8.2565	11.2335	7.50466	2308.35	798.401	823.454	1241.68	944.019	phyhd1	PREDICTED: phytanoyl-CoA dioxygenase domain-containing protein 1 isoform X2 [Poecilia reticulata]
g17234.t1	2138.2	2.51418	9.69153e-16	976.096	773.771	714.57	1006.67	743	650.45	1200.96	1191.25	1161.47	1015.61	1135.67	2153.86	1469.23	996.49	1517.8	1365.72	1175	783.659	1135.6	776.973	1438.78	1073.03	1015.66	884.254	382.158	408.491	304.475	4290.92	5525.96	5036.09	10638.7	4959.99	PTGS1	prostaglandin G/H synthase 1-like isoform X1 [Fundulus heteroclitus]
g17249.t1	314.961	2.18404	0.00219504	1417.29	1217.27	1108.97	1241.96	1236	1202.93	418.835	293.135	237.414	385.955	396.726	285.267	187.442	429.427	388.929	392.864	470	51.291	36.5253	35.3552	73.7837	13.0403	22.1398	30.3646	14.154	100.08	21.4419	1389.47	696.478	584.289	699.426	692.454	PRUNE2	protein prune homolog 2-like isoform X1 [Xiphophorus maculatus]
g17250.t1	47.4442	2.24604	0.000758541	5.85658	9.43623	9.83763	16.6087	4	5.62118	34.44	31.1846	40.7328	23.3206	36.3413	8.97066	31.9051	58.358	63.9187	44.4556	25	3.36334	7.47108	9.2597	22.8378	2.79435	23.9848	45.0869	2.359	10.2123	2.14419	26.4528	127.404	199.809	125.739	147.827	GNAQ	PREDICTED: guanine nucleotide-binding protein subunit alpha-14-like [Cyprinodon variegatus]
g17261.t1	1248.19	2.82713	6.766e-12	394.343	481.248	550.907	412.45	455	423.194	813.228	1053	1012.5	1111.22	890.363	1023.55	600.613	891.887	873.194	835.352	822	366.604	400.118	411.636	564.797	661.33	501.836	383.698	48.3595	116.42	153.31	3221.67	3552.04	4088.51	4306.58	4044.5	PLPP1	phospholipid phosphatase 1 isoform X2 [Fundulus heteroclitus]
g17265.t1	98.7158	2.26679	0.000100175	30.259	16.0416	16.0979	24.9131	12	20.8787	61.1032	124.738	98.9226	80.4559	69.6542	120.207	73.3816	105.705	86.6694	73.4035	132	22.7026	14.112	9.2597	69.3918	45.6411	47.0471	78.2119	4.718	4.08491	8.57676	224.153	225.931	260.357	335.96	263.236	Btc	probetacellulin isoform X2 [Seriola lalandi dorsalis]
g17275.t1	611.883	2.70785	7.632e-06	23.4263	55.6738	51.8711	38.7537	36	36.1361	431.055	543.652	443.406	324.156	239.247	311.282	48.6552	715.711	920.863	722.662	618	222.821	265.638	209.606	120.338	95.9394	118.079	133.42	43.6415	44.934	84.6955	4474.7	2233.83	1045.97	785.872	580.935	MRC1	PREDICTED: macrophage mannose receptor 1-like [Poecilia reticulata]
g17282.t1	442.037	3.41538	1.48756e-08	65.3985	101.911	66.1804	100.575	82	119.651	52.2155	79.001	64.0087	93.2822	52.493	79.8389	327.027	51.7514	42.2513	53.7603	42	169.849	429.172	689.427	115.067	179.77	197.413	91.0939	21.231	18.3821	24.6582	1221.01	1737.8	1554.57	1192.56	1973.62	Esm1	PREDICTED: endothelial cell-specific molecule 1-like [Poecilia formosa]
g17289.t1	8.90564	2.48414	2.55735e-05	21.4741	23.5906	37.5619	23.9904	20	8.03025	12.2206	2.07897	8.14657	6.99617	5.04741	18.8384	3.19051	6.60657	2.16674	10.3385	6	1.68167	1.66024	0.841791	0.878378	0.93145	0.922493	2.76042	7.077	3.06368	7.50466	18.0993	28.8783	9.08222	53.0463	16.8575	Grp	PREDICTED: gastrin-releasing peptide [Poecilia mexicana]
g17296.t1	829.248	4.40673	1.07903e-17	15.6175	24.5342	16.9923	9.22707	13	13.6514	187.754	344.07	428.277	225.043	234.2	113.03	325.432	378.776	417.097	264.666	306	78.1977	74.7108	58.0836	113.311	45.6411	70.1094	37.7257	29.4875	17.3609	61.1094	3850.97	2711.17	2817	4581.63	2459.9	prlr	prolactin receptor [Fundulus heteroclitus]
g17353.t1	127.758	2.14562	0.00267163	19.5219	13.2107	11.6263	7.38166	15	34.5301	61.1032	126.817	77.9743	90.9502	104.986	115.722	55.0362	48.4482	46.5848	57.8957	35	10.09	19.9229	18.5194	7.02702	9.3145	5.53496	11.9618	279.541	174.63	314.124	380.085	271.796	295.172	351.678	331.963	BSPRY	B box and SPRY domain-containing protein [Fundulus heteroclitus]
g17356.t1	29.3591	2.59898	1.29231e-19	15.6175	11.3235	27.7242	13.8406	21	10.4393	14.4426	17.6713	20.9483	27.9847	18.1707	26.0149	12.762	8.80876	10.8337	15.5078	15	4.20418	13.2819	14.3105	16.6892	23.2863	9.22493	10.1215	10.6155	20.4245	19.2977	125.303	52.6605	60.5481	111.987	75.2103	Mfap4	PREDICTED: microfibril-associated glycoprotein 4-like [Poecilia mexicana]
g17368.t1	1210.21	4.39421	1.28241e-16	87.8487	75.4899	74.2294	140.251	88	76.2874	365.508	398.124	453.88	492.064	431.049	653.961	445.873	322.621	394.346	380.457	469	95.8552	50.6373	51.3493	158.986	176.044	158.669	131.58	38.9235	16.3396	80.4071	5110.96	5014.64	4342.81	5206.4	4301.25	Tbx3	T-box transcription factor TBX3 isoform X1 [Xiphophorus couchianus]
g17389.t1	214.379	4.63921	2.25645e-54	42.9482	17.9288	25.0412	18.4541	22	20.8787	39.9948	22.8687	27.9311	24.4866	34.3224	36.7797	23.9288	39.6394	29.2509	42.3879	23	15.9759	13.2819	9.2597	44.7973	70.7902	69.1869	33.125	49.539	26.5519	28.9466	619.552	727.055	794.694	1339.91	863.622	GLIS3	PREDICTED: zinc finger protein GLIS3-like isoform X1 [Poecilia mexicana]
g17390.t1	333.185	2.0227	0.00472832	1185.96	781.32	734.245	891.335	1081	737.177	352.177	349.268	320.044	317.16	358.366	532.857	610.982	308.306	401.929	328.765	411	26.9067	44.8265	77.4448	55.3378	48.4354	140.219	63.4897	11.795	14.2972	11.793	907.749	720.26	844.646	945.011	676.893	Unc5c	PREDICTED: netrin receptor UNC5C isoform X2 [Cyprinodon variegatus]
g17398.t1	283.886	2.18583	8.34901e-29	323.088	394.435	334.479	410.605	381	475.391	181.088	227.648	205.992	192.395	128.204	215.296	131.608	205.905	205.84	201.601	169	138.738	93.8035	142.263	216.081	187.222	165.126	188.629	87.283	230.797	144.733	620.945	621.734	746.256	933.222	753.4	gltp	glycolipid transfer protein-like [Xiphophorus maculatus]
g17411.t1	1746.06	4.8296	1.12733e-06	0.976096	2.83087	8.04897	2.76812	4	3.2121	461.052	544.691	513.234	461.747	514.836	643.196	51.8457	600.096	666.271	649.259	772	6.72668	1.66024	3.36717	106.284	4.65725	26.7523	31.2848	5.8975	2.04245	5.36047	8460.72	5520.86	5140.54	8173.06	8570.09	SUSD2	sushi domain-containing protein 2 [Fundulus heteroclitus]
g17434.t1	5.33241	3.8329	4.06435e-18	0.976096	2.83087	0.89433	0.922707	2	0.803025	3.3329	1.03949	1.1638	4.66411	1.00948	2.6912	0.797626	1.10109	3.2501	3.10155	1	0.840835	0.83012	0.841791	0.878378	0.93145	0.922493	0.92014	2.359	2.04245	1.07209	33.4141	13.5898	9.08222	27.5055	14.264	-	PREDICTED: uncharacterized protein LOC106536944 [Austrofundulus limnaeus]
g17435.t1	10.5831	2.99009	7.59802e-07	2.92829	0.943623	0.89433	0.922707	6	0.803025	1.11097	7.27641	4.65518	1.16603	3.02844	20.6325	4.78576	1.10109	6.50021	4.13541	1	0.840835	1.66024	0.841791	0.878378	0.93145	0.922493	1.84028	14.154	3.06368	4.28838	26.4528	23.7822	37.8426	29.4702	50.5725	-	uncharacterized protein LOC116721966 [Xiphophorus hellerii]
g17437.t1	2026.44	5.56324	2.00791e-11	0.976096	0.943623	1.78866	1.84541	3	0.803025	271.076	425.15	215.302	295.005	472.437	880.919	157.132	353.451	305.51	298.783	289	81.561	17.4325	13.4687	66.7567	17.6976	23.0623	63.4897	2.359	4.08491	2.14419	11331.5	8347.54	5979.13	9169.16	8793.13	Ggt1	gamma-glutamyltranspeptidase 1-like [Fundulus heteroclitus]
g17444.t1	24.293	3.41366	4.03124e-22	3.90439	3.77449	1.78866	9.22707	1	4.81815	2.22194	1.03949	1.1638	4.66411	3.02844	17.9413	6.38101	4.40438	6.50021	7.23696	3	5.04501	4.98072	9.2597	6.14864	3.7258	6.45745	5.52084	15.3335	21.4458	10.7209	71.0049	62.8529	59.0344	143.422	84.2874	-	-
g17445.t1	4920.37	2.64544	2.32148e-16	482.192	351.972	404.237	361.701	437	570.951	2353.03	2037.39	2666.25	2082.53	1931.14	2434.64	2801.26	1831.12	2194.9	2125.6	1966	3113.61	2458.81	2714.78	3845.54	3735.12	3534.99	3640.99	568.519	1280.62	444.919	13676.1	11928.5	11378.5	19456.2	15940.7	ANXA4	PREDICTED: annexin A4 [Cyprinodon variegatus]
g17478.t1	439.454	2.15264	0.00112878	19.5219	272.707	187.809	51.6716	217	338.877	328.846	1036.37	586.553	626.157	751.054	261.943	407.587	436.033	484.265	592.397	623	30.2701	184.287	230.651	124.73	65.2015	70.1094	70.8508	7.077	54.125	129.723	710.049	727.055	989.962	1455.83	1741.51	nt5c2	PREDICTED: cytosolic purine 5'-nucleotidase-like isoform X1 [Poecilia mexicana]
g17482.t1	4.83549	2.5792	2.21325e-08	1.95219	13.2107	2.68299	3.69083	2	5.62118	1.11097	2.07897	2.32759	1.16603	4.03793	4.48533	1.59525	4.40438	2.16674	4.13541	3	0.840835	1.66024	2.52537	1.75676	0.93145	2.76748	0.92014	4.718	1.02123	1.07209	6.96126	27.1796	19.6781	5.89404	10.3738	Slc5a1	sodium/glucose cotransporter 1-like [Fundulus heteroclitus]
g17483.t1	14954.4	6.22415	4.39693e-17	20.498	46.2375	34.8789	53.517	59	93.1509	978.763	1396.03	749.484	1244.15	1393.08	1921.52	465.814	647.444	874.278	850.86	1088	86.606	48.9771	10.9433	396.148	47.504	217.708	274.202	2415.62	1109.05	4224.05	72912.3	55208.6	48732.2	88190.5	65446	Slc5a1	sodium/glucose cotransporter 1-like [Fundulus heteroclitus]
g17486.t1	90.1514	4.16883	9.72713e-10	6.83267	16.0416	22.3582	15.686	34	32.924	37.7729	20.7897	38.4052	52.4713	24.2276	17.9413	31.1074	17.6175	23.8341	18.6093	14	1.68167	1.66024	0.841791	4.39189	0.93145	3.68997	1.84028	76.6675	38.8066	63.2536	286.804	327.854	298.199	416.512	412.36	-	serine/threonine-protein kinase phg2-like isoform X2 [Xiphophorus couchianus]
g17490.t1	265.009	5.60949	7.70471e-13	4.88048	4.71812	5.36598	6.45895	3	2.40908	33.329	50.9349	50.0432	62.9655	47.4456	51.1328	6.38101	55.0547	72.5856	58.9295	74	3.36334	1.66024	2.52537	20.2027	2.79435	6.45745	1.84028	2.359	1.02123	1.07209	1265.56	935.998	753.824	1646.4	1113.89	LEAP2	liver-expressed antimicrobial peptide 2-like [Xiphophorus maculatus]
g17494.t1	3803.74	2.50398	1.66466e-22	3286.52	3947.18	3678.38	3117.83	3024	2984.84	3211.81	3153.8	2741.9	2588.58	3549.34	3325.42	2567.56	2051.34	2298.91	2469.87	2753	1679.99	1475.12	1612.87	1379.05	1245.35	1028.58	1387.57	1610.02	1592.09	1604.93	16438.3	9747.29	7427.74	10157.4	10071.7	NNT	PREDICTED: NAD(P) transhydrogenase, mitochondrial [Cyprinodon variegatus]
g17497.t1	1531.79	2.42772	2.96135e-18	785.758	828.501	805.791	902.408	930	1014.22	833.226	751.549	712.243	940.985	673.324	741.874	439.492	746.542	954.447	783.66	869	491.889	493.091	548.848	533.175	560.733	538.736	476.632	2208.02	1015.1	1165.37	3898.31	4209.44	3401.29	4734.88	5044.28	Atp5me	PREDICTED: ATP synthase subunit e, mitochondrial [Cyprinodon variegatus]
g17507.t1	785.762	2.78116	2.16511e-37	499.761	557.681	482.938	466.89	636	570.951	501.046	444.9	480.647	489.732	397.736	471.857	246.467	481.178	538.434	544.84	534	231.23	259.827	237.385	336.419	318.556	354.237	330.33	184.002	301.262	328.061	1978.39	2026.58	2116.16	3060.97	2773.71	PLGRKT	PREDICTED: plasminogen receptor (KT) [Poecilia mexicana]
g17528.t1	315.389	2.8857	0.00948405	1.95219	0.943623	0.89433	0.922707	1	0.803025	207.751	245.319	215.302	278.681	175.65	196.457	35.8932	316.014	317.427	461.098	398	1.68167	0.83012	0.841791	24.5946	1.8629	2.76748	26.6841	1.1795	1.02123	1.07209	849.274	502.823	1165.55	1280.97	1107.41	-	protein AMBP isoform X1 [Fundulus heteroclitus]
g17533.t1	2060.73	4.47259	5.74213e-36	156.175	225.526	188.704	142.097	182	211.999	393.283	498.954	389.871	587.678	437.105	728.418	220.145	581.378	592.602	608.939	578	260.659	258.997	263.481	462.905	468.52	364.385	397.5	67.2315	125.611	187.617	8831.06	7326.61	5440.25	11685.9	7811.5	AK3	PREDICTED: GTP:AMP phosphotransferase AK3, mitochondrial [Cyprinodon variegatus]
g17541.t1	470.576	3.29775	0.000654011	0.976096	5.66174	1.78866	7.38166	2	6.4242	363.286	294.175	352.63	355.639	282.655	238.62	319.848	528.525	476.682	487.978	328	5.04501	3.32048	6.73433	33.3784	0.93145	52.5821	13.8021	3.5385	2.04245	13.9372	243.644	1885.59	1972.35	1477.44	2443.04	CLIC4	PREDICTED: chloride intracellular channel protein 4-like [Cyprinodon variegatus]
g17573.t1	206.141	2.40236	3.62296e-06	6.83267	1.88725	11.6263	21.2223	2	0.803025	33.329	40.54	9.31036	58.3014	37.3508	68.177	39.8813	88.0876	89.9195	111.656	78	166.485	143.611	157.415	159.865	176.976	256.453	240.157	14.154	7.14859	18.2256	265.92	516.413	765.934	673.885	627.617	STX2	PREDICTED: syntaxin-2-like isoform X1 [Cyprinodon variegatus]
g17580.t1	550.799	3.46781	6.6185e-06	4.88048	5.66174	4.47165	29.5266	7	8.83328	575.481	430.348	508.579	448.921	355.337	257.458	307.086	414.012	492.932	378.39	310	17.6575	36.5253	20.203	62.3648	6.52015	61.807	17.4827	21.231	7.14859	19.2977	345.279	2413.89	2452.2	1577.64	2893	Cldn23	claudin-23-like [Fundulus heteroclitus]
g17586.t1	210.224	3.65848	3.37116e-06	119.084	129.276	172.606	99.6524	118	94.757	91.0994	115.383	126.854	78.1239	99.9387	191.075	51.0481	159.659	170.089	136.468	137	11.7717	4.1506	8.41791	25.473	5.5887	5.53496	10.1215	1.1795	7.14859	4.28838	1048.37	738.946	538.878	890	573.155	SLC26A2	sulfate anion transporter 1-like isoform X1 [Fundulus heteroclitus]
g17623.t1	984.541	3.94454	6.3591e-13	9.76096	4.71812	9.83763	35.0629	8	8.03025	385.506	378.373	496.941	357.971	309.911	272.708	241.681	617.714	489.682	570.686	437	127.807	58.9385	97.6478	198.513	320.419	170.661	192.309	24.7695	10.2123	26.8024	1839.17	3419.54	4000.72	4732.91	4541.15	Rassf6	ras association domain-containing protein 6-like isoform X2 [Xiphophorus hellerii]
g17628.t1	291.822	3.28889	2.99485e-05	0.976096	0.943623	2.68299	1.84541	3	4.01513	99.9871	203.739	110.561	181.9	190.792	240.414	78.1674	270.869	308.76	242.955	228	4.20418	27.394	3.36717	77.2972	5.5887	17.5274	54.2883	4.718	5.10613	17.1535	1422.88	1003.95	1000.56	721.037	792.302	ATP8B2	phospholipid-transporting ATPase ID-like [Fundulus heteroclitus]
g17642.t1	191.752	2.88455	9.12222e-12	52.7092	51.8993	24.1469	35.9856	27	44.9694	71.1019	79.001	60.5174	83.954	70.6637	282.576	35.8932	70.47	149.505	141.638	145	40.3601	40.6759	46.2985	55.3378	52.1612	46.1246	46.9271	100.257	54.125	61.1094	1123.55	246.315	384.481	703.355	510.912	maoA	probable flavin-containing monoamine oxidase A [Xiphophorus hellerii]
g17646.t1	496.907	2.35889	4.72206e-12	142.51	124.558	156.508	129.179	107	77.8934	114.43	203.739	119.871	106.109	125.176	215.296	142.775	195.995	218.84	180.924	180	374.172	430.832	374.597	153.716	489.011	288.74	405.782	174.566	89.8679	127.579	1346.31	1121.16	1362.33	1809.47	1129.45	Igsf9	protein turtle homolog A-like [Fundulus heteroclitus]
g17675.t1	735.344	3.62858	5.49673e-07	115.179	82.0952	108.214	119.029	128	87.5297	413.28	669.43	471.337	352.14	474.456	410.856	551.957	469.066	537.35	400.101	496	34.4743	33.2048	46.2985	68.5135	25.1492	117.157	50.6077	12.9745	6.12736	17.1535	1699.94	2571.87	2912.36	2858.61	3183.47	col2a1	collagen alpha-1(I) chain-like [Fundulus heteroclitus]
g17690.t1	816.953	2.11367	2.53513e-05	56.6136	33.0268	72.4407	114.416	73	65.8481	792.12	775.457	816.984	704.281	809.604	963.449	616.565	521.919	580.685	607.905	425	34.4743	365.253	239.069	126.486	209.576	154.056	79.132	1278.58	605.587	727.952	2159.38	1489.78	1774.06	3035.43	1867.29	MAMDC2	PREDICTED: MAM domain-containing protein 2 isoform X1 [Poecilia mexicana]
g17700.t1	1834.35	5.45973	2.56576e-11	31.2351	10.3799	15.2036	33.2175	12	7.22723	245.524	518.704	222.285	355.639	365.432	680.873	177.871	382.08	456.098	421.811	435	11.7717	5.81084	5.89254	107.162	15.8347	28.5973	34.9653	14.154	10.2123	52.5326	9002.3	6669.2	6465.03	9740.88	7400.44	ATP8B2	phospholipid-transporting ATPase ID-like [Fundulus heteroclitus]
g17711.t1	838.991	6.00348	2.61839e-22	11.7132	8.49261	16.9923	9.22707	18	4.01513	72.2129	101.87	87.2846	90.9502	84.7964	101.368	50.2505	114.514	157.088	102.351	107	12.6125	12.4518	13.4687	90.4729	6.52015	21.2173	124.219	5.8975	3.06368	10.7209	3213.32	3789.86	3401.29	4119.93	3916.12	-	PREDICTED: mucin-5AC-like [Cyprinodon variegatus]
g17727.t1	1151.49	2.09789	5.40534e-06	520.259	421.8	406.92	559.161	604	601.466	473.272	643.442	836.769	569.022	438.115	509.534	684.363	356.755	330.427	346.34	315	543.18	757.069	912.502	270.54	299.927	336.71	297.205	1896.64	2270.19	1539.53	2762.23	2439.37	1519.76	3968.65	3800.72	CCNG2	cyclin-G2 [Fundulus heteroclitus]
g17738.t1	1343.23	3.09599	2.66469e-39	58.5658	47.1812	69.7577	110.725	37	57.8178	467.717	779.615	556.294	434.928	514.836	512.225	428.325	389.787	504.849	354.611	393	511.228	476.489	446.991	540.202	595.197	395.749	433.386	1252.63	518.783	928.434	5092.86	4008.99	4816.6	3811.48	4174.17	-	myosin-9-like isoform X2 [Xiphophorus hellerii]
g17740.t1	1413.67	2.39686	1.51986e-05	11.7132	5.66174	66.1804	103.343	10	6.4242	696.577	802.484	869.355	601.67	681.4	656.652	787.257	531.829	724.773	582.058	405	1341.97	1368.87	1179.35	891.553	1224.86	1141.12	1211.82	40.103	13.2759	84.6955	3483.42	4455.76	4094.57	3314.41	4158.61	atp8b1	phospholipid-transporting ATPase IC [Fundulus heteroclitus]
g17763.t1	5.13661	2.84423	1.57797e-13	1.95219	5.66174	3.57732	1.84541	4	4.01513	6.66581	1.03949	1.1638	3.49808	1.00948	0.897066	3.98813	2.20219	3.2501	3.10155	3	1.68167	1.66024	2.52537	2.63513	2.79435	0.922493	1.84028	1.1795	2.04245	4.28838	11.138	22.0834	12.1096	17.6821	16.8575	NAIF1	nuclear apoptosis-inducing factor 1 [Xiphophorus maculatus]
g17764.t1	46.435	3.27938	5.13785e-09	24.4024	16.0416	21.4639	26.7585	5	19.2726	36.6619	54.0533	40.7328	27.9847	32.3034	33.1914	28.7146	33.0328	40.0846	26.8801	20	4.20418	4.98072	2.52537	7.9054	0.93145	7.37994	2.76042	5.8975	7.14859	9.64885	233.898	180.065	92.3359	127.704	150.421	FAM102A	PREDICTED: protein FAM102A [Cyprinodon variegatus]
g17774.t1	637.919	3.82031	4.27135e-38	199.124	150.98	134.149	142.097	115	183.09	272.187	218.292	239.742	244.866	301.835	447.636	185.847	151.951	161.422	197.466	162	206.846	193.418	149.839	111.554	130.403	122.692	101.215	68.411	119.484	58.9652	3224.46	1899.18	1633.29	2670	2335.41	thnsl2	threonine synthase-like 2 isoform X1 [Fundulus heteroclitus]
g17790.t1	45.2045	3.60955	1.10942e-06	0.976096	2.83087	8.04897	8.30436	2	1.60605	1.11097	4.15795	3.49139	1.16603	14.1327	0.897066	2.39288	6.60657	13.0004	7.23696	3	0.840835	4.1506	2.52537	2.63513	2.79435	6.45745	3.68056	74.3085	34.7217	55.7489	189.346	71.3465	89.3085	204.327	250.269	-	uncharacterized protein LOC108249697 [Kryptolebias marmoratus]
g17793.t1	32.3161	5.90073	7.50215e-37	0.976096	0.943623	0.89433	0.922707	1	0.803025	2.22194	2.07897	1.1638	4.66411	5.04741	0.897066	0.797626	5.50547	6.50021	2.0677	2	0.840835	0.83012	0.841791	2.63513	1.8629	4.61246	0.92014	1.1795	1.02123	1.07209	38.9831	144.392	113.528	111.987	298.248	-	PREDICTED: uncharacterized protein LOC107093941 [Cyprinodon variegatus]
g17810.t1	944.736	2.93316	6.83118e-18	86.8726	53.7865	104.637	121.797	72	44.1664	353.288	418.913	339.828	410.442	422.973	339.091	331.015	257.656	313.093	243.989	258	839.154	807.707	760.138	301.284	383.758	369.92	438.907	181.643	85.783	173.679	4231.06	2565.08	2503.66	3043.29	2519.55	MYO5B	PREDICTED: unconventional myosin-Vb isoform X1 [Cyprinodon variegatus]
g17843.t1	57.7942	2.4102	1.63482e-07	14.6414	13.2107	7.15464	22.145	6	12.8484	73.3239	75.8826	76.8105	74.6258	65.6163	46.6474	59.822	52.8525	48.7516	40.3202	26	12.6125	14.112	9.2597	10.5405	11.1774	16.6049	5.52084	27.1285	27.5731	34.307	50.1211	185.161	207.377	108.057	250.269	-	uncharacterized protein si:ch211-202f5.3 [Danio rerio]
g17845.t1	1093.31	2.96102	9.35219e-13	253.785	299.129	293.34	249.131	228	216.014	567.705	971.92	509.742	563.191	677.362	1882.94	684.363	393.091	430.097	442.489	655	306.064	288.882	332.508	336.419	270.121	256.453	333.091	196.976	193.012	123.291	6040.98	1878.79	2349.27	4021.7	2955.25	Pisd	PREDICTED: phosphatidylserine decarboxylase proenzyme isoform X1 [Cyprinodon variegatus]
g17847.t1	2020.36	3.03009	0.00283155	1.95219	1.88725	8.04897	1.84541	6	3.2121	1000.98	967.762	992.717	622.659	764.177	1224.5	268.8	2571.06	3147.18	2937.17	2554	30.2701	14.9422	17.6776	169.527	24.2177	8.30243	226.354	55.4365	26.5519	65.3978	15680.9	7710.52	3551.15	4897.94	590.012	CUBN	cubilin isoform X1 [Xiphophorus couchianus]
g17897.t1	85.4515	3.35712	6.0978e-05	2.92829	3.77449	0.89433	8.30436	8	4.01513	89.9884	45.7374	123.362	89.7842	54.512	50.2357	60.6196	58.358	81.2526	64.0988	34	0.840835	0.83012	0.841791	8.78378	1.8629	11.0699	2.76042	1.1795	2.04245	19.2977	65.4359	283.687	392.049	200.397	527.769	DTX3L	E3 ubiquitin-protein ligase DTX3L-like [Xiphophorus hellerii]
g17899.t1	839.397	2.90872	1.59668e-14	312.351	313.283	270.982	347.861	259	304.347	325.514	302.491	342.156	325.322	215.02	221.575	293.527	529.626	443.097	506.587	352	380.058	241.565	244.961	600.81	760.063	583.938	540.122	84.924	87.8255	114.714	1268.34	2427.48	2894.2	2734.83	3851.29	F3	tissue factor [Fundulus heteroclitus]
g179.t1	10844.6	6.8415	1.29024e-17	3.90439	2.83087	3.57732	0.922707	1	4.81815	805.452	1061.32	736.682	1282.63	1299.2	1225.39	204.192	781.777	882.945	852.928	1119	80.7202	14.9422	7.57612	348.716	20.4919	143.909	207.952	27.1285	24.5094	66.4699	57981.7	43990.2	38841.6	49148.4	53599	slc5a8	sodium-coupled monocarboxylate transporter 1-like [Xiphophorus couchianus]
g17922.t1	10.0433	2.92688	3.56495e-07	3.90439	0.943623	0.89433	0.922707	1	1.60605	8.88774	9.35538	22.1121	8.1622	8.07585	5.3824	17.5478	6.60657	4.33347	5.16926	2	0.840835	1.66024	1.68358	3.51351	0.93145	2.76748	0.92014	1.1795	1.02123	1.07209	9.74577	28.8783	46.9248	27.5055	45.3855	CCR3	PREDICTED: C-C chemokine receptor type 1-like [Nothobranchius furzeri]
g17928.t1	692.418	4.14432	1.42322e-24	49.7809	24.5342	41.1392	30.4493	48	58.6208	122.206	179.831	126.854	113.105	118.109	97.7802	96.5128	183.883	218.84	223.312	231	106.786	87.9927	88.3881	284.594	200.262	173.429	347.813	11.795	175.651	58.9652	2638.32	1771.77	1718.05	4785.96	2404.14	-	PREDICTED: leucine-rich repeat-containing protein 19 isoform X1 [Poecilia formosa]
g17949.t1	1.83181	2.45763	4.90503e-05	0.976096	0.943623	0.89433	0.922707	1	0.803025	1.11097	3.11846	1.1638	1.16603	1.00948	0.897066	0.797626	1.10109	1.08337	1.03385	1	0.840835	0.83012	0.841791	0.878378	0.93145	0.922493	0.92014	1.1795	1.02123	1.07209	2.7845	3.39745	6.05481	3.92936	9.07711	EFHD1	EF-hand domain-containing protein D1-like [Sparus aurata]
g17951.t1	1143.97	2.85567	3.17074e-26	99.5618	169.852	187.809	154.092	121	162.211	511.045	649.679	437.587	669.3	664.239	984.979	737.007	307.205	308.76	319.46	335	544.861	709.752	763.505	344.324	398.661	368.997	271.441	721.854	415.639	517.822	5181.96	3253.06	2939.61	3599.29	2715.35	BAMBI	BMP and activin membrane-bound inhibitor homolog [Oreochromis niloticus]
g17978.t1	437.085	2.19182	3.9738e-10	510.498	479.361	438.222	428.136	473	285.074	224.415	302.491	223.449	207.553	236.219	193.766	208.978	142.041	139.754	150.942	170	517.955	483.96	447.833	241.554	270.121	238.926	263.16	189.899	171.566	155.454	2920.95	696.478	490.44	864.459	653.552	wdr37	PREDICTED: WD repeat-containing protein 37-like isoform X4 [Poecilia formosa]
g18006.t1	455.342	2.66411	5.21221e-05	34.1634	85.8697	108.214	39.6764	63	77.0904	388.839	300.412	374.742	444.257	338.176	61.0005	236.895	598.995	481.015	522.095	426	83.2427	63.0891	56.4	182.703	82.8991	109.777	90.1737	18.872	11.2335	13.9372	1221.01	998.851	781.071	1709.27	2012.52	ABCA4	retinal-specific phospholipid-transporting ATPase ABCA4-like isoform X1 [Xiphophorus hellerii]
g18014.t1	399.703	2.14094	2.98134e-16	382.63	328.381	306.755	287.885	342	313.983	143.315	185.029	172.242	144.587	130.223	163.266	236.097	181.681	214.507	158.179	143	218.617	141.95	195.296	292.5	258.943	233.391	247.518	343.234	524.91	433.126	1243.28	803.498	962.715	1072.71	1011.45	VAV3	PREDICTED: guanine nucleotide exchange factor VAV3 isoform X1 [Poecilia reticulata]
g1805.t1	422.86	2.65633	1.13522e-20	192.291	177.401	191.387	151.324	147	126.878	207.751	254.674	180.388	211.051	244.295	363.312	407.587	266.465	224.257	190.229	239	116.876	104.595	97.6478	173.919	258.943	182.654	145.382	226.464	105.186	179.04	1836.38	1066.8	1011.15	1302.58	1011.45	LIMK2	LIM domain kinase 2 [Xiphophorus maculatus]
g18058.t1	472.519	2.22599	8.11939e-09	22.4502	22.647	26.8299	31.372	47	20.8787	189.975	190.226	178.061	174.904	170.602	392.915	321.443	153.052	158.172	142.672	168	154.714	195.078	145.63	261.757	303.653	159.591	184.948	767.854	410.533	695.789	1809.93	1010.74	1167.06	1176.84	1012.75	Bmp6	LOW QUALITY PROTEIN: bone morphogenetic protein 6-like [Xiphophorus hellerii]
g1806.t1	109.283	4.92034	1.06281e-09	41.9721	49.0684	36.6675	56.2851	55	57.8178	9.99871	21.8292	20.9483	10.4943	15.1422	18.8384	9.57152	16.5164	15.1671	20.677	13	10.09	0.83012	0.841791	3.51351	0.93145	2.76748	5.52084	1.1795	1.02123	1.07209	637.652	338.047	254.302	422.406	604.276	ine	sodium- and chloride-dependent GABA transporter ine-like [Fundulus heteroclitus]
g18082.t1	967.131	2.76084	7.33642e-17	222.55	253.835	355.049	252.822	228	252.953	677.69	551.968	536.51	735.764	772.253	1222.7	512.874	323.722	338.011	445.59	486	459.096	346.16	452.884	343.446	353.951	357.927	414.063	202.874	311.474	358.08	6425.25	1657.96	1495.54	2681.79	2287.43	DAP	death-associated protein 1 [Xiphophorus maculatus]
g18087.t1	482.024	2.84658	1.44607e-06	887.272	735.083	690.423	742.779	719	657.678	369.952	328.478	313.061	408.11	454.267	495.18	310.277	439.337	413.847	428.015	486	59.6993	43.9963	42.9314	111.554	62.4072	51.6596	60.7292	37.744	41.8703	57.8931	1880.93	1270.65	1360.82	1654.26	1272.09	amer2	PREDICTED: APC membrane recruitment protein 2 [Poecilia latipinna]
g18088.t1	296.518	3.89076	1.10605e-36	26.3546	25.4778	33.0902	23.0677	21	18.4696	75.5458	73.8036	45.388	64.1315	42.3982	49.3386	79.7626	129.929	95.3364	102.351	71	74.8344	51.4674	72.394	121.216	82.8991	91.3268	125.139	10.6155	74.5495	20.3698	1070.64	949.588	1111.06	1172.91	1226.71	B4GALT1	PREDICTED: beta-1,4-galactosyltransferase 1-like [Cyprinodon variegatus]
g18091.t1	344.993	4.39718	6.56646e-07	3.90439	0.943623	1.78866	2.76812	3	0.803025	66.6581	116.423	73.3191	57.1354	111.043	186.59	31.9051	178.377	195.006	174.721	211	1.68167	3.32048	4.20896	26.3513	3.7258	7.37994	7.36112	3.5385	3.06368	8.57676	2223.43	650.612	663.002	2341.9	918.085	hnf4a	hepatocyte nuclear factor 4-gamma isoform X1 [Fundulus heteroclitus]
g18099.t1	190.253	2.04585	3.07696e-16	109.323	75.4899	87.6443	71.9712	87	94.757	108.875	108.107	123.362	101.444	77.7301	206.325	72.584	101.301	107.253	98.2159	107	96.6961	71.3903	77.4448	92.2297	119.226	89.4818	120.538	159.232	189.948	227.284	615.376	417.887	346.638	467.594	504.428	TPK1	thiamin pyrophosphokinase 1 isoform X1 [Xiphophorus hellerii]
g18116.t1	1107.69	2.03346	1.2809e-06	804.303	1052.14	854.979	740.011	726	865.661	611.032	508.309	549.311	617.995	488.589	533.754	226.526	419.517	432.264	457.996	407	1469.78	1348.11	1331.71	604.324	447.096	779.506	523.56	501.287	303.304	281.961	6240.08	1561.13	1403.2	2180.79	2184.99	OPLAH	PREDICTED: 5-oxoprolinase [Poecilia mexicana]
g1816.t1	407.406	2.94554	1.34944e-06	158.128	138.713	98.3763	152.247	138	146.954	136.649	135.133	138.492	131.761	153.441	164.163	37.4884	171.771	166.839	185.059	158	279.157	336.199	345.134	159.865	144.375	226.933	155.504	9.436	9.19104	4.28838	3044.86	574.169	414.755	1542.27	810.456	DAO	D-amino-acid oxidase [Xiphophorus maculatus]
g18173.t1	246.882	3.46274	3.64526e-08	40.996	23.5906	25.9356	21.2223	29	45.7724	179.977	112.265	131.509	141.089	190.792	316.664	149.954	99.0985	118.087	128.198	157	7.56752	22.4132	6.73433	21.0811	19.5605	42.4347	16.5625	48.3595	14.2972	20.3698	714.226	730.452	897.626	970.551	1002.37	CPA6	carboxypeptidase A6 [Fundulus heteroclitus]
g18181.t1	876.626	2.79102	7.34875e-15	46.8526	25.4778	57.2371	49.8262	50	44.9694	226.637	610.179	495.777	364.967	411.868	452.121	232.109	268.667	263.258	229.515	216	829.905	699.791	775.29	487.5	611.031	474.161	474.792	126.206	180.757	97.5606	3731.24	2065.65	2294.77	2890.04	2360.05	GRAMD1C	PREDICTED: GRAM domain-containing protein 1C [Poecilia mexicana]
g18199.t1	82.874	5.0555	2.00432e-23	0.976096	0.943623	0.89433	0.922707	1	0.803025	4.44387	11.4344	8.14657	15.1584	11.1043	45.7504	10.3691	4.40438	6.50021	6.20311	4	11.7717	5.81084	5.89254	5.27027	8.38305	14.7599	27.6042	1.1795	1.02123	3.21628	466.405	298.976	286.09	512.781	168.575	pdx1	pancreas/duodenum homeobox protein 1 [Xiphophorus hellerii]
g18200.t1	81.2882	3.50858	2.82363e-06	52.7092	50.9557	43.8222	25.8358	46	56.2118	69.991	43.6585	54.6984	76.9578	61.5784	82.5301	24.7264	41.8416	63.9187	46.5233	41	2.52251	2.49036	2.52537	10.5405	6.52015	5.53496	12.882	2.359	1.02123	1.07209	555.509	200.45	217.973	320.243	130.97	urad	putative 2-oxo-4-hydroxy-4-carboxy-5-ureidoimidazoline decarboxylase [Fundulus heteroclitus]
g18210.t1	1897.12	2.3119	1.61881e-15	1675.96	1987.27	1929.07	1615.66	1677	1695.99	621.031	852.379	721.553	773.077	744.997	761.609	736.209	650.747	696.606	725.764	751	1592.54	1756.53	1942.85	1282.43	1374.82	1310.86	1568.84	503.646	799.62	473.866	8379.97	3699.83	3705.54	5874.39	3754.03	Ythdf3	PREDICTED: YTH domain-containing family protein 3 isoform X2 [Cyprinodon variegatus]
g18237.t1	145.015	4.13295	5.56538e-10	0.976096	0.943623	2.68299	1.84541	2	2.40908	17.7755	42.619	22.1121	26.8186	54.512	23.3237	5.58339	71.5711	68.2522	73.4035	41	2.52251	1.66024	4.20896	20.2027	7.4516	3.68997	7.36112	57.7955	40.8491	84.6955	135.048	976.768	731.119	255.408	713.201	-	uncharacterized protein LOC105938417 [Fundulus heteroclitus]
g18249.t1	6275.65	5.19643	4.4477e-09	66.3745	50.9557	53.6598	47.0581	15	36.9392	1274.28	1831.58	1164.96	1259.31	1581.86	3261.73	383.658	1516.21	2065.98	1638.65	1423	50.4501	46.4867	46.2985	476.081	32.6008	124.537	165.625	12.9745	5.10613	55.7489	32378.2	20143.5	24627.9	26758.9	28333.5	VIL1	villin-like protein [Fundulus heteroclitus]
g18257.t1	70.4219	3.28399	0.00011221	1.95219	1.88725	0.89433	0.922707	5	0.803025	34.44	45.7374	23.2759	46.6411	44.4172	91.5007	7.97626	51.7514	62.8353	56.8618	63	2.52251	1.66024	0.841791	6.14864	0.93145	0.922493	4.6007	3.5385	2.04245	3.21628	279.843	214.04	243.706	168.962	283.984	SLC22A13	solute carrier family 22 member 13 [Fundulus heteroclitus]
g18258.t1	369.862	4.39195	2.32747e-06	1.95219	0.943623	0.89433	1.84541	1	0.803025	81.1006	126.817	101.25	100.278	110.033	139.045	44.6671	195.995	212.34	205.736	228	3.36334	0.83012	1.68358	18.4459	1.8629	14.7599	5.52084	1.1795	6.12736	1.07209	1928.27	1245.17	1082.3	1848.76	1204.66	xirp1	xin actin-binding repeat-containing protein 1-like isoform X1 [Xiphophorus maculatus]
g1826.t1	23.2442	2.80034	1.35065e-05	4.88048	21.7033	9.83763	23.0677	9	27.3029	5.55484	3.11846	2.32759	9.32822	9.08533	5.3824	23.1312	4.40438	10.8337	10.3385	3	9.24919	8.3012	35.3552	0.878378	15.8347	0.922493	1.84028	25.949	9.19104	11.793	108.596	8.49363	54.4933	31.4349	149.124	UBB	polyubiquitin-like [Xiphophorus couchianus]
g18277.t1	482.761	2.57526	4.24492e-05	59.5419	77.3771	85.8557	62.7441	90	132.499	269.965	304.57	289.785	213.383	303.854	400.091	1141.4	205.905	237.258	279.14	307	139.579	81.3517	100.173	209.054	122.02	444.641	174.827	14.154	17.3609	21.4419	588.923	1046.42	1389.58	2432.27	1528.84	PCOLCE2	procollagen C-endopeptidase enhancer 2 [Echeneis naucrates]
g18279.t1	666.504	2.45782	3.38353e-69	295.757	186.837	191.387	279.58	154	195.135	412.169	356.544	401.509	486.234	415.906	515.813	306.289	349.047	357.511	386.661	271	376.694	300.503	292.943	280.202	293.407	287.818	284.323	422.261	271.646	352.719	2293.04	1501.67	1599.98	1982.36	1941.2	ACAD11	PREDICTED: acyl-CoA dehydrogenase family member 11 isoform X1 [Cyprinodon variegatus]
g18280.t1	194.161	2.42829	5.98713e-16	170.817	217.977	160.979	181.773	162	155.787	103.32	134.094	148.966	93.2822	133.252	122.898	299.908	111.211	104.003	98.2159	89	63.9035	55.618	79.9702	62.3648	57.7499	61.807	54.2883	95.5395	82.7194	161.886	413.499	535.099	611.536	444.017	696.344	ACKR4	PREDICTED: atypical chemokine receptor 4 [Poecilia reticulata]
g18294.t1	1015.24	4.65236	1.49077e-07	274.283	347.253	230.737	337.711	304	432.028	356.621	347.189	235.087	376.627	541.082	822.61	405.194	242.241	255.675	230.549	269	20.18	5.81084	5.05075	69.3918	3.7258	9.22493	11.0417	10.6155	6.12736	20.3698	5059.45	3655.66	3218.13	4151.37	4482.8	shha	PREDICTED: sonic hedgehog protein [Cyprinodon variegatus]
g18310.t1	367.691	3.27486	2.24673e-22	3.90439	10.3799	8.04897	35.9856	15	8.83328	298.85	271.306	276.983	237.87	168.583	230.546	139.585	160.76	256.758	123.028	135	149.669	159.383	138.896	111.554	117.363	143.909	135.261	30.667	30.6368	70.7583	833.959	1294.43	1339.63	1465.65	1294.14	chmp4c	charged multivesicular body protein 4c [Fundulus heteroclitus]
g18361.t1	3832.76	3.65922	2.45593e-21	373.845	531.26	531.232	464.122	634	709.071	914.326	1013.5	1166.12	1015.61	845.945	973.317	985.069	1082.38	946.863	1165.15	1007	1253.69	1244.35	1571.62	1883.24	1820.99	1909.56	1777.71	107.334	280.837	279.817	7931.66	12366.7	10927.4	22752.9	15274.2	-	uncharacterized protein LOC105915826 [Fundulus heteroclitus]
g18363.t1	2893.16	4.4268	3.07689e-08	14.6414	37.7449	42.9278	380.155	50	55.4087	3719.52	3690.18	7918.46	2960.54	1803.94	130.972	1261.05	1119.81	1042.2	1570.42	546	61.381	31.5446	53.0329	131.757	47.504	138.374	105.816	7.077	46.9764	268.024	4414.83	13824.2	10287.1	4734.88	24369.4	dfa	PREDICTED: mannose-specific lectin-like [Poecilia latipinna]
g18387.t1	4565.91	3.01256	1.25269e-09	1061.02	871.908	774.49	649.586	1081	1140.3	848.779	1085.22	1117.24	1057.59	1242.67	1787.85	1266.63	846.742	788.692	939.771	807	1847.32	1600.47	2329.24	1928.04	1535.03	2299.77	2339	258.31	10147.9	454.568	13887.7	12320.9	10335.6	21417	15218.4	Cd38	ADP-ribosyl cyclase/cyclic ADP-ribose hydrolase 1-like [Xiphophorus couchianus]
g18388.t1	2.7696	2.30089	2.0163e-05	1.95219	0.943623	1.78866	0.922707	1	1.60605	1.11097	1.03949	5.81898	1.16603	2.01896	1.79413	1.59525	1.10109	1.08337	2.0677	2	1.68167	0.83012	0.841791	0.878378	0.93145	2.76748	0.92014	1.1795	3.06368	1.07209	5.56901	1.69873	6.05481	17.6821	6.48365	CD38	ADP-ribosyl cyclase/cyclic ADP-ribose hydrolase 1-like, partial [Fundulus heteroclitus]
g18421.t1	11.6764	2.94959	1.96721e-06	4.88048	4.71812	0.89433	3.69083	1	1.60605	7.77677	5.19744	4.65518	12.8263	3.02844	6.27946	4.78576	13.2131	16.2505	9.30466	6	0.840835	1.66024	1.68358	0.878378	0.93145	1.84499	0.92014	5.8975	2.04245	10.7209	4.17676	42.4682	51.4659	56.9757	29.8248	Apod	apolipoprotein D [Fundulus heteroclitus]
g18422.t1	1445.84	3.99737	3.03061e-07	25.3785	26.4215	108.214	47.0581	62	25.6968	1110.97	862.774	1147.5	1008.61	700.58	271.811	417.956	1014.11	1154.87	971.821	717	6.72668	39.8458	88.3881	98.3783	7.4516	88.5593	56.1285	62.5135	28.5943	116.858	747.64	6971.57	6657.27	4630.75	8488.39	APOD	apolipoprotein D [Fundulus heteroclitus]
g18431.t1	152.25	2.4046	3.39471e-17	57.5897	44.3503	51.8711	35.9856	26	24.0908	112.208	143.449	186.207	109.607	67.6353	34.0885	185.049	111.211	87.7528	97.1821	76	39.5193	48.9771	40.406	72.9053	74.516	73.7994	80.0522	74.3085	58.2099	129.723	620.945	278.591	404.159	444.017	346.227	MAP3K15	PREDICTED: mitogen-activated protein kinase kinase kinase 15 isoform X1 [Poecilia mexicana]
g18432.t1	1167.46	5.65715	2.83707e-14	6.83267	5.66174	2.68299	11.0725	3	8.03025	184.421	197.503	310.733	124.765	219.057	217.09	282.36	215.815	202.59	186.093	174	9.24919	4.98072	13.4687	54.4594	8.38305	32.2872	18.4028	4.718	8.16981	10.7209	7500.06	5407.05	3113.69	6061.03	3173.1	CCL20	PREDICTED: C-C motif chemokine 20-like [Cyprinodon variegatus]
g18436.t1	60.3236	2.22131	1.03038e-07	813.088	855.866	808.474	794.451	563	422.391	29.9961	59.2508	60.5174	59.4674	42.3982	30.5002	30.3098	46.246	39.0012	47.5572	53	26.0659	29.8843	56.4	12.2973	9.3145	11.9924	9.2014	37.744	28.5943	45.028	364.77	107.02	56.007	153.245	102.442	Cnksr2	PREDICTED: connector enhancer of kinase suppressor of ras 2 [Cyprinodon variegatus]
g18462.t1	251.362	2.0924	2.72835e-11	269.403	196.274	194.964	203.918	241	181.484	107.764	165.278	115.216	107.275	96.9102	125.589	196.216	114.514	118.087	92.0128	106	179.939	142.781	138.896	139.662	194.673	117.157	113.177	380.978	188.927	204.77	1403.39	489.233	425.351	471.523	354.007	AVL9	PREDICTED: late secretory pathway protein AVL9 homolog [Cyprinodon variegatus]
g18471.t1	12.4781	2.76735	2.68938e-05	2.92829	0.943623	1.78866	9.22707	5	2.40908	4.44387	2.07897	3.49139	4.66411	1.00948	4.48533	6.38101	4.40438	3.2501	3.10155	4	2.52251	2.49036	0.841791	2.63513	0.93145	1.84499	3.68056	1.1795	5.10613	10.7209	32.0218	25.4809	22.7055	66.7991	41.4954	-	C-C motif chemokine 4-like [Acanthochromis polyacanthus]
g18483.t1	64.1193	3.67669	7.38735e-06	0.976096	1.88725	0.89433	2.76812	1	0.803025	48.8826	45.7374	64.0087	24.4866	39.3698	17.9413	36.6908	47.3471	54.1684	42.3879	39	0.840835	1.66024	1.68358	6.14864	0.93145	9.22493	1.84028	1.1795	1.02123	1.07209	38.9831	212.341	358.748	257.373	295.654	HHLA2	PREDICTED: V-set domain-containing T-cell activation inhibitor 1-like [Cyprinodon variegatus]
g18485.t1	9.69608	3.02632	3.68812e-16	0.976096	0.943623	0.89433	1.84541	2	0.803025	3.3329	6.23692	2.32759	1.16603	1.00948	6.27946	3.19051	4.40438	2.16674	2.0677	5	4.20418	4.1506	5.89254	1.75676	7.4516	8.30243	4.6007	3.5385	1.02123	3.21628	12.5303	30.5771	45.4111	29.4702	38.9019	-	uncharacterized protein LOC113011182 isoform X1 [Astatotilapia calliptera]
g18577.t1	673.58	4.02127	3.31056e-09	16.5936	18.8725	20.5696	24.9131	25	17.6666	242.191	355.505	271.164	336.982	289.721	498.769	116.453	409.607	414.93	314.291	303	43.7234	43.9963	19.3612	77.2972	11.1774	11.0699	70.8508	14.154	27.5731	23.5861	3309.38	2235.52	2602.06	2838.96	1784.3	Hhipl1	HHIP-like protein 1 [Fundulus heteroclitus]
g18586.t1	403.281	2.73196	2.20547e-10	241.096	184.007	253.99	209.455	229	234.483	96.6542	186.068	197.845	169.074	122.147	222.472	98.9057	170.67	188.506	70.3019	152	105.104	86.3325	122.902	147.567	113.637	39.6672	122.379	540.211	392.151	541.408	1060.9	1272.35	1725.62	1499.05	518.692	LDAH	lipid droplet-associated hydrolase [Fundulus heteroclitus]
g18588.t1	666.135	2.21644	6.00238e-37	847.252	653.931	556.273	785.224	594	563.724	476.605	320.162	414.311	426.766	410.859	529.269	344.575	389.787	445.264	418.71	461	323.722	248.206	253.379	404.932	399.592	343.167	345.052	498.928	371.726	420.261	2617.43	1357.28	1329.03	1878.23	1496.43	Dglucy	UPF0317 protein C14orf159 homolog, mitochondrial [Fundulus heteroclitus]
g18597.t1	272.635	3.54501	5.06955e-14	217.669	137.769	194.07	266.662	131	145.348	113.319	72.7641	117.543	160.912	178.678	63.6917	30.3098	85.8854	42.2513	165.416	78	18.4984	24.9036	37.0388	38.6486	32.6008	35.9772	26.6841	185.181	183.821	180.112	1330.99	795.004	435.946	884.106	1370.64	SDSL	serine dehydratase-like [Fundulus heteroclitus]
g18605.t1	167.68	2.03941	0.0376249	1.95219	3.77449	1.78866	50.7489	4	4.01513	208.862	170.476	251.38	219.213	123.157	17.9413	329.42	202.601	217.757	180.924	125	0.840835	2.49036	3.36717	41.2837	3.7258	19.3723	9.2014	8.2565	12.2547	21.4419	44.5521	358.431	776.53	208.256	689.86	Capn1	calpain-1 catalytic subunit [Fundulus heteroclitus]
g18606.t1	312.968	3.33093	0.000319579	5.85658	0.943623	2.68299	5.53624	5	11.2424	56.6594	69.6456	65.1725	43.143	80.7585	65.4858	8.77389	75.9755	79.0859	112.69	62	0.840835	13.2819	0.841791	14.9324	2.79435	5.53496	8.28126	596.827	253.264	548.913	1250.24	815.389	988.448	1076.64	1203.37	Capn8	calpain-2 catalytic subunit-like isoform X1 [Fundulus heteroclitus]
g18618.t1	2351.62	4.78315	7.7042e-08	5.85658	0.943623	0.89433	8.30436	2	2.40908	815.45	937.617	1050.91	1176.52	784.367	1301.64	204.192	840.135	1025.95	810.54	747	32.7926	9.96144	12.6269	141.419	13.0403	33.2097	47.8473	9.436	3.06368	37.5233	11699.1	9232.58	7470.12	11338.2	8459.87	-	alcohol dehydrogenase 1 [Fundulus heteroclitus]
g18619.t1	3589.15	5.4737	2.49968e-09	2.92829	1.88725	2.68299	2.76812	1	2.40908	837.67	857.577	853.062	1139.21	870.173	1202.07	173.085	854.449	833.11	864.3	844	20.18	9.13132	5.05075	130	13.0403	38.7447	52.448	9.436	5.10613	17.1535	18546.2	13868.4	12044.5	17898.2	14559.7	-	alcohol dehydrogenase 1 isoform X2 [Fundulus heteroclitus]
g18654.t1	31.8857	2.83854	1.71225e-18	17.5697	1.88725	6.26031	2.76812	11	7.22723	6.66581	22.8687	9.31036	10.4943	11.1043	4.48533	24.7264	5.50547	9.75031	9.30466	11	12.6125	13.2819	6.73433	18.4459	17.6976	28.5973	27.6042	10.6155	8.16981	13.9372	51.5133	90.0325	137.747	100.199	114.112	ZBED1	PREDICTED: zinc finger BED domain-containing protein 1-like [Nothobranchius furzeri]
g18657.t1	4972.65	2.79812	6.60326e-16	2504.66	3126.22	3175.77	2653.71	3142	3354.24	2205.27	2347.16	1829.49	2494.13	2519.67	3063.48	1350.38	2219.81	2192.74	2435.75	2558	3337.28	2250.45	2458.87	2541.15	3912.09	2749.95	2270.91	298.413	2426.43	610.022	13240.3	14199.7	12975.5	19682.2	15918.7	ID2	DNA-binding protein inhibitor ID-2 [Salarias fasciatus]
g18684.t1	575.798	2.65167	2.51566e-34	1011.24	862.472	694	876.572	647	615.92	346.622	308.728	286.294	315.994	290.731	286.164	221.74	388.686	437.681	423.879	437	228.707	174.325	189.403	199.392	193.742	162.359	182.188	250.054	326.793	219.779	1992.31	1642.67	1516.73	1622.82	1707.79	Oxr1	PREDICTED: nuclear receptor coactivator 7-like isoform X3 [Poecilia formosa]
g18689.t1	3686.45	2.43669	2.05578e-45	4450.02	5175.77	4805.23	4406.85	5213	5737.62	3401.78	3231.77	3944.1	3682.32	2907.31	2227.42	1744.41	1958.85	1859.06	2027.38	2090	1601.79	1739.93	1792.17	1438.78	1453.06	1602.37	1279.91	2360.18	2868.63	2145.26	12698.7	8848.67	6613.37	11159.4	11937.7	atp5if1b	ATPase inhibitor B, mitochondrial-like [Xiphophorus maculatus]
g187.t1	293.236	4.66786	2.15464e-32	16.5936	14.1544	23.2526	3.69083	27	20.8787	34.44	75.8826	97.7588	67.6296	36.3413	43.0592	58.2267	64.9646	86.6694	62.0311	59	25.2251	15.7723	23.5702	42.1621	28.875	53.5046	69.0105	5.8975	113.356	13.9372	448.305	949.588	1159.5	1728.92	1675.38	-	PREDICTED: uncharacterized protein LOC103464699 [Poecilia reticulata]
g18705.t1	17.6009	2.56141	2.93407e-05	0.976096	3.77449	6.26031	5.53624	2	1.60605	18.8865	21.8292	19.7845	13.9923	19.1801	8.97066	11.1668	18.7186	17.3339	16.5416	23	4.20418	1.66024	0.841791	3.51351	5.5887	3.68997	8.28126	1.1795	2.04245	1.07209	8.35351	74.744	72.6577	39.2936	59.6496	-	noncompact myelin-associated protein [Fundulus heteroclitus]
g18707.t1	789.86	2.01432	1.99806e-27	773.068	690.732	739.611	751.084	762	754.844	449.942	440.743	393.363	489.732	499.693	484.416	480.171	594.591	607.769	654.428	531	452.369	340.349	475.612	533.175	593.334	505.526	457.31	234.72	646.436	306.619	1298.97	1951.84	2116.16	1911.63	2420.99	NIPAL3	NIPA-like protein 3 [Xiphophorus couchianus]
g18708.t1	212.682	2.13235	0.000704463	0.976096	0.943623	1.78866	20.2996	3	6.4242	241.08	280.662	303.751	211.051	141.327	52.0298	194.621	214.713	288.176	220.21	129	79.0385	94.6337	79.9702	111.554	115.5	147.599	126.059	9.436	1.02123	16.0814	87.7119	574.169	923.359	286.843	845.468	grhl3	PREDICTED: grainyhead-like protein 3 homolog [Poecilia reticulata]
g18716.t1	363.545	4.00399	3.72927e-20	259.642	318.945	338.057	234.368	277	334.058	112.208	111.225	166.423	150.418	121.138	88.8095	138.787	164.063	141.921	187.127	180	13.4534	20.753	35.3552	44.7973	24.2177	41.5122	41.4063	42.462	105.186	96.4885	776.877	1590.01	1491	1595.32	1452.34	MSRA	peptide methionine sulfoxide reductase MsrA 1-like isoform X3 [Xiphophorus maculatus]
g18719.t1	10712.3	3.48017	0.00158859	44.9004	16.9852	19.6753	12.9179	69	54.6057	11576.3	11719.2	10841.9	5658.73	5825.72	8043.09	1480.39	9810.75	9536.89	11197.6	11120	38.6784	16.6024	24.4119	618.378	17.6976	63.652	611.893	30.667	1614.56	31.0907	87498.9	53110.7	18108.4	23906.2	5015.75	-	cathepsin L1 [Fundulus heteroclitus]
g18723.t1	470.047	2.89694	0.000545891	1.95219	9.43623	6.26031	35.9856	4	7.22723	594.368	549.889	908.924	473.407	427.011	338.194	654.054	429.427	488.599	386.661	266	15.135	19.9229	32.8299	44.7973	5.5887	98.7067	19.3229	4.718	4.08491	38.5954	361.986	1656.26	1887.59	1294.72	2174.62	GRHL1	grainyhead-like protein 1 homolog isoform X1 [Fundulus heteroclitus]
g18743.t1	790.357	4.27729	2.42939e-25	0.976096	1.88725	12.5206	23.0677	2	6.4242	194.419	347.189	325.863	254.194	186.754	470.063	118.846	133.232	147.338	207.804	163	161.44	200.059	163.308	150.203	131.335	210.328	190.469	21.231	12.2547	52.5326	3689.47	2283.09	1913.32	3988.3	3549.15	DEGS2	sphingolipid delta(4)-desaturase/C4-monooxygenase DES2 [Xiphophorus couchianus]
g18774.t1	1531.61	2.98542	2.32776e-20	822.849	946.454	836.199	798.142	824	737.98	381.062	736.996	509.742	471.075	549.158	621.667	516.862	339.137	367.262	410.439	353	824.86	1421.17	1692	583.243	845.757	572.868	594.41	309.029	550.441	429.91	8320.1	3896.88	3613.21	4367.48	4137.87	ITPK1	inositol-tetrakisphosphate 1-kinase isoform X2 [Xiphophorus hellerii]
g18788.t1	2830.72	5.1875	3.37735e-08	44.9004	22.647	21.4639	32.2948	28	25.6968	588.813	627.85	571.423	557.361	813.642	1559.1	294.324	738.834	746.44	725.764	649	34.4743	3.32048	5.05075	122.973	9.3145	44.2796	30.3646	7.077	10.2123	9.64885	14922.2	12903.5	7102.29	12273.3	12531.6	ENPEP	glutamyl aminopeptidase isoform X1 [Fundulus heteroclitus]
g18793.t1	143.417	2.35368	0.00014676	1.95219	3.77449	7.15464	7.38166	2	0.803025	125.539	125.778	124.526	113.105	109.024	129.178	155.537	173.973	143.005	105.453	100	46.2459	42.3361	95.9642	23.7162	27.0121	50.7371	63.4897	4.718	2.04245	4.28838	160.109	334.649	535.851	424.371	499.241	DAAM1	disheveled-associated activator of morphogenesis 1 [Fundulus heteroclitus]
g18799.t1	2503.23	2.2005	7.3432e-21	1425.1	750.181	808.474	1555.68	854	596.648	1225.4	1107.05	1022.98	939.819	1141.72	981.39	1749.19	1547.04	1445.21	1394.67	1165	2280.35	1225.26	1342.66	1856.01	2123.71	1973.21	2096.08	932.984	1050.84	426.694	6490.68	6512.92	6854.05	6174.99	6536.82	Syne3	nesprin-3 isoform X1 [Xiphophorus maculatus]
g18813.t1	10.6828	2.53789	2.72253e-07	1.95219	1.88725	7.15464	1.84541	2	0.803025	1.11097	4.15795	9.31036	6.99617	2.01896	0.897066	3.19051	7.70766	20.584	4.13541	5	3.36334	2.49036	2.52537	2.63513	3.7258	10.1474	6.44098	7.077	4.08491	4.28838	5.56901	28.8783	42.3837	23.5761	51.8692	PGBD4	PREDICTED: piggyBac transposable element-derived protein 4-like [Poecilia reticulata]
g18827.t1	1765.45	2.09033	2.89656e-08	850.18	712.436	750.343	608.064	685	684.981	462.163	585.231	394.527	595.84	526.949	683.564	639.696	429.427	502.683	441.455	439	1981.01	1561.46	1839.31	1108.51	1209.95	1265.66	1469.46	509.544	2509.15	462.073	5782.02	4297.78	3984.07	4269.25	3835.73	Atp10d	probable phospholipid-transporting ATPase VD isoform X2 [Xiphophorus couchianus]
g18861.t1	2506.47	2.86539	6.88343e-10	1103.96	942.68	740.505	1164.46	676	928.297	1489.81	1265.06	1020.65	1366.58	1839.28	2514.48	1095.14	2322.21	2278.32	1622.11	1351	596.152	773.672	622.084	687.77	675.302	507.371	792.24	288.977	108.25	220.852	9577.3	6327.76	6056.33	10687.9	6197.07	Aldh6a1	PREDICTED: methylmalonate-semialdehyde dehydrogenase [acylating], mitochondrial-like [Poecilia mexicana]
g18862.t1	4780.51	3.93556	7.73831e-35	1378.25	1103.1	913.111	921.784	1048	1129.86	1452.03	1452.16	1274.36	1669.75	1623.25	1948.43	812.781	1799.19	1855.81	1592.13	1365	475.072	669.907	549.69	791.418	485.286	559.953	673.542	2131.36	997.738	1854.72	11122.7	15169.6	18436.9	21939.6	23119.4	Gstz1	PREDICTED: maleylacetoacetate isomerase isoform X2 [Poecilia mexicana]
g18880.t1	1431.91	5.51724	1.30659e-36	40.996	45.2939	70.6521	28.6039	77	40.9543	118.874	129.936	81.4657	180.734	219.057	343.576	153.942	168.467	173.339	148.875	218	100.9	74.7108	78.2866	96.6215	54.9556	111.622	104.896	14.154	123.568	18.2256	9594.01	4217.94	2941.12	9575.85	4346.64	Flvcr2	feline leukemia virus subgroup C receptor-related protein 2-like isoform X2 [Xiphophorus hellerii]
g18888.t1	6923.82	2.32046	6.03441e-51	2768.21	2645.92	2602.5	2380.58	2575	2581.73	4117.25	3671.47	3747.42	4285.15	3668.46	3390.01	2851.51	4194.07	4176.38	4587.2	4092	3572.71	3112.95	3636.54	4681.75	5158.37	5139.21	4240.92	2732.9	3473.19	2720.98	16180.8	15855.9	15034.1	25155.7	21060.2	Dlst	PREDICTED: dihydrolipoyllysine-residue succinyltransferase component of 2-oxoglutarate dehydrogenase complex, mitochondrial-like [Cyprinodon variegatus]
g18890.t1	10.2967	2.124	0.00318977	0.976096	3.77449	0.89433	0.922707	2	0.803025	4.44387	7.27641	6.98277	4.66411	11.1043	12.5589	2.39288	19.8197	17.3339	11.3724	12	0.840835	3.32048	0.841791	2.63513	1.8629	0.922493	0.92014	1.1795	1.02123	5.36047	34.8063	39.0707	28.7604	25.5408	2.59346	OLFM4	PREDICTED: olfactomedin-4-like [Poecilia formosa]
g18921.t1	31.5884	2.63921	0.00067154	9.76096	1.88725	0.89433	6.45895	2	4.01513	13.3316	27.0267	12.8017	36.1469	28.2655	29.6032	6.38101	27.5274	47.6682	37.2187	54	3.36334	1.66024	0.841791	9.66215	2.79435	0.922493	3.68056	2.359	1.02123	3.21628	83.5351	139.296	107.473	55.011	80.3973	-	fibrinogen-like protein 1-like protein [Fundulus heteroclitus]
g18938.t1	473.518	5.55146	2.88905e-12	8.78487	4.71812	5.36598	16.6087	7	4.81815	112.208	76.922	154.785	132.927	103.977	104.06	51.8457	123.323	121.337	115.791	56	6.72668	1.66024	3.36717	21.0811	1.8629	16.6049	2.76042	4.718	1.02123	3.21628	1841.95	2004.5	1752.87	2334.04	2269.28	Cdc42ep3	PREDICTED: cdc42 effector protein 3-like [Poecilia reticulata]
g18951.t1	2095.21	2.08234	2.07212e-09	375.797	435.954	502.613	316.489	623	437.649	1250.95	1090.42	1330.22	937.486	1011.5	1076.48	1621.57	1093.39	1136.45	1117.59	832	1394.95	1685.97	1813.22	1557.36	1576.01	1592.22	2282.87	187.54	1678.9	239.077	4051.45	5062.2	5680.93	5349.82	6142.61	Spint1	kunitz-type protease inhibitor 1 [Seriola dumerili]
g18960.t1	839.267	4.67858	4.08564e-07	1.95219	0.943623	4.47165	53.517	7	4.01513	926.547	489.598	1272.03	719.439	283.664	26.912	221.74	318.216	408.43	382.525	80	5.88585	8.3012	2.52537	42.1621	2.79435	88.5593	6.44098	11.795	2.04245	33.2349	251.998	5101.27	3492.11	687.638	7628.66	-	-
g19018.t1	371.881	2.09566	1.9218e-06	11.7132	32.0832	33.0902	55.3624	35	23.2877	266.632	386.689	335.173	200.557	268.522	173.134	299.908	200.399	224.257	237.786	202	362.4	263.978	339.242	273.175	328.802	329.33	285.243	25.949	20.4245	41.8117	680.811	839.171	997.53	941.081	1225.41	Gjb4	gap junction beta-5 protein-like [Xiphophorus hellerii]
g1902.t1	26.595	3.14775	9.88749e-29	29.2829	38.6886	28.6186	35.0629	35	36.1361	5.55484	8.3159	4.65518	6.99617	13.1233	18.8384	15.9525	4.40438	10.8337	10.3385	16	11.7717	11.6217	5.05075	10.5405	6.52015	12.9149	7.36112	8.2565	4.08491	8.57676	87.7119	57.7567	74.1714	113.951	105.035	-	uncharacterized protein LOC105925480 [Fundulus heteroclitus]
g19022.t1	244.848	2.91743	2.05272e-09	12.6893	7.54899	21.4639	26.7585	12	15.2575	187.754	144.489	202.5	141.089	124.166	189.281	138.787	144.243	160.338	170.586	113	79.0385	127.008	90.9135	64.9999	63.3386	122.692	92.9341	8.2565	5.10613	11.793	388.438	735.548	837.078	901.788	989.405	KRTCAP3	transmembrane protein 54 [Fundulus heteroclitus]
g19025.t1	36.0621	2.47714	1.01726e-24	98.5857	102.855	65.2861	88.5799	97	102.787	21.1084	43.6585	70.9915	40.811	30.2844	23.3237	20.7383	17.6175	29.2509	33.0833	18	18.4984	17.4325	15.994	9.66215	8.38305	14.7599	12.882	22.4105	14.2972	10.7209	108.596	96.8274	92.3359	115.916	93.3646	FAM167A	protein FAM167A-like [Fundulus heteroclitus]
g1903.t1	639.485	2.05828	0.000146295	242.072	287.805	321.959	215.913	252	244.12	145.537	200.621	103.578	144.587	162.527	163.266	232.907	156.355	166.839	181.958	163	723.118	782.803	872.096	754.526	973.366	678.955	615.574	88.4625	70.4646	119.003	2567.31	1255.36	1021.75	1724.99	1360.27	PIP5K1B	phosphatidylinositol 4-phosphate 5-kinase type-1 beta-like [Xiphophorus hellerii]
g19052.t1	1140.86	2.08918	1.88392e-20	143.486	122.671	164.557	201.15	97	97.9691	707.686	671.509	758.795	465.245	453.257	375.871	626.137	877.572	681.438	653.394	453	992.186	850.873	808.12	599.932	1375.75	761.979	746.233	647.545	441.17	630.392	2756.66	2717.96	2589.95	3375.32	2895.6	CRYBG1	titin-like [Xiphophorus couchianus]
g19057.t1	6018.6	4.00145	3.81775e-118	2246.97	1823.08	1788.66	2281.85	2027	1851.78	1359.82	1502.06	1372.11	1684.91	1660.6	1604.85	1524.26	1246.44	963.114	1093.82	1095	2070.98	1804.68	2006.83	1394.86	2140.47	1420.64	1281.75	1129.96	1390.91	1096.75	24383.9	26114.5	13440.2	22293.2	27814.9	RAB3GAP2	rab3 GTPase-activating protein non-catalytic subunit isoform X2 [Xiphophorus couchianus]
g19058.t1	1018.55	2.49394	4.08207e-09	228.407	153.811	154.719	100.575	155	144.545	173.311	204.779	182.716	199.391	261.456	416.239	360.527	226.825	184.173	156.112	180	1014.89	662.436	808.961	544.594	1326.39	832.088	703.907	213.489	978.335	347.359	4380.03	2991.46	1954.19	2394.94	2672.56	KCNK5	PREDICTED: potassium channel subfamily K member 5-like [Poecilia latipinna]
g19073.t1	185.758	2.44212	9.3015e-33	115.179	84.9261	76.9124	83.0436	82	56.2118	101.098	137.212	104.742	130.595	140.318	157.884	59.0244	124.424	117.004	123.028	113	63.0627	68.0698	68.1851	95.7432	98.7337	78.4119	95.6946	81.3855	97.0165	85.7676	581.962	370.322	384.481	656.203	591.309	RBKS	ribokinase [Xiphophorus maculatus]
g1909.t1	1859.99	2.7861	5.30836e-37	301.614	265.158	299.601	270.353	258	277.044	492.159	759.865	627.286	580.682	531.997	851.316	570.303	776.272	710.689	717.493	703	1091.4	1071.68	1003.42	996.959	1171.76	1291.49	1359.97	554.365	464.658	383.81	5227.91	4802.3	5363.05	6556.13	6381.21	IQGAP1	PREDICTED: ras GTPase-activating-like protein IQGAP2 [Poecilia latipinna]
g19101.t1	38.9188	3.90157	3.15906e-12	0.976096	0.943623	1.78866	0.922707	1	2.40908	13.3316	13.5133	9.31036	23.3206	7.06637	21.5296	2.39288	17.6175	28.1676	14.4739	17	5.88585	5.81084	7.57612	4.39189	3.7258	1.84499	0.92014	5.8975	4.08491	17.1535	452.482	52.6605	74.1714	60.905	77.8038	SLC7A9	b(0,+)-type amino acid transporter 1-like [Fundulus heteroclitus]
g19125.t1	1975.2	2.10598	4.68305e-05	2107.39	2163.73	1789.55	1914.62	1797	2079.03	1708.67	1351.33	1382.59	2209.62	2219.85	3278.78	1529.85	1803.59	1834.14	1660.37	2412	223.662	279.75	238.227	600.81	570.979	452.944	322.049	1409.5	804.727	1087.1	4593.04	4919.51	5125.4	5899.93	4425.74	MEIS2	PREDICTED: homeobox protein Meis2 isoform X1 [Cyprinodon variegatus]
g19133.t1	1649.41	2.74041	1.52674e-18	47.8287	101.911	93.9046	91.348	47	65.045	678.801	733.878	741.338	859.363	879.258	1643.43	1749.19	503.2	566.601	569.652	676	1166.24	696.471	782.024	548.986	832.717	523.976	484.914	414.004	433	909.136	4714.17	4258.71	4887.75	5972.62	5018.34	BMP4	bone morphogenetic protein 4 [Xiphophorus couchianus]
g19141.t1	19.6815	3.05607	5.91417e-05	0.976096	0.943623	0.89433	0.922707	1	0.803025	27.7742	13.5133	26.7673	18.6564	11.1043	5.3824	19.143	24.2241	16.2505	27.914	8	0.840835	0.83012	0.841791	0.878378	0.93145	0.922493	0.92014	2.359	1.02123	7.50466	9.74577	86.635	80.2263	43.2229	99.8482	Fut9	PREDICTED: alpha-(1,3)-fucosyltransferase 9-like [Poecilia mexicana]
g19142.t1	100.202	3.61584	2.88242e-06	1.95219	0.943623	2.68299	3.69083	1	3.2121	52.2155	86.2774	138.492	44.3091	60.5689	25.1179	40.6789	72.6722	83.4193	94.0805	36	0.840835	0.83012	0.841791	7.02702	0.93145	21.2173	6.44098	7.077	8.16981	26.8024	75.1816	278.591	594.885	243.62	605.573	Fut9	PREDICTED: alpha-(1,3)-fucosyltransferase 9-like [Cyprinodon variegatus]
g1916.t1	3.09679	3.08922	1.96848e-06	0.976096	0.943623	0.89433	0.922707	1	0.803025	1.11097	1.03949	1.1638	1.16603	1.00948	2.6912	2.39288	1.10109	1.08337	1.03385	1	0.840835	0.83012	0.841791	0.878378	0.93145	1.84499	0.92014	1.1795	1.02123	1.07209	1.39225	1.69873	1.5137	11.7881	33.715	ARRDC3	arrestin domain-containing protein 4-like [Xiphophorus maculatus]
g19168.t1	183.276	2.19639	6.24255e-13	43.9243	43.4067	59.9201	35.0629	48	37.7422	39.9948	61.3297	53.5346	40.811	61.5784	89.7066	59.0244	50.6503	58.5019	58.9295	52	155.555	128.669	152.364	155.473	156.484	147.599	157.344	63.693	178.715	88.9839	789.407	348.239	336.042	508.852	390.316	keap1a	PREDICTED: kelch-like ECH-associated protein 1 [Poecilia formosa]
g1917.t1	21.1172	2.8017	3.48242e-05	0.976096	0.943623	0.89433	3.69083	2	0.803025	4.44387	8.3159	10.4742	13.9923	11.1043	7.17653	11.1668	27.5274	23.8341	18.6093	9	0.840835	1.66024	0.841791	4.39189	0.93145	3.68997	1.84028	11.795	1.02123	16.0814	6.96126	57.7567	110.5	53.0463	94.6613	Arrdc3	PREDICTED: arrestin domain-containing protein 3-like [Poecilia mexicana]
g19172.t1	98.3967	3.56831	1.59725e-09	60.518	100.024	57.2371	46.1354	44	50.5906	67.769	46.7769	45.388	44.3091	61.5784	41.265	16.7502	55.0547	61.752	71.3358	41	0.840835	4.98072	5.05075	20.2027	0.93145	14.7599	23.9236	21.231	37.7854	23.5861	107.203	462.054	523.741	174.856	490.164	RABGAP1L	rab GTPase-activating protein 1-like isoform X1 [Fundulus heteroclitus]
g19176.t1	759	5.62772	1.5734e-31	28.3068	22.647	8.9433	36.9083	20	20.0756	99.9871	82.1195	89.6122	118.935	111.043	91.5007	31.1074	115.615	126.754	93.0466	95	62.2218	62.259	75.7612	51.8243	53.0927	70.1094	76.3716	2.359	3.06368	8.57676	2462.89	3366.88	3673.76	3251.54	3674.93	F13G3.3	uncharacterized protein LOC105917700 [Fundulus heteroclitus]
g19184.t1	199.868	3.19712	1.08907e-09	367.012	347.253	284.397	238.058	254	305.15	62.2142	154.884	155.949	148.086	99.9387	48.4416	59.822	192.692	151.671	179.89	148	26.0659	16.6024	22.7284	34.2567	27.9435	50.7371	18.4028	18.872	20.4245	28.9466	579.177	795.004	723.55	738.719	499.241	Il6st	interleukin-6 receptor subunit beta-like [Fundulus heteroclitus]
g19190.t1	31.2906	4.51583	3.79683e-67	12.6893	8.49261	16.9923	16.6087	20	8.83328	9.99871	27.0267	8.14657	10.4943	7.06637	7.17653	5.58339	4.40438	2.16674	3.10155	2	5.88585	9.96144	8.41791	7.02702	4.65725	8.30243	6.44098	3.5385	1.02123	9.64885	109.988	100.225	115.041	166.998	136.157	IFI44L	PREDICTED: interferon-induced protein 44-like [Poecilia mexicana]
g19202.t1	1154.83	3.8819	3.46666e-07	313.327	192.499	179.76	466.89	155	221.635	502.157	758.826	530.691	644.813	578.433	997.538	96.5128	672.769	760.524	728.865	672	23.5434	17.4325	5.89254	133.513	15.8347	44.2796	46.007	207.592	45.9552	86.8397	4238.02	3710.02	4368.55	4281.04	4913.31	PLS1	plastin-1 [Fundulus heteroclitus]
g19217.t1	1417.45	4.95148	4.41581e-09	28.3068	29.2523	25.0412	32.2948	20	14.4545	344.4	509.349	420.13	567.856	485.561	723.035	66.203	454.752	449.598	395.965	419	18.4984	9.96144	7.57612	74.6621	16.7661	36.8997	46.007	8.2565	4.08491	6.43257	10756.5	5057.11	4395.79	4811.5	4323.3	SLC2A2	solute carrier family 2, facilitated glucose transporter member 2 [Fundulus heteroclitus]
g19295.t1	355.931	2.01488	0.000303268	111.275	74.5462	76.018	84.8891	62	130.09	209.973	195.424	216.466	302.001	304.863	391.121	354.146	361.159	335.844	343.239	433	21.8617	21.5831	30.3045	113.311	94.0765	87.6368	83.7327	303.131	221.606	338.782	396.792	737.247	750.797	1288.83	1195.58	AFDN	afadin-like isoform X2 [Fundulus heteroclitus]
g19296.t1	247.021	2.10962	6.10709e-07	141.534	120.784	135.044	131.024	156	118.848	188.865	160.081	186.207	206.387	138.299	303.208	118.846	147.547	165.755	147.841	167	71.471	47.3168	53.8746	79.9324	80.1047	58.117	64.4098	345.593	187.906	408.468	764.347	541.894	481.358	681.744	648.365	Dusp23	dual specificity protein phosphatase 23 [Fundulus heteroclitus]
g19304.t1	258.791	2.92692	8.37066e-15	21.4741	37.7449	28.6186	27.6812	30	42.5603	81.1006	162.16	114.052	117.769	109.024	90.6037	102.894	109.008	102.92	137.502	102	52.9726	78.0313	73.2358	190.608	98.7337	141.141	258.559	14.154	131.738	20.3698	420.46	616.638	731.119	1125.76	1180.02	abhd12	protein ABHD12B [Fundulus heteroclitus]
g19311.t1	538.448	3.02808	3.70138e-11	453.885	404.814	347.894	358.933	209	286.68	96.6542	98.7513	69.8277	121.267	129.214	183.001	94.1199	107.907	108.337	118.893	124	163.963	325.407	307.254	340.811	841.1	380.067	376.337	50.7185	56.1675	86.8397	1482.75	1328.4	1100.46	2752.52	1993.07	cdkl1	PREDICTED: cyclin-dependent kinase-like 1 isoform X1 [Cyprinodon variegatus]
g19313.t1	550.812	2.68338	4.85115e-47	250.857	294.41	278.137	292.498	297	253.756	282.186	341.991	296.768	269.352	327.072	447.636	186.645	258.757	276.259	262.598	244	322.04	284.731	308.096	255.608	250.56	242.616	268.681	176.925	139.908	205.842	2348.73	1336.9	1227.61	1709.27	1544.41	L2HGDH	L-2-hydroxyglutarate dehydrogenase, mitochondrial [Fundulus heteroclitus]
g19322.t1	53.5493	2.6232	0.00018551	69.3028	61.3355	63.4974	39.6764	63	44.9694	54.4374	53.0138	37.2414	37.3129	61.5784	49.3386	67.0006	59.4591	44.4181	51.6926	52	6.72668	2.49036	1.68358	3.51351	2.79435	14.7599	2.76042	11.795	4.08491	11.793	172.639	149.488	152.884	178.786	129.673	desi2	PREDICTED: desumoylating isopeptidase 2-like [Lates calcarifer]
g19325.t1	104.94	2.20541	1.07814e-06	431.435	559.569	423.912	459.508	376	404.725	77.7677	128.896	137.328	85.12	92.8723	45.7504	67.0006	136.536	111.587	124.062	125	31.9517	31.5446	65.6597	32.5	33.5322	21.2173	17.4827	15.3335	20.4245	27.8745	325.787	270.097	267.925	212.185	289.171	PACS2	phosphofurin acidic cluster sorting protein 2 isoform X5 [Salarias fasciatus]
g19335.t1	1697.19	2.62787	4.11548e-31	1026.85	1043.65	1002.54	979.915	925	1008.6	837.67	848.221	1020.65	880.351	789.414	789.418	551.957	714.61	824.443	734.035	626	707.143	736.316	656.597	794.932	674.37	662.35	642.258	1280.94	1096.8	1982.3	5478.51	3800.05	3641.97	5919.58	5984.41	CHP1	PREDICTED: calcineurin B homologous protein 1 [Poecilia mexicana]
g19396.t1	5473.64	4.9287	5.05961e-10	62.4702	47.1812	47.3995	38.7537	36	35.3331	1174.29	1439.69	1060.22	1428.38	1699.97	3651.06	735.412	1376.37	1447.38	1442.22	1730	77.3569	34.865	44.6149	276.689	18.629	75.6444	114.097	138.001	146.035	124.363	33902.7	16433.5	14757.1	29876.9	18189.2	EZR	ezrin [Fundulus heteroclitus]
g19398.t1	859.6	2.13556	7.1619e-19	655.937	671.86	650.178	589.61	767	632.784	1090.97	1080.03	1227.8	909.502	868.154	874.639	421.944	524.121	524.35	622.379	509	401.919	445.774	511.809	265.27	295.27	316.415	371.737	677.033	584.142	476.01	3594.8	1773.47	1480.4	1976.47	2094.22	mtarc1	PREDICTED: mitochondrial amidoxime-reducing component 1-like isoform X3 [Poecilia mexicana]
g19405.t1	714.172	3.26458	4.73231e-06	120.06	169.852	184.232	90.4253	119	160.605	336.623	518.704	320.044	579.516	486.57	819.918	153.144	579.176	661.938	449.725	581	68.9485	114.557	56.4	156.351	51.2298	57.1945	180.347	17.6925	7.14859	11.793	3323.31	1382.76	1503.11	4047.24	1747.99	Slc39a8	zinc transporter ZIP8 [Fundulus heteroclitus]
g19407.t1	453.335	2.18935	1.43314e-19	236.215	191.556	248.624	265.74	215	290.695	199.974	178.792	175.733	166.742	177.669	256.561	92.5247	157.457	169.005	181.958	161	291.77	305.484	285.367	258.243	322.282	299.81	299.966	338.516	280.837	537.119	1413.14	912.216	997.53	1298.65	1242.27	cml	PREDICTED: probable N-acetyltransferase camello [Poecilia latipinna]
g19436.t1	354.94	3.45324	0.000330862	0.976096	1.88725	0.89433	2.76812	1	0.803025	326.625	274.425	309.57	404.612	206.944	275.399	40.6789	257.656	256.758	267.768	219	1.68167	18.2626	0.841791	17.5676	1.8629	6.45745	36.8056	1.1795	2.04245	10.7209	1602.48	832.376	844.646	1677.84	1218.93	PLAAT4	retinoic acid receptor responder protein 3-like [Xiphophorus maculatus]
g1944.t1	1451.82	3.4595	0.000289159	2.92829	14.1544	8.9433	73.8166	14	16.0605	1907.53	2173.57	3331.95	1447.04	860.078	250.281	856.651	1333.43	1426.8	1345.04	843	5.04501	12.4518	2.52537	134.392	14.9032	106.087	49.6876	10.6155	7.14859	73.9745	1819.67	4518.61	6368.15	4658.25	8039.73	Aqp3	PREDICTED: aquaporin-3-like [Austrofundulus limnaeus]
g19451.t1	528.123	4.30085	4.61749e-14	189.363	206.654	159.191	112.57	88	97.9691	183.31	165.278	117.543	201.723	137.289	128.28	122.037	251.05	278.426	242.955	193	26.9067	19.9229	17.6776	84.3243	78.2418	65.497	58.889	4.718	21.4458	12.8651	1716.65	1856.71	1887.59	2577.66	2318.55	Exoc3l4	exocyst complex component 3-like protein 4 isoform X1 [Fundulus heteroclitus]
g19457.t1	64912.6	3.14875	4.29837e-07	3046.4	3271.54	3203.49	2937.9	3863	6398.5	8116.73	10425	8801.78	7147.75	7501.46	6178.09	6475.93	5433.9	6486.12	6817.22	5646	17435.6	19047.9	21927.8	14887.6	21708.4	23104.8	15578	122768	82391.5	58866.6	183853	190713	212861	256648	226811	CKB	PREDICTED: creatine kinase B-type [Cyprinodon variegatus]
g195.t1	394.889	2.11558	6.52777e-08	37.0917	10.3799	15.2036	55.3624	16	22.4847	224.415	281.701	328.19	208.719	217.039	165.957	185.049	358.957	374.845	332.9	288	150.51	134.479	113.642	428.648	300.858	160.514	630.296	67.2315	68.4222	129.723	647.397	1066.8	1273.02	958.763	1067.21	PKP1	PREDICTED: plakophilin-1-like [Cyprinodon variegatus]
g19501.t1	122.945	2.43943	0.000130296	39.0439	143.431	94.799	96.8843	55	182.287	31.1071	44.6979	44.2242	36.1469	56.531	67.28	142.775	14.3142	16.2505	19.6432	27	80.7202	47.3168	112.8	18.4459	19.5605	20.2948	26.6841	24.7695	7.14859	61.1094	324.395	236.123	311.823	565.828	273.61	foxa1	PREDICTED: forkhead box protein A1-A-like [Poecilia latipinna]
g19533.t1	893.548	4.15363	9.56198e-08	2.92829	5.66174	8.9433	27.6812	8	12.8484	539.93	555.086	887.976	657.64	434.077	256.561	431.516	465.763	534.1	523.129	304	9.24919	9.13132	13.4687	71.1486	15.8347	75.6444	16.5625	9.436	11.2335	83.6234	1141.65	3653.96	3548.12	3416.58	5520.18	LGALS3	galectin-5-like [Xiphophorus hellerii]
g1956.t1	1033.69	2.37159	1.08857e-56	994.642	823.783	791.482	880.263	896	794.995	488.826	632.008	664.527	571.354	682.409	719.447	545.576	449.247	444.181	498.316	442	576.813	576.103	608.615	491.013	581.225	520.286	576.928	560.262	536.144	691.501	4160.05	1933.15	1813.42	3506.95	2675.15	ttc37	LOW QUALITY PROTEIN: tetratricopeptide repeat protein 37 [Xiphophorus hellerii]
g19567.t1	775.097	2.04991	2.25118e-07	1273.81	2915.8	2742.02	725.248	850	719.511	373.285	519.744	448.061	383.623	465.371	632.432	476.981	384.282	333.677	330.833	511	126.125	812.687	925.97	346.959	142.512	155.901	197.83	912.933	709.752	853.387	1708.29	2130.2	2306.88	1605.14	1880.26	SLC16A6	monocarboxylate transporter 7 [Fundulus heteroclitus]
g19577.t1	402.288	4.62959	9.00135e-11	47.8287	17.9288	27.7242	28.6039	25	19.2726	121.095	163.199	131.509	123.599	186.754	219.781	38.2861	56.1558	55.2518	63.0649	49	11.7717	27.394	3.36717	13.1757	2.79435	2.76748	11.0417	201.694	80.6769	169.391	3370.64	998.851	1024.78	1265.25	1434.18	TMEM238	PREDICTED: transmembrane protein 238-like [Poecilia reticulata]
g19592.t1	2125.41	3.78741	4.68886e-13	153.247	142.487	141.304	151.324	156	154.984	1642.01	1157.99	1240.61	1142.71	1031.69	867.463	783.269	1282.78	1397.54	1130	857	100.059	131.159	115.325	215.203	61.4757	252.763	136.181	748.982	271.646	470.65	6479.54	6623.33	8605.4	7505.07	9872	PPL	PREDICTED: periplakin [Cyprinodon variegatus]
g19594.t1	464.186	2.08337	5.28043e-17	1342.13	1407.89	1566.87	881.185	1035	998.16	351.066	437.624	351.466	424.434	361.394	383.944	222.538	371.069	304.426	320.494	436	266.545	275.6	304.728	210.811	256.149	209.406	225.434	116.77	118.462	182.256	1413.14	924.107	930.927	1504.94	1037.38	rogdi	PREDICTED: protein rogdi homolog [Poecilia mexicana]
g19600.t1	6693.89	4.31086	1.52997e-19	8407.12	7078.12	6553.65	5239.13	3871	3987.82	2611.89	2293.11	2106.47	2048.71	2146.16	1562.69	2251.7	3239.42	2838.42	2306.52	2865	475.072	593.536	446.991	823.04	641.769	578.403	646.858	276.003	332.92	352.719	31038.9	35347.1	25266.7	20318.7	19729.7	Abat	4-aminobutyrate aminotransferase, mitochondrial isoform X1 [Xiphophorus maculatus]
g19656.t1	395.151	3.18574	2.66708e-09	14.6414	3.77449	27.7242	15.686	4	5.62118	262.188	159.042	304.914	242.534	208.963	177.619	249.657	170.67	169.005	166.45	148	153.873	155.232	134.687	187.973	130.403	154.979	274.202	4.718	1.02123	23.5861	613.983	1391.26	1210.96	1593.35	1772.63	PRRG4	PREDICTED: transmembrane gamma-carboxyglutamic acid protein 4-like [Cyprinodon variegatus]
g19666.t1	956.749	4.8798	1.43399e-13	6.83267	9.43623	16.9923	23.0677	33	33.7271	454.386	391.887	514.398	260.024	302.844	215.296	235.3	297.296	288.176	349.442	204	12.6125	6.64096	3.36717	36.0135	26.0806	51.6596	11.9618	120.309	39.8278	101.849	3619.86	3847.61	3973.47	3668.06	4666.93	TRPM4	transient receptor potential cation channel subfamily M member 4-like [Xiphophorus hellerii]
g19667.t1	5150.7	3.90049	0.000190853	32.2112	61.3355	53.6598	42.4445	16	22.4847	6526.94	3595.59	4583.03	3522.57	4527.52	3398.09	2008.42	3500.38	2006.4	2930.97	2051	29.4292	12.4518	5.89254	324.121	3.7258	382.834	92.014	5.8975	8.16981	36.4512	16804.5	16785.1	17969.2	20811.8	23849.5	arpc1a-a	actin-related protein 2/3 complex subunit 1A [Fundulus heteroclitus]
g19668.t1	19.5104	3.93156	1.02231e-09	0.976096	0.943623	0.89433	0.922707	1	0.803025	3.3329	6.23692	8.14657	6.99617	1.00948	7.17653	14.3573	4.40438	21.6674	9.30466	14	0.840835	0.83012	1.68358	1.75676	0.93145	1.84499	2.76042	1.1795	1.02123	1.07209	90.4964	98.5261	77.1989	47.1523	53.1659	SELL	C-type lectin galactose-binding isoform-like [Xiphophorus hellerii]
g19672.t1	81.9305	2.19885	8.06593e-08	1.95219	3.77449	1.78866	19.3769	9	0.803025	103.32	75.8826	108.233	55.9693	65.6163	145.325	67.0006	62.7624	66.0854	58.9295	53	18.4984	24.0735	30.3045	12.2973	19.5605	35.9772	22.0834	44.821	29.6156	38.5954	83.5351	263.303	207.377	188.609	325.479	dlx4a	homeobox protein Dlx4a-like [Xiphophorus maculatus]
g19673.t1	47.236	2.18471	7.20011e-05	5.85658	15.098	16.0979	15.686	11	14.4545	16.6645	66.5272	72.1553	64.1315	31.2939	61.8976	32.7027	35.235	35.7511	26.8801	38	3.36334	6.64096	5.89254	7.02702	5.5887	16.6049	6.44098	44.821	31.658	87.9118	107.203	113.815	118.069	135.563	136.157	dlx3b	PREDICTED: homeobox protein Dlx3b-like isoform X2 [Cyprinodon variegatus]
g19685.t1	470.609	4.33113	1.11531e-06	9.76096	11.3235	5.36598	58.1306	42	46.5755	178.866	175.673	193.19	200.557	264.484	381.253	52.6433	211.41	184.173	197.466	216	5.04501	2.49036	0.841791	24.5946	2.79435	7.37994	18.4028	7.077	7.14859	4.28838	2203.94	1369.17	1601.5	2277.06	1786.89	aspdh	putative L-aspartate dehydrogenase [Xiphophorus hellerii]
g19686.t1	950.233	5.05699	4.2606e-07	2.92829	1.88725	6.26031	2.76812	5	4.01513	193.308	273.385	150.13	202.889	360.385	366.9	62.2149	335.834	279.509	280.174	355	7.56752	3.32048	0.841791	60.6081	2.79435	9.22493	11.9618	4.718	1.02123	2.14419	6902.79	2437.67	2506.69	4736.84	3205.52	TMEM86B	PREDICTED: lysoplasmalogenase [Cyprinodon variegatus]
g1969.t1	1627.11	7.23019	6.31733e-24	1.95219	0.943623	0.89433	3.69083	2	4.01513	74.4348	113.304	103.578	135.259	115.081	87.0154	12.762	115.615	124.587	147.841	126	8.40835	2.49036	3.36717	37.7702	3.7258	23.0623	8.28126	15.3335	7.14859	19.2977	8506.66	5974.42	4650.1	9823.39	7834.84	BCO2	beta,beta-carotene 9',10'-oxygenase-like isoform X2 [Xiphophorus couchianus]
g1970.t1	13163.1	2.70058	0.00326093	8.78487	11.3235	559.851	823.055	10	15.2575	12569.5	11399	11646.1	12558.1	7528.71	12834.3	5519.57	7306.86	5790.6	6803.78	8033	30.2701	24097.5	1427.68	739.594	1444.68	1561.78	25686.6	31.8465	296.156	137.228	84678.2	18538.2	16367.7	52946.1	22528.1	CELA2A	PREDICTED: chymotrypsin-like elastase family member 2A [Poecilia latipinna]
g19702.t1	501.82	4.36772	1.80174e-24	0.976096	0.943623	8.04897	8.30436	2	3.2121	253.301	133.054	238.578	132.927	167.574	158.781	66.203	258.757	126.754	211.94	180	26.0659	44.8265	24.4119	47.4324	26.0806	64.5745	63.4897	82.565	57.1887	91.1281	1848.91	1678.34	1359.31	2096.31	2915.05	GDPD3	glycerophosphodiester phosphodiesterase domain-containing protein 3-like isoform X1 [Fundulus heteroclitus]
g19708.t1	1304.62	2.07873	6.5133e-07	661.793	818.121	750.343	884.876	486	520.36	423.279	641.364	455.044	528.211	562.281	895.272	634.911	466.864	501.599	521.061	604	1433.62	1348.94	1549.74	1104.12	1323.59	1053.49	1200.78	132.104	360.493	141.517	4169.8	3429.73	2167.62	3343.88	3218.48	Slc9a3r1	PREDICTED: Na(+)/H(+) exchange regulatory cofactor NHE-RF1-like [Poecilia mexicana]
g19711.t1	84.7513	2.26483	2.5901e-10	31.2351	59.4483	41.1392	35.0629	32	40.9543	34.44	31.1846	33.7501	37.3129	56.531	123.795	44.6671	68.2679	39.0012	51.6926	61	40.3601	29.8843	40.406	43.9189	63.3386	51.6596	63.4897	16.513	17.3609	8.57676	140.617	208.943	252.788	265.232	258.049	-	PREDICTED: uncharacterized protein LOC106957410 [Poecilia latipinna]
g19712.t1	1139.54	2.34999	1.44185e-08	13074.8	15250.8	12536.7	10075	10782	12899	1274.28	999.987	1238.28	1223.16	935.789	191.972	453.052	1177.07	1033.53	1047.29	855	372.49	392.647	415.845	351.351	329.733	244.461	241.997	497.749	277.774	335.566	2830.45	2994.85	2273.58	3768.25	3624.36	Trim39	PREDICTED: E3 ubiquitin-protein ligase TRIM69-like isoform X2 [Poecilia reticulata]
g19724.t1	546.333	3.71467	0.000234486	1.95219	6.60536	0.89433	12.9179	6	2.40908	589.924	358.623	748.32	292.673	288.712	61.8976	216.157	585.782	410.596	540.704	296	1.68167	0.83012	1.68358	49.1891	1.8629	62.7295	25.7639	2.359	1.02123	6.43257	676.635	2002.8	2306.88	1962.71	3017.49	-	uncharacterized protein LOC116735802 [Xiphophorus hellerii]
g19725.t1	28.1937	2.60621	0.000487382	29.2829	19.8161	37.5619	31.372	17	7.22723	24.4413	29.1056	29.0949	22.1545	41.3887	57.4122	10.3691	13.2131	17.3339	21.7109	8	0.840835	0.83012	0.841791	2.63513	0.93145	3.68997	2.76042	29.4875	5.10613	8.57676	32.0218	91.7312	104.446	39.2936	143.937	RASD2	PREDICTED: ras-related protein Rap-1b-like [Cyprinodon variegatus]
g19727.t1	3801.23	3.11616	3.03608e-06	564.184	480.304	502.613	316.489	385	323.619	1607.57	1518.69	1362.8	1549.65	2200.67	2754.89	2060.27	1373.06	1228.54	1330.57	1584	1343.65	1430.3	1010.99	1934.19	3393.27	2080.22	2192.69	16.513	32.6793	38.5954	22941.5	7771.67	8275.41	17000.4	6005.16	cygb1	PREDICTED: cytoglobin-1-like [Poecilia latipinna]
g19730.t1	117.753	3.70043	8.73175e-07	12.6893	3.77449	6.26031	6.45895	1	1.60605	105.542	79.001	76.8105	59.4674	49.4646	4.48533	31.1074	134.334	82.336	111.656	64	3.36334	7.47108	1.68358	11.4189	6.52015	15.6824	16.5625	2.359	2.04245	12.8651	79.3584	416.188	715.981	383.112	549.813	FAM83G	PREDICTED: protein FAM83G [Poecilia reticulata]
g19759.t1	350.809	3.85549	2.84189e-07	0.976096	3.77449	1.78866	19.3769	2	5.62118	355.51	253.635	294.44	257.692	253.38	183.899	182.656	193.793	217.757	227.447	130	10.9309	28.2241	14.3105	16.6892	9.3145	32.2872	4.6007	2.359	5.10613	18.2256	641.828	1348.79	1374.44	1235.78	1926.94	litaf	PREDICTED: lipopolysaccharide-induced tumor necrosis factor-alpha factor homolog [Cyprinodon variegatus]
g19783.t1	219.802	5.62648	1.08513e-28	9.76096	16.9852	15.2036	63.6668	31	45.7724	37.7729	48.8559	52.3708	39.6449	32.3034	46.6474	25.524	34.1339	46.5848	38.2525	38	3.36334	6.64096	4.20896	8.78378	6.52015	11.9924	3.68056	5.8975	4.08491	19.2977	794.976	983.562	862.811	1108.08	1006.26	baiap2l2	PREDICTED: brain-specific angiogenesis inhibitor 1-associated protein 2-like protein 2 isoform X1 [Cyprinodon variegatus]
g19794.t1	768.172	4.63923	1.59961e-13	96.6335	84.9261	76.9124	60.8987	51	63.439	397.726	298.333	259.526	171.406	281.645	376.768	82.1555	275.274	216.674	251.226	193	42.8826	48.9771	26.0955	54.4594	44.7096	33.2097	102.136	2.359	5.10613	33.2349	4183.72	2111.52	2461.28	3298.7	3459.68	Tspan1	tetraspanin-1-like [Xiphophorus hellerii]
g19808.t1	389.025	2.24225	0.000114092	1290.4	1236.15	1131.33	529.634	569	505.906	257.745	285.859	368.923	159.746	294.769	95.089	279.169	129.929	73.669	130.265	63	429.667	694.81	534.537	169.527	209.576	209.406	171.146	12.9745	76.592	34.307	2522.76	467.15	449.57	1013.77	627.617	nfil3	nuclear factor interleukin-3-regulated protein [Fundulus heteroclitus]
g19810.t1	233.084	2.65543	0.000213409	872.63	753.955	498.142	367.237	190	173.453	374.396	233.885	330.518	151.584	277.607	113.03	103.691	290.689	261.092	260.531	214	19.3392	14.112	6.73433	29.8648	3.7258	22.1398	11.0417	30.667	37.7854	92.2001	995.461	467.15	561.584	852.671	551.11	Rgl1	PREDICTED: ral guanine nucleotide dissociation stimulator-like 1 [Cyprinodon variegatus]
g1984.t1	30.0674	2.51356	0.000222026	4.88048	4.71812	2.68299	1.84541	3	5.62118	77.7677	94.5933	102.414	54.8033	31.2939	22.4267	4.78576	33.0328	35.7511	46.5233	23	1.68167	4.1506	3.36717	9.66215	3.7258	1.84499	11.9618	2.359	1.02123	4.28838	105.811	105.321	113.528	58.9404	44.0888	IDO2	indoleamine 2,3-dioxygenase 2-like [Xiphophorus couchianus]
g19867.t1	4614.3	4.15315	1.17274e-12	5.85658	13.2107	92.116	163.319	8	9.6363	1050.98	1261.94	1224.31	1408.56	1187.15	1240.64	771.305	1326.82	1673.8	1239.59	1057	747.503	1254.31	919.236	1198.99	1105.63	1527.65	1682.94	20.0515	9.19104	54.6768	12045.8	14797.6	18505	22477.9	21200.2	EVPL	PREDICTED: envoplakin-like [Cyprinodon variegatus]
g19875.t1	283.184	2.84228	1.88133e-06	27.3307	60.3919	25.0412	71.0485	54	36.9392	287.741	221.411	512.07	221.545	187.764	96.8831	512.874	167.366	208.007	187.127	154	132.011	92.1433	101.015	42.1621	61.4757	68.2645	52.448	3.5385	5.10613	22.514	490.073	771.222	1053.54	811.412	1250.05	Gprc5b	PREDICTED: retinoic acid-induced protein 3-like isoform X1 [Poecilia reticulata]
g19909.t1	927.566	2.83261	8.71047e-13	161.056	164.19	105.531	643.127	536	592.633	227.748	428.269	372.414	303.167	223.095	347.165	384.456	290.689	378.095	302.919	326	661.737	625.91	708.788	617.499	813.156	603.31	631.216	82.565	98.0378	109.354	1897.64	2728.15	2983.51	3391.04	3307.96	Card11	caspase recruitment domain-containing protein 11-like isoform X1 [Fundulus heteroclitus]
g19923.t1	1109.1	2.17106	2.84596e-13	208.885	122.671	197.647	64.5895	235	150.969	651.027	558.205	503.923	516.55	539.063	652.167	802.412	562.659	450.681	591.363	501	843.358	684.849	779.499	833.58	843.894	946.477	1077.48	173.386	821.066	174.751	3523.79	2317.06	2642.93	3355.67	2433.96	PLBD1	phospholipase B-like 1 [Fundulus heteroclitus]
g19926.t1	874.322	6.55923	6.91912e-16	0.976096	0.943623	3.57732	0.922707	7	1.60605	77.7677	125.778	67.5001	90.9502	124.166	104.06	21.5359	100.2	115.92	85.8097	103	6.72668	1.66024	1.68358	45.6756	7.4516	6.45745	2.76042	2.359	3.06368	3.21628	4302.06	4267.2	4117.27	2945.05	3910.94	GUCY2C	heat-stable enterotoxin receptor-like [Fundulus heteroclitus]
g19930.t1	592.914	2.09465	4.4387e-41	833.586	863.415	748.554	596.992	598	640.814	307.738	293.135	256.035	201.723	302.844	335.503	303.098	311.61	317.427	316.359	333	380.058	315.446	325.773	317.094	482.491	376.377	426.025	357.388	348.238	489.947	2545.04	1289.33	1029.32	1463.69	1111.3	ACO2	aconitate hydratase, mitochondrial isoform X1 [Fundulus heteroclitus]
g19949.t1	3205.44	2.14418	6.61982e-12	2695	3170.57	3146.25	2989.57	3341	4368.46	4439.43	3531.14	4394.49	4307.31	3513	3852	2035.54	1505.2	1920.81	1840.26	2099	1632.06	1617.9	1676.85	1019.8	777.761	912.345	980.869	2606.69	2258.95	2320.01	14280.3	5092.78	4677.34	8644.59	8068.25	ATP5MF	PREDICTED: ATP synthase subunit f, mitochondrial [Cyprinodon variegatus]
g19997.t1	39.3421	3.0875	3.11468e-05	298.685	254.778	302.284	399.532	233	233.68	34.44	61.3297	76.8105	38.4789	35.3318	9.86773	4.78576	29.7296	44.4181	39.2864	45	4.20418	0.83012	0.841791	0.878378	0.93145	3.68997	3.68056	8.2565	5.10613	12.8651	265.92	100.225	62.0618	125.739	82.9907	DUSP3	PREDICTED: dual specificity protein phosphatase 3-like [Cyprinodon variegatus]
g2.t1	1136.26	3.19995	1.45717e-68	1522.71	1285.21	1227.02	1867.56	1297	1513.7	324.403	452.177	423.621	402.28	322.025	294.238	291.134	458.055	401.929	509.689	403	446.484	554.52	612.824	467.297	481.56	458.479	464.671	195.797	328.835	270.168	4508.11	3103.57	3522.39	4141.54	3630.84	Khk	PREDICTED: ketohexokinase isoform X4 [Cyprinodon variegatus]
g20047.t1	133.959	2.86188	1.07525e-06	13.6653	13.2107	26.8299	7.38166	28	20.8787	9.99871	8.3159	16.2931	11.6603	6.05689	6.27946	22.3335	26.4263	31.4177	28.9478	14	78.1977	52.2975	63.9761	50.0675	66.133	107.932	103.976	17.6925	292.071	17.1535	154.54	360.13	638.783	430.265	497.944	litaf	PREDICTED: lipopolysaccharide-induced tumor necrosis factor-alpha factor homolog [Poecilia latipinna]
g20067.t1	1317.58	2.17328	5.29583e-08	381.654	453.883	407.814	376.465	572	614.314	418.835	413.716	410.82	459.415	403.793	744.565	728.233	375.473	469.098	426.981	360	786.181	846.722	979.003	1119.05	922.136	1190.02	1171.34	211.13	2219.13	222.996	5204.24	2070.75	1739.24	5159.25	2750.36	ADAP1	PREDICTED: arf-GAP with dual PH domain-containing protein 1-like isoform X1 [Cyprinodon variegatus]
g20071.t1	266.533	2.09066	0.000654541	32.2112	40.5758	39.3505	28.6039	33	31.318	41.1058	42.619	39.569	36.1469	42.3982	53.824	70.1911	100.2	66.0854	77.5389	75	149.669	59.7686	95.9642	980.269	322.282	214.941	1901.01	17.6925	76.592	26.8024	576.393	511.317	714.468	774.083	771.554	SAMD9L	sterile alpha motif domain-containing protein 9-like isoform X1 [Xiphophorus hellerii]
g20119.t1	2287.34	2.41235	1.78905e-22	1138.13	1118.19	879.126	919.939	930	1163.58	1634.23	1398.11	1445.43	1946.1	1380.97	1416.47	819.96	2027.11	1719.3	1686.21	1904	784.499	622.59	653.23	1155.94	1287.26	1266.58	1071.96	1093.4	900.722	712.943	4459.38	5782.46	4651.61	9373.48	7397.84	NDUFB10	PREDICTED: NADH dehydrogenase [ubiquinone] 1 beta subcomplex subunit 10 [Cyprinodon variegatus]
g20125.t1	63.5741	2.34839	0.00613363	4.88048	3.77449	4.47165	3.69083	5	3.2121	107.764	56.1323	72.1553	100.278	81.768	57.4122	43.0718	93.593	84.5027	100.284	92	4.20418	0.83012	2.52537	3.51351	2.79435	14.7599	1.84028	5.8975	4.08491	6.43257	109.988	163.078	105.959	322.207	163.388	Hs3st6	heparan sulfate glucosamine 3-O-sulfotransferase 6 [Xiphophorus hellerii]
g20126.t1	169.552	2.25015	1.64992e-16	59.5419	77.3771	69.7577	56.2851	66	81.9086	123.317	130.975	130.345	100.278	143.346	219.781	76.5721	64.9646	75.8357	96.1482	69	85.7652	112.896	147.313	82.5675	74.516	95.0167	98.455	43.6415	72.5071	47.1722	562.47	263.303	384.481	457.77	562.781	FAHD1	acylpyruvase FAHD1, mitochondrial [Fundulus heteroclitus]
g20132.t1	475.944	3.99235	3.17322e-22	410.937	354.802	298.706	181.773	181	155.787	156.646	159.042	129.181	193.561	263.475	237.723	55.0362	212.511	180.922	201.601	188	59.6993	43.9963	47.1403	50.0675	54.0241	29.5198	50.6077	84.924	47.9977	108.282	2086.99	1525.46	1607.55	2170.97	1598.87	SLC5A11	sodium/myo-inositol cotransporter 2 [Xiphophorus couchianus]
g20154.t1	1308.69	5.56693	3.67177e-13	70.2789	49.0684	54.5541	29.5266	30	20.8787	209.973	384.61	199.009	208.719	249.342	442.254	96.5128	229.028	261.092	203.669	199	5.88585	5.81084	0.841791	48.3108	7.4516	21.2173	7.36112	75.488	101.101	183.328	5652.54	3808.54	4980.08	7548.3	6163.36	ANKS4B	ankyrin repeat and SAM domain-containing protein 4B [Fundulus heteroclitus]
g20172.t1	34.9502	2.46561	0.000606167	2.92829	1.88725	2.68299	1.84541	1	0.803025	28.8852	17.6713	18.6207	24.4866	26.2465	43.0592	47.8576	52.8525	28.1676	27.914	33	2.52251	0.83012	3.36717	1.75676	2.79435	5.53496	7.36112	4.718	4.08491	4.28838	26.4528	113.815	119.583	100.199	132.266	-	PREDICTED: uncharacterized protein LOC106961626 isoform X1 [Poecilia latipinna]
g20173.t1	11.7474	2.40759	0.00732696	0.976096	0.943623	0.89433	5.53624	1	0.803025	1.11097	1.03949	2.32759	1.16603	1.00948	0.897066	11.9644	5.50547	3.2501	3.10155	5	0.840835	0.83012	0.841791	3.51351	0.93145	0.922493	1.84028	1.1795	1.02123	6.43257	2.7845	28.8783	54.4933	21.6115	54.4627	NUGGC	nuclear GTPase SLIP-GC-like isoform X1 [Xiphophorus hellerii]
g20178.t1	13.4827	2.86957	9.95459e-05	0.976096	0.943623	0.89433	0.922707	2	7.22723	2.22194	1.03949	13.9655	4.66411	4.03793	0.897066	3.19051	7.70766	10.8337	11.3724	1	0.840835	0.83012	0.841791	2.63513	0.93145	2.76748	4.6007	4.718	34.7217	3.21628	1.39225	39.0707	63.5755	31.4349	73.9136	NUGGC	nuclear GTPase SLIP-GC-like [Xiphophorus maculatus]
g202.t1	284.3	2.76655	2.36824e-09	162.032	141.544	133.255	194.691	124	200.756	38.8839	32.2241	30.2587	54.8033	46.4361	24.2208	43.8695	95.7952	106.17	80.6404	81	136.215	96.2939	90.9135	251.216	471.314	310.88	212.552	54.257	61.2736	85.7676	370.339	837.472	1033.86	1170.95	910.304	PPP1R12B	PREDICTED: protein phosphatase 1 regulatory subunit 12B-like [Poecilia reticulata]
g20200.t1	168.268	2.9679	2.73706e-20	258.666	200.992	140.41	149.479	96	109.211	36.6619	64.4482	41.8966	54.8033	68.6447	64.5888	29.5122	82.5821	79.0859	94.0805	75	89.9694	61.4289	63.9761	76.4189	84.762	87.6368	104.896	7.077	87.8255	19.2977	579.177	370.322	445.029	789.801	483.68	ADAP1	PREDICTED: arf-GAP with dual PH domain-containing protein 1-like [Poecilia latipinna]
g20236.t1	253.315	2.78198	0.0108418	1.95219	1.88725	2.68299	0.922707	1	0.803025	319.959	183.989	239.742	138.757	194.83	287.061	58.2267	341.339	281.676	328.765	349	9.24919	0.83012	1.68358	18.4459	0.93145	1.84499	29.4445	2.359	2.04245	1.07209	2081.42	740.645	442.001	536.357	35.0117	Amn	protein amnionless [Fundulus heteroclitus]
g20260.t1	185.193	3.69255	6.03358e-10	10.7371	10.3799	9.83763	19.3769	21	12.8484	73.3239	90.4354	87.2846	109.607	81.768	148.913	47.8576	142.041	95.3364	101.317	112	12.6125	3.32048	8.41791	29.8648	14.9032	17.5274	11.0417	14.154	11.2335	25.7303	833.959	597.952	464.707	770.154	687.267	Hs3st3b1	PREDICTED: heparan sulfate glucosamine 3-O-sulfotransferase 3B1-like [Poecilia latipinna]
g20262.t1	20.8383	2.5773	4.75403e-05	40.0199	54.7302	84.067	70.1257	82	46.5755	37.7729	15.5923	19.7845	18.6564	16.1517	11.6619	18.3454	23.123	16.2505	13.4401	10	1.68167	1.66024	0.841791	2.63513	0.93145	0.922493	2.76042	22.4105	7.14859	17.1535	13.9225	86.635	65.0892	43.2229	93.3646	Rnf222	PREDICTED: RING finger protein 222 [Poecilia reticulata]
g20264.t1	679.706	5.703	1.15644e-12	0.976096	2.83087	0.89433	8.30436	5	4.81815	147.759	155.923	73.3191	97.9463	136.28	192.869	24.7264	123.323	139.754	130.265	136	7.56752	1.66024	2.52537	25.473	1.8629	9.22493	11.0417	7.077	3.06368	7.50466	3636.56	1950.14	2379.54	3937.22	2799.64	acsf2	medium-chain acyl-CoA ligase ACSF2, mitochondrial-like [Xiphophorus hellerii]
g20267.t1	209.624	3.29477	0.000823241	1.95219	1.88725	5.36598	2.76812	1	2.40908	247.746	285.859	343.32	179.568	145.365	72.6624	141.18	241.14	250.258	226.414	95	1.68167	0.83012	0.841791	16.6892	0.93145	36.8997	4.6007	1.1795	3.06368	4.28838	148.971	720.26	1091.38	587.439	1019.23	znf750	PREDICTED: zinc finger protein 750 [Poecilia mexicana]
g20270.t1	746.995	3.2888	9.55189e-24	277.211	244.398	179.76	187.31	128	178.272	167.756	221.411	192.026	129.429	221.076	252.076	302.3	309.408	308.76	289.478	241	282.521	219.982	276.108	435.675	584.019	366.23	301.806	88.4625	47.9977	95.4164	2319.49	2575.27	2589.95	2721.08	2466.38	Epn2	epsin-3-like isoform X2 [Xiphophorus maculatus]
g20280.t1	69.7495	2.03838	1.63389e-09	29.2829	19.8161	19.6753	10.1498	7	7.22723	49.9935	36.382	17.4569	60.6335	22.2086	29.6032	47.8576	63.8635	41.168	53.7603	30	30.2701	28.2241	26.9373	71.1486	82.8991	53.5046	60.7292	36.5645	11.2335	39.6675	51.5133	156.283	236.138	178.786	241.192	-	zinc-binding protein A33-like [Xiphophorus couchianus]
g20281.t1	386.68	3.5067	1.14531e-19	1.95219	4.71812	20.5696	10.1498	6	4.01513	56.6594	91.4749	45.388	71.1277	58.5499	98.6773	38.2861	79.2788	63.9187	64.0988	61	118.558	106.255	75.7612	308.311	340.911	143.909	250.278	102.616	57.1887	188.689	1239.1	1136.45	1042.94	1766.25	1622.21	Crb3	protein crumbs homolog 3 [Fundulus heteroclitus]
g20289.t1	541.068	5.48387	5.86057e-25	8.78487	4.71812	10.732	8.30436	31	32.121	85.5445	139.291	105.905	150.418	85.8059	134.56	111.668	89.1887	78.0025	112.69	92	25.2251	9.96144	10.9433	27.2297	14.9032	26.7523	23.0035	4.718	15.3184	19.2977	2973.85	1746.29	1412.28	3546.25	1908.79	-	PREDICTED: E3 ubiquitin-protein ligase TRIM39-like [Poecilia formosa]
g20293.t1	372.16	5.42491	6.56668e-13	0.976096	1.88725	1.78866	0.922707	12	0.803025	46.6606	60.2902	48.8794	148.086	89.8438	174.928	35.0956	68.2679	57.4185	70.3019	91	5.88585	3.32048	2.52537	14.9324	0.93145	9.22493	6.44098	1.1795	8.16981	11.793	2337.59	1292.73	1153.44	1599.25	1558.67	tmed1	PREDICTED: transmembrane emp24 domain-containing protein 1 [Poecilia reticulata]
g20298.t1	16.8364	2.01952	6.98766e-08	21.4741	6.60536	12.5206	9.22707	25	40.1513	7.77677	11.4344	29.0949	11.6603	2.01896	3.58826	11.9644	12.112	8.66694	9.30466	6	10.9309	4.98072	10.1015	14.054	13.9718	14.7599	11.9618	5.8975	28.5943	9.64885	20.8838	45.8656	63.5755	45.1876	32.4182	-	uncharacterized protein LOC105931992 isoform X1 [Fundulus heteroclitus]
g20318.t1	757.257	5.15435	1.08017e-11	1.95219	13.2107	5.36598	5.53624	4	2.40908	155.535	159.042	91.9398	205.221	166.564	300.517	68.5959	173.973	213.423	247.091	207	6.72668	37.3554	28.6209	52.7027	18.629	12.9149	21.1632	2.359	2.04245	2.14419	3185.47	2451.26	2950.21	4475.54	2869.66	NR5A2	nuclear receptor subfamily 5 group A member 2-like [Xiphophorus hellerii]
g20319.t1	2171.17	2.66063	9.40142e-06	83.9443	212.315	221.794	143.02	93	133.302	1119.86	1378.36	1771.3	773.077	805.566	447.636	757.745	2183.47	1896.98	2166.95	1409	588.585	1857.81	2211.39	439.189	440.576	837.623	679.063	16.513	64.3373	194.049	2460.11	6210.54	7353.57	7829.25	8301.66	HEBP2	heme-binding protein 2-like [Xiphophorus hellerii]
g20322.t1	1101.16	4.00678	6.4339e-17	241.096	154.754	190.492	178.082	157	138.923	503.268	532.217	604.01	614.497	476.475	616.284	429.921	545.042	459.348	450.759	438	61.381	64.7493	50.5075	165.135	129.472	107.932	104.896	127.386	60.2524	126.507	5017.68	3835.72	3239.32	4876.33	3875.93	RDH8	retinol dehydrogenase 8-like [Xiphophorus hellerii]
g2033.t1	129.912	2.95969	0.000239546	16.5936	8.49261	25.0412	31.372	11	19.2726	142.204	149.686	122.199	74.6258	75.7111	24.2208	28.7146	212.511	195.006	173.687	114	6.72668	6.64096	9.2597	20.2027	8.38305	27.6748	26.6841	4.718	2.04245	3.21628	97.4577	438.271	581.262	322.207	626.321	PLA2G3	PREDICTED: group 3 secretory phospholipase A2-like isoform X1 [Poecilia reticulata]
g20347.t1	19326.1	2.09282	0.136987	32.2112	45.2939	33.9845	36.9083	24	35.3331	12647.3	13803.3	1987.76	72030.2	48685.3	51116.6	9104.91	16866.6	11560.6	16065	48478	22.7026	20.753	17.6776	1174.39	12.1089	23.9848	1334.2	11.795	17.3609	6.43257	53182.7	25304.2	11605.6	107924	44254.8	hbb	hemoglobin subunit beta [Fundulus heteroclitus]
g20352.t1	30601	2.49955	0.0369301	84.9204	184.007	121.629	147.633	116	110.014	58178	45978.6	14669.6	101953	78367.1	21960.2	12789.9	35456.3	35821.6	38159.5	44066	101.741	146.931	120.376	4073.92	249.629	195.568	2013.27	30.667	26.5519	50.3885	92797.8	56265.2	58238.2	117211	107986	LOC101155030//LOC101174505	PREDICTED: hemoglobin subunit alpha-1 [Poecilia latipinna]
g20354.t1	109.463	3.14465	0.000853091	10.7371	7.54899	3.57732	1.84541	2	7.22723	22.2194	1.03949	5.81898	55.9693	17.1612	144.428	63.0125	48.4482	47.6682	46.5233	256	2.52251	4.98072	1.68358	29.8648	23.2863	16.6049	13.8021	1.1795	2.04245	1.07209	11.138	112.116	56.007	1390.99	233.411	LOC101155030//LOC101174505	hemoglobin embryonic subunit alpha-like [Fundulus heteroclitus]
g20393.t1	164.036	3.17431	8.71681e-16	19.5219	11.3235	25.0412	44.2899	39	36.9392	74.4348	108.107	93.1036	67.6296	57.5404	43.0592	39.8813	132.131	167.922	104.419	127	30.2701	39.8458	38.7224	61.4864	47.504	37.8222	35.8855	18.872	13.2759	36.4512	492.857	543.592	508.604	622.803	552.407	TMEM184A	transmembrane protein 184A [Xiphophorus maculatus]
g20398.t1	1359.43	3.47793	1.45746e-28	286.972	193.443	224.477	107.034	145	146.954	454.386	363.82	313.061	362.635	404.802	504.151	248.859	462.46	274.092	404.236	386	718.914	632.551	707.946	451.486	450.822	674.342	424.185	79.0265	287.986	109.354	4572.16	4104.12	3781.23	6049.25	5308.81	SNX8	sorting nexin-8 [Fundulus heteroclitus]
g20407.t1	417.154	2.35948	8.00715e-05	4.88048	4.71812	20.5696	38.7537	2	8.03025	383.284	396.045	351.466	461.747	492.627	580.402	768.114	182.782	225.341	185.059	222	201.8	291.372	357.761	72.9053	94.0765	138.374	57.0487	30.667	16.3396	19.2977	1413.14	1036.22	846.16	1218.1	1165.76	WNT9B	protein Wnt-9b-like [Xiphophorus maculatus]
g20421.t1	144.009	2.4562	0.000205244	0.976096	2.83087	5.36598	5.53624	1	2.40908	304.405	186.068	266.509	135.259	119.119	62.7946	110.072	143.142	106.17	116.825	98	49.6093	27.394	42.0896	74.6621	132.266	71.9544	129.74	1.1795	1.02123	2.14419	109.988	426.38	464.707	278.984	741.73	-	bryoporin-like [Xiphophorus maculatus]
g20425.t1	1126.45	3.20149	8.56118e-26	109.323	111.348	108.214	79.3528	103	128.484	452.164	628.89	512.07	479.237	413.887	806.462	732.221	565.963	546.017	619.277	538	321.199	341.179	292.102	286.351	243.109	179.886	338.611	185.181	167.481	225.14	3977.67	2852.16	3372.53	5102.27	3445.41	Mylk	myosin light chain kinase, smooth muscle [Fundulus heteroclitus]
g20426.t1	447.124	5.33821	1.01899e-10	0.976096	0.943623	0.89433	1.84541	1	4.81815	26.6632	41.5795	26.7673	74.6258	69.6542	137.251	53.441	18.7186	23.8341	29.9817	30	3.36334	6.64096	3.36717	5.27027	0.93145	0.922493	1.84028	255.951	49.0189	165.103	1773.73	1537.35	1492.51	2442.1	2266.68	C1QL2	C1q-related factor [Fundulus heteroclitus]
g20427.t1	165.566	2.13209	2.90576e-05	2.92829	3.77449	8.04897	17.5314	8	9.6363	66.6581	90.4354	79.1381	61.7995	144.356	251.179	180.264	35.235	83.4193	81.6743	141	28.5884	36.5253	38.7224	40.4054	36.3266	42.4347	62.5695	237.079	26.5519	56.821	363.378	217.437	382.967	758.366	381.239	si:ch73-141c7.1	PREDICTED: coenzyme Q-binding protein COQ10 homolog, mitochondrial-like [Poecilia formosa]
g20479.t1	386.63	3.65636	2.03349e-05	4.88048	12.2671	5.36598	6.45895	7	6.4242	33.329	32.2241	31.4225	44.3091	92.8723	123.795	20.7383	93.593	42.2513	47.5572	93	8.40835	5.81084	2.52537	15.8108	8.38305	11.0699	4.6007	521.339	183.821	740.817	1751.45	1068.5	1139.82	1577.64	1421.22	ST8SIA6	alpha-2,8-sialyltransferase 8F-like [Fundulus heteroclitus]
g20514.t1	2.29908	2.99158	6.35439e-08	0.976096	0.943623	0.89433	0.922707	1	4.81815	1.11097	1.03949	1.1638	1.16603	1.00948	0.897066	0.797626	1.10109	1.08337	1.03385	1	0.840835	0.83012	0.841791	0.878378	0.93145	0.922493	0.92014	1.1795	1.02123	1.07209	13.9225	5.09618	4.54111	1.96468	10.3738	Gimap8	GTPase IMAP family member 8-like [Fundulus heteroclitus]
g20520.t1	10857.6	2.4436	3.25833e-25	2191.34	1984.44	1958.58	1734.69	2005	2327.17	3648.42	3043.62	3848.67	3374.48	3468.58	4483.54	3477.65	5514.28	5362.67	5644.83	5688	4308.44	3842.62	4184.54	8086.34	10086.7	9666.8	7949.09	5019.95	4453.57	7240.93	18238.5	29926.5	27513.1	44169.9	31938.5	ndufa4	PREDICTED: cytochrome c oxidase subunit NDUFA4-like [Cyprinodon variegatus]
g20546.t1	3967.59	3.1501	1.00324e-09	170.817	201.935	171.711	160.551	159	177.469	3360.68	2728.65	3713.67	2691.19	2320.8	511.328	875.794	3889.07	4043.13	3693.95	2947	509.546	522.975	517.702	1227.97	789.87	1274.88	766.477	179.284	1050.84	424.55	6202.48	12399	12907.3	16397.2	17662.8	LOC100335037	cytochrome c oxidase subunit 6A, mitochondrial [Fundulus heteroclitus]
g20552.t1	1958.4	3.95216	0.000229486	1.95219	3.77449	5.36598	22.145	1	12.8484	1596.46	1539.48	1611.86	1684.91	1467.79	1283.7	1623.97	884.179	998.865	873.605	812	11.7717	3.32048	1.68358	85.2026	0.93145	70.1094	24.8438	4.718	3.06368	7.50466	4999.58	6169.77	7016.01	7163.22	11492.9	CLDN3	PREDICTED: claudin-4-like [Poecilia reticulata]
g2056.t1	861.43	2.4907	4.35018e-09	118.108	93.4187	117.157	109.802	110	96.363	109.986	233.885	162.931	185.398	167.574	215.296	275.979	281.88	255.675	285.343	294	642.398	472.338	478.137	869.594	1269.57	775.816	1012.15	145.078	161.354	205.842	2283.29	2187.96	2502.15	2970.59	2235.56	TRPM6	transient receptor potential cation channel subfamily M member 7 [Fundulus heteroclitus]
g20600.t1	384.139	2.48657	1.28837e-22	369.94	356.69	349.683	383.846	434	440.058	264.41	239.082	297.932	295.005	258.427	242.208	150.751	291.79	279.509	292.58	328	141.26	135.31	133.003	181.824	181.633	190.033	161.024	97.8985	70.4646	213.347	1090.13	961.479	843.133	1497.09	1029.6	natd1	PREDICTED: protein NATD1-like [Cyprinodon variegatus]
g20602.t1	527.79	2.43125	6.57529e-42	126.893	113.235	91.2217	153.169	131	158.196	332.179	218.292	264.182	304.333	245.304	409.959	257.633	202.601	254.591	239.854	246	406.964	379.365	376.281	273.175	270.121	290.585	226.354	155.694	183.821	326.989	1896.25	1224.78	1257.89	1383.13	1566.45	tmem220	PREDICTED: transmembrane protein 220 [Cyprinodon variegatus]
g20611.t1	117.154	3.33484	0.00026806	10.7371	1.88725	6.26031	20.2996	4	7.22723	155.535	147.607	144.311	167.908	108.015	45.7504	94.1199	84.7843	93.1696	102.351	62	2.52251	0.83012	0.841791	7.02702	0.93145	8.30243	3.68056	1.1795	1.02123	7.50466	109.988	580.964	419.296	298.631	604.276	-	PREDICTED: putative transmembrane protein [Poecilia reticulata]
g20648.t1	118.735	3.07561	0.00174793	0.976096	0.943623	0.89433	3.69083	1	2.40908	45.5497	84.1985	69.8277	74.6258	109.024	129.178	3.98813	116.716	169.005	98.2159	136	0.840835	2.49036	3.36717	22.8378	0.93145	1.84499	9.2014	8.2565	1.02123	6.43257	646.005	234.424	541.906	459.735	40.1986	ENPP7	ectonucleotide pyrophosphatase/phosphodiesterase family member 7-like [Fundulus heteroclitus]
g20655.t1	1089.95	2.39567	4.23101e-12	1606.65	1679.65	1559.71	1649.8	1388	1187.67	1137.63	1302.48	1358.15	721.771	967.083	523.887	1039.31	757.553	882.945	920.128	802	537.294	630.891	608.615	417.229	265.463	328.407	328.49	148.617	195.054	253.014	3852.36	3166.43	2726.18	2892.01	2370.42	HLF	hepatic leukemia factor [Archocentrus centrarchus]
g20677.t1	443.565	2.49464	4.78648e-13	43.9243	84.9261	37.5619	68.2803	54	32.924	197.752	256.753	271.164	155.082	163.536	190.178	248.859	269.768	250.258	236.752	188	318.677	272.279	300.519	277.567	384.689	304.423	321.129	46.0005	44.934	54.6768	1251.63	1241.77	1316.92	1196.49	1273.39	Arhgap27	rho GTPase-activating protein 27-like isoform X2 [Xiphophorus couchianus]
g20684.t1	37.5677	2.70861	1.40402e-10	1.95219	0.943623	11.6263	3.69083	1	2.40908	8.88774	14.5528	12.8017	8.1622	14.1327	5.3824	11.9644	6.60657	4.33347	9.30466	7	34.4743	51.4674	42.0896	19.3243	21.4234	21.2173	14.7222	8.2565	13.2759	8.57676	104.419	105.321	96.877	141.457	115.409	-	granulocyte colony-stimulating factor [Fundulus heteroclitus]
g20696.t1	14978.4	4.27312	1.20415e-05	75.1594	40.5758	40.2448	4226.92	60	29.7119	28243	11610	31503.9	11362.9	7685.18	2231	5857.77	7227.58	6387.54	9343.95	3053	50.4501	38.1855	14.3105	1063.72	26.0806	970.462	303.646	132.104	35.7429	231.572	24886.5	64801.3	40839.7	65121.2	97890.1	krt13	keratin, type I cytoskeletal 13-like [Xiphophorus maculatus]
g20697.t1	11488.6	3.41382	0.00146054	17.5697	16.9852	9.83763	73.8166	23	17.6666	25843.3	10510.3	33298.5	10603.9	7387.39	4169.56	10261.5	11056.1	10671.2	10796.5	5242	52.1318	15.7723	6.73433	844.999	99.6652	4176.12	249.358	37.744	12.2547	36.4512	15398.3	43407.6	40792.8	47276.1	52867.7	krt13	keratin, type I cytoskeletal 13-like [Fundulus heteroclitus]
g20698.t1	8202.59	3.55934	0.00221555	18.5458	25.4778	31.3015	14.7633	24	18.4696	12472.8	13106.9	14436.9	17531.2	7396.47	2704.65	5767.64	9086.23	7062.47	6477.08	4019	36.9968	5.81084	2.52537	704.459	27.9435	188.188	128.82	5.8975	5.10613	10.7209	15554.2	43281.8	37512.6	25939.7	24260.5	krt13	keratin, type I cytoskeletal 13 isoform X1 [Fundulus heteroclitus]
g20699.t1	10140	2.70681	0.00929026	31.2351	33.0268	57.2371	670.808	40	34.5301	41376.9	24127.5	66228.1	17806.4	12470.1	4184.81	10787.9	15319.5	13962.4	15165.6	5302	53.8135	142.781	26.0955	1098.85	9.3145	1369.9	423.264	135.642	86.8043	182.256	14359.7	40910.4	28923.8	24996.6	43021.6	-	PREDICTED: keratin, type I cytoskeletal 13-like [Cyprinodon variegatus]
g2071.t1	285.122	2.87108	0.000437643	5.85658	18.8725	21.4639	15.686	14	22.4847	149.981	399.163	130.345	293.839	213.001	347.165	91.727	223.522	323.927	295.682	438	12.6125	9.96144	10.9433	53.581	32.6008	11.0699	27.6042	3.5385	4.08491	17.1535	1513.38	640.42	744.742	891.964	623.727	NPC1L1	Niemann-Pick C1-like protein 1 [Fundulus heteroclitus]
g20717.t1	97.3641	3.13753	3.32533e-43	0.976096	1.88725	5.36598	5.53624	1	3.2121	72.2129	46.7769	30.2587	37.3129	59.5594	47.5445	37.4884	28.6285	46.5848	35.151	25	38.6784	39.8458	21.8866	28.9865	36.3266	35.9772	34.0452	37.744	12.2547	30.0187	435.775	261.604	267.925	296.667	335.853	ST6GALNAC2	alpha-N-acetylgalactosaminide alpha-2,6-sialyltransferase 2-like [Fundulus heteroclitus]
g20720.t1	6611.54	2.16314	1.06469e-07	2091.77	2354.34	2743.8	1600.9	2370	2777.66	3667.3	5122.59	4275.78	4694.43	4092.44	7094.9	5972.63	1849.84	2088.73	1780.29	1816	7910.58	5399.93	8690.65	3059.39	3878.56	2975.04	3218.65	953.036	4968.27	941.299	27526.2	13177	12677.3	15953.2	15381.8	mvp	PREDICTED: major vault protein [Poecilia mexicana]
g20724.t1	2338.2	3.07399	6.7071e-10	121.036	169.852	210.168	167.01	138	120.454	1144.3	1681.89	2300.82	2154.82	1949.31	3552.38	1631.15	426.124	486.432	495.215	641	930.805	1241.86	1173.46	339.932	274.778	392.059	683.664	132.104	363.557	320.556	10560.2	4285.89	4554.73	11025.8	7405.62	NUPR1	nuclear protein 1 [Fundulus heteroclitus]
g20735.t1	81.6818	2.05675	0.0202213	0.976096	6.60536	4.47165	2.76812	4	8.03025	126.65	140.331	219.957	78.1239	46.4361	27.809	131.608	114.514	50.9183	76.505	67	0.840835	6.64096	1.68358	8.78378	2.79435	11.9924	9.2014	4.718	2.04245	50.3885	90.4964	370.322	195.268	125.739	241.192	PRSS27	PREDICTED: serine protease 27-like [Cyprinodon variegatus]
g20740.t1	2527.35	2.05775	6.76074e-09	1182.05	1103.1	1127.75	928.243	1342	1455.08	1124.3	1241.15	1251.08	1401.57	1126.58	1553.72	991.45	736.632	774.608	806.404	781	1633.74	1564.78	1868.78	1134.86	1143.82	1149.43	998.352	4163.63	3733.6	2317.87	9971.31	4629.03	3805.45	7850.86	5066.32	amdhd2	N-acetylglucosamine-6-phosphate deacetylase isoform X2 [Anabas testudineus]
g20769.t1	550.149	3.41997	1.77588e-05	8.78487	4.71812	6.26031	11.9952	7	9.6363	513.267	414.755	353.794	592.342	500.703	456.607	107.68	459.156	504.849	343.239	371	24.3842	19.9229	15.994	78.1756	13.0403	20.2948	42.3264	143.899	5.10613	3.21628	4339.65	1309.72	1159.5	1428.32	1250.05	glmU	PREDICTED: bifunctional protein GlmU-like [Cyprinodon variegatus]
g20804.t1	243.966	2.27606	3.58935e-05	695.957	805.854	822.784	436.44	390	344.498	187.754	178.792	88.4484	169.074	239.247	437.768	315.062	177.276	166.839	224.346	213	35.3151	52.2975	58.9254	60.6081	27.0121	72.8769	32.2049	58.975	53.1038	81.4792	1272.52	422.983	225.542	974.481	333.26	FLVCR1	feline leukemia virus subgroup C receptor-related protein 1 [Fundulus heteroclitus]
g20830.t1	2084.21	4.22916	2.04346e-14	53.6853	39.6322	33.9845	112.57	12	33.7271	1298.72	1329.5	1680.52	1103.06	836.86	766.094	932.425	681.577	749.691	800.201	469	322.04	386.836	337.558	263.513	212.371	325.64	233.716	17.6925	7.14859	67.542	8016.59	6742.24	7789.52	9518.87	8453.38	SPINT1	PREDICTED: kunitz-type protease inhibitor 1-like isoform X1 [Poecilia latipinna]
g20832.t1	118.097	2.44042	1.92882e-06	0.976096	0.943623	7.15464	6.45895	1	3.2121	128.872	139.291	164.095	75.7918	90.8533	53.824	215.359	72.6722	76.9191	81.6743	65	58.8585	78.0313	62.2926	30.7432	43.7782	44.2796	40.4862	8.2565	2.04245	10.7209	196.308	395.803	373.885	271.126	414.954	Pak6	PREDICTED: serine/threonine-protein kinase PAK 6-like isoform X1 [Poecilia formosa]
g20852.t1	25.5175	2.43487	0.00244175	1.95219	0.943623	0.89433	2.76812	2	0.803025	34.44	29.1056	27.9311	24.4866	23.2181	19.7355	3.98813	38.5383	37.9179	29.9817	30	0.840835	0.83012	1.68358	4.39189	0.93145	0.922493	6.44098	2.359	1.02123	3.21628	77.9661	52.6605	102.932	45.1876	75.2103	allc	probable allantoicase [Xiphophorus hellerii]
g20883.t1	13.1519	2.74339	2.61253e-10	0.976096	1.88725	1.78866	0.922707	4	4.01513	4.44387	1.03949	1.1638	2.33206	2.01896	7.17653	7.17864	6.60657	3.2501	1.03385	7	2.52251	9.13132	10.9433	7.9054	6.52015	6.45745	10.1215	1.1795	16.3396	1.07209	58.4746	25.4809	30.2741	41.2583	42.7921	-	uncharacterized protein LOC105937459, partial [Fundulus heteroclitus]
g20884.t1	12.7931	2.68333	3.45383e-12	0.976096	2.83087	0.89433	0.922707	2	6.4242	2.22194	1.03949	1.1638	1.16603	2.01896	2.6912	5.58339	8.80876	8.66694	8.27081	11	1.68167	4.1506	2.52537	12.2973	9.3145	9.22493	8.28126	1.1795	6.12736	2.14419	55.6901	35.6733	45.4111	21.6115	31.1215	cyp2k1	cytochrome P450 2K3-like isoform X2 [Anarrhichthys ocellatus]
g20885.t1	1139.11	4.65788	1.32252e-06	0.976096	1.88725	4.47165	0.922707	2	0.803025	334.401	313.925	295.604	440.759	254.389	260.149	65.4054	930.425	641.354	469.369	368	9.24919	4.1506	2.52537	47.4324	5.5887	13.8374	40.4862	1.1795	3.06368	13.9372	8780.94	4746.24	2857.87	1996.11	4669.52	cyp2k4	cytochrome P450 2K4-like [Xiphophorus maculatus]
g20886.t1	947.671	4.13457	8.50759e-06	2.92829	2.83087	1.78866	0.922707	1	0.803025	309.96	517.665	427.113	476.905	332.119	348.062	93.3223	663.96	709.606	701.985	616	12.6125	3.32048	14.3105	114.189	6.52015	11.9924	39.566	3.5385	9.19104	19.2977	8474.64	1885.59	2007.17	4192.62	1545.7	cyp2k1	cytochrome P450 2K1 [Fundulus heteroclitus]
g20903.t1	153.043	3.98341	4.68781e-21	55.6375	34.9141	51.8711	23.0677	33	24.8938	21.1084	23.9082	13.9655	11.6603	15.1422	26.0149	21.5359	22.0219	29.2509	33.0833	8	51.291	37.3554	38.7224	21.0811	39.1209	41.5122	64.4098	17.6925	127.653	12.8651	123.91	703.273	896.112	497.064	684.673	-	uncharacterized protein LOC111611337 isoform X1 [Xiphophorus maculatus]
g20944.t1	139.009	2.24965	0.00375442	11.7132	7.54899	10.732	16.6087	19	19.2726	68.88	111.225	73.3191	67.6296	37.3508	27.809	10.3691	197.096	195.006	155.078	115	1.68167	22.4132	5.05075	17.5676	8.38305	2.76748	43.2466	110.873	72.5071	309.835	503.995	315.963	454.111	233.797	322.886	unc93a	protein unc-93 homolog A [Fundulus heteroclitus]
g20965.t1	138.57	3.375	6.74683e-13	0.976096	0.943623	0.89433	8.30436	1	1.60605	82.2116	58.2113	87.2846	62.9655	46.4361	34.0885	55.0362	100.2	89.9195	76.505	55	42.8826	52.2975	31.9881	33.3784	40.9838	48.8921	73.6112	9.436	1.02123	3.21628	420.46	422.983	470.762	522.605	548.517	Samd12	PREDICTED: sterile alpha motif domain-containing protein 12-like isoform X1 [Poecilia reticulata]
g210.t1	1771.86	3.5402	1.00321e-25	362.132	403.871	404.237	365.392	380	403.119	594.368	846.142	707.588	658.806	903.486	1508.87	636.506	412.91	491.849	538.637	588	390.988	309.635	585.887	577.094	706.039	445.564	455.469	199.335	209.351	181.184	8897.89	3497.68	4094.57	9391.17	5372.35	pacsin1b	protein kinase C and casein kinase substrate in neurons protein 1-like isoform X1 [Xiphophorus hellerii]
g21038.t1	788.899	3.57887	0.000255936	9.76096	12.2671	13.4149	9.22707	1	10.4393	155.535	258.832	136.164	321.824	372.499	909.625	51.8457	571.468	646.771	653.394	746	3.36334	3.32048	5.89254	158.986	5.5887	24.9073	23.9236	18.872	10.2123	16.0814	2144.07	2070.75	3949.25	937.152	4940.54	PLB1	phospholipase B1, membrane-associated-like isoform X2 [Xiphophorus hellerii]
g2105.t1	235.651	3.89683	2.43212e-13	134.701	133.995	117.157	107.034	148	118.848	97.7652	143.449	162.931	194.727	124.166	122.001	58.2267	100.2	97.5031	116.825	84	24.3842	39.0156	39.5642	22.8378	19.5605	18.4499	18.4028	4.718	9.19104	15.0093	551.332	913.915	852.215	911.611	1178.73	tesc	calcineurin B homologous protein 3 isoform X1 [Fundulus heteroclitus]
g21054.t1	1011.58	2.3001	4.97968e-20	1051.26	894.555	865.711	1208.75	1017	1210.96	1160.96	924.104	1031.12	1078.58	836.86	811.845	491.338	475.673	496.182	511.757	612	525.522	402.608	524.436	375.067	355.814	297.965	333.091	690.007	550.441	571.427	4289.53	2126.81	1640.85	2383.16	3062.88	NDUFB1	PREDICTED: NADH dehydrogenase [ubiquinone] 1 beta subcomplex subunit 1 [Cyprinodon variegatus]
g21099.t1	28257.5	2.95969	0.0114046	44.9004	48.1248	64.3918	63.6668	34	32.121	11702.9	22025.7	12709.8	24386.3	18322.1	17944	7244.04	33292.7	47854.5	29291.1	41168	137.897	57.2783	63.1343	8150.47	55.887	266.6	1082.08	41.2825	35.7429	50.3885	121687	35923	67512.7	123979	96612.9	APOB	apolipoprotein B-100 isoform X1 [Fundulus heteroclitus]
g2110.t1	1458.6	2.85451	2.11827e-38	1516.85	1198.4	1181.41	1226.28	1051	1006.19	579.925	457.374	565.605	574.852	657.172	709.579	1287.37	744.34	763.774	703.019	785	569.246	508.863	510.126	593.783	637.112	828.398	546.563	319.644	286.965	441.703	3798.06	4652.81	3797.88	5699.53	4663.04	CASTOR1	cytosolic arginine sensor for mTORC1 subunit 1 [Xiphophorus maculatus]
g21102.t1	67.2888	3.39151	9.89796e-22	2.92829	2.83087	3.57732	0.922707	6	8.83328	9.99871	41.5795	29.0949	25.6526	13.1233	12.5589	33.5003	40.7405	34.6678	36.1848	30	12.6125	16.6024	14.3105	15.8108	4.65725	14.7599	22.0834	14.154	13.2759	53.6047	242.252	113.815	320.905	182.715	296.951	-	PREDICTED: syndecan-3-like isoform X1 [Poecilia mexicana]
g2111.t1	190.666	2.79975	2.81507e-12	8.78487	9.43623	5.36598	4.61354	6	10.4393	115.541	191.266	209.483	143.421	87.8249	81.633	15.1549	118.918	130.004	146.807	107	93.3327	112.896	58.0836	44.7973	43.7782	55.3496	57.0487	34.2055	29.6156	70.7583	952.301	310.867	460.166	721.037	455.152	Nipsnap1	protein NipSnap homolog 1 [Fundulus heteroclitus]
g21118.t1	1162.87	2.45121	3.63709e-26	436.315	385.942	391.717	374.619	305	370.998	765.457	792.089	796.036	569.022	732.884	673.697	1093.55	800.496	817.943	892.214	730	556.633	357.782	381.331	433.919	395.866	583.938	346.893	465.902	630.097	561.778	2723.25	2734.95	2916.91	4057.06	3825.35	CRYBG1	PREDICTED: absent in melanoma 1 protein-like [Poecilia reticulata]
g21128.t1	1083.38	5.23319	2.31657e-73	11.7132	19.8161	17.8866	16.6087	34	28.9089	75.5458	134.094	76.8105	118.935	116.09	177.619	157.132	93.593	127.837	108.554	131	87.4469	102.105	157.415	170.405	161.141	161.436	169.306	24.7695	100.08	30.0187	2391.89	4613.74	5549.24	5890.11	4539.85	PRDM1	PREDICTED: PR domain zinc finger protein 1-like [Poecilia mexicana]
g21143.t1	852.269	2.24372	0.00368006	48.8048	75.4899	49.1881	48.9035	67	32.924	1046.53	1103.94	1345.35	773.077	665.248	191.075	449.064	1477.67	1705.22	1675.87	1086	17.6575	112.066	64.8179	299.527	125.746	256.453	92.9341	60.1545	50.0401	70.7583	779.661	1810.84	2605.08	2504.97	3538.78	FNDC1	fibronectin type III domain-containing protein 1 isoform X2 [Fundulus heteroclitus]
g2116.t1	1094.91	2.80024	4.79894e-27	1454.38	1321.07	1621.42	1387.75	1204	1147.52	476.605	663.193	621.467	669.3	572.376	620.77	455.445	361.159	336.927	354.611	386	696.212	674.057	831.69	409.324	435.919	405.897	405.782	406.927	415.639	489.947	6464.23	1459.21	1540.95	4894.02	2271.87	Wsb2	WD repeat and SOCS box-containing protein 2 isoform X2 [Xiphophorus hellerii]
g21172.t1	89.0767	3.12016	0.000131713	0.976096	0.943623	3.57732	3.69083	1	3.2121	105.542	61.3297	103.578	68.7956	84.7964	51.1328	88.5365	73.7733	89.9195	74.4373	61	4.20418	3.32048	3.36717	7.9054	0.93145	9.22493	1.84028	2.359	2.04245	8.57676	71.0049	343.143	399.618	229.867	422.734	Stx11	syntaxin-11-like [Xiphophorus maculatus]
g21174.t1	6184.88	4.12271	2.15085e-80	1046.38	761.504	961.405	1065.73	806	694.617	1327.61	1384.6	1263.88	1332.77	1707.03	1346.5	1857.67	1341.13	1423.55	1348.14	1356	1766.6	1290.01	1393.16	1741.82	2228.96	1559.94	1595.52	719.495	738.347	802.999	21220.7	20055.2	16955	33415.3	27166.5	UTRN	PREDICTED: utrophin isoform X9 [Poecilia reticulata]
g21176.t1	39.3622	2.68574	0.000137086	8.78487	18.8725	12.5206	26.7585	8	13.6514	41.1058	36.382	33.7501	44.3091	29.275	21.5296	33.5003	50.6503	41.168	53.7603	23	0.840835	2.49036	0.841791	3.51351	5.5887	6.45745	4.6007	5.8975	4.08491	15.0093	25.0605	118.911	181.644	76.6225	184.136	Aloxe3	hydroperoxide isomerase ALOXE3 [Fundulus heteroclitus]
g21199.t1	61.1382	3.69811	4.22401e-29	14.6414	11.3235	11.6263	11.9952	8	6.4242	24.4413	46.7769	15.1293	20.9885	6.05689	5.3824	17.5478	23.123	16.2505	33.0833	23	10.9309	10.7916	13.4687	12.2973	29.8064	16.6049	31.2848	27.1285	13.2759	16.0814	89.1042	239.52	201.322	271.126	311.215	ALKAL2	PREDICTED: protein FAM150B [Poecilia latipinna]
g21201.t1	233.095	4.74885	2.80306e-12	2.92829	3.77449	8.04897	4.61354	3	1.60605	71.1019	109.146	88.4484	58.3014	79.749	65.4858	82.9531	77.0766	84.5027	76.505	68	5.04501	4.98072	9.2597	20.2027	16.7661	12.9149	9.2014	1.1795	1.02123	3.21628	696.126	896.927	838.591	1359.56	980.328	FAM110C	protein FAM110C [Xiphophorus hellerii]
g21225.t1	1983.82	6.24448	3.34435e-14	0.976096	8.49261	3.57732	10.1498	20	16.0605	229.97	176.713	110.561	188.897	298.807	470.96	39.0837	194.894	276.259	221.244	275	7.56752	1.66024	2.52537	85.2026	2.79435	30.4423	8.28126	49.539	51.0613	68.6141	10870.7	6706.57	7583.65	9945.2	8721.81	PRKG2	cGMP-dependent protein kinase 1-like [Fundulus heteroclitus]
g21227.t1	1990.92	2.90453	0.0309166	2.92829	5.66174	6.26031	11.0725	8	9.6363	1869.76	2161.09	1542.03	887.347	944.875	773.271	219.347	3181.06	3037.76	3276.28	3069	5.04501	4.1506	1.68358	161.621	0.93145	7.37994	181.268	3.5385	2.04245	6.43257	10322.2	12315.8	4180.85	4328.19	202.29	CTSB	cathepsin B-like [Xiphophorus maculatus]
g21229.t1	42.7029	3.31013	5.38502e-05	0.976096	0.943623	0.89433	4.61354	1	0.803025	74.4348	57.1718	98.9226	27.9847	58.5499	26.912	19.9407	34.1339	37.9179	46.5233	16	0.840835	1.66024	1.68358	4.39189	0.93145	5.53496	1.84028	1.1795	1.02123	1.07209	77.9661	129.103	184.672	100.199	234.708	-	PREDICTED: uncharacterized protein LOC103457577 [Poecilia reticulata]
g21231.t1	827.076	2.76878	7.62483e-140	873.606	878.513	787.905	942.084	799	739.586	278.853	376.294	240.906	384.789	436.096	475.445	366.111	382.08	399.763	346.34	429	300.178	260.658	271.899	364.527	404.249	383.757	381.858	415.184	330.877	410.612	2820.7	2199.85	2235.74	2803.6	2476.75	NCOA7	nuclear receptor coactivator 7-like isoform X1 [Fundulus heteroclitus]
g21239.t1	1026.69	2.00948	2.10071e-09	677.411	495.402	431.067	629.286	473	461.739	676.579	670.469	730.863	860.529	678.372	461.989	538.398	353.451	333.677	372.187	308	897.171	811.027	903.242	296.892	383.758	349.625	418.664	1293.91	1441.97	1056.01	3480.63	2369.72	1777.09	2518.72	2405.43	ACSS1	PREDICTED: acetyl-coenzyme A synthetase 2-like, mitochondrial [Cyprinodon variegatus]
g21253.t1	2328.16	2.44267	5.68394e-05	2046.87	374.618	405.131	1960.75	1458	2314.32	211.084	152.805	320.044	246.032	151.422	74.4565	2103.34	4558.53	945.78	3077.78	1959	977.892	723.864	601.881	899.459	836.442	923.415	1083	305.49	803.705	1392.65	698.911	5036.72	8738.61	9094.5	8975.96	fos	proto-oncogene c-Fos [Fundulus heteroclitus]
g21259.t1	1429.16	2.9831	4.17182e-07	98.5857	105.686	126.995	157.783	92	63.439	357.732	409.558	502.76	369.631	410.859	450.327	543.184	368.867	419.263	400.101	366	942.576	1441.92	1547.21	851.148	984.543	984.3	583.369	18.872	31.658	33.2349	5138.8	3730.4	3832.7	5534.5	4508.73	PTK2B	protein-tyrosine kinase 2-beta-like isoform X1 [Xiphophorus hellerii]
g21274.t1	7.03201	2.23745	2.14273e-09	1.95219	1.88725	0.89433	0.922707	3	0.803025	5.55484	1.03949	5.81898	5.83014	7.06637	1.79413	5.58339	3.30328	7.58357	7.23696	3	3.36334	1.66024	2.52537	2.63513	5.5887	3.68997	6.44098	2.359	1.02123	3.21628	11.138	15.2885	21.1918	25.5408	19.4509	-	uncharacterized protein LOC117272675 [Epinephelus lanceolatus]
g2128.t1	1823.67	5.02152	3.89729e-10	2.92829	0.943623	0.89433	4.61354	7	20.8787	144.426	136.173	108.233	199.391	271.551	360.621	74.9769	316.014	296.843	216.075	368	16.8167	19.9229	0.841791	61.4864	3.7258	20.2948	12.882	710.059	433	967.029	13336.4	7610.29	5817.16	6163.2	5063.73	SUSD2	PREDICTED: sushi domain-containing protein 2-like isoform X2 [Cyprinodon variegatus]
g21286.t1	1931.3	4.45945	1.96738e-09	9.76096	2.83087	8.9433	11.9952	3	15.2575	934.324	459.453	889.14	602.836	557.234	526.578	524.041	953.548	1059.53	1021.45	629	36.9968	39.0156	60.609	102.77	15.8347	107.009	45.0869	4.718	95.9953	79.335	3753.51	6322.66	8276.93	9562.09	10602.1	SH3BGRL3	SH3 domain-binding glutamic acid-rich-like protein 3 [Xiphophorus maculatus]
g21292.t1	182.028	3.46364	2.60533e-15	1.95219	5.66174	9.83763	12.9179	1	3.2121	42.2168	88.3564	66.3363	92.1162	90.8533	251.179	80.5603	35.235	43.3347	46.5233	60	48.7685	91.3132	56.4	15.8108	37.258	23.0623	37.7257	12.9745	17.3609	32.1628	729.54	494.329	634.242	628.697	691.157	tcf21	transcription factor 21 [Fundulus heteroclitus]
g21295.t1	3113.19	3.21764	1.00785e-38	2385.58	1809.87	1258.32	1638.73	1563	1572.32	831.004	967.762	808.838	788.235	743.988	854.007	651.661	1629.62	1252.37	1211.67	1311	1061.13	806.046	1031.19	1647.84	2188.91	1452.93	1513.63	740.726	615.8	1230.76	7756.24	9400.75	9754.3	15018	10162.5	sgk1	serine/threonine-protein kinase Sgk1 isoform X1 [Xiphophorus maculatus]
g21297.t1	1914.7	5.39042	6.87138e-10	0.976096	1.88725	2.68299	0.922707	1	1.60605	435.499	429.308	350.302	447.755	416.916	592.961	40.6789	534.031	524.35	441.455	490	11.7717	7.47108	9.2597	75.5405	8.38305	21.2173	36.8056	8.2565	7.14859	9.64885	13362.8	6343.04	4444.23	10332.2	6273.58	aldh8a1	aldehyde dehydrogenase family 8 member A1 [Fundulus heteroclitus]
g21305.t1	599.745	4.55266	1.06301e-06	12.6893	18.8725	17.8866	23.0677	10	27.3029	245.524	270.267	193.19	282.179	218.048	305.002	78.1674	245.544	284.926	276.038	276	8.40835	1.66024	0.841791	43.9189	2.79435	11.0699	17.4827	1.1795	2.04245	5.36047	3656.05	1771.77	1569.71	3206.36	1816.72	IYD	PREDICTED: iodotyrosine deiodinase 1 isoform X1 [Poecilia reticulata]
g21315.t1	412.092	2.19167	4.787e-13	83.9443	80.208	100.165	79.3528	70	96.363	152.203	207.897	181.552	120.101	156.47	171.34	82.1555	175.074	174.422	162.315	162	272.431	331.218	327.457	164.257	213.302	176.196	191.389	521.339	221.606	599.301	1254.42	1085.49	1036.89	827.13	1138.53	GNPAT	dihydroxyacetone phosphate acyltransferase-like isoform X1 [Xiphophorus couchianus]
g21326.t1	6927.17	3.29467	3.55226e-06	135.677	140.6	201.224	183.619	203	235.286	3139.59	3844.02	2879.23	4822.69	3698.74	649.476	2127.27	6977.64	7106.89	5434.96	5455	774.409	594.366	487.397	2433.11	3052.36	1948.3	1995.78	75.488	159.311	158.67	8414.77	25346.7	26836.4	30409.3	26899.4	vegfaa	vascular endothelial growth factor Ab isoform X1 [Cyclopterus lumpus]
g2134.t1	113.436	5.51712	2.31224e-23	1.95219	3.77449	1.78866	4.61354	1	3.2121	12.2206	10.3949	11.638	17.4904	9.08533	17.9413	12.762	3.30328	10.8337	9.30466	14	9.24919	8.3012	9.2597	0.878378	6.52015	11.9924	5.52084	1.1795	2.04245	2.14419	633.475	317.662	219.487	886.07	374.755	-	nuclear factor 7, brain-like [Fundulus heteroclitus]
g2135.t1	64.1854	4.50907	1.80611e-21	0.976096	1.88725	0.89433	0.922707	1	0.803025	17.7755	41.5795	13.9655	19.8225	16.1517	33.1914	7.17864	13.2131	19.5006	13.4401	15	3.36334	7.47108	7.57612	9.66215	3.7258	9.22493	3.68056	1.1795	6.12736	1.07209	249.213	183.462	239.165	371.324	239.895	TRIM35	nuclear factor 7, brain-like [Fundulus heteroclitus]
g21360.t1	20.3602	2.74459	1.80273e-08	20.498	25.4778	15.2036	11.9952	16	21.6817	11.1097	7.27641	8.14657	4.66411	9.08533	8.07359	4.78576	11.0109	7.58357	8.27081	14	2.52251	5.81084	5.05075	2.63513	5.5887	1.84499	2.76042	27.1285	20.4245	27.8745	104.419	39.0707	56.007	49.117	55.7594	AKAP7	PREDICTED: A-kinase anchor protein 7 isoform gamma [Cyprinodon variegatus]
g21362.t1	540.68	4.82511	1.67776e-16	0.976096	1.88725	2.68299	2.76812	3	3.2121	107.764	111.225	116.38	127.097	102.967	145.325	82.1555	176.175	197.173	177.822	163	29.4292	43.9963	35.3552	36.8919	28.875	67.342	48.7674	2.359	2.04245	11.793	1550.97	2106.42	2154	2825.21	2500.1	IL20RA	PREDICTED: uncharacterized protein LOC106958423 [Poecilia latipinna]
g21394.t1	776.496	4.56499	1.71704e-08	34.1634	61.3355	44.7165	52.5943	87	92.3479	133.316	380.452	240.906	333.484	451.238	964.346	360.527	51.7514	86.6694	97.1821	111	34.4743	24.9036	19.3612	23.7162	20.4919	22.1398	18.4028	8.2565	28.5943	39.6675	9478.45	881.639	734.146	2758.41	1594.98	dio3	thyroxine 5-deiodinase-like [Fundulus heteroclitus]
g2140.t1	182.754	3.68082	2.89273e-06	25.3785	16.0416	12.5206	5.53624	17	32.121	5.55484	104.988	27.9311	16.3244	16.1517	25.1179	65.4054	23.123	13.0004	22.7447	15	31.1109	92.9734	148.997	10.5405	2.79435	10.1474	7.36112	3.5385	425.851	21.4419	466.405	310.867	498.008	1347.77	679.486	il1b	interleukin-1 beta [Fundulus heteroclitus]
g2141.t1	333.888	4.36442	2.25108e-09	7.80877	17.9288	12.5206	8.30436	33	35.3331	26.6632	130.975	25.6035	13.9923	19.1801	25.1179	51.8457	60.5602	17.3339	45.4895	37	21.0209	139.46	233.176	16.6892	7.4516	20.2948	9.2014	2.359	426.873	19.2977	526.271	706.67	1324.49	2389.05	1640.36	il1b	interleukin-1 beta [Fundulus heteroclitus]
g21436.t1	346.377	2.89387	6.58812e-05	28.3068	47.1812	37.5619	22.145	40	25.6968	286.63	304.57	347.975	268.186	303.854	322.944	258.431	318.216	340.177	336.002	399	21.0209	10.7916	20.203	54.4594	32.6008	78.4119	28.5243	12.9745	13.2759	20.3698	487.288	1024.33	1118.63	1524.59	1266.91	bmp2	bone morphogenetic protein 2 [Fundulus heteroclitus]
g21437.t1	1001.34	4.21832	5.37491e-36	6.83267	13.2107	11.6263	12.9179	10	10.4393	277.742	261.951	224.612	248.364	264.484	374.974	281.562	269.768	356.428	285.343	248	151.35	145.271	142.263	260.878	377.237	201.103	158.264	53.0775	50.0401	75.0466	3326.09	3604.7	4050.67	4202.45	4281.8	FERMT1	fermitin family homolog 1 [Fundulus heteroclitus]
g2145.t1	13927.9	2.16583	5.70016e-16	6720.42	5670.23	5990.22	5692.18	5490	5842.81	9580.99	9298.21	10457.9	10434.8	9964.59	14153	12151.8	4014.59	4668.23	4859.1	5174	11294.9	7876.18	8822.81	5704.18	6861.99	6269.26	4212.4	8690.55	12910.3	7422.11	53564.1	32187.5	24011.9	32142.1	36903.6	CTSL	PREDICTED: cathepsin L1-like [Cyprinodon variegatus]
g21456.t1	5191.19	5.84487	3.71818e-11	28.3068	30.1959	23.2526	11.9952	39	43.3634	708.797	1036.37	883.321	850.034	915.6	1521.42	370.896	752.048	953.364	838.454	994	41.2009	14.112	12.6269	236.284	12.1089	84.8693	48.7674	7.077	9.19104	16.0814	25146.9	22095.3	17854.1	26766.8	21407.7	Clic5	chloride intracellular channel protein 5 isoform X1 [Fundulus heteroclitus]
g2146.t1	96.7544	2.2306	0.0283197	4.88048	4.71812	0.89433	5.53624	1	0.803025	251.079	274.425	195.518	235.538	152.432	10.7648	94.1199	159.659	199.34	192.296	102	0.840835	2.49036	0.841791	16.6892	0.93145	4.61246	5.52084	1.1795	7.14859	3.21628	193.523	208.943	181.644	351.678	333.26	CTSL	PREDICTED: cathepsin L1 [Cyprinodon variegatus]
g21463.t1	43.5195	3.67615	2.9389e-09	7.80877	3.77449	9.83763	9.22707	2	3.2121	7.77677	17.6713	13.9655	18.6564	39.3698	15.2501	15.9525	27.5274	20.584	20.677	21	0.840835	0.83012	3.36717	7.02702	1.8629	13.8374	1.84028	4.718	5.10613	6.43257	307.688	37.372	80.2263	251.479	103.738	hunk	hormonally up-regulated neu tumor-associated kinase homolog [Fundulus heteroclitus]
g21472.t1	71.4479	2.7095	2.54921e-05	9.76096	15.098	11.6263	11.9952	6	10.4393	38.8839	39.5005	93.1036	68.7956	21.1991	33.1914	23.1312	96.8963	107.253	72.3696	78	1.68167	3.32048	1.68358	19.3243	21.4234	7.37994	13.8021	16.513	15.3184	16.0814	194.915	241.219	216.46	172.892	243.785	Cyp46a1	cholesterol 24-hydroxylase [Fundulus heteroclitus]
g21473.t1	1221.21	3.34574	5.09438e-55	193.267	141.544	109.108	155.938	122	158.196	266.632	430.348	424.785	572.52	345.243	499.666	404.397	671.668	642.437	505.553	543	264.863	255.677	162.466	361.892	467.588	386.524	409.462	254.772	363.557	509.245	4026.39	4087.14	3996.18	4939.2	3873.33	Cyp46a1	PREDICTED: cholesterol 24-hydroxylase-like [Poecilia mexicana]
g21499.t1	95.401	2.75162	9.15708e-05	16.5936	3.77449	8.9433	16.6087	6	8.03025	107.764	90.4354	103.578	89.7842	66.6258	72.6624	79.7626	100.2	113.754	108.554	83	3.36334	3.32048	1.68358	11.4189	7.4516	27.6748	24.8438	4.718	13.2759	13.9372	104.419	258.206	340.583	328.101	412.36	CLMN	uncharacterized protein LOC105936987 isoform X2 [Fundulus heteroclitus]
g21522.t1	99.4895	2.08452	1.66483e-05	380.678	315.17	277.242	334.943	300	282.665	105.542	75.8826	61.6811	128.263	98.9292	73.5594	119.644	99.0985	113.754	95.1144	110	13.4534	17.4325	21.0448	45.6756	41.9153	27.6748	9.2014	22.4105	22.467	48.2443	194.915	270.097	272.467	255.408	256.753	Cnst	consortin-like isoform X2 [Fundulus heteroclitus]
g21527.t1	127.333	3.58898	2.42385e-10	3.90439	26.4215	26.8299	5.53624	7	9.6363	46.6606	58.2113	98.9226	33.8148	45.4267	10.7648	60.6196	70.47	76.9191	82.7081	37	10.09	4.98072	4.20896	16.6892	7.4516	22.1398	18.4028	9.436	128.675	38.5954	194.915	558.881	511.632	286.843	727.465	IL17F	interleukin-17F-like [Fundulus heteroclitus]
g21530.t1	196.258	3.70098	5.36399e-20	4.88048	7.54899	8.04897	4.61354	8	8.83328	86.6555	121.62	88.4484	95.6143	98.9292	59.2064	76.5721	95.7952	83.4193	90.9789	92	51.291	48.1469	60.609	42.1621	15.8347	35.9772	25.7639	9.436	8.16981	43.9559	247.821	873.145	670.57	850.706	936.239	Paqr8	PREDICTED: membrane progestin receptor beta-like [Poecilia latipinna]
g21531.t1	184.657	3.34191	0.000716956	2.92829	1.88725	2.68299	2.76812	1	2.40908	146.648	144.489	132.673	109.607	157.479	88.8095	78.965	208.107	213.423	178.856	123	1.68167	0.83012	0.841791	13.1757	0.93145	23.0623	4.6007	2.359	1.02123	5.36047	103.027	796.703	796.208	524.569	954.393	-	uncharacterized protein LOC101166101 [Oryzias latipes]
g21546.t1	1069.55	4.08069	8.7792e-08	38.0678	100.024	43.8222	63.6668	85	50.5906	303.294	391.887	308.406	304.333	313.949	290.649	86.9413	723.419	815.776	742.305	651	14.2942	24.0735	14.3105	143.176	10.246	12.9149	46.9271	47.18	49.0189	69.6862	4086.26	3696.43	4872.61	4406.77	3389.65	Mep1a	meprin A subunit alpha [Fundulus heteroclitus]
g21547.t1	570.79	5.39881	1.69038e-09	0.976096	0.943623	0.89433	1.84541	1	1.60605	58.8813	103.949	80.3019	96.7803	77.7301	145.325	7.97626	156.355	172.255	154.044	199	8.40835	1.66024	0.841791	28.9865	1.8629	6.45745	11.9618	3.5385	2.04245	1.07209	2422.52	2413.89	1995.06	2950.95	2417.1	Mep1a	meprin A subunit alpha, partial [Fundulus heteroclitus]
g21553.t1	2.70255	2.11673	0.000112341	3.90439	2.83087	2.68299	0.922707	2	2.40908	3.3329	1.03949	2.32759	1.16603	1.00948	0.897066	3.19051	1.10109	1.08337	2.0677	1	2.52251	0.83012	0.841791	0.878378	0.93145	1.84499	1.84028	1.1795	2.04245	1.07209	1.39225	13.5898	6.05481	5.89404	7.78038	ADGRF1	adhesion G-protein coupled receptor F1-like [Fundulus heteroclitus]
g21556.t1	22.8024	2.92465	1.07838e-05	0.976096	0.943623	0.89433	3.69083	1	2.40908	12.2206	17.6713	17.4569	8.1622	14.1327	11.6619	18.3454	7.70766	8.66694	6.20311	3	0.840835	1.66024	0.841791	1.75676	0.93145	3.68997	1.84028	27.1285	28.5943	32.1628	37.5908	86.635	98.3907	55.011	81.694	Adgrf5	PREDICTED: adhesion G protein-coupled receptor F5-like isoform X2 [Poecilia mexicana]
g21592.t1	253.837	3.84491	1.91741e-15	0.976096	2.83087	1.78866	3.69083	2	7.22723	136.649	117.462	109.397	74.6258	57.5404	88.8095	110.87	156.355	126.754	144.739	78	30.2701	27.394	26.9373	45.6756	54.9556	59.0395	45.0869	8.2565	3.06368	20.3698	762.954	983.562	1047.48	891.964	1027.01	TRAF3IP2	adapter protein CIKS isoform X1 [Xiphophorus hellerii]
g21608.t1	959.142	2.23399	0.000328641	7.80877	5.66174	63.4974	82.1209	4	0.803025	263.299	333.675	281.638	225.043	220.067	356.135	207.383	194.894	209.09	156.112	142	1225.94	1451.05	1426.84	701.824	869.975	980.61	921.98	60.1545	35.7429	58.9652	3298.25	2001.1	2075.29	2819.31	2380.8	Frk	tyrosine-protein kinase SRK2-like [Xiphophorus hellerii]
g21666.t1	1379.66	2.59809	5.99885e-06	47.8287	94.3623	147.564	150.401	75	60.2269	212.195	393.966	185.043	194.727	221.076	384.841	154.74	180.579	180.922	186.093	183	1705.21	1847.02	1707.15	830.945	998.515	1128.21	1135.45	195.797	68.4222	235.861	4872.88	3993.71	3764.58	4017.77	3411.7	Baiap2l1	PREDICTED: brain-specific angiogenesis inhibitor 1-associated protein 2-like protein 1 [Cyprinodon variegatus]
g21679.t1	90.3792	2.39356	1.64945e-05	5.85658	3.77449	8.04897	7.38166	2	12.0454	92.2103	103.949	94.2674	97.9463	69.6542	44.8533	37.4884	115.615	115.92	124.062	91	21.8617	18.2626	28.6209	49.1891	5.5887	39.6672	3.68056	21.231	17.3609	21.4419	82.1429	239.52	304.254	286.843	333.26	HS3ST3A1	PREDICTED: heparan sulfate glucosamine 3-O-sulfotransferase 6-like [Cyprinodon variegatus]
g21690.t1	43243.2	2.80095	0.0321314	55.6375	86.8133	59.9201	100.575	47	65.045	73700.5	115249	38200.4	134834	83176.2	975.111	5933.54	45613.9	67030.1	59509.5	66137	113.513	81.3517	54.7164	6874.18	58.6814	92.2493	2396.04	15.3335	24.5094	13.9372	120345	91343.9	94984.9	157180	196099	hba1	hemoglobin subunit alpha-1 [Fundulus heteroclitus]
g21691.t1	1607.33	2.90922	0.0284785	2.92829	5.66174	4.47165	5.53624	4	1.60605	2274.15	3301.41	919.398	4041.45	2408.62	174.928	169.894	1189.18	2307.57	1957.08	3111	4.20418	1.66024	2.52537	301.284	2.79435	2.76748	106.736	1.1795	1.02123	1.07209	2298.61	4897.43	3498.17	4377.3	10152.1	hbb1	hemoglobin subunit beta-1 [Fundulus heteroclitus]
g21702.t1	59.4656	4.36958	1.40939e-08	5.85658	0.943623	0.89433	1.84541	1	0.803025	24.4413	23.9082	23.2759	22.1545	31.2939	27.809	3.98813	28.6285	24.9175	32.0494	33	0.840835	0.83012	0.841791	4.39189	0.93145	0.922493	2.76042	2.359	2.04245	1.07209	380.085	205.546	128.665	235.761	220.444	TMEM238	PREDICTED: transmembrane protein 238-like [Cyprinodon variegatus]
g21719.t1	3890.12	5.86728	1.18976e-34	12.6893	13.2107	6.26031	13.8406	4	12.0454	438.832	561.323	361.94	548.033	717.741	644.991	161.121	572.569	605.603	546.908	461	82.4019	89.6529	144.788	310.946	142.512	64.5745	131.58	112.052	85.783	125.435	18369.4	14024.7	15202.1	19169.4	18107.5	GUCY2C	heat-stable enterotoxin receptor-like [Fundulus heteroclitus]
g21723.t1	6370.48	2.98272	2.28987e-13	2989.78	3256.44	3072.92	3587.49	4072	5051.03	3750.63	3983.31	3703.2	4264.16	3764.36	2906.49	2400.86	1922.51	1847.14	1919.86	2515	1304.98	1397.09	1493.34	1252.57	730.257	859.763	1530.19	7047.51	6625.72	5619.92	30487.5	15626.6	12315.5	23055.5	19705.1	COX6B1	PREDICTED: cytochrome c oxidase subunit 6B1-like [Poecilia latipinna]
g21726.t1	1870.61	4.74372	7.1095e-15	26.3546	17.9288	19.6753	37.831	13	28.9089	726.573	846.142	879.829	827.88	610.736	567.843	621.351	502.099	504.849	551.043	499	42.8826	43.9963	11.7851	88.7161	24.2177	80.2569	71.7709	258.31	81.6981	221.924	4735.05	7180.52	6540.71	10959	8872.23	EPS8L1	epidermal growth factor receptor kinase substrate 8-like protein 1 isoform X2 [Xiphophorus hellerii]
g2173.t1	469.529	2.87098	1.25946e-10	163.984	217.977	264.722	260.203	140	142.135	186.643	182.95	145.474	220.379	202.906	74.4565	141.18	181.681	179.839	130.265	190	369.968	342.839	345.134	273.175	285.955	276.748	364.375	43.6415	17.3609	23.5861	1225.18	1435.42	1716.54	1290.79	1636.47	Unc13b	PREDICTED: protein unc-13 homolog B-like [Poecilia formosa]
g21732.t1	69.4616	2.85815	9.7405e-06	9.76096	9.43623	16.9923	12.9179	14	8.03025	44.4387	39.5005	79.1381	67.6296	57.5404	36.7797	59.0244	70.47	80.1692	58.9295	47	6.72668	5.81084	5.89254	9.66215	8.38305	15.6824	6.44098	4.718	3.06368	7.50466	71.0049	231.027	298.199	141.457	337.15	cpras1	PREDICTED: circularly permutated Ras protein 1-like isoform X1 [Cyprinodon variegatus]
g21765.t1	1142.4	2.04353	6.12174e-06	272.331	225.526	232.526	347.861	251	275.438	502.157	486.48	541.165	642.481	559.253	848.625	376.48	307.205	323.927	323.596	290	512.91	525.466	471.403	314.459	318.556	393.904	527.24	2058.23	1222.41	2569.81	3987.41	2040.17	1787.68	3121.87	3158.83	decr2	PREDICTED: peroxisomal 2,4-dienoyl-CoA reductase isoform X1 [Cyprinodon variegatus]
g21810.t1	3694.93	4.61638	4.54092e-41	291.853	265.158	296.023	119.952	252	295.513	296.628	465.69	349.139	399.948	416.916	571.431	408.385	421.719	436.597	496.249	421	647.443	490.601	688.585	807.229	597.991	956.625	1152.02	161.591	1833.1	196.193	19796.4	9857.71	11604	18935.6	14296.4	PTPRJ	receptor-type tyrosine-protein phosphatase H [Fundulus heteroclitus]
g21811.t1	196.508	5.47706	2.59658e-27	4.88048	0.943623	0.89433	0.922707	3	1.60605	23.3303	28.0662	26.7673	15.1584	26.2465	24.2208	10.3691	52.8525	40.0846	46.5233	44	2.52251	5.81084	5.05075	8.78378	5.5887	8.30243	25.7639	4.718	15.3184	11.793	708.656	738.946	874.92	893.929	998.482	PTPRJ	receptor-type tyrosine-protein phosphatase H [Fundulus heteroclitus]
g21838.t1	797.742	2.1705	6.55521e-06	341.634	281.2	289.763	173.469	311	462.543	141.093	156.963	218.794	93.2822	146.375	143.531	547.969	244.443	244.841	328.765	218	709.665	620.099	895.666	710.608	838.305	845.003	907.258	64.8725	642.352	98.6327	1105.45	1491.48	2691.36	2569.8	2424.88	ITGAM	integrin alpha-M-like [Xiphophorus hellerii]
g21840.t1	64.0083	3.05866	0.000474313	1.95219	5.66174	2.68299	9.22707	3	14.4545	104.431	111.225	136.164	59.4674	46.4361	8.97066	19.143	111.211	74.7524	65.1327	17	1.68167	0.83012	0.841791	4.39189	1.8629	3.68997	3.68056	2.359	1.02123	30.0187	77.9661	246.315	243.706	80.5518	390.316	PRSS36	testisin isoform X2 [Fundulus heteroclitus]
g21841.t1	3467.52	4.92716	2.08903e-22	3855.58	2774.25	2573.88	4095.9	2638	3110.92	734.35	632.008	609.829	1009.78	911.562	1184.13	670.006	868.764	858.027	772.287	856	269.067	166.854	201.188	288.108	159.278	268.445	155.504	40.103	386.024	67.542	25838.8	9249.56	11074.3	14080.9	11316.6	H2-Ab1	uncharacterized protein LOC105917568 [Fundulus heteroclitus]
g21861.t1	1283.45	2.62551	1.08118e-46	106.394	131.164	81.384	136.561	114	136.514	447.72	539.494	544.656	527.045	520.892	755.33	622.149	612.209	633.77	643.056	648	542.339	611.798	411.636	523.513	697.656	571.945	443.507	794.983	609.672	1164.29	3738.2	2954.08	3134.88	4950.99	3997.82	Sult1c1	sulfotransferase 1C1 [Fundulus heteroclitus]
g21875.t1	337.564	2.02799	5.58117e-11	78.0877	90.5878	85.8557	69.203	44	47.3785	262.188	300.412	339.828	272.851	293.759	242.208	417.159	302.801	286.009	237.786	234	213.572	185.117	209.606	165.135	242.177	172.506	146.302	96.719	65.3585	76.1187	1230.75	919.011	732.632	646.379	627.617	ERBB2	PREDICTED: receptor tyrosine-protein kinase erbB-2 isoform X2 [Poecilia mexicana]
g21882.t1	6325.85	4.02429	3.11621e-05	5631.1	5618.33	5233.62	5584.22	5799	7044.94	5617.05	5148.58	5649.06	5411.54	4254.96	1934.97	1534.63	3778.96	3863.29	3815.95	4036	47.9276	22.4132	14.3105	677.229	12.1089	319.182	155.504	30.667	23.4882	39.6675	29100.9	21271.5	16973.2	26442.6	26173.2	ndufa4	PREDICTED: cytochrome c oxidase subunit NDUFA4 [Cyprinodon variegatus]
g21898.t1	1171.12	2.83333	2.34535e-05	26.3546	11.3235	27.7242	48.9035	25	33.7271	725.462	933.459	853.062	684.458	624.869	1354.57	153.144	1172.67	1359.63	1257.16	1061	317.836	334.538	316.514	240.675	170.455	136.529	264.08	100.257	73.5283	69.6862	9667.8	4382.71	1951.16	1768.21	210.07	LRP2	low-density lipoprotein receptor-related protein 2-like [Xiphophorus maculatus]
g21899.t1	20653.4	6.33784	6.61639e-25	11.7132	10.3799	16.9923	24.9131	7	12.0454	1545.36	2826.37	1704.96	2295.91	1985.65	1735.82	764.924	2323.31	2726.84	2519.5	2352	744.139	553.69	377.964	1574.05	847.62	963.082	494.115	44.821	25.5307	217.635	64170.3	88578.4	87249.8	107136	111897	MUC13	PREDICTED: mucin-13-like isoform X2 [Poecilia latipinna]
g21922.t1	179.972	2.45472	8.36237e-06	40.0199	35.8577	40.2448	31.372	42	32.121	107.764	133.054	67.5001	123.599	202.906	341.782	316.658	75.9755	80.1692	73.4035	124	43.7234	82.1819	50.5075	26.3513	25.1492	32.2872	64.4098	49.539	20.4245	18.2256	353.632	687.984	425.351	465.629	596.496	vwa2	von Willebrand factor A domain-containing protein 2 [Fundulus heteroclitus]
g21925.t1	15.9268	2.69476	7.34677e-15	173.745	103.799	87.6443	100.575	62	34.5301	12.2206	19.7503	10.4742	10.4943	4.03793	22.4267	6.38101	6.60657	9.75031	6.20311	9	4.20418	12.4518	13.4687	5.27027	4.65725	4.61246	5.52084	3.5385	6.12736	5.36047	55.6901	59.4554	33.3015	43.2229	46.6823	adrb1	beta-1 adrenergic receptor [Fundulus heteroclitus]
g21928.t1	16.6699	2.68471	0.000517227	0.976096	0.943623	0.89433	2.76812	1	4.01513	2.22194	4.15795	6.98277	2.33206	3.02844	1.79413	31.1074	6.60657	5.41684	2.0677	4	1.68167	2.49036	1.68358	3.51351	2.79435	1.84499	5.52084	3.5385	1.02123	6.43257	6.96126	49.2631	75.6851	17.6821	98.5515	PLEKHS1	pleckstrin homology domain-containing family S member 1 isoform X2 [Xiphophorus couchianus]
g2194.t1	301.712	2.60256	0.000523211	12.6893	13.2107	7.15464	26.7585	16	22.4847	637.696	396.045	678.493	450.087	394.707	119.31	117.251	434.932	424.68	407.338	160	23.5434	29.0542	19.3612	35.1351	17.6976	49.8146	30.3646	11.795	9.19104	42.8838	239.467	1082.09	1074.73	536.357	1476.98	ANXA3	annexin A3-like [Xiphophorus hellerii]
g2195.t1	629.783	2.12024	1.28828e-12	384.582	436.898	364.887	453.972	290	260.18	432.166	561.323	428.277	327.654	621.841	702.403	708.292	361.159	410.596	344.273	520	416.214	403.438	292.943	261.757	264.532	200.181	212.552	344.414	135.823	330.205	2113.44	1306.32	1344.17	1632.65	1576.82	FRAS1	extracellular matrix protein FRAS1 isoform X1 [Xiphophorus hellerii]
g21952.t1	28.4697	2.00887	0.00230949	156.175	159.472	143.093	155.938	124	158.196	25.5523	30.1451	37.2414	43.143	37.3508	31.3973	13.5596	29.7296	40.0846	33.0833	42	0.840835	5.81084	1.68358	10.5405	3.7258	1.84499	5.52084	12.9745	4.08491	22.514	100.242	83.2376	24.2192	49.117	90.7711	KCNH4	potassium voltage-gated channel subfamily H member 4-like isoform X1 [Fundulus heteroclitus]
g22009.t1	2816.38	2.37679	1.72628e-64	2129.84	2711.97	2483.55	2134.22	2620	2939.88	1839.76	1806.63	2136.73	1712.9	1502.11	1355.47	1049.68	1403.9	1518.88	1573.52	1514	1595.91	1587.19	1651.59	1490.61	1382.27	1425.25	1378.37	2062.95	1686.05	1826.85	10643.8	5357.78	5526.53	9230.06	7694.8	VDAC2	PREDICTED: voltage-dependent anion-selective channel protein 2 [Cyprinodon variegatus]
g22028.t1	324.232	2.1419	1.48086e-06	22.4502	11.3235	8.9433	12.9179	21	38.5452	191.086	185.029	233.923	180.734	216.029	334.606	264.812	265.364	294.676	254.328	205	116.035	155.232	141.421	271.419	155.552	176.196	286.164	22.4105	29.6156	24.6582	419.068	971.671	1055.05	721.037	988.108	ADAM9	disintegrin and metalloproteinase domain-containing protein 9-like isoform X1 [Fundulus heteroclitus]
g22029.t1	28.3721	3.20045	4.05976e-10	5.85658	1.88725	2.68299	7.38166	1	1.60605	8.88774	5.19744	17.4569	23.3206	13.1233	7.17653	7.17864	20.9208	29.2509	22.7447	23	1.68167	2.49036	1.68358	7.02702	3.7258	8.30243	9.2014	10.6155	6.12736	3.21628	19.4915	110.417	105.959	119.845	118.002	HTR3A	5-hydroxytryptamine receptor 3A-like [Fundulus heteroclitus]
g22039.t1	116.724	4.2361	7.51121e-19	0.976096	3.77449	0.89433	8.30436	2	0.803025	37.7729	81.08	73.3191	41.977	21.1991	18.8384	23.9288	48.4482	42.2513	40.3202	26	2.52251	5.81084	8.41791	7.02702	20.4919	6.45745	8.28126	34.2055	19.4033	57.8931	158.717	445.066	405.672	795.695	472.01	ST6GALNAC1	alpha-N-acetylgalactosaminide alpha-2,6-sialyltransferase 1 [Fundulus heteroclitus]
g22041.t1	237.128	6.22595	1.02969e-25	10.7371	9.43623	5.36598	11.0725	13	11.2424	28.8852	13.5133	23.2759	12.8263	26.2465	10.7648	16.7502	35.235	48.7516	23.7786	25	2.52251	1.66024	0.841791	10.5405	1.8629	6.45745	3.68056	11.795	1.02123	15.0093	608.414	1065.1	1289.67	827.13	1464.01	ST6GALNAC1	PREDICTED: alpha-N-acetylgalactosaminide alpha-2,6-sialyltransferase 1-like [Cyprinodon variegatus]
g22042.t1	64.2594	2.73743	0.00275784	1.95219	0.943623	0.89433	0.922707	1	0.803025	34.44	40.54	73.3191	60.6335	60.5689	43.9562	57.4291	91.3908	111.587	56.8618	68	3.36334	5.81084	4.20896	6.14864	0.93145	2.76748	2.76042	1.1795	1.02123	1.07209	57.0824	246.315	211.918	198.433	258.049	ST6GALNAC1	PREDICTED: alpha-N-acetylgalactosaminide alpha-2,6-sialyltransferase 1-like [Poecilia reticulata]
g22051.t1	127.354	2.03022	6.49607e-08	124.94	121.727	92.116	167.01	78	81.9086	141.093	99.7908	83.7933	118.935	150.413	210.811	132.406	78.1777	73.669	96.1482	117	50.4501	61.4289	44.6149	49.1891	44.7096	24.9073	49.6876	80.206	36.7642	40.7396	476.15	275.194	225.542	251.479	337.15	THA2	probable low-specificity L-threonine aldolase 2 [Fundulus heteroclitus]
g22072.t1	2978.61	2.38402	4.14123e-80	1036.61	1384.3	1437.19	966.997	1218	1337.04	1854.21	1832.62	1912.12	1826	1568.73	1543.85	1120.67	1614.2	1643.47	1761.68	1699	1616.09	1609.6	1871.3	1653.11	1792.11	1840.37	1547.68	1364.68	1800.42	1441.97	6476.76	7719.01	6245.54	11361.7	9105.64	COX7A2L	PREDICTED: cytochrome c oxidase subunit 7A-related protein, mitochondrial [Cyprinodon variegatus]
g22083.t1	42.4815	2.16964	2.14093e-07	25.3785	42.4631	53.6598	18.4541	26	13.6514	54.4374	51.9744	36.0777	24.4866	24.2276	26.0149	35.0956	25.3252	39.0012	38.2525	35	15.135	26.5638	27.7791	11.4189	15.8347	25.8298	16.5625	7.077	6.12736	22.514	11.138	132.501	152.884	108.057	145.234	KCNK1	potassium channel subfamily K member 1-like [Xiphophorus hellerii]
g22086.t1	901.741	6.112	1.15037e-12	0.976096	0.943623	1.78866	0.922707	1	0.803025	113.319	180.871	132.673	150.418	105.996	171.34	35.8932	115.615	185.256	157.145	158	3.36334	2.49036	1.68358	42.1621	5.5887	21.2173	5.52084	1.1795	1.02123	15.0093	4009.69	3154.53	3408.86	4835.07	4445.19	Clrn3	clarin-3 [Fundulus heteroclitus]
g22115.t1	418.258	2.63189	2.03832e-05	8.78487	17.9288	30.4072	35.9856	22	14.4545	97.7652	166.318	124.526	85.12	112.052	193.766	106.882	139.839	148.421	164.382	129	392.67	433.323	364.496	229.257	367.923	413.277	289.844	5.8975	5.10613	9.64885	1766.77	969.973	544.933	1455.83	1381.02	Gprc5c	PREDICTED: G-protein coupled receptor family C group 5 member C isoform X1 [Poecilia reticulata]
g22128.t1	300.723	4.05055	1.59381e-06	10.7371	2.83087	2.68299	7.38166	3	2.40908	174.422	143.449	217.63	173.738	124.166	97.7802	139.585	171.771	208.007	185.059	115	5.04501	5.81084	3.36717	28.9865	10.246	26.7523	6.44098	1.1795	2.04245	1.07209	332.748	1133.05	1229.13	1398.85	1649.44	PLAU	urokinase-type plasminogen activator-like [Xiphophorus couchianus]
g22129.t1	52.3894	3.99147	6.00829e-09	0.976096	0.943623	0.89433	0.922707	2	1.60605	61.1032	33.2636	34.9139	80.4559	28.2655	21.5296	13.5596	29.7296	34.6678	42.3879	19	1.68167	2.49036	2.52537	5.27027	1.8629	7.37994	2.76042	7.077	2.04245	2.14419	40.3753	224.232	221.001	104.128	403.283	-	PREDICTED: DELTA-stichotoxin-Hcr4a-like [Poecilia latipinna]
g22130.t1	91.7774	3.66801	4.33668e-09	1.95219	0.943623	5.36598	0.922707	2	3.2121	72.2129	53.0138	48.8794	117.769	32.3034	12.5589	23.1312	66.0657	55.2518	57.8957	19	9.24919	5.81084	10.1015	10.5405	75.4475	43.3572	34.9653	2.359	3.06368	1.07209	72.3971	368.624	379.939	196.468	645.771	-	PREDICTED: DELTA-stichotoxin-Hmg2b-like [Poecilia reticulata]
g22134.t1	428.496	3.01633	1.01472e-18	76.1355	37.7449	44.7165	82.1209	41	41.7573	116.652	101.87	103.578	158.58	169.593	203.634	229.716	149.749	160.338	107.521	115	220.299	88.8228	105.224	325.878	307.379	384.679	159.184	152.155	52.0826	100.777	2364.04	784.812	858.27	1954.86	883.073	FMNL3	formin-like protein 1 [Fundulus heteroclitus]
g22136.t1	77.828	2.09061	1.91452e-06	4.88048	2.83087	3.57732	4.61354	1	0.803025	48.8826	55.0928	81.4657	72.2937	62.5878	55.6181	56.6315	55.0547	75.8357	51.6926	68	46.2459	64.7493	50.5075	43.9189	56.8185	47.9696	61.6494	5.8975	6.12736	12.8651	71.0049	207.245	280.035	165.033	258.049	Grb7	growth factor receptor-bound protein 7-like [Fundulus heteroclitus]
g2216.t1	14.4468	2.47057	3.85589e-05	7.80877	5.66174	13.4149	10.1498	11	12.0454	5.55484	5.19744	10.4742	24.4866	17.1612	22.4267	10.3691	8.80876	8.66694	12.4062	14	5.04501	0.83012	4.20896	2.63513	4.65725	1.84499	10.1215	3.5385	2.04245	1.07209	118.341	22.0834	22.7055	23.5761	14.264	Gpr21	probable G-protein coupled receptor 21 [Fundulus heteroclitus]
g22219.t1	2451.1	2.74526	1.44418e-06	0.976096	0.943623	47.3995	87.6572	3	2.40908	405.503	601.863	304.914	595.84	560.262	1016.38	118.846	837.933	1366.13	1088.65	1089	1658.13	1764	1547.21	1314.93	1717.59	1696.46	2131.04	132.104	38.8066	68.6141	9524.4	4851.56	6066.92	8363.64	8063.07	Acsl5	long-chain-fatty-acid--CoA ligase 5 [Fundulus heteroclitus]
g22247.t1	357.837	2.11521	2.42361e-26	529.044	518.049	463.263	475.194	481	332.452	229.97	194.384	233.923	207.553	194.83	166.854	147.561	227.927	256.758	258.463	216	220.299	307.974	241.594	223.108	247.766	215.863	265	120.309	82.7194	171.535	1072.03	959.78	652.406	988.233	861.029	Pnpo	pyridoxine-5'-phosphate oxidase isoform X1 [Fundulus heteroclitus]
g22248.t1	1267.16	4.76914	3.99511e-09	9.76096	4.71812	14.3093	15.686	25	4.81815	295.517	423.071	349.139	279.847	341.205	583.093	102.894	445.943	552.518	559.314	400	13.4534	10.7916	1.68358	76.4189	6.52015	19.3723	43.2466	46.0005	8.16981	79.335	3966.53	3918.96	4907.42	7241.81	5910.49	prr15la	proline-rich protein 15-like protein [Xiphophorus couchianus]
g22272.t1	1123.76	2.53806	3.16053e-21	297.709	171.739	135.044	192.846	191	140.529	608.81	356.544	398.018	475.739	372.499	539.137	436.302	523.02	557.934	660.631	463	1053.57	571.122	713.839	621.891	770.309	915.113	653.299	264.208	208.33	190.833	3424.94	2938.8	2915.39	3343.88	3458.38	acsf2	PREDICTED: acyl-CoA synthetase family member 2, mitochondrial-like [Poecilia formosa]
g22286.t1	1644	4.74297	4.5442e-18	4.88048	3.77449	19.6753	21.2223	8	4.81815	144.426	242.2	148.966	163.244	178.678	235.928	49.4528	271.97	351.011	308.088	385	288.407	306.314	343.451	363.648	339.979	402.207	561.285	5.8975	7.14859	38.5954	5641.41	5714.52	6415.07	8567.96	7265.58	MYO15A	myosin XVB [Xiphophorus hellerii]
g22293.t1	10.6219	2.08628	0.000174559	0.976096	0.943623	0.89433	0.922707	2	3.2121	4.44387	16.6318	16.2931	5.83014	9.08533	6.27946	5.58339	18.7186	7.58357	9.30466	11	1.68167	1.66024	3.36717	2.63513	1.8629	2.76748	2.76042	3.5385	1.02123	7.50466	6.96126	28.8783	27.2467	21.6115	47.979	Gjd3	PREDICTED: gap junction delta-3 protein [Nothobranchius furzeri]
g22312.t1	188.151	2.39419	7.68808e-35	152.271	81.1516	67.9691	101.498	120	83.5146	127.761	94.5933	115.216	127.097	99.9387	122.898	156.335	89.1887	134.338	119.927	114	97.5369	88.8228	95.1224	113.311	81.9676	85.7918	79.132	74.3085	104.165	87.9118	271.489	513.015	501.036	705.32	605.573	GIMAP2	GTPase IMAP family member 6-like [Fundulus heteroclitus]
g2233.t1	35.9202	2.6232	0.00349657	3.90439	6.60536	9.83763	24.9131	3	0.803025	7.77677	7.27641	8.14657	3.49808	5.04741	0.897066	188.24	4.40438	19.5006	7.23696	5	4.20418	5.81084	4.20896	5.27027	6.52015	4.61246	6.44098	1.1795	3.06368	4.28838	20.8838	45.8656	213.432	51.0817	194.509	-	PREDICTED: neoverrucotoxin subunit alpha-like [Poecilia formosa]
g2234.t1	247.999	2.20791	6.75692e-40	315.279	327.437	315.698	255.59	369	417.573	181.088	197.503	205.992	212.217	193.82	152.501	130.013	155.254	132.171	121.994	136	163.122	144.441	148.155	148.446	178.838	183.576	111.337	64.8725	135.823	112.57	765.739	518.112	475.303	829.095	640.585	Nudt12	peroxisomal NADH pyrophosphatase NUDT12 [Fundulus heteroclitus]
g22343.t1	797.227	4.39094	5.18783e-18	932.172	925.695	1085.72	939.316	990	779.737	248.857	290.017	254.871	265.854	269.532	276.296	149.156	310.509	296.843	266.734	341	102.582	100.444	100.173	75.5405	49.3669	92.2493	81.8925	21.231	11.2335	18.2256	3902.48	2492.03	2624.76	4031.52	2701.09	ADAP1	PREDICTED: arf-GAP with dual PH domain-containing protein 1 [Poecilia latipinna]
g22355.t1	83.1459	2.35448	0.00120784	3.90439	4.71812	1.78866	9.22707	2	3.2121	68.88	111.225	54.6984	71.1277	94.8913	166.854	73.3816	47.3471	68.2522	57.8957	96	6.72668	12.4518	12.6269	39.527	17.6976	17.5274	14.7222	2.359	1.02123	1.07209	211.622	190.257	219.487	247.55	261.939	SSTR2	somatostatin receptor type 5-like [Xiphophorus hellerii]
g22359.t1	30.3497	3.2442	1.33043e-05	0.976096	0.943623	0.89433	0.922707	1	0.803025	9.99871	22.8687	25.6035	11.6603	8.07585	35.8826	15.1549	24.2241	34.6678	16.5416	15	1.68167	0.83012	0.841791	4.39189	0.93145	5.53496	1.84028	3.5385	1.02123	1.07209	15.3148	117.212	146.829	100.199	132.266	plcxd1	PREDICTED: PI-PLC X domain-containing protein 1-like isoform X1 [Poecilia mexicana]
g22361.t1	543.831	3.00186	1.187e-33	1054.18	870.021	973.031	959.615	734	851.207	325.514	333.675	299.095	336.982	323.034	237.723	338.194	300.599	301.176	246.057	332	248.046	195.908	231.493	135.27	164.867	129.149	106.736	233.541	90.8892	166.175	2429.48	1746.29	1217.02	1563.88	1733.73	CACNA1G	PREDICTED: voltage-dependent T-type calcium channel subunit alpha-1G isoform X13 [Poecilia reticulata]
g22379.t1	1243.76	3.18391	4.42703e-07	147.391	126.446	117.157	137.483	65	82.7116	944.323	1068.59	1227.8	633.153	761.149	557.078	1489.17	814.81	917.613	839.488	664	338.016	181.796	164.991	276.689	269.189	211.251	276.962	11.795	9.19104	39.6675	3355.33	3086.59	4886.23	4076.71	5237.49	Itgb4	integrin beta-4 isoform X2 [Fundulus heteroclitus]
g22381.t1	246.471	3.88544	4.06026e-22	19.5219	20.7597	21.4639	34.1402	20	16.0605	57.7703	62.3692	65.1725	122.433	77.7301	132.766	21.5359	106.806	104.003	104.419	91	36.9968	79.6915	52.1911	57.0945	46.5725	66.4195	51.5278	10.6155	15.3184	10.7209	793.584	740.645	762.906	1284.9	1011.45	-	PREDICTED: small integral membrane protein 6-like [Nothobranchius furzeri]
g22387.t1	2574.19	2.97755	4.31811e-90	3290.42	3197.94	2396.8	2546.67	2993	2707.8	1182.07	1622.64	2162.33	1164.86	1120.52	967.934	1497.94	1152.85	1096.37	1125.86	1073	1139.33	1223.6	1133.05	848.513	914.684	843.158	875.973	1033.24	851.703	1136.42	11534.8	5850.41	5547.72	10654.5	7261.69	TOB1	protein Tob1-like [Monopterus albus]
g224.t1	159.306	2.40038	8.21449e-05	343.586	332.155	318.381	277.735	320	281.862	199.974	194.384	196.681	160.912	164.545	78.0448	130.013	204.804	227.507	142.672	202	16.8167	15.7723	13.4687	42.1621	20.4919	26.7523	20.2431	23.59	18.3821	39.6675	260.351	439.97	572.18	408.653	518.692	MAGI3	membrane-associated guanylate kinase, WW and PDZ domain-containing protein 3 isoform X2 [Fundulus heteroclitus]
g22423.t1	762.346	3.63452	1.70022e-17	129.821	154.754	153.825	105.189	127	142.135	244.413	269.227	192.026	211.051	237.228	405.474	107.68	72.6722	110.504	111.656	108	545.702	408.419	507.6	101.013	153.689	148.521	109.497	278.362	361.514	166.175	6602.06	1892.38	1270	2068.81	1781.71	Slc9a3r1	Na(+)/H(+) exchange regulatory cofactor NHE-RF1 [Fundulus heteroclitus]
g22435.t1	1368	3.0835	0.000321531	7.80877	4.71812	8.9433	9.22707	6	11.2424	1226.51	1144.48	829.786	1419.06	1303.24	1210.14	417.159	1373.06	1422.46	1157.91	1220	10.9309	66.4096	7.57612	142.297	6.52015	15.6824	155.504	185.181	93.9528	107.209	9790.32	3254.76	2652.01	3974.55	2472.86	A1CF	APOBEC1 complementation factor isoform X1 [Fundulus heteroclitus]
g22469.t1	74.8483	2.53715	0.000213409	3.90439	1.88725	0.89433	5.53624	6	1.60605	83.3226	62.3692	144.311	64.1315	57.5404	173.134	43.0718	71.5711	65.0021	57.8957	68	5.04501	10.7916	7.57612	10.5405	12.1089	8.30243	28.5243	3.5385	6.12736	3.21628	123.91	185.161	329.987	245.585	188.026	MFAP4	microfibril-associated glycoprotein 4-like [Fundulus heteroclitus]
g2248.t1	26.5155	3.66354	1.17407e-14	1.95219	4.71812	1.78866	0.922707	3	0.803025	5.55484	9.35538	9.31036	19.8225	29.275	3.58826	11.1668	7.70766	15.1671	9.30466	12	6.72668	8.3012	5.05075	2.63513	10.246	3.68997	4.6007	2.359	2.04245	1.07209	37.5908	129.103	143.802	90.3752	80.3973	-	radiation-inducible immediate-early gene IEX-1 [Oncorhynchus nerka]
g2251.t1	45.263	4.3354	4.51771e-05	0.976096	0.943623	0.89433	0.922707	1	0.803025	1.11097	21.8292	1.1638	9.32822	37.3508	26.912	0.797626	2.20219	53.085	18.6093	1	0.840835	0.83012	0.841791	1.75676	1.8629	2.76748	1.84028	4.718	1.02123	1.07209	1.39225	1.69873	382.967	3.92936	496.648	Gimap4	PREDICTED: GTPase IMAP family member 4-like [Poecilia formosa]
g22518.t1	11.8736	3.04345	3.79246e-08	0.976096	1.88725	0.89433	1.84541	2	1.60605	7.77677	6.23692	6.98277	6.99617	4.03793	1.79413	0.797626	5.50547	7.58357	3.10155	6	5.04501	2.49036	2.52537	2.63513	17.6976	1.84499	13.8021	1.1795	2.04245	2.14419	4.17676	47.5643	34.8152	72.6931	33.715	ACE	angiotensin-converting enzyme-like [Xiphophorus couchianus]
g2252.t1	8.07192	3.46749	5.57131e-06	0.976096	0.943623	0.89433	0.922707	1	0.803025	1.11097	1.03949	1.1638	5.83014	12.1138	7.17653	0.797626	1.10109	5.41684	3.10155	1	0.840835	0.83012	0.841791	1.75676	2.79435	2.76748	1.84028	1.1795	1.02123	1.07209	1.39225	1.69873	66.6029	1.96468	68.7267	GIMAP2	PREDICTED: uncharacterized protein LOC107101542 [Cyprinodon variegatus]
g22523.t1	895.547	3.29221	0.000908472	96.6335	34.9141	31.3015	72.8939	38	19.2726	859.889	778.576	896.122	749.756	725.817	733.8	469.004	682.679	839.61	849.826	785	4.20418	2.49036	10.1015	122.094	16.7661	133.761	28.5243	1.1795	1.02123	18.2256	1070.64	3224.18	3213.59	3180.82	4538.55	dlx3b	PREDICTED: homeobox protein DLX-3 [Poecilia reticulata]
g22547.t1	70.5414	2.83402	0.00241846	2.92829	0.943623	0.89433	0.922707	4	2.40908	51.1045	82.1195	38.4052	39.6449	43.4077	44.8533	49.4528	86.9865	84.5027	65.1327	43	0.840835	0.83012	0.841791	7.02702	0.93145	22.1398	0.92014	1.1795	1.02123	5.36047	30.6296	251.411	293.658	223.973	291.764	RAC1	ras-related C3 botulinum toxin substrate 1-like [Astyanax mexicanus]
g22550.t1	881.611	2.56014	6.7018e-55	181.554	171.739	129.678	232.522	148	185.499	363.286	418.913	406.165	385.955	377.546	488.004	540.791	460.257	431.18	404.236	354	416.214	452.415	378.806	543.716	630.592	409.587	457.31	476.518	304.326	573.571	2280.51	2478.44	2661.09	2597.31	2686.82	Itga3	integrin alpha-3 isoform X1 [Fundulus heteroclitus]
g22551.t1	2235.08	3.31752	1.48756e-08	81.016	75.4899	143.987	175.314	40	48.1815	319.959	488.559	288.621	402.28	694.523	1162.6	346.17	813.709	1006.45	831.217	960	996.39	1001.95	945.332	1177.03	1290.99	1025.81	1137.29	18.872	23.4882	15.0093	8609.69	7916.06	6808.64	6868.52	7882.82	ACE	angiotensin-converting enzyme [Fundulus heteroclitus]
g22552.t1	85.5447	2.92546	2.45663e-07	8.78487	6.60536	6.26031	0.922707	6	3.2121	52.2155	33.2636	30.2587	41.977	34.3224	17.0443	85.346	62.7624	68.2522	54.7941	67	25.2251	9.13132	10.9433	56.2162	50.2983	44.2796	33.125	5.8975	2.04245	3.21628	73.7894	394.104	369.344	294.702	223.038	Abi1	PREDICTED: abl interactor 1-like isoform X1 [Poecilia mexicana]
g22584.t1	66.8066	2.19327	8.73956e-21	54.6614	69.8281	60.8144	56.2851	29	39.3482	37.7729	45.7374	40.7328	30.3167	38.3603	40.368	49.4528	39.6394	54.1684	53.7603	57	38.6784	36.5253	45.4567	29.8648	44.7096	22.1398	43.2466	24.7695	23.4882	33.2349	261.743	154.584	152.884	157.174	138.75	IPMK	inositol polyphosphate multikinase [Fundulus heteroclitus]
g22592.t1	768.08	2.89169	5.36067e-141	250.857	172.683	154.719	211.3	192	224.044	461.052	390.847	388.708	458.249	402.783	464.68	303.098	322.621	301.176	320.494	298	343.902	275.6	274.424	262.635	339.048	270.29	276.042	419.902	366.62	326.989	2710.72	2165.88	2014.74	2567.84	2522.14	DCXR	L-xylulose reductase [Fundulus heteroclitus]
g2261.t1	38445.5	2.98552	3.92688e-12	750.618	460.488	1009.7	1758.68	1339	1007.8	37361.8	30711.6	55234.9	35519.5	19506.2	13979	37941.5	24608.4	25724.6	27265.8	15522	13515.6	14665.7	9521.5	8201.41	9334.06	17666.7	14232.7	3930.09	3084.1	1953.36	62794.8	114149	124993	134021	177780	actb	PREDICTED: actin, cytoplasmic 1-like [Poecilia formosa]
g2262.t1	70.2688	4.35668	4.08858e-08	0.976096	0.943623	0.89433	0.922707	1	0.803025	13.3316	21.8292	12.8017	19.8225	27.256	38.5738	5.58339	36.3361	26.0008	46.5233	37	1.68167	2.49036	0.841791	10.5405	0.93145	0.922493	1.84028	2.359	1.02123	1.07209	303.511	310.867	134.72	445.982	191.916	CYIA	PREDICTED: actin-like [Cyprinodon variegatus]
g22624.t1	125.04	2.89695	4.18763e-17	11.7132	3.77449	6.26031	11.0725	1	8.03025	113.319	84.1985	64.0087	73.4598	67.6353	16.1472	71.7864	90.2897	100.753	87.8774	86	32.7926	29.8843	47.1403	65.8783	56.8185	52.5821	56.1285	25.949	20.4245	24.6582	222.76	426.38	425.351	463.664	421.437	NTF3	neurotrophin-3 [Fundulus heteroclitus]
g2263.t1	7.88782	2.85528	8.19263e-07	0.976096	0.943623	0.89433	0.922707	1	0.803025	13.3316	5.19744	6.98277	4.66411	8.07585	2.6912	9.57152	9.90985	8.66694	4.13541	3	0.840835	0.83012	0.841791	1.75676	0.93145	2.76748	0.92014	1.1795	1.02123	1.07209	4.17676	33.9745	25.733	27.5055	31.1215	IAN9	LOW QUALITY PROTEIN: GTPase IMAP family member 8-like [Mastacembelus armatus]
g2264.t1	247.901	6.68669	5.46869e-26	0.976096	0.943623	1.78866	0.922707	1	0.803025	28.8852	14.5528	12.8017	19.8225	33.3129	14.3531	2.39288	40.7405	22.7507	21.7109	17	5.04501	0.83012	0.841791	12.2973	1.8629	2.76748	2.76042	2.359	3.06368	4.28838	597.276	1620.58	888.544	1304.55	1170.95	BRAFLDRAFT_56687	PREDICTED: actin, clone 302-like isoform X2 [Poecilia reticulata]
g22647.t1	179.996	3.74479	3.23628e-19	290.877	210.428	182.443	294.344	251	266.604	31.1071	46.7769	52.3708	67.6296	77.7301	55.6181	111.668	63.8635	72.5856	71.3358	71	36.9968	34.0349	37.0388	34.2567	25.1492	96.8617	26.6841	18.872	9.19104	13.9372	350.848	222.533	514.659	1102.18	1090.55	Syn3	PREDICTED: synapsin-3 [Poecilia formosa]
g22648.t1	1801.43	3.34113	5.41758e-12	251.833	359.52	340.74	296.189	294	236.089	287.741	472.967	325.863	399.948	471.428	444.945	2390.49	545.042	595.852	588.262	530	671.827	361.932	373.755	858.175	1002.24	1297.02	485.834	60.1545	141.95	110.426	5144.37	4897.43	6224.35	9059.13	5495.54	timp3	PREDICTED: metalloproteinase inhibitor 3 [Poecilia reticulata]
g22679.t1	26731.7	2.26016	5.80877e-22	17867.4	19914.2	19790.6	16630.9	19407	21464.1	20456.2	20304.3	19991.7	25593.1	21177.9	25315.2	20386.5	14884.6	14638.5	13433.9	14180	15626.9	16049.5	16385.5	11036.8	11683.2	12128.9	10569.6	10451.5	22772.3	11230.2	103553	49869.5	49372.4	94369.4	55663.4	ldhb	L-lactate dehydrogenase B chain [Fundulus heteroclitus]
g22680.t1	25390.4	2.24463	2.63037e-33	16844.5	17442.9	16842	16306.1	16969	20267.6	21897.2	20014.3	22609.1	22020.4	19816.1	18457.1	15626.3	13563.3	14382.8	16077.4	16530	13075	11726.3	13546.9	9943.23	9288.42	10449.1	9065.22	19472.4	20352	16714	75758	56985.5	55315.2	77545.9	68632	SLC25A3	phosphate carrier protein, mitochondrial isoform X2 [Salarias fasciatus]
g22691.t1	33995.1	3.52933	0.00169721	20.498	34.9141	39.3505	35.9856	33	32.924	18514.3	25488.2	18356.5	33679.6	33548.1	14941.5	22428.5	26416.4	36551.7	25073	23028	82.4019	100.444	111.958	2563.98	261.738	1122.67	587.049	41.2825	46.9764	80.4071	40141.4	113099	168504	137315	143378	-	ADM2-like [Xiphophorus couchianus]
g22715.t1	1367.12	2.89877	4.64842e-46	460.717	422.743	402.448	364.469	389	448.891	482.16	760.905	671.51	880.351	793.452	833.374	789.65	757.553	703.106	690.613	702	435.553	363.592	367.863	485.743	602.648	533.201	301.806	344.414	615.8	623.959	4761.5	4751.34	3558.72	5062.98	3267.76	Pnpla2	patatin-like phospholipase domain-containing protein 2 [Fundulus heteroclitus]
g22720.t1	478.455	5.20193	1.23829e-31	6.83267	7.54899	5.36598	12.9179	1	1.60605	65.5471	96.6723	52.3708	46.6411	58.5499	111.236	30.3098	86.9865	108.337	58.9295	97	73.1527	24.9036	37.8806	80.8107	57.7499	54.4271	5.52084	9.436	11.2335	16.0814	2771.97	1839.72	2506.69	1689.62	1287.65	cmah	cytidine monophosphate-N-acetylneuraminic acid hydroxylase-like [Fundulus heteroclitus]
[truncated: 655 more rows]

## Sheet: S9
Supplemental Table S9. Genes with enhanced expression in ovary
[truncated: 1,133 more rows]

## Sheet: S10
Supplemental Table S10. Imprinted gene with enhanced expression in trophotaenia and ovary.
[truncated: 49 more rows]

[truncated: 12 more sheets: S11, S12, S13, S14, S15, S16, S17, S18, S19, S20, S21, S22]
